# Supplementary material for: Identification of a lncRNA involved functional module for esophageal cancer subtypes
Source: Royal Society of Chemistry journal article supplement (doi:10.1039/c6mb00101g), 2016-08-05
Supplement: c6mb00101g2.pdf [file c6mb00101g2.pdf]

**Supplementary Table 1. Detailed information about EC-related expression profile data.**

| Expression profile | Platform       | Number of samples                        | Sample Type |
|--------------------|----------------|------------------------------------------|-------------|
| GSE17351           | HG-U133_Plus_2 | 10 (ESCC: 5; normal: 5)                  | tissue      |
| GSE23400           | HG-U133A       | 106 (ESCC: 53; normal: 53)               | tissue      |
| GSE33810           | HG-U133_Plus_2 | 3 (ESCC: 2; normal: 1)                   | tissue      |
| GSE20347           | HG-U133A_2     | 34 (ESCC: 17; normal: 17)                | tissue      |
| GSE29001           | HG-U133A_2     | 45 (ESCC: 21; normal: 24)                | tissue      |
| GSE26886           | HG-U133_Plus_2 | 69 (BE:20; EAC: 21; ESCC: 9; normal: 19) | tissue      |
| GSE1420            | HG-U133A       | 24 (BE: 8; EAC :8; normal:8)             | tissue      |

ESCC: esophageal squamous cell carcinoma; EAC: esophageal adenocarcinoma ; BE: Barrett's esophagus; Normal: normal esophageal epithelium
