# Supplementary material for: Identification of a lncRNA involved functional module for esophageal cancer subtypes
Source: Royal Society of Chemistry journal article supplement (doi:10.1039/c6mb00101g), 2016-08-05
Supplement: c6mb00101g3.pdf [file c6mb00101g3.pdf]

Supplementary Table 2. List of DE-lncRNAs and DE-PCGs.

| DE-lncRNAs      |                      |             |                | DE-PCGs         |                      |             |                |
|-----------------|----------------------|-------------|----------------|-----------------|----------------------|-------------|----------------|
| Ensembl Gene ID | Associated Gene Name | FC          | t-test p-value | Ensembl Gene ID | Associated Gene Name | FC          | t-test p-value |
| ENSG00000249082 | CTC-276P9.1          | 0.525780903 | 6.21E-13       | ENSG00000185873 | TMPRSS11B            | 0.323872785 | 8.05E-15       |
| ENSG00000241732 | RP11-38P22.2         | 0.527188904 | 1.62E-21       | ENSG00000214711 | CAPN14               | 0.333554921 | 9.07E-15       |
| ENSG00000260581 | CTB-113P19.4         | 0.543539945 | 4.59E-12       | ENSG00000241794 | SPRR2A               | 0.375229451 | 9.89E-34       |
| ENSG00000203688 | RP11-351J23.1        | 0.569122462 | 1.45E-13       | ENSG00000145879 | SPINK7               | 0.389158065 | 1.27E-12       |
| ENSG00000261521 | RP11-408H20.1        | 0.598914387 | 3.80E-11       | ENSG00000170423 | KRT78                | 0.407488454 | 3.94E-15       |
| ENSG00000230937 | MIR205HG             | 0.648438064 | 4.70E-14       | ENSG00000121742 | GJB6                 | 0.411426861 | 6.69E-16       |
| ENSG00000237499 | RP11-356I2.4         | 0.65166902  | 2.42E-08       | ENSG00000172382 | PRSS27               | 0.429540523 | 4.06E-16       |
| ENSG00000261888 | AC144831.1           | 0.660413652 | 8.24E-11       | ENSG00000189001 | SBSN                 | 0.436133995 | 1.90E-16       |
| ENSG00000232079 | AL035610.1           | 0.666174865 | 6.57E-12       | ENSG00000173212 | MAB21L3              | 0.439866424 | 1.70E-13       |
| ENSG00000260402 | RP11-56L13.1         | 0.678770903 | 3.54E-06       | ENSG00000186806 | VSIG10L              | 0.440545603 | 3.16E-25       |
| ENSG00000227028 | SLC8A1-AS1           | 0.681536678 | 3.24E-06       | ENSG00000166535 | A2ML1                | 0.445402332 | 1.10E-14       |
| ENSG00000261040 | CTD-2319I12.1        | 0.684238062 | 8.88E-08       | ENSG00000105427 | CNFN                 | 0.45082844  | 1.03E-20       |
| ENSG00000265787 | CYP4F35P             | 0.704530554 | 2.53E-08       | ENSG00000169550 | MUC15                | 0.482742906 | 8.86E-17       |
| ENSG00000227640 | SOX21-AS1            | 0.708411748 | 1.23E-12       | ENSG00000256812 | CAPNS2               | 0.484007066 | 4.90E-21       |
| ENSG00000236234 | AC091132.1           | 0.716095219 | 0.000100024    | ENSG00000188001 | TPRG1                | 0.48443645  | 2.40E-17       |
| ENSG00000272274 | LINC00551            | 0.716644158 | 1.10E-06       | ENSG00000143556 | S100A7               | 0.485477956 | 4.67E-08       |
| ENSG00000251615 | RP11-774O3.3         | 0.718467203 | 6.94E-15       | ENSG00000188505 | NCCRP1               | 0.494563433 | 1.27E-24       |
| ENSG00000104725 | NEFL                 | 0.73301614  | 0.002010748    | ENSG00000203867 | RBM20                | 0.509715465 | 3.99E-11       |
| ENSG00000261268 | RP11-308D13.3        | 0.738160783 | 1.12E-11       | ENSG00000163141 | BNIP1                | 0.518207146 | 7.40E-13       |
| ENSG00000272582 | RP5-1039K5.17        | 0.749788821 | 5.67E-11       | ENSG00000158055 | GRHL3                | 0.527473225 | 3.60E-16       |
| ENSG00000247095 | MIR210HG             | 0.757195449 | 8.36E-09       | ENSG00000188373 | C10orf99             | 0.531242644 | 3.13E-11       |
| ENSG00000268307 | CTD-2619J13.13       | 0.758794175 | 6.15E-16       | ENSG00000154227 | CERS3                | 0.540713022 | 2.01E-12       |
| ENSG00000228789 | HCG22                | 0.768626215 | 3.26E-08       | ENSG00000174564 | IL20RB               | 0.541811832 | 2.11E-14       |
| ENSG00000236088 | COX10-AS1            | 0.769801737 | 2.84E-07       | ENSG00000197191 | C9orf169             | 0.542077943 | 1.23E-17       |
| ENSG00000261668 | RP11-50D9.3          | 0.771684882 | 2.77E-06       | ENSG00000174226 | SNX31                | 0.544859209 | 1.31E-10       |
| ENSG00000272841 | RP3-428L16.2         | 0.777093812 | 6.96E-05       | ENSG00000165799 | RNASE7               | 0.546281683 | 1.30E-07       |
| ENSG00000230438 | RP11-420G6.4         | 0.778973354 | 2.99E-05       | ENSG00000096006 | CRISP3               | 0.557028068 | 0.003569522    |
| ENSG00000270076 | AF131215.8           | 0.779383671 | 1.65E-05       | ENSG00000166317 | SYNPO2L              | 0.560317357 | 4.72E-08       |
| ENSG00000224905 | AP001347.6           | 0.779954796 | 1.62E-07       | ENSG00000158246 | FAM46B               | 0.566427052 | 1.14E-16       |
| ENSG00000261189 | RP3-512B11.3         | 0.781437388 | 1.62E-09       | ENSG00000124882 | EREG                 | 0.567588679 | 5.30E-10       |
| ENSG00000224818 | RP11-134G8.8         | 0.785076227 | 8.24E-11       | ENSG00000169509 | CRCT1                | 0.569422079 | 0.002389378    |
| ENSG00000259644 | RP11-680F8.4         | 0.789012888 | 4.49E-09       | ENSG00000171004 | HS6ST2               | 0.57046261  | 1.10E-12       |
| ENSG00000270062 | RP11-248J18.3        | 0.795118773 | 9.34E-10       | ENSG00000206072 | SERPINB11            | 0.572140379 | 3.86E-08       |
| ENSG00000260249 | RP11-401P9.5         | 0.798966918 | 9.85E-13       | ENSG00000162398 | C1orf177             | 0.574143381 | 6.15E-12       |
| ENSG00000228288 | PCAT6                | 0.799030157 | 2.39E-07       | ENSG00000140519 | RHCG                 | 0.577408936 | 0.00306364     |
| ENSG00000225138 | CTD-2228K2.7         | 0.804758716 | 4.30E-07       | ENSG00000136155 | SCEL                 | 0.582056887 | 0.003787064    |
| ENSG00000198221 | MLLT4-AS1            | 0.804861915 | 9.70E-05       | ENSG00000161249 | DMKN                 | 0.582078205 | 8.36E-15       |
| ENSG00000269397 | CTB-92J24.2          | 0.812401905 | 2.28E-06       | ENSG00000151136 | BTBD11               | 0.58237317  | 1.85E-13       |
| ENSG00000258616 | RP11-369C8.1         | 0.813231686 | 0.000179307    | ENSG00000087128 | TMPRSS11E            | 0.583536023 | 0.00317483     |
| ENSG00000213963 | AC074286.1           | 0.818616045 | 3.62E-06       | ENSG00000169469 | SPRR1B               | 0.584622597 | 0.007890566    |
| ENSG00000269728 | RP11-145M9.4         | 0.828715715 | 6.97E-05       | ENSG00000171401 | KRT13                | 0.589261342 | 0.006532807    |
| ENSG00000261737 | RP4-612B15.3         | 0.831505126 | 2.82E-12       | ENSG00000143536 | CRNN                 | 0.592828643 | 0.002566508    |
| ENSG00000234222 | RP11-315I20.1        | 0.833190609 | 1.54E-08       | ENSG00000178363 | CALML3               | 0.594957428 | 0.002238801    |
| ENSG00000231734 | RP6-206I17.2         | 0.833976107 | 1.02E-12       | ENSG00000197632 | SERPINB2             | 0.596511498 | 0.004025938    |

|                 |               |             |             |                 |          |             |             |
|-----------------|---------------|-------------|-------------|-----------------|----------|-------------|-------------|
| ENSG00000258655 | ARHGAP5-AS1   | 0.842537611 | 4.00E-07    | ENSG00000172005 | MAL      | 0.599614982 | 0.000859396 |
| ENSG00000166770 | ZNF667-AS1    | 0.844786852 | 1.51E-07    | ENSG00000016602 | CLCA4    | 0.599722084 | 0.002636114 |
| ENSG00000229807 | XIST          | 0.845624381 | 1.81E-05    | ENSG00000188508 | KRTDAP   | 0.600277188 | 3.12E-09    |
| ENSG00000270157 | RP5-894A10.6  | 0.845761192 | 6.82E-06    | ENSG00000126233 | SLURP1   | 0.601049634 | 0.00109717  |
| ENSG00000246375 | RP11-10L7.1   | 0.847139318 | 4.08E-10    | ENSG00000171346 | KRT15    | 0.607036326 | 0.002514537 |
| ENSG00000233967 | RP11-250B2.3  | 0.848733216 | 8.55E-05    | ENSG00000145934 | TENM2    | 0.607593799 | 5.75E-14    |
| ENSG00000273308 | RP11-496H1.2  | 0.851663851 | 1.33E-08    | ENSG00000140254 | DUOXA1   | 0.612436816 | 3.41E-15    |
| ENSG00000223573 | TINCR         | 0.853936541 | 3.13E-11    | ENSG00000177508 | IRX3     | 0.614015354 | 2.40E-12    |
| ENSG00000272686 | RP11-390E23.6 | 0.855231295 | 1.65E-06    | ENSG00000142973 | CYP4B1   | 0.619645521 | 0.000109793 |
| ENSG00000272016 | RP11-215G15.5 | 0.855948032 | 5.66E-06    | ENSG00000188293 | IGFL1    | 0.628062104 | 4.09E-09    |
| ENSG00000235097 | LINC00330     | 0.856245872 | 4.26E-08    | ENSG00000134317 | GRHL1    | 0.629211347 | 5.64E-14    |
| ENSG00000269985 | RP1-232P20.1  | 0.856977018 | 7.67E-06    | ENSG00000176771 | NCKAP5   | 0.630096972 | 1.96E-12    |
| ENSG00000272106 | RP11-345P4.9  | 0.857904682 | 3.52E-07    | ENSG00000166828 | SCNN1G   | 0.631086005 | 1.23E-14    |
| ENSG00000272198 | RP11-309G3.3  | 0.858242494 | 2.96E-08    | ENSG00000186081 | KRT5     | 0.63160128  | 0.008029297 |
| ENSG00000267381 | CTD-2086O20.3 | 0.858976395 | 3.20E-07    | ENSG00000137975 | CLCA2    | 0.631721855 | 0.003882145 |
| ENSG00000235947 | EGOT          | 0.859489954 | 0.000201761 | ENSG00000139926 | FRMD6    | 0.632712331 | 3.72E-14    |
| ENSG00000251603 | RP11-164P12.4 | 0.859515819 | 4.78E-09    | ENSG00000126878 | AIF1L    | 0.635482233 | 1.04E-14    |
| ENSG00000215458 | AP001053.11   | 0.862883899 | 1.14E-05    | ENSG00000143631 | FLG      | 0.636573455 | 0.005004486 |
| ENSG00000269958 | RP11-73M18.8  | 0.863012145 | 2.00E-09    | ENSG00000111405 | ENDOU    | 0.637536119 | 0.001796791 |
| ENSG00000269962 | RP13-238F13.5 | 0.86363022  | 9.70E-07    | ENSG00000163331 | DAPL1    | 0.638135715 | 1.93E-13    |
| ENSG00000232586 | RP11-46A10.4  | 0.865191484 | 3.73E-06    | ENSG00000206073 | SERPINB4 | 0.638334992 | 0.007119014 |
| ENSG00000230551 | CTB-89H12.4   | 0.865220183 | 1.33E-05    | ENSG00000073737 | DHRS9    | 0.641384718 | 4.36E-10    |
| ENSG00000230387 | RP4-737E23.2  | 0.86701149  | 2.77E-09    | ENSG00000125998 | FAM83C   | 0.641771517 | 4.08E-13    |
| ENSG00000236830 | CBR3-AS1      | 0.868121736 | 2.22E-07    | ENSG00000205420 | KRT6A    | 0.646193564 | 0.007542015 |
| ENSG00000204091 | TDRG1         | 0.870628677 | 0.000153913 | ENSG00000169474 | SPRR1A   | 0.646555182 | 0.007939959 |
| ENSG00000263823 | RP11-326K13.4 | 0.87132398  | 2.49E-06    | ENSG00000128849 | CGNL1    | 0.650519562 | 4.38E-14    |
| ENSG00000223799 | IL10RB-AS1    | 0.872186939 | 2.90E-08    | ENSG00000198483 | ANKRD35  | 0.650828082 | 9.94E-14    |
| ENSG00000262714 | RP11-44F14.8  | 0.872961613 | 3.21E-05    | ENSG00000139988 | RDH12    | 0.651468857 | 4.00E-19    |
| ENSG00000227888 | FAM66A        | 0.873418834 | 8.86E-06    | ENSG00000164520 | RAET1E   | 0.652112455 | 7.22E-13    |
| ENSG00000244040 | IL12A-AS1     | 0.874348663 | 8.84E-05    | ENSG00000167768 | KRT1     | 0.652314428 | 0.002660479 |
| ENSG00000245532 | NEAT1         | 0.875495772 | 7.52E-06    | ENSG00000186847 | KRT14    | 0.65243322  | 0.030967526 |
| ENSG00000206567 | AC022007.5    | 0.878063676 | 0.000143415 | ENSG00000134121 | CHL1     | 0.652468265 | 5.66E-09    |
| ENSG00000233429 | HOTAIRM1      | 0.878526351 | 5.60E-05    | ENSG00000145777 | TSLP     | 0.65667547  | 2.59E-11    |
| ENSG00000260231 | JHDM1D-AS1    | 0.880617228 | 9.60E-06    | ENSG00000203837 | PNLIPRP3 | 0.656778482 | 7.76E-06    |
| ENSG00000254109 | RBPMS-AS1     | 0.880703068 | 1.80E-05    | ENSG00000163472 | TMEM79   | 0.658183305 | 2.49E-16    |
| ENSG00000260101 | RP11-568N6.1  | 0.882849069 | 7.26E-05    | ENSG00000092295 | TGM1     | 0.660813646 | 0.003415385 |
| ENSG00000260992 | DOCK9-AS2     | 0.883369465 | 1.06E-08    | ENSG00000125780 | TGM3     | 0.662100794 | 0.000952453 |
| ENSG00000243069 | ARHGEF26-AS1  | 0.883553643 | 1.36E-05    | ENSG00000094755 | GABRP    | 0.66569305  | 5.48E-06    |
| ENSG00000250208 | FZD10-AS1     | 0.883947343 | 4.61E-07    | ENSG00000141579 | ZNF750   | 0.665739589 | 0.000764349 |
| ENSG00000242512 | RP11-416O18.1 | 0.886616191 | 3.16E-08    | ENSG00000108839 | ALOX12   | 0.665821759 | 0.003410225 |
| ENSG00000245694 | CRNDE         | 0.887662487 | 0.019551113 | ENSG00000197580 | BCO2     | 0.66857521  | 1.82E-10    |
| ENSG00000253982 | CTD-2336O2.1  | 0.887915146 | 2.31E-05    | ENSG00000136688 | IL36G    | 0.669544402 | 1.13E-06    |
| ENSG00000223839 | FAM95B1       | 0.888404217 | 2.67E-07    | ENSG00000138271 | GPR87    | 0.66955216  | 0.001706189 |
| ENSG00000261438 | RP11-399O19.9 | 0.890226578 | 2.42E-07    | ENSG00000163209 | SPRR3    | 0.670680272 | 0.006902446 |
| ENSG00000258634 | RP4-773N10.4  | 0.890430962 | 5.65E-05    | ENSG00000170006 | TMEM154  | 0.673711953 | 4.71E-12    |
| ENSG00000259153 | RP6-65G23.3   | 0.891011841 | 7.89E-09    | ENSG00000169583 | CLIC3    | 0.675053056 | 0.010187879 |
| ENSG00000267279 | RP11-879F14.2 | 0.891408715 | 0.000757409 | ENSG00000163202 | LCE3D    | 0.677601291 | 2.36E-06    |

|                 |               |             |             |                 |           |             |             |
|-----------------|---------------|-------------|-------------|-----------------|-----------|-------------|-------------|
| ENSG00000266680 | RP5-1148A21.3 | 0.892364083 | 0.006067127 | ENSG00000175984 | DENND2C   | 0.67797219  | 5.40E-14    |
| ENSG00000225942 | AC093326.2    | 0.893375392 | 9.23E-10    | ENSG00000134762 | DSC3      | 0.680630203 | 0.002484122 |
| ENSG00000229645 | LINC00341     | 0.893786717 | 0.006039709 | ENSG00000057149 | SERPINB3  | 0.680673385 | 0.006259661 |
| ENSG00000236404 | RP11-125B21.2 | 0.895811392 | 7.23E-05    | ENSG00000119938 | PPP1R3C   | 0.682494185 | 0.000161572 |
| ENSG00000237975 | FLG-AS1       | 0.896443947 | 6.13E-10    | ENSG00000196344 | ADH7      | 0.684027462 | 0.00454562  |
| ENSG00000233901 | RP11-65J3.1   | 0.896669566 | 0.004227454 | ENSG00000104722 | NEFM      | 0.688875674 | 7.21E-05    |
| ENSG00000241881 | U66059.58     | 0.896883888 | 0.003328109 | ENSG00000170837 | GPR27     | 0.691703416 | 9.77E-17    |
| ENSG00000267709 | AC024592.9    | 0.89705444  | 1.86E-07    | ENSG00000170954 | ZNF415    | 0.692458821 | 7.62E-10    |
| ENSG00000261116 | RP3-523K23.2  | 0.897061302 | 0.000584275 | ENSG00000118242 | MREG      | 0.692817983 | 4.46E-11    |
| ENSG00000270127 | RP11-526I2.5  | 0.897318384 | 0.030439312 | ENSG00000248485 | PCP4L1    | 0.693155662 | 1.77E-08    |
| ENSG00000267414 | RP11-456K23.1 | 0.897829175 | 2.83E-05    | ENSG00000091844 | RGS17     | 0.69372687  | 3.63E-06    |
| ENSG00000259539 | CTD-2651B20.1 | 0.897855298 | 0.007049549 | ENSG00000109182 | CWH43     | 0.694457117 | 0.003408726 |
| ENSG00000203709 | C1orf132      | 0.897972001 | 0.006526293 | ENSG00000197641 | SERPINB13 | 0.69466254  | 0.00321722  |
| ENSG00000215386 | LINC00478     | 0.897977172 | 1.61E-08    | ENSG00000162444 | RBP7      | 0.694815148 | 6.99E-11    |
| ENSG00000259841 | RP11-488I20.3 | 0.899787285 | 0.002304406 | ENSG00000166123 | GPT2      | 0.696917816 | 2.08E-16    |
| ENSG00000253744 | AC025442.3    | 0.89979118  | 1.06E-06    | ENSG00000137440 | FGFBP1    | 0.696938648 | 0.003195648 |
| ENSG00000259291 | RP11-617F23.1 | 0.901297847 | 0.049365153 | ENSG00000167656 | LY6D      | 0.69727556  | 0.008045298 |
| ENSG00000229891 | Z83851.1      | 0.902216102 | 0.00120226  | ENSG00000196754 | S100A2    | 0.698653393 | 0.015695697 |
| ENSG00000272452 | RP11-391M1.4  | 0.9022352   | 0.01229114  | ENSG00000212900 | KRTAP3-2  | 0.699364392 | 0.00057699  |
| ENSG00000223784 | RP11-554I8.2  | 0.902249312 | 1.74E-05    | ENSG00000105131 | EPHX3     | 0.699623749 | 0.003380723 |
| ENSG00000272734 | ADIRF-AS1     | 0.904716926 | 8.74E-05    | ENSG00000177494 | ZBED2     | 0.699758497 | 0.00278138  |
| ENSG00000242516 | LINC00960     | 0.905343255 | 0.030558559 | ENSG00000170426 | SDR9C7    | 0.699876532 | 5.86E-09    |
| ENSG00000228223 | HCG11         | 0.905702679 | 0.044782246 | ENSG00000134757 | DSG3      | 0.700135909 | 0.006703963 |
| ENSG00000260461 | RP11-541N10.3 | 0.906321876 | 1.40E-05    | ENSG00000121552 | CSTA      | 0.700196193 | 0.010378255 |
| ENSG00000263244 | RP11-473I1.10 | 0.906616399 | 3.42E-07    | ENSG00000185633 | NDUFA4L2  | 0.702482377 | 0.000896722 |
| ENSG00000225092 | RP11-405O10.2 | 0.906659081 | 0.000109047 | ENSG00000077063 | CTTNBP2   | 0.702969808 | 1.06E-07    |
| ENSG00000228463 | AP006222.2    | 0.907122594 | 1.59E-05    | ENSG00000213859 | KCTD11    | 0.70415448  | 3.42E-15    |
| ENSG00000227959 | RP11-276H7.2  | 0.90894043  | 0.001669614 | ENSG00000143882 | ATP6V1C2  | 0.70422798  | 1.11E-08    |
| ENSG00000176728 | TTYT14        | 0.909376616 | 0.027547284 | ENSG00000185479 | KRT6B     | 0.705131917 | 0.026885834 |
| ENSG00000260484 | RP11-1081M5.2 | 0.909627548 | 2.04E-07    | ENSG00000132746 | ALDH3B2   | 0.705629127 | 0.000478941 |
| ENSG00000249790 | RP11-20D14.6  | 0.90980926  | 1.52E-06    | ENSG00000165474 | GJB2      | 0.705867307 | 3.21E-11    |
| ENSG00000269386 | RAB11B-AS1    | 0.910003569 | 6.85E-05    | ENSG00000168447 | SCNN1B    | 0.706753905 | 0.001093043 |
| ENSG00000259359 | RP11-327J17.2 | 0.912235511 | 5.18E-06    | ENSG00000167755 | KLK6      | 0.708084395 | 2.07E-06    |
| ENSG00000256020 | RP5-1154L15.2 | 0.912269554 | 0.000141913 | ENSG00000139433 | GLTP      | 0.709127422 | 0.000323921 |
| ENSG00000233729 | AC016909.1    | 0.912643925 | 9.58E-09    | ENSG00000165449 | SLC16A9   | 0.709562198 | 2.57E-13    |
| ENSG00000227403 | AC009299.3    | 0.913151051 | 0.000214374 | ENSG00000171476 | HOPX      | 0.711317466 | 0.006958434 |
| ENSG00000233694 | AC007365.1    | 0.913375264 | 5.37E-07    | ENSG00000186832 | KRT16     | 0.711450569 | 0.045130183 |
| ENSG00000228237 | EFCAB14-AS1   | 0.913516364 | 2.12E-08    | ENSG00000133710 | SPINK5    | 0.711800323 | 0.012649145 |
| ENSG00000250685 | RP11-486L19.2 | 0.913612647 | 0.000225279 | ENSG00000163207 | IVL       | 0.712384457 | 0.005242839 |
| ENSG00000269956 | MKNK1-AS1     | 0.914751029 | 1.97E-05    | ENSG00000169035 | KLK7      | 0.713246135 | 0.005758954 |
| ENSG00000272343 | RP11-140I16.3 | 0.915061716 | 0.01124479  | ENSG00000121236 | TRIM6     | 0.713740403 | 2.32E-08    |
| ENSG00000255100 | RP11-21L23.3  | 0.915163289 | 0.000777048 | ENSG00000134760 | DSG1      | 0.713937312 | 0.010568455 |
| ENSG00000196668 | LINC00173     | 0.91556893  | 3.84E-09    | ENSG00000137857 | DUOX1     | 0.714016389 | 0.002602306 |
| ENSG00000175873 | AC004840.9    | 0.915598578 | 0.006090726 | ENSG00000129151 | BBOX1     | 0.715958755 | 0.001412244 |
| ENSG00000267670 | CTB-55O6.4    | 0.916274719 | 0.013138559 | ENSG00000167916 | KRT24     | 0.716244441 | 0.012532138 |
| ENSG00000250596 | RP11-440I14.2 | 0.916560636 | 0.001019933 | ENSG00000153802 | TMPRSS11D | 0.717025819 | 0.002189422 |
| ENSG00000260042 | CTD-2034I21.1 | 0.91705954  | 1.83E-09    | ENSG00000147394 | ZNF185    | 0.717348202 | 0.002367935 |

|                 |                |             |             |                 |          |             |             |
|-----------------|----------------|-------------|-------------|-----------------|----------|-------------|-------------|
| ENSG00000268505 | RP11-805I24.3  | 0.917103054 | 1.47E-07    | ENSG00000118596 | SLC16A7  | 0.718751377 | 2.49E-09    |
| ENSG00000263731 | RP11-498C9.15  | 0.918312456 | 0.01477644  | ENSG00000124466 | LYPD3    | 0.718770946 | 0.005959305 |
| ENSG00000230269 | RP1-40E16.9    | 0.918412516 | 3.31E-07    | ENSG00000147697 | GSDMC    | 0.718811127 | 7.06E-13    |
| ENSG00000260396 | AC012065.7     | 0.918870158 | 0.003057221 | ENSG00000143320 | CRABP2   | 0.720141617 | 0.002988715 |
| ENSG00000259322 | RP11-762H8.1   | 0.919052734 | 0.004243812 | ENSG00000165272 | AQP3     | 0.721083513 | 0.004266987 |
| ENSG00000272645 | RP11-504P24.8  | 0.919319903 | 5.52E-05    | ENSG00000150782 | IL18     | 0.721205813 | 0.006443029 |
| ENSG00000263724 | DLGAP1-AS3     | 0.919331192 | 5.75E-06    | ENSG00000147689 | FAM83A   | 0.722105621 | 1.43E-11    |
| ENSG00000231324 | AP000696.2     | 0.919334383 | 1.52E-06    | ENSG00000171056 | SOX7     | 0.722564917 | 2.68E-10    |
| ENSG00000232224 | LINC00202-1    | 0.919492276 | 3.63E-06    | ENSG00000047346 | FAM214A  | 0.723088494 | 3.46E-13    |
| ENSG00000227372 | TP73-AS1       | 0.919734195 | 1.09E-05    | ENSG00000081277 | PKP1     | 0.723757643 | 0.002617923 |
| ENSG00000225261 | RP5-937E21.8   | 0.920740941 | 2.99E-10    | ENSG00000059728 | MXD1     | 0.725613105 | 0.001998643 |
| ENSG00000257114 | RP11-25I15.3   | 0.921197858 | 2.07E-06    | ENSG00000159231 | CBR3     | 0.726032511 | 0.000738812 |
| ENSG00000262061 | RP11-1260E13.4 | 0.921231604 | 0.00554483  | ENSG00000150054 | MPP7     | 0.726157584 | 4.98E-14    |
| ENSG00000253314 | LINC00293      | 0.92160335  | 1.52E-05    | ENSG00000198807 | PAX9     | 0.726736056 | 0.001407552 |
| ENSG00000236301 | MRGPRG-AS1     | 0.921693234 | 1.74E-06    | ENSG00000168329 | CX3CR1   | 0.726934596 | 3.36E-09    |
| ENSG00000228812 | RP11-157P1.5   | 0.921826136 | 2.25E-05    | ENSG00000127249 | ATP13A4  | 0.72779722  | 2.93E-11    |
| ENSG00000164621 | SMAD5-AS1      | 0.921906518 | 0.027982937 | ENSG00000196172 | ZNF681   | 0.730593571 | 1.70E-10    |
| ENSG00000256146 | RP11-319E16.2  | 0.924495266 | 5.14E-06    | ENSG00000162040 | HS3ST6   | 0.731037121 | 1.24E-06    |
| ENSG00000257762 | RP11-626I20.3  | 0.924587517 | 4.66E-06    | ENSG00000104140 | RHOV     | 0.731310019 | 3.11E-15    |
| ENSG00000267470 | ZNF571-AS1     | 0.924593013 | 5.02E-06    | ENSG00000046653 | GPM6B    | 0.731516768 | 1.47E-21    |
| ENSG00000236199 | RP11-264I13.2  | 0.924674003 | 0.000505543 | ENSG00000118898 | PPL      | 0.732122085 | 0.004420196 |
| ENSG00000239508 | PLCH1-AS1      | 0.924820887 | 2.17E-06    | ENSG00000143217 | PVRL4    | 0.732607697 | 7.35E-17    |
| ENSG00000255270 | NAV2-IT1       | 0.925000341 | 0.00015149  | ENSG00000007306 | CEACAM7  | 0.734191028 | 3.55E-06    |
| ENSG00000267610 | AC007787.2     | 0.925919671 | 1.68E-08    | ENSG00000060558 | GNA15    | 0.735162521 | 0.007447562 |
| ENSG00000225194 | LINC00092      | 0.926004732 | 0.000406203 | ENSG00000183018 | SPNS2    | 0.736612295 | 9.83E-13    |
| ENSG00000232656 | IDI2-AS1       | 0.926048344 | 0.004883905 | ENSG00000185567 | AHNAK2   | 0.737062073 | 0.004553975 |
| ENSG00000257137 | C12orf80       | 0.92633669  | 7.80E-05    | ENSG00000143369 | ECM1     | 0.737687171 | 0.003163141 |
| ENSG00000222043 | AC079305.10    | 0.926542261 | 0.006959398 | ENSG00000188112 | C6orf132 | 0.737857591 | 8.87E-19    |
| ENSG00000236656 | RP11-144L1.4   | 0.926606074 | 0.000516979 | ENSG00000158825 | CDA      | 0.738390986 | 0.003996229 |
| ENSG00000229589 | ACVR2B-AS1     | 0.926646267 | 0.011455392 | ENSG00000069011 | PITX1    | 0.738675996 | 0.00628976  |
| ENSG00000267701 | RP11-28F1.2    | 0.926647281 | 0.003438209 | ENSG00000138594 | TMOD3    | 0.738738097 | 0.016594935 |
| ENSG00000224702 | RP11-38C18.2   | 0.927422174 | 9.17E-05    | ENSG00000186462 | NAP1L2   | 0.739364716 | 6.91E-11    |
| ENSG00000270055 | CTD-3092A11.2  | 0.927474924 | 0.024256669 | ENSG00000180787 | ZFP3     | 0.739452435 | 8.04E-08    |
| ENSG00000225742 | RP11-513G11.4  | 0.927783813 | 0.000182436 | ENSG00000182983 | ZNF662   | 0.739698776 | 3.24E-09    |
| ENSG00000233997 | AP000475.2     | 0.927792707 | 9.06E-06    | ENSG00000079215 | SLC1A3   | 0.740813456 | 3.59E-11    |
| ENSG00000185904 | LINC00839      | 0.928144759 | 0.000897278 | ENSG00000167767 | KRT80    | 0.740992737 | 2.29E-07    |
| ENSG00000257151 | PWAR6          | 0.928398445 | 0.000833088 | ENSG00000183036 | PCP4     | 0.741461844 | 0.011602096 |
| ENSG00000260793 | RP5-882C2.2    | 0.928430163 | 0.002381877 | ENSG00000111432 | FZD10    | 0.741733677 | 0.003240677 |
| ENSG00000260394 | LA16c-313D11.9 | 0.92854428  | 2.84E-08    | ENSG00000133401 | PDZD2    | 0.742142116 | 0.001291233 |
| ENSG00000263214 | ZNF205-AS1     | 0.928969307 | 0.022899432 | ENSG00000176171 | BNIP3    | 0.742449927 | 0.000460253 |
| ENSG00000261374 | RP11-64K12.10  | 0.928986835 | 0.003032248 | ENSG00000163221 | S100A12  | 0.742832491 | 0.011550434 |
| ENSG00000271738 | RP11-137H2.6   | 0.929472824 | 0.000219659 | ENSG00000164284 | GRPEL2   | 0.743019394 | 2.32E-09    |
| ENSG00000235862 | RP11-338C15.5  | 0.929638426 | 0.014879512 | ENSG00000091513 | TF       | 0.743284985 | 0.0161668   |
| ENSG00000258168 | RP11-588H23.3  | 0.929648754 | 1.66E-06    | ENSG00000152137 | HSPB8    | 0.743408544 | 0.003048603 |
| ENSG00000250056 | LINC01018      | 0.930088734 | 6.51E-06    | ENSG00000103044 | HAS3     | 0.744156317 | 4.37E-07    |
| ENSG00000229699 | RP1-140J1.1    | 0.930194371 | 4.39E-06    | ENSG00000167759 | KLK13    | 0.744766556 | 0.002810347 |
| ENSG00000225135 | RP11-361F15.2  | 0.930250171 | 0.011512238 | ENSG00000088002 | SULT2B1  | 0.745047103 | 0.005522043 |

|                 |                  |             |             |                 |          |             |             |
|-----------------|------------------|-------------|-------------|-----------------|----------|-------------|-------------|
| ENSG00000258920 | FOXN3-AS1        | 0.930458672 | 1.96E-08    | ENSG00000163220 | S100A9   | 0.745183272 | 0.014762318 |
| ENSG00000258716 | RP11-661G16.2    | 0.930863961 | 0.008162022 | ENSG00000135373 | EHF      | 0.745479045 | 4.97E-13    |
| ENSG00000236499 | LINC00896        | 0.930947644 | 0.000104475 | ENSG00000112964 | GHR      | 0.745545906 | 5.46E-05    |
| ENSG00000261879 | RP11-333E1.1     | 0.931094137 | 2.99E-05    | ENSG00000189334 | S100A14  | 0.74626639  | 5.48E-13    |
| ENSG00000100181 | TPTEP1           | 0.931244444 | 3.76E-06    | ENSG00000183943 | PRKX     | 0.746766424 | 7.04E-12    |
| ENSG00000247473 | CARS-AS1         | 0.931340974 | 0.000171309 | ENSG00000070190 | DAPP1    | 0.746786733 | 8.91E-13    |
| ENSG00000259700 | RP11-485O10.3    | 0.93204785  | 0.037014803 | ENSG00000198729 | PPP1R14C | 0.746829343 | 5.76E-07    |
| ENSG00000231890 | AC093391.2       | 0.93210672  | 0.00106897  | ENSG00000167754 | KLK5     | 0.746899155 | 1.95E-06    |
| ENSG00000267650 | CTD-2553C6.1     | 0.932308553 | 0.004304265 | ENSG00000160588 | MPZL3    | 0.747058992 | 2.22E-14    |
| ENSG00000243797 | CTB-111H14.1     | 0.932376899 | 2.93E-06    | ENSG00000013016 | EHD3     | 0.74924294  | 0.000862005 |
| ENSG00000237380 | HOXD-AS2         | 0.932724918 | 0.000506152 | ENSG00000175315 | CST6     | 0.749397602 | 0.014590245 |
| ENSG00000270021 | CTC-203F4.2      | 0.932734163 | 7.44E-05    | ENSG00000179639 | FCER1A   | 0.749959885 | 0.004124986 |
| ENSG00000247556 | OIP5-AS1         | 0.932738474 | 0.000121455 | ENSG00000148841 | ITPRIP   | 0.750203928 | 1.39E-12    |
| ENSG00000259321 | RP11-468E2.5     | 0.932919645 | 0.016955124 | ENSG00000183696 | UPP1     | 0.751608818 | 1.46E-10    |
| ENSG00000261222 | CTD-2006K23.1    | 0.932928341 | 1.42E-06    | ENSG00000135046 | ANXA1    | 0.751753276 | 0.010468134 |
| ENSG00000253302 | STAU2-AS1        | 0.932930612 | 0.000400261 | ENSG00000189280 | GJB5     | 0.751835376 | 0.002005549 |
| ENSG00000224397 | RP11-290F20.3    | 0.932988047 | 0.001208524 | ENSG00000167757 | KLK11    | 0.752191816 | 0.01028868  |
| ENSG00000237781 | RP11-54A4.2      | 0.933011008 | 0.000259729 | ENSG00000177191 | B3GNT8   | 0.752310289 | 2.24E-11    |
| ENSG00000226644 | RP11-128M1.1     | 0.933180037 | 0.002440622 | ENSG00000113369 | ARRDC3   | 0.752823804 | 5.33E-12    |
| ENSG00000256115 | RP11-319E16.1    | 0.933580949 | 2.52E-05    | ENSG00000185306 | C12orf56 | 0.75300365  | 3.05E-06    |
| ENSG00000259267 | RP11-432J9.6     | 0.934024233 | 9.08E-05    | ENSG00000172575 | RASGRP1  | 0.753766865 | 9.31E-08    |
| ENSG00000260907 | AC008088.4       | 0.93405787  | 8.50E-06    | ENSG00000111713 | GYS2     | 0.753844747 | 0.004334377 |
| ENSG00000261504 | RP11-317P15.4    | 0.934165593 | 0.000944004 | ENSG00000132514 | CLEC10A  | 0.754193794 | 1.20E-10    |
| ENSG00000259964 | RP11-673C5.2     | 0.93417282  | 8.94E-06    | ENSG00000134531 | EMP1     | 0.75439061  | 0.003301573 |
| ENSG00000254615 | RP11-395G23.3    | 0.934193934 | 0.018461974 | ENSG00000102409 | BEX4     | 0.754410633 | 0.001295332 |
| ENSG00000254815 | RP11-496I9.1     | 0.934278705 | 0.000318536 | ENSG00000010932 | FMO1     | 0.754537653 | 4.16E-06    |
| ENSG00000240893 | RP11-572C15.5    | 0.93444071  | 1.96E-05    | ENSG00000108242 | CYP2C18  | 0.754598179 | 2.73E-08    |
| ENSG00000253871 | RP11-756K15.2    | 0.934456165 | 2.97E-06    | ENSG00000110852 | CLEC2B   | 0.755039537 | 7.02E-09    |
| ENSG00000236747 | RP11-157D23.1    | 0.934563615 | 0.000315805 | ENSG00000186377 | CYP4X1   | 0.755625202 | 9.06E-06    |
| ENSG00000175061 | FAM211A-AS1      | 0.934572908 | 1.64E-05    | ENSG00000144847 | IGSF11   | 0.755680967 | 7.12E-06    |
| ENSG00000269696 | AC007228.11      | 0.9347381   | 1.89E-05    | ENSG00000111907 | TPD52L1  | 0.755953562 | 0.000921434 |
| ENSG00000176734 | TRIL             | 0.934986103 | 0.039884135 | ENSG00000109846 | CRYAB    | 0.756376738 | 0.002794871 |
| ENSG00000228889 | UBAC2-AS1        | 0.935047891 | 1.05E-05    | ENSG00000198759 | EGFL6    | 0.757418459 | 3.04E-08    |
| ENSG00000179859 | AC025335.1       | 0.935093117 | 0.00216005  | ENSG00000215853 | RPTN     | 0.757494424 | 0.000141091 |
| ENSG00000260647 | RP1-178F10.1     | 0.93557867  | 4.19E-05    | ENSG00000128510 | CPA4     | 0.757625186 | 0.00361997  |
| ENSG00000251230 | RP11-701P16.5    | 0.935814702 | 2.85E-06    | ENSG00000163053 | SLC16A14 | 0.758106977 | 5.31E-05    |
| ENSG00000261295 | RP11-524D16__A.3 | 0.936364256 | 0.005042541 | ENSG00000094963 | FMO2     | 0.758364734 | 9.21E-05    |
| ENSG00000269975 | RP11-58B17.2     | 0.936786186 | 0.000130871 | ENSG00000184254 | ALDH1A3  | 0.758445026 | 1.16E-08    |
| ENSG00000270177 | CTD-2410N18.3    | 0.937054917 | 0.003402518 | ENSG00000234284 | ZNF879   | 0.758799978 | 3.57E-06    |
| ENSG00000205696 | ADARB2-AS1       | 0.937177268 | 2.28E-05    | ENSG00000124102 | PI3      | 0.758874203 | 3.18E-06    |
| ENSG00000272329 | RP11-65L19.4     | 0.937288724 | 4.76E-06    | ENSG00000105668 | UPK1A    | 0.759924552 | 0.016244063 |
| ENSG00000224318 | CHL1-AS2         | 0.937828939 | 6.33E-06    | ENSG00000175121 | WFDC5    | 0.76053079  | 6.79E-12    |
| ENSG00000267010 | RP11-108P20.1    | 0.937857683 | 0.000118695 | ENSG00000126803 | HSPA2    | 0.761273787 | 0.003141258 |
| ENSG00000264464 | RP11-110H1.8     | 0.937987212 | 9.28E-06    | ENSG00000180758 | GPR157   | 0.761656537 | 1.50E-13    |
| ENSG00000181800 | CELF2-AS1        | 0.938011961 | 0.00034606  | ENSG00000123892 | RAB38    | 0.761678824 | 0.013472018 |
| ENSG00000260256 | AP001063.1       | 0.938177484 | 1.07E-05    | ENSG00000136689 | IL1RN    | 0.762957779 | 0.006581907 |
| ENSG00000261683 | LINC00838        | 0.938529051 | 3.55E-05    | ENSG00000172548 | NIPAL4   | 0.763363097 | 1.72E-11    |

|                 |                |             |             |                 |          |             |             |
|-----------------|----------------|-------------|-------------|-----------------|----------|-------------|-------------|
| ENSG00000268240 | RP11-678G14.4  | 0.93861868  | 0.000205329 | ENSG00000170786 | SDR16C5  | 0.763582806 | 3.56E-09    |
| ENSG00000250366 | LINC00617      | 0.938923579 | 8.04E-05    | ENSG00000185052 | SLC24A3  | 0.763895075 | 0.000379109 |
| ENSG00000237594 | AP000251.3     | 0.939063227 | 0.001234566 | ENSG00000086570 | FAT2     | 0.763944225 | 0.001259818 |
| ENSG00000260482 | CTD-2196E14.9  | 0.939182488 | 0.002542361 | ENSG00000114790 | ARHGEF26 | 0.764030307 | 6.01E-13    |
| ENSG00000215560 | TTY5           | 0.939186243 | 0.001456054 | ENSG00000158315 | RHBDL2   | 0.764518955 | 6.95E-10    |
| ENSG00000233452 | STXBP5-AS1     | 0.939260248 | 0.000144521 | ENSG00000108602 | ALDH3A1  | 0.764541119 | 0.00628727  |
| ENSG00000225891 | RP3-476K8.3    | 0.939394774 | 0.000935921 | ENSG00000118495 | PLAGL1   | 0.764618317 | 5.43E-07    |
| ENSG00000259814 | RP11-300A12.2  | 0.939447228 | 2.68E-07    | ENSG00000196968 | FUT11    | 0.765524196 | 1.06E-07    |
| ENSG00000269974 | RP11-932O9.10  | 0.93969945  | 0.040445347 | ENSG00000186474 | KLK12    | 0.765556562 | 0.021795903 |
| ENSG00000272899 | RP11-309L24.9  | 0.939718019 | 0.01170611  | ENSG00000180044 | C3orf80  | 0.766152023 | 0.000623906 |
| ENSG00000225879 | RP3-495K2.3    | 0.939733024 | 0.006316876 | ENSG00000142765 | SYTL1    | 0.767009657 | 4.34E-11    |
| ENSG00000224635 | RP4-564F22.5   | 0.939837411 | 1.42E-05    | ENSG00000185909 | KLHDC8B  | 0.767111158 | 1.49E-13    |
| ENSG00000237399 | PITRM1-AS1     | 0.939838756 | 0.002584137 | ENSG00000010017 | RANBP9   | 0.767140045 | 0.000475216 |
| ENSG00000250073 | RP11-677M14.3  | 0.940280929 | 0.001961668 | ENSG00000205413 | SAMD9    | 0.767823311 | 1.29E-06    |
| ENSG00000260569 | RP11-669I1.1   | 0.940421371 | 0.000156842 | ENSG00000137699 | TRIM29   | 0.768288273 | 0.002513979 |
| ENSG00000226387 | SORCS3-AS1     | 0.940573101 | 0.001172787 | ENSG00000225950 | NTF4     | 0.769501166 | 1.30E-05    |
| ENSG00000227308 | AC009502.4     | 0.940825908 | 5.61E-06    | ENSG00000157625 | TAB3     | 0.770690715 | 1.54E-09    |
| ENSG00000259837 | RP11-672L10.1  | 0.940852996 | 6.18E-05    | ENSG00000030419 | IKZF2    | 0.771195616 | 1.34E-13    |
| ENSG00000260095 | RP11-715J22.3  | 0.94088544  | 0.007112581 | ENSG00000145365 | TIFA     | 0.771708522 | 2.20E-11    |
| ENSG00000259175 | RP11-379K22.2  | 0.940976114 | 8.03E-06    | ENSG00000127955 | GNAI1    | 0.772484415 | 2.97E-08    |
| ENSG00000272100 | RP11-155O18.6  | 0.941067046 | 1.22E-06    | ENSG00000101213 | PTK6     | 0.772643138 | 1.94E-16    |
| ENSG00000224939 | LINC00184      | 0.941082823 | 6.62E-06    | ENSG00000178163 | ZNF518B  | 0.77285489  | 7.39E-06    |
| ENSG00000269859 | CTD-2537I9.16  | 0.94113134  | 0.000442891 | ENSG00000178372 | CALML5   | 0.77350255  | 0.002457614 |
| ENSG00000261338 | RP11-378A13.1  | 0.941235843 | 0.014904942 | ENSG00000163689 | C3orf67  | 0.773554528 | 0.000611726 |
| ENSG00000272180 | RP11-481J13.1  | 0.941276402 | 0.000383638 | ENSG00000025039 | RRAGD    | 0.773623818 | 1.45E-05    |
| ENSG00000261786 | RP4-555D20.2   | 0.941357075 | 0.002433338 | ENSG00000106853 | PTGR1    | 0.774084608 | 1.97E-08    |
| ENSG00000152931 | PART1          | 0.941409559 | 4.27E-05    | ENSG00000137819 | PAQR5    | 0.77442959  | 3.20E-07    |
| ENSG00000260947 | RP11-384P7.7   | 0.941508817 | 0.000317455 | ENSG00000109255 | NMU      | 0.774780532 | 0.023095328 |
| ENSG00000253679 | KB-1410C5.2    | 0.941617137 | 4.97E-05    | ENSG00000143382 | ADAMTSL4 | 0.775241004 | 4.25E-12    |
| ENSG00000248008 | DYNLL1-AS1     | 0.941624267 | 0.004444227 | ENSG00000069667 | RORA     | 0.775263305 | 0.002361269 |
| ENSG00000255224 | CTD-3065J16.9  | 0.941778893 | 2.96E-05    | ENSG00000197930 | ERO1L    | 0.775728776 | 2.39E-13    |
| ENSG00000228723 | SRGAP3-AS2     | 0.941862224 | 7.08E-06    | ENSG00000138764 | CCNG2    | 0.777624409 | 0.000941245 |
| ENSG00000241560 | ZBTB20-AS1     | 0.941871692 | 0.004218101 | ENSG00000146373 | RNF217   | 0.778011173 | 1.02E-19    |
| ENSG00000257499 | RP11-571M6.8   | 0.942131322 | 0.000421878 | ENSG00000156535 | CD109    | 0.778170055 | 4.99E-07    |
| ENSG00000261824 | LINC00662      | 0.942169962 | 0.001146842 | ENSG00000136694 | IL36A    | 0.778715742 | 0.001658454 |
| ENSG00000234007 | AC020601.1     | 0.942443339 | 0.000350154 | ENSG00000170477 | KRT4     | 0.778915876 | 0.007978602 |
| ENSG00000259330 | LINC00984      | 0.942557308 | 0.000649901 | ENSG00000185963 | BICD2    | 0.778976155 | 0.000234858 |
| ENSG00000245832 | RP11-179A16.1  | 0.94275795  | 3.52E-05    | ENSG00000162552 | WNT4     | 0.779455256 | 0.002650548 |
| ENSG00000249476 | CTD-2587M2.1   | 0.942801934 | 0.000598664 | ENSG00000181631 | P2RY13   | 0.77990733  | 2.78E-07    |
| ENSG00000261781 | RP11-174G17.2  | 0.942846622 | 0.001052889 | ENSG00000164120 | HPGD     | 0.780488942 | 1.25E-05    |
| ENSG00000236772 | RP5-1184F4.5   | 0.942968818 | 0.004140411 | ENSG00000133985 | TTC9     | 0.780693655 | 0.00104403  |
| ENSG00000259225 | RP11-1008C21.1 | 0.943310876 | 0.001132199 | ENSG00000120913 | PDLIM2   | 0.780899388 | 0.000217557 |
| ENSG00000273115 | KB-1466C5.1    | 0.943339619 | 0.017748107 | ENSG00000182489 | XKRX     | 0.780918921 | 3.77E-12    |
| ENSG00000251194 | RP1-68D18.2    | 0.943463482 | 0.010043847 | ENSG00000255501 | CARD18   | 0.781190596 | 6.38E-05    |
| ENSG00000272947 | RP11-71H17.9   | 0.94361348  | 0.028501443 | ENSG00000173559 | NABP1    | 0.78158155  | 5.81E-08    |
| ENSG00000260171 | RP11-95H11.1   | 0.943713826 | 5.43E-05    | ENSG00000134463 | ECHDC3   | 0.782152662 | 0.007567248 |
| ENSG00000238062 | SPATA3-AS1     | 0.943793014 | 7.90E-06    | ENSG00000065357 | DGKA     | 0.782681704 | 0.001530282 |

|                 |                |             |             |                 |           |             |             |
|-----------------|----------------|-------------|-------------|-----------------|-----------|-------------|-------------|
| ENSG00000228350 | RP11-148G20.1  | 0.944024805 | 0.004830721 | ENSG00000211789 | TRAV12-2  | 0.782899176 | 0.001569338 |
| ENSG00000246100 | LINC00900      | 0.944077224 | 1.15E-07    | ENSG00000135378 | PRRG4     | 0.783118543 | 5.66E-13    |
| ENSG00000267520 | RP11-373L24.1  | 0.944185588 | 0.019135508 | ENSG00000120594 | PLXDC2    | 0.783240239 | 2.17E-08    |
| ENSG00000272610 | MAG1-IT1       | 0.944204051 | 0.001550887 | ENSG00000064652 | SNX24     | 0.783493643 | 1.59E-13    |
| ENSG00000259968 | RP11-428C6.2   | 0.944283902 | 0.002050509 | ENSG00000242366 | UGT1A1    | 0.783678546 | 0.009460384 |
| ENSG00000230587 | AC093609.1     | 0.944470963 | 0.006786934 | ENSG00000181652 | ATG9B     | 0.78385648  | 1.15E-05    |
| ENSG00000177553 | RP11-56N19.5   | 0.944573895 | 0.000257509 | ENSG00000211445 | GPX3      | 0.78435072  | 0.002391633 |
| ENSG00000265579 | RP11-713C5.1   | 0.944682884 | 0.001612405 | ENSG00000172421 | EFCAB3    | 0.784790616 | 0.001685204 |
| ENSG00000273106 | RP11-559M23.1  | 0.944689208 | 0.00602785  | ENSG00000105894 | PTN       | 0.785116509 | 0.00068829  |
| ENSG00000235823 | LINC00263      | 0.94469066  | 0.008173904 | ENSG00000133134 | BEX2      | 0.785116997 | 0.001236177 |
| ENSG00000260021 | RP11-480I12.10 | 0.944708904 | 9.59E-06    | ENSG00000100711 | ZFYVE21   | 0.785137394 | 0.001443656 |
| ENSG00000231971 | RP11-557H15.3  | 0.944740569 | 0.000199344 | ENSG00000146054 | TRIM7     | 0.785603059 | 9.74E-14    |
| ENSG00000226334 | RP11-217B7.2   | 0.944812228 | 0.042389188 | ENSG00000116031 | CD207     | 0.785990279 | 0.000914308 |
| ENSG00000227528 | DIAPH3-AS1     | 0.944821038 | 5.52E-06    | ENSG00000165861 | ZFYVE1    | 0.786115799 | 3.52E-17    |
| ENSG00000226374 | RP13-614K11.2  | 0.944913709 | 0.001780987 | ENSG00000104833 | TUBB4A    | 0.786848638 | 8.44E-13    |
| ENSG00000269653 | CTB-102L5.7    | 0.944985779 | 0.001294379 | ENSG00000085382 | HACE1     | 0.787524851 | 2.14E-08    |
| ENSG00000233338 | TLR8-AS1       | 0.945078323 | 2.41E-05    | ENSG00000108924 | HLF       | 0.787703069 | 0.006912725 |
| ENSG00000247324 | RP11-510M2.2   | 0.945110989 | 0.00344821  | ENSG00000168564 | CDKN2AIP  | 0.789214171 | 1.33E-07    |
| ENSG00000231964 | RP11-67C2.2    | 0.945299029 | 0.013129302 | ENSG00000188277 | C15orf62  | 0.789813286 | 4.95E-10    |
| ENSG00000226328 | CTA-217C2.1    | 0.945421032 | 0.026368926 | ENSG00000114251 | WNT5A     | 0.789900574 | 4.75E-08    |
| ENSG00000258702 | RP11-433J8.1   | 0.945456058 | 0.000521621 | ENSG00000100292 | HMOX1     | 0.789927628 | 6.67E-09    |
| ENSG00000260920 | RP1-228H13.5   | 0.945493169 | 0.022929907 | ENSG00000172478 | C2orf54   | 0.790344923 | 0.000868745 |
| ENSG00000182057 | Z83851.3       | 0.94551973  | 5.99E-06    | ENSG00000180596 | HIST1H2BC | 0.790428301 | 0.000275512 |
| ENSG00000222044 | RP5-1039K5.16  | 0.945899031 | 0.000685328 | ENSG00000143546 | S100A8    | 0.791103361 | 0.022793464 |
| ENSG00000272774 | RP11-433A10.3  | 0.945992228 | 3.77E-06    | ENSG00000143412 | ANXA9     | 0.791443678 | 0.005881103 |
| ENSG00000215483 | LINC00598      | 0.946186021 | 0.002982068 | ENSG00000110315 | RNF141    | 0.791506979 | 0.000909318 |
| ENSG00000261076 | RP11-179B15.6  | 0.946509489 | 0.000217641 | ENSG00000153292 | GPR110    | 0.791532169 | 0.005929075 |
| ENSG00000267107 | AC011526.1     | 0.946546324 | 0.000383522 | ENSG00000124490 | CRISP2    | 0.791771554 | 0.001075226 |
| ENSG00000229042 | RP1-232N11.2   | 0.94663291  | 0.001275527 | ENSG00000243566 | UPK3B     | 0.792526638 | 0.036696033 |
| ENSG00000225083 | GRTP1-AS1      | 0.946635685 | 1.13E-05    | ENSG00000181804 | SLC9A9    | 0.793030433 | 9.18E-18    |
| ENSG00000125514 | LINC00029      | 0.94677242  | 5.62E-06    | ENSG00000176170 | SPHK1     | 0.793700452 | 2.61E-09    |
| ENSG00000258122 | RP11-61A14.1   | 0.947165725 | 0.031970651 | ENSG00000178761 | FAM219B   | 0.793819169 | 1.23E-14    |
| ENSG00000250986 | AC141928.1     | 0.947208025 | 2.34E-05    | ENSG00000160307 | S100B     | 0.794032322 | 4.63E-07    |
| ENSG00000241369 | CT64           | 0.947319789 | 0.000286008 | ENSG00000107104 | KANK1     | 0.794146754 | 7.35E-05    |
| ENSG00000226803 | RP11-203B9.4   | 0.947477544 | 0.004495717 | ENSG00000164442 | CITED2    | 0.795645255 | 0.009584365 |
| ENSG00000262155 | RP11-266L9.5   | 0.947541682 | 5.19E-05    | ENSG00000178038 | ALS2CL    | 0.795921686 | 2.59E-09    |
| ENSG00000272142 | RP11-428J1.5   | 0.947563004 | 0.006913381 | ENSG00000167880 | EVPL      | 0.796291549 | 0.002866787 |
| ENSG00000233399 | RP11-111I12.1  | 0.947742198 | 0.000429093 | ENSG00000140474 | ULK3      | 0.796375327 | 1.20E-14    |
| ENSG00000257943 | RP11-167N24.3  | 0.94775439  | 1.91E-05    | ENSG00000139679 | LPAR6     | 0.797019716 | 7.81E-08    |
| ENSG00000261126 | RBFADN         | 0.947758425 | 0.000487622 | ENSG00000075391 | RASAL2    | 0.797182833 | 0.003148811 |
| ENSG00000235096 | RP11-83A16.1   | 0.947852598 | 0.001894304 | ENSG00000182544 | MFSD5     | 0.797942795 | 2.69E-14    |
| ENSG00000248964 | RP11-94H18.1   | 0.947937646 | 6.06E-05    | ENSG00000134962 | KLB       | 0.798430538 | 1.38E-08    |
| ENSG00000245711 | NADK2-AS1      | 0.948009159 | 0.000764453 | ENSG00000126562 | WNK4      | 0.798763867 | 0.000646219 |
| ENSG00000248464 | FGF10-AS1      | 0.948188932 | 0.001642613 | ENSG00000101447 | FAM83D    | 0.798768428 | 2.18E-09    |
| ENSG00000254533 | AF186192.1     | 0.948254953 | 0.002092468 | ENSG00000171954 | CYP4F22   | 0.800265423 | 1.43E-09    |
| ENSG00000259907 | RP6-91H8.2     | 0.948360205 | 0.000304962 | ENSG00000146147 | MLIP      | 0.800285635 | 6.48E-10    |
| ENSG00000228127 | RP11-12L8.1    | 0.948425861 | 4.59E-05    | ENSG00000164825 | DEFB1     | 0.800372749 | 0.023573694 |

|                 |                |             |             |                 |           |             |             |
|-----------------|----------------|-------------|-------------|-----------------|-----------|-------------|-------------|
| ENSG00000255318 | RP11-655M14.13 | 0.948427652 | 0.010077033 | ENSG00000143622 | RIT1      | 0.800420431 | 0.001800014 |
| ENSG00000261655 | CTD-3064M3.3   | 0.948437734 | 5.28E-05    | ENSG00000127954 | STEAP4    | 0.800773529 | 4.74E-05    |
| ENSG00000237009 | GLIS3-AS1      | 0.948453038 | 0.002031106 | ENSG00000064655 | EYA2      | 0.800907495 | 0.00305374  |
| ENSG00000270742 | RP4-802A10.1   | 0.948664334 | 0.005130081 | ENSG00000138166 | DUSP5     | 0.801071509 | 0.023179166 |
| ENSG00000228624 | RP3-399L15.3   | 0.948698235 | 0.001766944 | ENSG00000149573 | MPZL2     | 0.801114337 | 0.021401902 |
| ENSG00000253116 | RP11-648L3.2   | 0.948739353 | 0.040073769 | ENSG00000164096 | C4orf3    | 0.801120459 | 3.01E-13    |
| ENSG00000230962 | RP11-113E21.1  | 0.948850423 | 0.002445786 | ENSG00000165072 | MAMDC2    | 0.801348855 | 3.22E-05    |
| ENSG00000228682 | RP11-439L8.3   | 0.948894767 | 0.004627264 | ENSG00000204421 | LY6G6C    | 0.801438041 | 0.01943526  |
| ENSG00000236024 | RP11-483H20.6  | 0.949009207 | 0.000379476 | ENSG00000011198 | ABHD5     | 0.801454934 | 0.002428009 |
| ENSG00000238107 | RP11-495P10.5  | 0.949025223 | 0.005550562 | ENSG00000182247 | UBE2E2    | 0.801550551 | 1.67E-07    |
| ENSG00000234265 | RP11-157E14.1  | 0.949065176 | 0.001130191 | ENSG00000174370 | C11orf45  | 0.801694406 | 5.48E-09    |
| ENSG00000204466 | DGKK           | 0.949111249 | 0.000809271 | ENSG00000142657 | PGD       | 0.80225431  | 0.012473648 |
| ENSG00000272459 | RP11-1277A3.3  | 0.949120481 | 0.011441994 | ENSG00000152454 | ZNF256    | 0.802860551 | 0.000563994 |
| ENSG00000259361 | LINC00927      | 0.949192148 | 9.11E-05    | ENSG00000110723 | EXPH5     | 0.803964605 | 6.95E-10    |
| ENSG00000267712 | RP11-456O19.4  | 0.949362425 | 0.008052235 | ENSG00000196260 | SFTA2     | 0.804167604 | 0.001055245 |
| ENSG00000235733 | RP3-522P13.3   | 0.949404101 | 0.033535935 | ENSG00000138311 | ZNF365    | 0.804255787 | 0.00251732  |
| ENSG00000260917 | RP11-57H14.4   | 0.949410605 | 0.014324721 | ENSG00000214013 | GANC      | 0.804590865 | 1.17E-15    |
| ENSG00000179818 | PCBP1-AS1      | 0.949442146 | 1.70E-05    | ENSG00000112297 | AIM1      | 0.805042376 | 7.91E-11    |
| ENSG00000256508 | RP11-554A11.6  | 0.949545781 | 0.000110734 | ENSG00000176014 | TUBB6     | 0.805071556 | 0.002181105 |
| ENSG00000261478 | RP11-429B14.4  | 0.949805271 | 0.005063605 | ENSG00000117519 | CNN3      | 0.805586495 | 0.001061775 |
| ENSG00000260305 | NTRK3-AS1      | 0.94981233  | 9.57E-06    | ENSG00000121413 | ZSCAN18   | 0.805589408 | 0.019795371 |
| ENSG00000188660 | LINC00319      | 0.949996568 | 0.004552453 | ENSG00000125945 | ZNF436    | 0.805750416 | 2.70E-12    |
| ENSG00000224078 | SNHG14         | 0.950008416 | 0.001352295 | ENSG00000204323 | SMIM5     | 0.806627688 | 4.84E-11    |
| ENSG00000269131 | AC004447.2     | 0.950038861 | 0.042044749 | ENSG00000163644 | PPM1K     | 0.806694145 | 1.39E-07    |
| ENSG00000226497 | RP11-406O16.1  | 0.950127063 | 0.000732952 | ENSG00000169594 | BNC1      | 0.806817472 | 0.006599393 |
| ENSG00000231163 | RP5-1007G16.1  | 0.950213326 | 7.52E-05    | ENSG00000078804 | TP53INP2  | 0.807019647 | 1.72E-11    |
| ENSG00000253298 | AC008703.1     | 0.950452038 | 0.000827546 | ENSG00000186529 | CYP4F3    | 0.80728762  | 0.001006966 |
| ENSG00000241313 | WWTR1-AS1      | 0.950812564 | 0.019123244 | ENSG00000145632 | PLK2      | 0.807353916 | 2.36E-07    |
| ENSG00000250456 | AC006552.1     | 0.950894679 | 0.005976665 | ENSG00000158089 | GALNT14   | 0.807362668 | 0.002894205 |
| ENSG00000261071 | RP1-223E5.4    | 0.950947791 | 0.018176997 | ENSG00000227051 | C14orf132 | 0.807627983 | 7.29E-14    |
| ENSG00000177112 | MRV11-AS1      | 0.951001511 | 0.000187764 | ENSG00000095585 | BLNK      | 0.807636866 | 6.97E-08    |
| ENSG00000224023 | RP11-383C5.4   | 0.95107733  | 0.002195412 | ENSG00000188549 | C15orf52  | 0.807669267 | 3.21E-06    |
| ENSG00000234693 | RP4-530I15.6   | 0.951199324 | 0.000665177 | ENSG00000155850 | SLC26A2   | 0.807718344 | 3.47E-08    |
| ENSG00000269318 | AC007292.3     | 0.951206912 | 0.047307221 | ENSG00000113742 | CPEB4     | 0.807789209 | 1.95E-08    |
| ENSG00000253552 | HOXA-AS2       | 0.951305438 | 1.54E-05    | ENSG00000140022 | STON2     | 0.808328918 | 2.93E-11    |
| ENSG00000245954 | RP11-18H21.1   | 0.951330965 | 0.014639275 | ENSG00000173320 | STOX2     | 0.808331266 | 1.37E-07    |
| ENSG00000246211 | RP11-632K5.3   | 0.951417005 | 0.015411931 | ENSG00000204103 | MAFB      | 0.808985982 | 0.004206252 |
| ENSG00000229481 | CTD-2554C21.3  | 0.95149565  | 0.00088763  | ENSG00000164687 | FABP5     | 0.809241065 | 0.008460912 |
| ENSG00000262152 | LINC00514      | 0.951589691 | 0.001158922 | ENSG00000156299 | TIAM1     | 0.809459144 | 0.001738233 |
| ENSG00000227543 | SPAG5-AS1      | 0.951615144 | 0.000168173 | ENSG00000158488 | CD1E      | 0.810266817 | 5.10E-06    |
| ENSG00000225670 | CTA-134P22.2   | 0.95173788  | 0.014724277 | ENSG00000176974 | SHMT1     | 0.811059626 | 0.002534968 |
| ENSG00000226272 | ARHGAP26-AS1   | 0.951827993 | 0.000505648 | ENSG00000099260 | PALMD     | 0.811060636 | 0.001567253 |
| ENSG00000226454 | RP3-462C17.1   | 0.952054224 | 7.96E-05    | ENSG00000163293 | NIPAL1    | 0.811197031 | 1.47E-07    |
| ENSG00000237941 | KCNQ1DN        | 0.952197257 | 0.018485022 | ENSG00000082397 | EPB41L3   | 0.811224576 | 0.017816873 |
| ENSG00000260600 | RP11-109D24.1  | 0.952216905 | 0.000790936 | ENSG00000180667 | YOD1      | 0.811524315 | 1.01E-08    |
| ENSG00000267761 | CTD-2130O13.1  | 0.952283134 | 0.000323093 | ENSG00000189377 | CXCL17    | 0.812337633 | 0.00052244  |
| ENSG00000227811 | FAM212B-AS1    | 0.952335533 | 0.000610928 | ENSG00000014257 | ACPP      | 0.812815508 | 0.019332244 |

|                 |                |             |             |                 |          |             |             |
|-----------------|----------------|-------------|-------------|-----------------|----------|-------------|-------------|
| ENSG00000270059 | RP11-88H12.2   | 0.952487061 | 0.00715295  | ENSG00000133641 | C12orf29 | 0.812880624 | 1.91E-09    |
| ENSG00000266985 | CTD-2329C7.2   | 0.952738451 | 0.004389484 | ENSG00000162433 | AK4      | 0.812964191 | 2.54E-05    |
| ENSG00000254438 | RP11-231N3.1   | 0.952778098 | 0.006828354 | ENSG00000107984 | DKK1     | 0.813098299 | 0.024631657 |
| ENSG00000253557 | RP11-1080G15.1 | 0.952872956 | 0.007520606 | ENSG00000180155 | LYNX1    | 0.813142088 | 3.38E-14    |
| ENSG00000267593 | RP11-108P20.4  | 0.952893193 | 0.003014585 | ENSG00000080822 | CLDND1   | 0.81317245  | 0.017069602 |
| ENSG00000238217 | AC093590.1     | 0.952919195 | 0.001842729 | ENSG00000175893 | ZDHHC21  | 0.813322936 | 1.22E-08    |
| ENSG00000233123 | LINC01007      | 0.952948134 | 0.001555032 | ENSG00000107960 | OBFC1    | 0.813393441 | 0.00030827  |
| ENSG00000267287 | RP11-567M16.1  | 0.953002882 | 0.000881575 | ENSG00000169228 | RAB24    | 0.813730125 | 1.30E-13    |
| ENSG00000270093 | AP000473.8     | 0.953074796 | 0.013028581 | ENSG00000184985 | SORCS2   | 0.813766263 | 2.35E-10    |
| ENSG00000258424 | RP11-471B22.2  | 0.953192259 | 0.031135717 | ENSG00000041353 | RAB27B   | 0.813800189 | 3.62E-06    |
| ENSG00000258279 | LINC00592      | 0.953236299 | 0.008604403 | ENSG00000184702 | 5-Sep    | 0.81389227  | 0.000409656 |
| ENSG00000255933 | RP11-495K9.5   | 0.953238438 | 0.000178011 | ENSG00000198074 | AKR1B10  | 0.814066926 | 0.001940002 |
| ENSG00000273387 | RP3-412A9.16   | 0.953238495 | 0.000495414 | ENSG00000100504 | PYGL     | 0.814105437 | 0.006345751 |
| ENSG00000196951 | RP11-425I13.3  | 0.953295033 | 0.000126146 | ENSG00000144063 | MALL     | 0.814160769 | 0.025627667 |
| ENSG00000236423 | LINC01134      | 0.953312516 | 1.89E-07    | ENSG00000122591 | FAM126A  | 0.814803081 | 2.18E-10    |
| ENSG00000196696 | PDXDC2P        | 0.953351692 | 0.006003662 | ENSG00000157379 | DHRS1    | 0.815007215 | 0.006311399 |
| ENSG00000246560 | RP11-10L12.4   | 0.953430994 | 0.016646157 | ENSG00000153294 | GPR115   | 0.815241918 | 2.58E-09    |
| ENSG00000261386 | CTD-2012K14.6  | 0.953554564 | 0.013813034 | ENSG00000142197 | DOPEY2   | 0.815464972 | 8.05E-08    |
| ENSG00000264920 | RP11-6N17.4    | 0.953603375 | 0.002175584 | ENSG00000187193 | MT1X     | 0.815509403 | 0.001802604 |
| ENSG00000182021 | RP11-381O7.3   | 0.95364298  | 0.002317363 | ENSG00000134058 | CDK7     | 0.816038083 | 3.64E-14    |
| ENSG00000251455 | RP11-164P12.3  | 0.953653374 | 0.00185011  | ENSG00000166592 | RRAD     | 0.816125145 | 0.00374016  |
| ENSG00000230928 | RP11-34A14.3   | 0.953669556 | 0.001318644 | ENSG00000114405 | C3orf14  | 0.816398069 | 0.006503133 |
| ENSG00000251538 | RP11-166A12.1  | 0.953758019 | 0.010176373 | ENSG00000175183 | CSRP2    | 0.816407186 | 0.006499075 |
| ENSG00000272942 | CTA-246H3.12   | 0.95394876  | 0.002491125 | ENSG00000147852 | VLDLR    | 0.816588793 | 0.000285232 |
| ENSG00000253521 | HPYR1          | 0.954001208 | 0.00249046  | ENSG00000130818 | ZNF426   | 0.816693548 | 0.00202478  |
| ENSG00000228135 | AC073128.10    | 0.954171715 | 0.004920249 | ENSG00000176945 | MUC20    | 0.816908591 | 0.000239804 |
| ENSG00000248505 | RP11-319E12.1  | 0.954181968 | 0.004147827 | ENSG00000143797 | MBOAT2   | 0.816928689 | 3.78E-12    |
| ENSG00000271409 | RP11-432J9.3   | 0.954204887 | 0.005506769 | ENSG00000182636 | NDN      | 0.816957259 | 3.68E-10    |
| ENSG00000261260 | CTD-2520I13.1  | 0.954257508 | 0.00182548  | ENSG00000114166 | KAT2B    | 0.81706193  | 0.009721455 |
| ENSG00000261442 | RP11-709D24.6  | 0.954468844 | 0.018939545 | ENSG00000147036 | LANCL3   | 0.817361248 | 1.19E-07    |
| ENSG00000263050 | RP11-667K14.3  | 0.954958893 | 0.000584757 | ENSG00000163032 | VSNL1    | 0.81742606  | 0.002415356 |
| ENSG00000268189 | AC005785.2     | 0.954981829 | 0.009825982 | ENSG00000138670 | RASGEF1B | 0.817663931 | 1.91E-06    |
| ENSG00000260785 | CASC17         | 0.954990934 | 0.018648151 | ENSG00000196218 | RYR1     | 0.818112672 | 0.002087183 |
| ENSG00000255847 | RP11-167N4.2   | 0.95501818  | 0.009244048 | ENSG00000155761 | SPAG17   | 0.818479647 | 1.61E-11    |
| ENSG00000125804 | FAM182A        | 0.955067501 | 0.043677876 | ENSG00000136653 | RASSF5   | 0.818674333 | 1.90E-13    |
| ENSG00000228853 | NEGR1-IT1      | 0.955141569 | 0.003272026 | ENSG00000169299 | PGM2     | 0.818751508 | 3.40E-08    |
| ENSG00000259213 | CTD-2071N1.1   | 0.955293814 | 0.009662557 | ENSG00000137843 | PAK6     | 0.818860738 | 0.005754456 |
| ENSG00000263089 | RP11-166P13.4  | 0.955378163 | 0.041518883 | ENSG00000164070 | HSPA4L   | 0.819084754 | 0.014768113 |
| ENSG00000225498 | AC002064.5     | 0.955396701 | 5.51E-06    | ENSG00000079385 | CEACAM1  | 0.819262875 | 2.01E-07    |
| ENSG00000226009 | KCNIP2-AS1     | 0.955415646 | 0.026546487 | ENSG00000141682 | PMAIP1   | 0.819279495 | 9.56E-06    |
| ENSG00000225084 | AL450226.2     | 0.955429489 | 0.022100438 | ENSG00000090054 | SPTLC1   | 0.819506738 | 0.009569691 |
| ENSG00000267150 | RP11-411B10.2  | 0.955457033 | 0.010090131 | ENSG00000138678 | AGPAT9   | 0.819601996 | 0.000142147 |
| ENSG00000273172 | AC108004.2     | 0.955491551 | 0.005446668 | ENSG00000116133 | DHCR24   | 0.819740928 | 3.01E-09    |
| ENSG00000232044 | LINC01105      | 0.95550036  | 0.001771992 | ENSG00000134444 | KIAA1468 | 0.819745536 | 9.07E-10    |
| ENSG00000261319 | RP11-279O17.1  | 0.955512102 | 0.000748005 | ENSG00000174500 | GCSAM    | 0.819821155 | 3.68E-11    |
| ENSG00000229180 | GS1-124K5.11   | 0.955605092 | 3.15E-05    | ENSG00000175785 | PRIMA1   | 0.82024594  | 1.55E-05    |
| ENSG00000231883 | RP1-297M16.2   | 0.95575295  | 0.005108478 | ENSG00000198643 | FAM3D    | 0.820268068 | 0.00020087  |

|                 |                |             |             |                 |          |             |             |
|-----------------|----------------|-------------|-------------|-----------------|----------|-------------|-------------|
| ENSG00000229533 | AC003986.5     | 0.95581648  | 0.002644583 | ENSG00000182795 | C1orf116 | 0.820334896 | 7.63E-12    |
| ENSG00000237468 | RP11-715G15.1  | 0.956030932 | 0.000559852 | ENSG00000109189 | USP46    | 0.820846666 | 0.01240561  |
| ENSG00000261275 | RP11-760D2.11  | 0.95614785  | 0.00090492  | ENSG00000163629 | PTPN13   | 0.821422374 | 0.023194211 |
| ENSG00000237119 | LINC01056      | 0.956197545 | 0.000208632 | ENSG00000116005 | PCYOX1   | 0.822178018 | 0.041317617 |
| ENSG00000224750 | RP11-94M14.2   | 0.956205669 | 0.00830822  | ENSG00000244734 | HBB      | 0.822354819 | 5.79E-05    |
| ENSG00000205885 | C1RL-AS1       | 0.956312734 | 0.00115652  | ENSG00000179477 | ALOX12B  | 0.8224117   | 0.00046197  |
| ENSG00000227375 | DLG1-AS1       | 0.956367882 | 0.003914294 | ENSG00000162738 | VANGL2   | 0.822744852 | 5.03E-06    |
| ENSG00000260262 | RP11-440L14.3  | 0.956394519 | 0.000394805 | ENSG00000102359 | SRPX2    | 0.822890079 | 0.012070392 |
| ENSG00000231674 | LINC00410      | 0.956536513 | 0.043491004 | ENSG00000143502 | SUSD4    | 0.822897475 | 0.00026478  |
| ENSG00000247735 | CTD-2574D22.2  | 0.956581131 | 0.012539261 | ENSG00000134215 | VAV3     | 0.82410834  | 0.017307628 |
| ENSG00000235026 | DPP10-AS1      | 0.956620748 | 0.027432161 | ENSG00000163687 | DNASE1L3 | 0.824217486 | 0.021130051 |
| ENSG00000265246 | RP11-663N22.1  | 0.956621708 | 0.031103196 | ENSG00000188042 | ARL4C    | 0.824317957 | 3.51E-10    |
| ENSG00000259985 | RP11-549B18.1  | 0.956645041 | 0.003624941 | ENSG00000167769 | ACER1    | 0.8244441   | 2.51E-07    |
| ENSG00000204250 | LINC00587      | 0.956653302 | 0.002498815 | ENSG00000136279 | DBNL     | 0.824665279 | 4.21E-12    |
| ENSG00000266171 | RP11-769O8.1   | 0.956703076 | 0.004044699 | ENSG00000180871 | CXCR2    | 0.82501444  | 0.008670073 |
| ENSG00000227468 | AL928742.12    | 0.956763899 | 0.000243623 | ENSG00000133048 | CHI3L1   | 0.825909169 | 0.002997743 |
| ENSG00000180139 | ACTA2-AS1      | 0.956835183 | 0.008361053 | ENSG00000118308 | LRMP     | 0.825954673 | 0.00386085  |
| ENSG00000268912 | CTD-2619J13.17 | 0.956905791 | 0.007023678 | ENSG00000119457 | SLC46A2  | 0.826085256 | 1.87E-09    |
| ENSG00000226754 | RP5-1024G6.5   | 0.957091753 | 0.030043568 | ENSG00000214860 | EVPLL    | 0.826523609 | 1.75E-15    |
| ENSG00000212766 | LINC00277      | 0.957098755 | 0.001228712 | ENSG00000100592 | DAAM1    | 0.827287879 | 5.58E-10    |
| ENSG00000224165 | DNAJC27-AS1    | 0.957156452 | 0.007199334 | ENSG00000198934 | MAGEE1   | 0.827376648 | 5.41E-09    |
| ENSG00000183242 | WT1-AS         | 0.957202609 | 0.013617477 | ENSG00000134755 | DSC2     | 0.827478788 | 0.048259188 |
| ENSG00000235154 | CTA-280A3__B.2 | 0.957216692 | 0.001608784 | ENSG00000165795 | NDRG2    | 0.827801918 | 9.74E-05    |
| ENSG00000267858 | AC016629.8     | 0.957307305 | 0.016409767 | ENSG00000079156 | OSBPL6   | 0.82783849  | 6.11E-07    |
| ENSG00000237037 | NDUFA6-AS1     | 0.957315583 | 0.000559485 | ENSG00000104447 | TRPS1    | 0.827878343 | 0.013860383 |
| ENSG00000233093 | LINC00892      | 0.957334597 | 0.003321469 | ENSG00000008311 | AASS     | 0.828021547 | 8.50E-07    |
| ENSG00000235710 | RP5-1097F14.3  | 0.957390305 | 0.007354886 | ENSG00000106733 | NMRK1    | 0.828292498 | 0.004927485 |
| ENSG00000255240 | RP11-142C4.6   | 0.957468936 | 0.00152155  | ENSG00000189369 | GSPT2    | 0.82843472  | 0.000482741 |
| ENSG00000234722 | AC073236.3     | 0.957488192 | 0.004200272 | ENSG00000096968 | JAK2     | 0.828554504 | 3.64E-07    |
| ENSG00000225733 | FGD5-AS1       | 0.957535718 | 0.016782769 | ENSG00000169991 | IFFO2    | 0.828952182 | 6.38E-07    |
| ENSG00000229565 | AC108056.1     | 0.957576783 | 6.38E-05    | ENSG00000141401 | IMPA2    | 0.829088583 | 0.00468657  |
| ENSG00000253408 | RP11-231D20.2  | 0.957690271 | 0.017840279 | ENSG00000150045 | KLRF1    | 0.829109531 | 3.00E-06    |
| ENSG00000253608 | RP11-770E5.1   | 0.957710949 | 0.017799427 | ENSG00000176845 | METRNL   | 0.829319154 | 6.49E-09    |
| ENSG00000260930 | RP11-214L13.1  | 0.957712996 | 0.00518935  | ENSG00000132388 | UBE2G1   | 0.829387463 | 0.00027707  |
| ENSG00000249532 | MIR302B        | 0.957728523 | 0.000793789 | ENSG00000103034 | NDRG4    | 0.829419755 | 0.001048478 |
| ENSG00000236262 | SHANK2-AS2     | 0.957749275 | 0.00134964  | ENSG00000180776 | ZDHHC20  | 0.82975061  | 0.000281136 |
| ENSG00000223907 | RP11-439L8.4   | 0.957755426 | 0.00063785  | ENSG00000129451 | KLK10    | 0.830258825 | 0.020100404 |
| ENSG00000235749 | RP11-634B7.4   | 0.957931001 | 0.010998539 | ENSG00000088726 | TMEM40   | 0.830477374 | 0.002816376 |
| ENSG00000255428 | RP11-794P6.1   | 0.958000166 | 0.018157931 | ENSG00000178172 | SPINK6   | 0.830529656 | 0.000625537 |
| ENSG00000233355 | CHRM3-AS2      | 0.958099935 | 0.042524803 | ENSG00000134107 | BHLHE40  | 0.830612434 | 3.89E-08    |
| ENSG00000235601 | RP11-231K24.2  | 0.958109774 | 0.000577472 | ENSG00000127688 | GAN      | 0.83098646  | 2.07E-05    |
| ENSG00000253563 | NKX2-1-AS1     | 0.958145161 | 0.004737334 | ENSG00000134996 | OSTF1    | 0.83103646  | 0.002018797 |
| ENSG00000262801 | U91319.1       | 0.958238103 | 0.004458173 | ENSG00000127252 | HRASLS   | 0.83149286  | 0.000185168 |
| ENSG00000225783 | MIAT           | 0.958243136 | 0.006606816 | ENSG00000165156 | ZHX1     | 0.831743077 | 1.83E-07    |
| ENSG00000227908 | CTD-2031P19.3  | 0.958264365 | 0.007976535 | ENSG00000090661 | CERS4    | 0.831904118 | 7.57E-05    |
| ENSG00000225285 | RP4-758J18.10  | 0.958332506 | 0.014037239 | ENSG00000198142 | SOWAHC   | 0.831962025 | 9.13E-10    |
| ENSG00000253311 | AC011343.1     | 0.958347749 | 0.00116494  | ENSG00000074410 | CA12     | 0.832138609 | 0.005844681 |

|                 |               |             |             |                 |           |             |             |
|-----------------|---------------|-------------|-------------|-----------------|-----------|-------------|-------------|
| ENSG00000236332 | AP001605.4    | 0.958394951 | 0.005449266 | ENSG00000132698 | RAB25     | 0.832141503 | 1.55E-12    |
| ENSG00000268108 | CTB-60B18.12  | 0.958398449 | 0.001894712 | ENSG00000178750 | STX19     | 0.83219916  | 8.05E-09    |
| ENSG00000249700 | SRD5A3-AS1    | 0.958398464 | 0.006783743 | ENSG00000006059 | KRT33A    | 0.832251202 | 0.000201849 |
| ENSG00000255322 | RP11-22P4.1   | 0.958465961 | 0.012224081 | ENSG00000177627 | C12orf54  | 0.832363442 | 1.91E-09    |
| ENSG00000228141 | AC105339.1    | 0.958517197 | 0.029693691 | ENSG00000102886 | GDPD3     | 0.832693241 | 0.015121235 |
| ENSG00000272940 | CTA-384D8.33  | 0.958519613 | 0.001481998 | ENSG00000087842 | PIR       | 0.832823679 | 0.000556792 |
| ENSG00000256862 | RP11-664D1.1  | 0.958711932 | 0.029718189 | ENSG00000058063 | ATP11B    | 0.832826635 | 3.03E-09    |
| ENSG00000261057 | LINC00555     | 0.958740584 | 0.018906923 | ENSG00000109062 | SLC9A3R1  | 0.832920853 | 1.23E-13    |
| ENSG00000261097 | LINC00563     | 0.958743602 | 0.001931563 | ENSG00000156413 | FUT6      | 0.833551742 | 0.020715646 |
| ENSG00000254139 | CTD-2339F6.1  | 0.958760449 | 0.001248568 | ENSG00000159263 | SIM2      | 0.833644222 | 1.78E-08    |
| ENSG00000260597 | AC012531.25   | 0.958987969 | 0.029483186 | ENSG00000021355 | SERPINB1  | 0.833951889 | 1.15E-11    |
| ENSG00000214146 | RP11-699L21.1 | 0.958989445 | 0.008713476 | ENSG00000108932 | SLC16A6   | 0.834032594 | 0.007423379 |
| ENSG00000235033 | RP11-611I3.3  | 0.95901969  | 0.009733111 | ENSG00000141337 | ARSG      | 0.834141424 | 1.13E-06    |
| ENSG00000225889 | AC074289.1    | 0.959218869 | 0.003203279 | ENSG00000115884 | SDC1      | 0.834151119 | 7.36E-14    |
| ENSG00000224812 | TMEM72-AS1    | 0.959354171 | 0.00721317  | ENSG00000138411 | HECW2     | 0.8341788   | 1.20E-07    |
| ENSG00000230612 | AC004237.1    | 0.959387685 | 0.038213988 | ENSG00000180438 | TPRXL     | 0.83430692  | 8.62E-09    |
| ENSG00000260457 | RP11-723G8.1  | 0.959442933 | 0.007685363 | ENSG00000198961 | PJA2      | 0.834838432 | 2.15E-10    |
| ENSG00000231983 | LINC00415     | 0.959453575 | 0.002245929 | ENSG00000152766 | ANKRD22   | 0.835324638 | 5.88E-07    |
| ENSG00000259831 | LINC00567     | 0.959468693 | 0.003378258 | ENSG00000167653 | PSCA      | 0.835357681 | 0.020204489 |
| ENSG00000196273 | LINC00523     | 0.959565504 | 9.07E-05    | ENSG00000213064 | SFT2D2    | 0.83561333  | 6.65E-12    |
| ENSG00000229951 | AC104695.3    | 0.959567181 | 0.015003538 | ENSG00000104881 | PPP1R13L  | 0.835763495 | 0.009354498 |
| ENSG00000267254 | CTD-2162K18.5 | 0.959600405 | 0.035961066 | ENSG00000154265 | ABCA5     | 0.835846468 | 3.53E-05    |
| ENSG00000249917 | LINC00536     | 0.95960065  | 0.00201736  | ENSG00000154655 | L3MBTL4   | 0.836010819 | 1.46E-10    |
| ENSG00000272874 | RP5-1103G7.10 | 0.959606893 | 0.001960012 | ENSG00000140279 | DUOX2     | 0.836219023 | 0.013847342 |
| ENSG00000225488 | RP11-760D2.1  | 0.959697512 | 0.000469583 | ENSG00000005469 | CROT      | 0.836629105 | 1.58E-05    |
| ENSG00000269834 | CTD-3018O17.3 | 0.959704478 | 0.045688484 | ENSG00000187720 | THSD4     | 0.836707141 | 0.002542733 |
| ENSG00000261856 | CTD-2135D7.4  | 0.959782506 | 0.000183682 | ENSG00000105835 | NAMPT     | 0.836727271 | 1.79E-07    |
| ENSG00000271743 | CTD-2541M15.3 | 0.959818018 | 2.47E-06    | ENSG00000118402 | ELOVL4    | 0.836787125 | 0.010363505 |
| ENSG00000260629 | CTD-2643I7.1  | 0.959871825 | 0.006874046 | ENSG00000124942 | AHNAK     | 0.836911171 | 0.001750301 |
| ENSG00000239653 | PSMD6-AS2     | 0.959927044 | 0.034319505 | ENSG00000111726 | CMAS      | 0.837097024 | 0.010137633 |
| ENSG00000254008 | LINC00051     | 0.959983776 | 0.001895798 | ENSG00000205221 | VIT       | 0.83723388  | 4.61E-08    |
| ENSG00000261749 | RP11-152O14.1 | 0.959992894 | 0.008342222 | ENSG00000108352 | RAPGEFL1  | 0.837253487 | 0.018072506 |
| ENSG00000188971 | RP11-427H3.3  | 0.960025626 | 0.020894565 | ENSG00000178075 | GRAMD1C   | 0.837475179 | 2.29E-06    |
| ENSG00000261030 | RP11-791M20.1 | 0.960094716 | 0.002717891 | ENSG00000102383 | ZDHHC15   | 0.837533383 | 1.31E-06    |
| ENSG00000180910 | TTYT11        | 0.960101599 | 0.011711902 | ENSG00000175287 | PHYHD1    | 0.837851243 | 2.67E-08    |
| ENSG00000237232 | ZNF295-AS1    | 0.960134899 | 0.0264491   | ENSG00000168140 | VASN      | 0.838443545 | 1.16E-06    |
| ENSG00000237928 | RP4-668G5.1   | 0.960169087 | 0.011320617 | ENSG00000128965 | CHAC1     | 0.838545604 | 8.87E-07    |
| ENSG00000126005 | MMP24-AS1     | 0.960186633 | 0.045316359 | ENSG00000168824 | NSG1      | 0.839538154 | 0.001888089 |
| ENSG00000267702 | RP11-53B2.2   | 0.960222453 | 0.019517062 | ENSG00000156671 | SAMD8     | 0.84065101  | 3.58E-06    |
| ENSG00000247317 | RP11-273G15.2 | 0.960290584 | 0.018689436 | ENSG00000140199 | SLC12A6   | 0.840666568 | 0.000550317 |
| ENSG00000226706 | RP11-426A6.5  | 0.960302607 | 0.00860622  | ENSG00000136874 | STX17     | 0.840681963 | 2.04E-14    |
| ENSG00000237048 | TTYT12        | 0.960396964 | 0.00234756  | ENSG00000006747 | SCIN      | 0.841125905 | 9.12E-06    |
| ENSG00000267808 | AC018755.17   | 0.960402228 | 0.006136859 | ENSG00000129455 | KLK8      | 0.841178574 | 0.012031366 |
| ENSG00000238273 | AC012360.6    | 0.960447677 | 0.030169888 | ENSG00000150593 | PDCD4     | 0.84125166  | 0.00497245  |
| ENSG00000233746 | LINC00656     | 0.960464296 | 0.010205559 | ENSG00000138642 | HERC6     | 0.841299396 | 0.000373749 |
| ENSG00000266947 | RP11-799D4.4  | 0.960500266 | 0.002113503 | ENSG00000143079 | CTTNBP2NL | 0.841392454 | 3.62E-11    |
| ENSG00000225028 | RP11-330M19.1 | 0.960533816 | 0.00208068  | ENSG00000142627 | EPHA2     | 0.841432941 | 9.59E-08    |

|                 |                 |             |             |                 |         |             |             |
|-----------------|-----------------|-------------|-------------|-----------------|---------|-------------|-------------|
| ENSG00000260065 | CTA-445C9.15    | 0.960546366 | 0.041526864 | ENSG00000134873 | CLDN10  | 0.841615929 | 0.004431783 |
| ENSG00000266053 | RP11-143J12.2   | 0.96061764  | 0.048755105 | ENSG00000175591 | P2RY2   | 0.841757031 | 0.006375688 |
| ENSG00000260857 | RP11-80F22.15   | 0.960652602 | 0.037416012 | ENSG00000103257 | SLC7A5  | 0.841800525 | 5.25E-07    |
| ENSG00000261971 | RP11-473M20.7   | 0.960679976 | 4.12E-05    | ENSG00000167207 | NOD2    | 0.841816773 | 0.006424957 |
| ENSG00000259540 | RP11-526I2.1    | 0.960711606 | 0.034949695 | ENSG00000162783 | IER5    | 0.84199489  | 0.014569405 |
| ENSG00000258573 | RP11-14J7.6     | 0.960724304 | 0.006388964 | ENSG00000188786 | MTF1    | 0.842143766 | 3.75E-15    |
| ENSG00000259476 | RP11-50C13.2    | 0.960810051 | 0.00803324  | ENSG00000144057 | ST6GAL2 | 0.842204712 | 4.39E-07    |
| ENSG00000261305 | RP4-584D14.7    | 0.960848202 | 0.00026914  | ENSG00000162069 | CCDC64B | 0.842221364 | 2.60E-09    |
| ENSG00000241163 | LINC00877       | 0.960848374 | 0.024788568 | ENSG00000027075 | PRKCH   | 0.842534023 | 0.004480497 |
| ENSG00000233639 | LINC01158       | 0.960913324 | 0.005451963 | ENSG00000110429 | FBXO3   | 0.842743125 | 0.012735891 |
| ENSG00000228560 | RP11-550P17.5   | 0.961011614 | 0.000737294 | ENSG00000018189 | RUFY3   | 0.842761653 | 7.59E-10    |
| ENSG00000260416 | RP5-963E22.5    | 0.961177651 | 0.000507847 | ENSG00000107864 | CPEB3   | 0.842772043 | 0.013574539 |
| ENSG00000235453 | TOPORS-AS1      | 0.961251407 | 0.008109147 | ENSG00000141279 | NPEPPS  | 0.842847688 | 0.001210865 |
| ENSG00000258066 | RP11-781A6.1    | 0.961333731 | 0.004027667 | ENSG00000100842 | EFS     | 0.842910889 | 0.000227491 |
| ENSG00000261745 | RP11-506E9.3    | 0.961406083 | 0.008231589 | ENSG00000072210 | ALDH3A2 | 0.842957699 | 0.001114613 |
| ENSG00000259426 | RP11-253M7.1    | 0.961449706 | 0.034984118 | ENSG00000176986 | SEC24C  | 0.843008455 | 1.41E-10    |
| ENSG00000257259 | RP11-767I20.1   | 0.961469528 | 0.019564302 | ENSG00000187079 | TEAD1   | 0.843166392 | 1.39E-10    |
| ENSG00000250062 | RP11-778J15.1   | 0.961481354 | 3.18E-05    | ENSG00000172201 | ID4     | 0.843174455 | 0.005333278 |
| ENSG00000183822 | CTA-833B7.2     | 0.961514373 | 0.026971276 | ENSG00000168631 | DPCR1   | 0.84364308  | 0.037426955 |
| ENSG00000233153 | UBE2E2-AS1      | 0.961544877 | 0.003322001 | ENSG00000135476 | ESPL1   | 0.843741307 | 0.020842327 |
| ENSG00000267201 | AC005624.2      | 0.961549352 | 0.023023109 | ENSG00000029153 | ARNTL2  | 0.843864924 | 0.045591668 |
| ENSG00000228888 | RP4-764O22.2    | 0.961576795 | 0.018160704 | ENSG00000000003 | TSPAN6  | 0.843867303 | 0.028758966 |
| ENSG00000233077 | RP11-290F20.2   | 0.961676528 | 0.010102022 | ENSG00000164086 | DUSP7   | 0.844199097 | 0.002945515 |
| ENSG00000179141 | MTUS2-AS1       | 0.961728192 | 0.006367392 | ENSG00000198574 | SH2D1B  | 0.844464924 | 9.27E-08    |
| ENSG00000241211 | IQCJ-SCHIP1-AS1 | 0.961793731 | 0.002528868 | ENSG00000156463 | SH3RF2  | 0.844481252 | 1.56E-09    |
| ENSG00000226312 | CFLAR-AS1       | 0.961797984 | 0.016727124 | ENSG00000078747 | ITCH    | 0.844727597 | 0.006527147 |
| ENSG00000232655 | CTA-397C4.2     | 0.961811483 | 0.025975553 | ENSG00000111344 | RASAL1  | 0.844949941 | 0.005475552 |
| ENSG00000236901 | MIR600HG        | 0.961850504 | 0.038529882 | ENSG00000178573 | MAF     | 0.845096548 | 0.000511794 |
| ENSG00000243349 | RP11-445N18.7   | 0.961852385 | 0.002750262 | ENSG00000168268 | NT5DC2  | 0.845097288 | 0.007051055 |
| ENSG00000248576 | RP11-834C11.8   | 0.961855829 | 0.00674828  | ENSG00000103942 | HOMER2  | 0.845099166 | 0.001302506 |
| ENSG00000269376 | RP11-120K24.5   | 0.961917445 | 0.004535148 | ENSG00000161533 | ACOX1   | 0.84554253  | 4.50E-09    |
| ENSG00000186842 | LINC00846       | 0.961919155 | 0.043366102 | ENSG00000116191 | RALGPS2 | 0.84582529  | 1.17E-07    |
| ENSG00000266256 | LINC00683       | 0.961971171 | 0.036964742 | ENSG00000188643 | S100A16 | 0.845881001 | 1.83E-13    |
| ENSG00000249694 | RP11-378A12.1   | 0.962014756 | 0.02408237  | ENSG00000198060 | 5-Mar   | 0.846071472 | 0.001505448 |
| ENSG00000242687 | AC004893.11     | 0.962050824 | 0.01354598  | ENSG00000155066 | PROM2   | 0.846509831 | 8.00E-10    |
| ENSG00000257784 | RP11-630C16.1   | 0.96209545  | 0.026002633 | ENSG00000106278 | PTPRZ1  | 0.846588764 | 0.013476312 |
| ENSG00000236720 | RP11-63B19.1    | 0.962169351 | 0.008458266 | ENSG00000129194 | SOX15   | 0.846592452 | 0.0002987   |
| ENSG00000273210 | AP001437.1      | 0.962282242 | 0.036559928 | ENSG00000163412 | EIF4E3  | 0.846657776 | 1.42E-08    |
| ENSG00000262031 | RP11-63A1.2     | 0.962299914 | 0.005247954 | ENSG00000078018 | MAP2    | 0.846686109 | 2.34E-05    |
| ENSG00000223477 | LINC00842       | 0.962355799 | 0.003525187 | ENSG00000175634 | RPS6KB2 | 0.846790683 | 6.68E-06    |
| ENSG00000231976 | LINC00202-2     | 0.962411334 | 0.001311406 | ENSG00000196542 | SPTSSB  | 0.846854396 | 0.016504148 |
| ENSG00000261087 | KB-1460A1.5     | 0.962426248 | 0.013648665 | ENSG00000156030 | ELMSAN1 | 0.847155723 | 0.002129212 |
| ENSG00000238265 | LINC00317       | 0.962434145 | 0.005024884 | ENSG00000092148 | HECTD1  | 0.84717823  | 6.05E-09    |
| ENSG00000260979 | RP11-77H9.8     | 0.962446451 | 0.039907228 | ENSG00000135821 | GLUL    | 0.84750433  | 0.001134567 |
| ENSG00000261044 | AP006547.3      | 0.962518325 | 0.010698532 | ENSG00000137449 | CPEB2   | 0.848019649 | 1.77E-08    |
| ENSG00000226764 | AC010145.4      | 0.962532006 | 0.040015695 | ENSG00000113161 | HMGCR   | 0.848326485 | 2.35E-11    |
| ENSG00000223850 | MYCNUN          | 0.962557277 | 0.019191981 | ENSG00000151632 | AKR1C2  | 0.848360083 | 0.025895071 |

|                 |                |             |             |                 |          |             |             |
|-----------------|----------------|-------------|-------------|-----------------|----------|-------------|-------------|
| ENSG00000175164 | ABO            | 0.962606945 | 0.004827322 | ENSG00000166920 | C15orf48 | 0.848452188 | 4.05E-06    |
| ENSG00000214105 | CTD-2116F7.1   | 0.96263403  | 0.007884262 | ENSG00000166396 | SERPINB7 | 0.848755711 | 0.000183373 |
| ENSG00000267522 | CTD-2621117.6  | 0.962643283 | 0.00425159  | ENSG00000189221 | MAOA     | 0.848887461 | 3.09E-05    |
| ENSG00000256116 | RP11-783K16.14 | 0.962678525 | 0.029225528 | ENSG00000174132 | FAM174A  | 0.848959405 | 3.94E-12    |
| ENSG00000232520 | AC012507.3     | 0.962797309 | 0.048613484 | ENSG00000133678 | TMEM254  | 0.849199874 | 0.00037453  |
| ENSG00000266677 | RP11-258F1.1   | 0.962820611 | 0.004764795 | ENSG00000118515 | SGK1     | 0.84940377  | 1.64E-07    |
| ENSG00000255568 | BRWD1-IT2      | 0.962849921 | 0.012164216 | ENSG00000156284 | CLDN8    | 0.850117728 | 0.002762982 |
| ENSG00000234917 | RP5-994D16.3   | 0.962850147 | 0.002066907 | ENSG00000068078 | FGFR3    | 0.850319086 | 0.003204204 |
| ENSG00000265242 | RP11-649A18.7  | 0.962868187 | 0.041328132 | ENSG00000185100 | ADSSL1   | 0.85064228  | 0.000100267 |
| ENSG00000230091 | TMEM254-AS1    | 0.962895736 | 0.007390959 | ENSG00000122378 | FAM213A  | 0.850757753 | 5.56E-06    |
| ENSG00000223635 | RP4-613A2.1    | 0.962934916 | 0.008279435 | ENSG00000182809 | CRIP2    | 0.850810085 | 0.006152567 |
| ENSG00000259868 | RP11-1012E15.1 | 0.962941214 | 0.012615418 | ENSG00000177054 | ZDHHC13  | 0.850846014 | 8.90E-09    |
| ENSG00000189238 | LINC00943      | 0.963028005 | 0.019220171 | ENSG00000162852 | CNST     | 0.850919707 | 3.49E-06    |
| ENSG00000232837 | AF064858.7     | 0.963041635 | 0.002458877 | ENSG00000174738 | NR1D2    | 0.851194661 | 8.43E-07    |
| ENSG00000251175 | RP11-45L9.1    | 0.963226333 | 0.049377242 | ENSG00000168172 | HOOK3    | 0.851709564 | 3.11E-08    |
| ENSG00000231428 | LINC00396      | 0.963268218 | 0.000917325 | ENSG00000188641 | DPYD     | 0.85188637  | 2.98E-13    |
| ENSG00000251210 | RP11-168E17.1  | 0.963319663 | 0.018503433 | ENSG00000083817 | ZNF416   | 0.852240568 | 1.25E-06    |
| ENSG00000246214 | RP11-260E18.1  | 0.96341309  | 0.007271694 | ENSG00000124357 | NAGK     | 0.852299561 | 0.000732486 |
| ENSG00000236049 | AC104777.2     | 0.963475628 | 0.008662135 | ENSG00000157107 | FCHO2    | 0.852330412 | 4.47E-08    |
| ENSG00000251536 | RP11-572C21.1  | 0.963477154 | 0.003612144 | ENSG00000138135 | CH25H    | 0.852380429 | 0.000786001 |
| ENSG00000260937 | RP11-548M13.1  | 0.963535035 | 0.005719097 | ENSG00000184731 | FAM110C  | 0.852423368 | 5.79E-06    |
| ENSG00000267577 | CTD-2587H24.5  | 0.963583299 | 0.008304144 | ENSG00000179593 | ALOX15B  | 0.852604268 | 0.010955255 |
| ENSG00000230223 | ATXN8OS        | 0.963688882 | 0.032866174 | ENSG00000152661 | GJA1     | 0.852623521 | 0.026069349 |
| ENSG00000230910 | RP3-525N10.2   | 0.963797849 | 0.006356903 | ENSG00000168350 | DEGS2    | 0.852672979 | 1.11E-09    |
| ENSG00000206417 | H1FX-AS1       | 0.963805165 | 0.000507755 | ENSG00000157103 | SLC6A1   | 0.852712154 | 0.010382542 |
| ENSG00000223975 | AP001048.4     | 0.963828098 | 0.025284593 | ENSG00000102287 | GABRE    | 0.852819995 | 0.004245618 |
| ENSG00000229043 | AC091729.9     | 0.963872853 | 0.00466511  | ENSG00000166971 | AKTIP    | 0.852923933 | 0.001482797 |
| ENSG00000259697 | RP11-299H22.1  | 0.96394579  | 0.010038679 | ENSG00000188921 | PTPLAD2  | 0.852949649 | 0.002664792 |
| ENSG00000223764 | RP11-54O7.3    | 0.963988958 | 0.006746677 | ENSG00000267508 | ZNF285   | 0.853140212 | 0.001229632 |
| ENSG00000256494 | RP5-944M2.1    | 0.964025411 | 0.04046851  | ENSG00000175105 | ZNF654   | 0.853146814 | 1.90E-08    |
| ENSG00000260779 | RP11-856M7.1   | 0.964111673 | 0.001287731 | ENSG00000168209 | DDIT4    | 0.85315957  | 2.50E-07    |
| ENSG00000273013 | CTD-2002J20.1  | 0.964112213 | 0.034886599 | ENSG00000184363 | PKP3     | 0.853193314 | 4.39E-08    |
| ENSG00000239513 | RP11-2A4.3     | 0.964113204 | 0.00595236  | ENSG00000115008 | IL1A     | 0.853336336 | 0.034996245 |
| ENSG00000262133 | RP11-676J12.6  | 0.964121586 | 0.017116518 | ENSG00000185624 | P4HB     | 0.853438285 | 9.65E-08    |
| ENSG00000226944 | RP1-120G22.11  | 0.964161182 | 0.025998945 | ENSG00000198300 | PEG3     | 0.853536896 | 0.000488986 |
| ENSG00000233236 | AP001171.1     | 0.964169228 | 0.008778743 | ENSG00000213853 | EMP2     | 0.853575739 | 0.003873582 |
| ENSG00000273032 | DGCR9          | 0.964172185 | 0.002999004 | ENSG00000108091 | CCDC6    | 0.853631915 | 0.003207052 |
| ENSG00000255571 | LINC00925      | 0.964175434 | 0.020833623 | ENSG00000176055 | MBLAC2   | 0.853783808 | 8.25E-08    |
| ENSG00000230393 | AC092667.2     | 0.964193203 | 0.006880284 | ENSG00000087510 | TFAP2C   | 0.853862023 | 0.001079387 |
| ENSG00000261025 | RP11-84D1.2    | 0.964236332 | 0.002924297 | ENSG00000060140 | STYK1    | 0.853898826 | 0.000199366 |
| ENSG00000233061 | TTL7-IT1       | 0.964330126 | 0.016025932 | ENSG00000169252 | ADRB2    | 0.853958821 | 0.000100336 |
| ENSG00000224190 | RP11-442O18.2  | 0.964453422 | 0.008317454 | ENSG00000154856 | APCDD1   | 0.853968514 | 0.000435141 |
| ENSG00000260151 | RP11-748L13.6  | 0.964456812 | 0.003065331 | ENSG00000149809 | TM7SF2   | 0.854032495 | 0.004256102 |
| ENSG00000224100 | AP001630.5     | 0.964557327 | 0.017121752 | ENSG00000010278 | CD9      | 0.854034467 | 0.005047959 |
| ENSG00000205266 | AL353997.3     | 0.96472776  | 0.02035349  | ENSG00000155324 | GRAMD3   | 0.854050189 | 4.38E-06    |
| ENSG00000264515 | CTC-525D6.1    | 0.964787912 | 0.035106128 | ENSG00000114115 | RBP1     | 0.854193623 | 0.015170395 |
| ENSG00000259436 | CTC-378H22.2   | 0.964815736 | 0.005447609 | ENSG00000108179 | PPIF     | 0.854361368 | 4.20E-06    |

|                 |               |             |             |                 |          |             |             |
|-----------------|---------------|-------------|-------------|-----------------|----------|-------------|-------------|
| ENSG00000231373 | RP11-466A17.1 | 0.964835522 | 0.047869611 | ENSG00000203995 | ZYG11A   | 0.854575145 | 9.75E-06    |
| ENSG00000237290 | RP11-214L19.1 | 0.964911678 | 0.011045439 | ENSG00000177427 | MIEF2    | 0.854748169 | 6.80E-08    |
| ENSG00000267454 | ZNF582-AS1    | 0.964926502 | 0.00258668  | ENSG00000143126 | CELSR2   | 0.854854068 | 0.000986555 |
| ENSG00000203999 | RP11-290F20.1 | 0.964989874 | 0.008244475 | ENSG00000078114 | NEBL     | 0.854875509 | 0.015762266 |
| ENSG00000250033 | SLC7A11-AS1   | 0.965004202 | 0.016696626 | ENSG00000148341 | SH3GLB2  | 0.855172235 | 0.000662817 |
| ENSG00000254275 | RP11-89M16.1  | 0.965045428 | 0.000565565 | ENSG00000113396 | SLC27A6  | 0.855429045 | 0.047181673 |
| ENSG00000243795 | RP11-572M11.3 | 0.965124872 | 0.013674508 | ENSG00000131126 | TEX101   | 0.855807067 | 6.27E-08    |
| ENSG00000271155 | RP11-435O5.5  | 0.965147519 | 0.012188646 | ENSG00000120471 | TP53AIP1 | 0.855827142 | 0.002137196 |
| ENSG00000261738 | RP11-945C19.1 | 0.965154041 | 0.00818456  | ENSG00000143520 | FLG2     | 0.85619379  | 1.18E-05    |
| ENSG00000243319 | FGF14-IT1     | 0.965196144 | 0.003609467 | ENSG00000164253 | WDR41    | 0.856310027 | 1.37E-10    |
| ENSG00000272223 | RP1-20C7.6    | 0.965286822 | 0.049290303 | ENSG00000082146 | STRADB   | 0.856483095 | 1.23E-05    |
| ENSG00000271046 | RP11-138I18.2 | 0.965326208 | 0.031224773 | ENSG00000132970 | WASF3    | 0.856505653 | 0.004339543 |
| ENSG00000228925 | AC016722.4    | 0.965344808 | 0.02657964  | ENSG00000145113 | MUC4     | 0.85652322  | 0.025311527 |
| ENSG00000248222 | CTB-174D11.1  | 0.965380844 | 0.017061374 | ENSG00000184828 | ZBTB7C   | 0.856665706 | 0.003177123 |
| ENSG00000272944 | CTD-2308L22.1 | 0.965477144 | 0.011093544 | ENSG00000141622 | RNF165   | 0.8566786   | 6.81E-12    |
| ENSG00000245598 | DACT3-AS1     | 0.965481337 | 0.001469381 | ENSG00000134955 | SLC37A2  | 0.856745851 | 1.74E-09    |
| ENSG00000230023 | RP11-10N16.2  | 0.965516384 | 0.014592238 | ENSG00000123700 | KCNJ2    | 0.85688782  | 0.00373283  |
| ENSG00000236230 | RP11-400N13.1 | 0.96554498  | 0.003451117 | ENSG00000135245 | HILPDA   | 0.857040594 | 0.038822332 |
| ENSG00000255020 | AF131216.5    | 0.965720946 | 0.028107832 | ENSG00000119862 | LGALSL   | 0.857227524 | 7.71E-09    |
| ENSG00000251011 | RP11-402L6.1  | 0.965728071 | 0.046070525 | ENSG00000163406 | SLC15A2  | 0.857398521 | 9.28E-05    |
| ENSG00000226249 | RP11-307P5.2  | 0.965737925 | 0.015190147 | ENSG00000185246 | PRPF39   | 0.857411227 | 4.00E-06    |
| ENSG00000231290 | APCDD1L-AS1   | 0.965914313 | 0.000671084 | ENSG00000183060 | LYSMD4   | 0.857998405 | 1.04E-06    |
| ENSG00000232998 | VPS13A-AS1    | 0.965921359 | 0.025622368 | ENSG00000146950 | SHROOM2  | 0.858066952 | 0.002898291 |
| ENSG00000241409 | AC064852.4    | 0.965931234 | 0.006981563 | ENSG00000183049 | CAMK1D   | 0.858109403 | 9.24E-05    |
| ENSG00000233316 | DSCR10        | 0.965948521 | 0.011501558 | ENSG00000167741 | GGT6     | 0.85814726  | 0.003133575 |
| ENSG00000267339 | LINC00906     | 0.965962698 | 0.0016286   | ENSG00000073921 | PICALM   | 0.858265261 | 1.23E-09    |
| ENSG00000273015 | LINC00938     | 0.965970861 | 0.021661145 | ENSG00000117595 | IRF6     | 0.858316701 | 8.51E-12    |
| ENSG00000226891 | RP11-182I10.3 | 0.965974082 | 0.038852537 | ENSG00000112309 | B3GAT2   | 0.858398407 | 0.000294747 |
| ENSG00000237149 | ZNF503-AS2    | 0.966004755 | 0.019474598 | ENSG00000085719 | CPNE3    | 0.85876413  | 3.53E-09    |
| ENSG00000232100 | RP11-152L7.2  | 0.966007089 | 0.005496315 | ENSG00000003402 | CFLAR    | 0.859067159 | 1.69E-12    |
| ENSG00000229720 | RP3-495K2.2   | 0.966039203 | 0.003153274 | ENSG00000070367 | EXOC5    | 0.859213331 | 0.035471748 |
| ENSG00000224863 | RP5-1109J22.2 | 0.96609401  | 0.032601374 | ENSG00000164342 | TLR3     | 0.859284896 | 0.000514167 |
| ENSG00000239205 | RP11-747D18.1 | 0.966106897 | 0.0276882   | ENSG00000139668 | WDFY2    | 0.859685299 | 1.24E-13    |
| ENSG00000230472 | RP1-28O17.1   | 0.96616116  | 0.040152283 | ENSG00000166046 | TCP11L2  | 0.859711577 | 3.89E-08    |
| ENSG00000189419 | SPATA41       | 0.966267663 | 0.01117084  | ENSG00000139289 | PHLDA1   | 0.85991342  | 0.014746194 |
| ENSG00000235304 | RP11-265P11.2 | 0.96636096  | 0.002585861 | ENSG00000159423 | ALDH4A1  | 0.859971722 | 0.0010374   |
| ENSG00000232537 | RP11-385M4.1  | 0.966449065 | 0.02175325  | ENSG00000117114 | LPHN2    | 0.85997352  | 0.007873368 |
| ENSG00000230319 | AL022476.2    | 0.966466928 | 0.01437741  | ENSG00000167644 | C19orf33 | 0.860092239 | 2.76E-05    |
| ENSG00000260193 | RP11-83N9.5   | 0.966478013 | 0.002657049 | ENSG00000112972 | HMGCS1   | 0.860115252 | 0.012497971 |
| ENSG00000250406 | RP13-539F13.3 | 0.966525525 | 0.004905667 | ENSG00000108590 | MED31    | 0.860184046 | 7.21E-12    |
| ENSG00000258701 | LINC00638     | 0.966547822 | 0.014825349 | ENSG00000105991 | HOXA1    | 0.860199377 | 0.002668813 |
| ENSG00000263624 | RP11-45M22.3  | 0.96657287  | 0.00397352  | ENSG00000197921 | HES5     | 0.860365009 | 1.03E-09    |
| ENSG00000245248 | USP2-AS1      | 0.966725093 | 0.030356957 | ENSG00000166681 | NGFRAP1  | 0.860420253 | 3.87E-05    |
| ENSG00000261627 | RP11-91I8.1   | 0.966787124 | 0.015114394 | ENSG00000172818 | OVOL1    | 0.860616013 | 0.004400152 |
| ENSG00000261013 | CTD-2050B12.1 | 0.966806027 | 0.007064854 | ENSG00000148672 | GLUD1    | 0.860766534 | 3.73E-13    |
| ENSG00000246863 | RP11-325N19.3 | 0.966941932 | 0.041142264 | ENSG00000172296 | SPTLC3   | 0.860838915 | 1.09E-05    |
| ENSG00000266709 | RP11-214O1.2  | 0.967077088 | 0.00398276  | ENSG00000137193 | PIM1     | 0.860936166 | 0.008096411 |

|                 |               |             |             |                 |          |             |             |
|-----------------|---------------|-------------|-------------|-----------------|----------|-------------|-------------|
| ENSG00000261623 | RP11-189E14.4 | 0.967114181 | 0.04661635  | ENSG00000165794 | SLC39A2  | 0.860979329 | 0.002829608 |
| ENSG00000260377 | RP11-646E18.4 | 0.967141695 | 0.001991526 | ENSG00000139116 | KIF21A   | 0.861130006 | 4.91E-06    |
| ENSG00000264243 | RP11-6N17.1   | 0.967235347 | 0.00909029  | ENSG00000131015 | ULBP2    | 0.861164784 | 0.011282205 |
| ENSG00000235725 | AC007389.3    | 0.967308004 | 0.04414924  | ENSG00000196405 | EVL      | 0.861198889 | 2.09E-07    |
| ENSG00000266498 | RP11-45M22.5  | 0.96739052  | 0.023726409 | ENSG00000102349 | KLF8     | 0.861228333 | 0.000547797 |
| ENSG00000259914 | RP11-298D21.2 | 0.967415514 | 0.008293825 | ENSG00000100949 | RABGGTA  | 0.861319261 | 0.008361642 |
| ENSG00000231459 | LINC00032     | 0.96746426  | 0.006241847 | ENSG00000166532 | RIMKLB   | 0.861445539 | 9.10E-05    |
| ENSG00000234884 | CTA-407F11.8  | 0.967507299 | 0.006598938 | ENSG00000162616 | DNAJB4   | 0.861500172 | 1.36E-06    |
| ENSG00000226581 | RP11-340I6.8  | 0.967532716 | 0.027215055 | ENSG00000085433 | WDR47    | 0.861628524 | 0.006392345 |
| ENSG00000261462 | CTA-254O6.1   | 0.967558715 | 0.001484325 | ENSG00000112378 | PERP     | 0.861972555 | 0.004844574 |
| ENSG00000258399 | MEG8          | 0.967598375 | 0.044243364 | ENSG00000204977 | TRIM13   | 0.862153924 | 4.98E-05    |
| ENSG00000203643 | AC012456.3    | 0.967653051 | 0.02327598  | ENSG00000170871 | KIAA0232 | 0.862218618 | 2.20E-07    |
| ENSG00000180769 | WDFY3-AS2     | 0.967682968 | 0.005939975 | ENSG00000144036 | EXOC6B   | 0.862238742 | 7.83E-15    |
| ENSG00000232591 | RP5-1031D4.2  | 0.967748758 | 0.018315087 | ENSG00000139547 | RDH16    | 0.862268424 | 8.77E-05    |
| ENSG00000259462 | RP11-752G15.3 | 0.967772095 | 0.00807117  | ENSG00000070081 | NUCB2    | 0.862281268 | 5.03E-07    |
| ENSG00000255649 | RP11-502N13.2 | 0.967799748 | 0.006193708 | ENSG00000176194 | CIDEA    | 0.862586959 | 0.014284682 |
| ENSG00000233395 | LINC00841     | 0.967832596 | 0.032700932 | ENSG00000131037 | EPS8L1   | 0.862604905 | 0.039238192 |
| ENSG00000250250 | CTD-2350J17.1 | 0.967861476 | 0.010376882 | ENSG00000142733 | MAP3K6   | 0.862619941 | 0.003269783 |
| ENSG00000231638 | AC011738.4    | 0.967945897 | 0.010241958 | ENSG00000137752 | CASP1    | 0.862755611 | 0.000377754 |
| ENSG00000245768 | RP11-410D17.2 | 0.968036842 | 0.003358827 | ENSG00000136161 | RCBTB2   | 0.862931162 | 0.003455817 |
| ENSG00000251359 | WWC2-AS2      | 0.968069315 | 0.043381325 | ENSG00000188906 | LRRK2    | 0.863245778 | 2.08E-06    |
| ENSG00000254823 | RP11-109E10.1 | 0.968106023 | 0.027746523 | ENSG00000145916 | RMND5B   | 0.863273635 | 0.000461285 |
| ENSG00000261035 | RP11-151E14.1 | 0.968308992 | 0.006110167 | ENSG00000159166 | LAD1     | 0.863380772 | 1.30E-09    |
| ENSG00000229766 | RP5-971N18.3  | 0.96831222  | 0.011879425 | ENSG00000243317 | C7orf73  | 0.863542543 | 2.72E-07    |
| ENSG00000260761 | RP11-184E9.2  | 0.968369118 | 0.004634966 | ENSG00000161267 | BDH1     | 0.863547223 | 0.007248365 |
| ENSG00000261000 | RP11-534L20.5 | 0.968415044 | 0.018888728 | ENSG00000099797 | TECR     | 0.863567    | 0.01479774  |
| ENSG00000240549 | THOC7-AS1     | 0.968415273 | 0.009233864 | ENSG00000184564 | SLITRK6  | 0.863608851 | 0.018064304 |
| ENSG00000235455 | IQCF5-AS1     | 0.968533765 | 0.033472981 | ENSG00000089486 | CDIP1    | 0.863950399 | 1.93E-06    |
| ENSG00000259906 | RP11-932O9.4  | 0.968545232 | 0.013601399 | ENSG00000170899 | GSTA4    | 0.864048898 | 0.009184604 |
| ENSG00000272491 | RP5-1024N4.4  | 0.96858287  | 0.02469837  | ENSG00000140459 | CYP11A1  | 0.864179566 | 0.00044046  |
| ENSG00000237517 | DGCR5         | 0.968654877 | 0.004075055 | ENSG00000186889 | TMEM17   | 0.864373593 | 0.000225487 |
| ENSG00000235023 | AP001626.2    | 0.968712394 | 0.012353427 | ENSG00000165195 | PIGA     | 0.864415384 | 1.25E-06    |
| ENSG00000269984 | RP11-362K14.5 | 0.968726636 | 0.000254219 | ENSG00000099337 | KCNK6    | 0.864445939 | 9.10E-09    |
| ENSG00000256654 | RP11-429A20.4 | 0.96878824  | 0.016094252 | ENSG00000198130 | HIBCH    | 0.864781679 | 6.27E-15    |
| ENSG00000182586 | LINC00334     | 0.968837674 | 0.002707291 | ENSG00000181885 | CLDN7    | 0.864796949 | 1.19E-05    |
| ENSG00000257433 | RP1-197B17.3  | 0.968850857 | 0.012526129 | ENSG00000148429 | USP6NL   | 0.864831398 | 0.028417317 |
| ENSG00000250198 | RP11-143A12.3 | 0.968856366 | 0.007421735 | ENSG00000186522 | 10-Sep   | 0.865037511 | 0.034602278 |
| ENSG00000258754 | CTD-3049M7.1  | 0.968987353 | 0.007607542 | ENSG00000124374 | PAIP2B   | 0.865074033 | 0.000569324 |
| ENSG00000206113 | RP11-503N18.1 | 0.969030723 | 0.016046505 | ENSG00000145687 | SSBP2    | 0.865097813 | 0.006345235 |
| ENSG00000262292 | RP11-160E2.11 | 0.969045005 | 0.008384788 | ENSG00000104892 | KLC3     | 0.865278361 | 5.35E-10    |
| ENSG00000235914 | MACROD2-AS1   | 0.969071732 | 0.01156926  | ENSG00000117475 | BLZF1    | 0.865360021 | 5.25E-06    |
| ENSG00000258376 | RP4-647C14.2  | 0.969080407 | 0.049081042 | ENSG00000196616 | ADH1B    | 0.865412594 | 0.025486068 |
| ENSG00000231421 | AC006050.2    | 0.969114632 | 0.021402169 | ENSG00000172867 | KRT2     | 0.865635067 | 0.020190532 |
| ENSG00000235070 | AC068138.1    | 0.969131092 | 0.022968749 | ENSG00000136167 | LCP1     | 0.865696124 | 0.000485977 |
| ENSG00000264589 | MAPT-AS1      | 0.969141747 | 0.000957811 | ENSG00000111961 | SASH1    | 0.865823425 | 0.000160132 |
| ENSG00000273451 | RP4-569M23.4  | 0.969198811 | 0.030751851 | ENSG00000164506 | STXBP5   | 0.866176846 | 2.36E-05    |
| ENSG00000263201 | CTC-479C5.6   | 0.969223522 | 0.018096877 | ENSG00000122085 | MTERFD2  | 0.866228489 | 0.000934692 |

|                 |               |             |             |                 |           |             |             |
|-----------------|---------------|-------------|-------------|-----------------|-----------|-------------|-------------|
| ENSG00000236467 | RP11-443A13.5 | 0.969287779 | 0.022581855 | ENSG00000104067 | TJP1      | 0.866237345 | 0.000499805 |
| ENSG00000259251 | RP11-643M14.1 | 0.969378675 | 0.015418437 | ENSG00000196409 | ZNF658    | 0.866257223 | 0.000423295 |
| ENSG00000244926 | ALKBH3-AS1    | 0.969417763 | 0.007243162 | ENSG00000118640 | VAMP8     | 0.866275949 | 1.51E-11    |
| ENSG00000262319 | CTC-457L16.2  | 0.96943294  | 0.023309195 | ENSG00000198848 | CES1      | 0.866314308 | 0.002116336 |
| ENSG00000255043 | NAV2-AS5      | 0.969592922 | 0.031862695 | ENSG00000173083 | HPSE      | 0.866363556 | 9.50E-05    |
| ENSG00000228422 | LINC00687     | 0.969675591 | 0.025501859 | ENSG00000136636 | KCTD3     | 0.866629184 | 7.84E-05    |
| ENSG00000197558 | SSPO          | 0.969814611 | 0.024405151 | ENSG00000146007 | ZMAT2     | 0.866651482 | 8.52E-11    |
| ENSG00000249833 | RP11-71E19.5  | 0.969978586 | 0.00397822  | ENSG00000198399 | ITSN2     | 0.866740775 | 1.16E-09    |
| ENSG00000236834 | LINC00421     | 0.969988093 | 0.036121685 | ENSG00000145287 | PLAC8     | 0.866880758 | 0.004805556 |
| ENSG00000246090 | RP11-696N14.1 | 0.970074989 | 0.00010146  | ENSG00000145545 | SRD5A1    | 0.867043848 | 0.024734898 |
| ENSG00000268095 | CTC-429C10.2  | 0.970119033 | 0.012367776 | ENSG00000198894 | CIPC      | 0.867058853 | 1.04E-05    |
| ENSG00000260202 | RP3-333B15.4  | 0.97017401  | 0.01794549  | ENSG00000198561 | CTNND1    | 0.867176272 | 1.03E-16    |
| ENSG00000254703 | SENCR         | 0.970223529 | 0.037594847 | ENSG00000109670 | FBXW7     | 0.867270193 | 1.35E-13    |
| ENSG00000250392 | RP11-700N1.1  | 0.970246048 | 0.035405085 | ENSG00000125772 | GPCPD1    | 0.867293888 | 3.60E-06    |
| ENSG00000241954 | RP1-149A16.17 | 0.970278902 | 0.040125182 | ENSG00000130779 | CLIP1     | 0.867624235 | 0.011405198 |
| ENSG00000249873 | RP11-983C2.2  | 0.970365454 | 0.022222618 | ENSG00000168811 | IL12A     | 0.86766164  | 0.003918503 |
| ENSG00000234452 | RP11-168O10.6 | 0.97043257  | 0.013375983 | ENSG00000102189 | EEA1      | 0.868023622 | 5.45E-06    |
| ENSG00000257056 | RP11-966I7.2  | 0.970494584 | 0.039652806 | ENSG00000164746 | C7orf57   | 0.868046298 | 0.000114304 |
| ENSG00000204625 | HCG9          | 0.970558988 | 0.037126009 | ENSG00000158623 | COPG2     | 0.868104906 | 5.28E-06    |
| ENSG00000214145 | LINC00887     | 0.97056753  | 0.027475247 | ENSG00000141429 | GALNT1    | 0.868139246 | 5.73E-09    |
| ENSG00000229727 | AC013460.1    | 0.970630084 | 0.006250283 | ENSG00000074211 | PPP2R2C   | 0.86814749  | 3.64E-11    |
| ENSG00000259284 | RP11-162I7.1  | 0.970660023 | 0.02458635  | ENSG00000095303 | PTGS1     | 0.868289957 | 0.002474329 |
| ENSG00000260417 | CTD-2542L18.1 | 0.970813429 | 0.02346158  | ENSG00000138593 | SECISBP2L | 0.868496494 | 2.09E-08    |
| ENSG00000243224 | RP5-1157M23.2 | 0.970875039 | 0.022809892 | ENSG00000143819 | EPHX1     | 0.86873326  | 0.003337628 |
| ENSG00000203601 | LINC00970     | 0.970898246 | 0.003460337 | ENSG00000197124 | ZNF682    | 0.868794036 | 3.47E-07    |
| ENSG00000135253 | KCP           | 0.970922379 | 0.015128719 | ENSG00000094796 | KRT31     | 0.868958374 | 0.015149042 |
| ENSG00000236461 | RP11-523L1.2  | 0.971065613 | 0.015472282 | ENSG00000160703 | NLRX1     | 0.868981357 | 0.000554146 |
| ENSG00000256995 | RP11-114G22.1 | 0.971092603 | 0.024760628 | ENSG00000113580 | NR3C1     | 0.869141944 | 2.88E-06    |
| ENSG00000228536 | RP11-392O17.1 | 0.971111997 | 0.047508637 | ENSG00000175906 | ARL4D     | 0.869349507 | 0.000218056 |
| ENSG00000267872 | RP11-157B13.7 | 0.971164637 | 0.015539822 | ENSG00000106211 | HSPB1     | 0.869368258 | 0.006703195 |
| ENSG00000267466 | RP11-13K12.5  | 0.971180082 | 0.025832076 | ENSG00000156711 | MAPK13    | 0.8695634   | 5.25E-12    |
| ENSG00000241345 | RP4-630C24.3  | 0.971198044 | 0.011258969 | ENSG00000177791 | MYOZ1     | 0.869587176 | 2.84E-06    |
| ENSG00000180846 | CSNK1G2-AS1   | 0.971244417 | 0.016224596 | ENSG00000123178 | SPRYD7    | 0.869711399 | 3.73E-07    |
| ENSG00000230550 | RP11-74C13.3  | 0.971315472 | 0.025129234 | ENSG00000171124 | FUT3      | 0.869734845 | 4.06E-06    |
| ENSG00000262768 | RP11-353N14.1 | 0.97134287  | 0.020306563 | ENSG00000107566 | ERLIN1    | 0.869742859 | 1.71E-09    |
| ENSG00000186369 | LINC00643     | 0.971389775 | 0.034045518 | ENSG00000114450 | GNB4      | 0.869748885 | 1.79E-08    |
| ENSG00000243902 | RP1-63G5.5    | 0.971440105 | 0.024772757 | ENSG00000164142 | FAM160A1  | 0.869771238 | 2.04E-12    |
| ENSG00000272854 | RP4-593H12.1  | 0.97153055  | 0.020768744 | ENSG00000185008 | ROBO2     | 0.86977126  | 3.24E-05    |
| ENSG00000248265 | RP11-834C11.3 | 0.971586233 | 0.007345183 | ENSG00000121060 | TRIM25    | 0.869827465 | 2.11E-08    |
| ENSG00000267161 | AC005943.5    | 0.971612746 | 0.035923557 | ENSG00000170775 | GPR37     | 0.869857308 | 0.049796597 |
| ENSG00000235865 | GSN-AS1       | 0.971618849 | 0.01727388  | ENSG00000135842 | FAM129A   | 0.869968552 | 0.000249652 |
| ENSG00000230773 | AC079807.4    | 0.97163036  | 0.04868871  | ENSG00000101782 | RIOK3     | 0.869971708 | 1.30E-07    |
| ENSG00000231078 | RP11-560A15.4 | 0.971654438 | 0.035114182 | ENSG00000163249 | CCNYL1    | 0.87003065  | 0.000159047 |
| ENSG00000250632 | RP3-513G18.2  | 0.971676892 | 0.041838999 | ENSG00000038002 | AGA       | 0.870062275 | 0.000491455 |
| ENSG00000203808 | BVES-AS1      | 0.971701819 | 0.041474981 | ENSG00000104723 | TUSC3     | 0.870142897 | 1.71E-05    |
| ENSG00000233521 | RP5-1172A22.1 | 0.97188518  | 0.036879163 | ENSG00000069345 | DNAJA2    | 0.870567678 | 0.00073513  |
| ENSG00000259446 | RP11-489D6.2  | 0.971889305 | 0.015599117 | ENSG00000004059 | ARF5      | 0.87061401  | 5.46E-09    |

|                 |               |             |             |                 |          |             |             |
|-----------------|---------------|-------------|-------------|-----------------|----------|-------------|-------------|
| ENSG00000260060 | RP11-388M20.1 | 0.971914326 | 0.047591888 | ENSG00000105929 | ATP6V0A4 | 0.870682867 | 0.007105521 |
| ENSG00000267174 | CTC-510F12.4  | 0.971976607 | 0.009566411 | ENSG00000105355 | PLIN3    | 0.870758837 | 0.012930467 |
| ENSG00000233246 | RP11-415J8.5  | 0.972004877 | 0.03828112  | ENSG00000075651 | PLD1     | 0.870773082 | 0.001293397 |
| ENSG00000229373 | LINC00452     | 0.972006292 | 0.049574948 | ENSG00000037749 | MFAP3    | 0.870798693 | 1.48E-17    |
| ENSG00000235407 | RP11-470L19.2 | 0.97201495  | 0.018521767 | ENSG00000143443 | C1orf56  | 0.870931859 | 0.002206054 |
| ENSG00000235314 | LINC00957     | 0.97208485  | 0.006923902 | ENSG00000171236 | LRG1     | 0.871120411 | 0.000811546 |
| ENSG00000248809 | LINC01095     | 0.972181412 | 0.045854559 | ENSG00000116514 | RNF19B   | 0.871286376 | 3.33E-08    |
| ENSG00000260093 | RP11-1E4.1    | 0.97224924  | 0.04049359  | ENSG00000105750 | ZNF85    | 0.871302507 | 3.34E-07    |
| ENSG00000245651 | RP11-620J15.2 | 0.972252299 | 0.011641975 | ENSG00000104756 | KCTD9    | 0.871383844 | 4.43E-09    |
| ENSG00000251616 | RP11-485M7.3  | 0.972353379 | 0.041678814 | ENSG00000100030 | MAPK1    | 0.871803865 | 0.00015512  |
| ENSG00000267529 | RP11-53B2.1   | 0.972368489 | 0.010657428 | ENSG00000176842 | IRX5     | 0.87182139  | 0.016163961 |
| ENSG00000235834 | RP1-60N8.1    | 0.972442332 | 0.023171503 | ENSG00000084733 | RAB10    | 0.871835527 | 3.37E-13    |
| ENSG00000264660 | RP11-381P6.1  | 0.972447524 | 0.029345411 | ENSG00000096696 | DSP      | 0.87197547  | 4.07E-15    |
| ENSG00000254584 | RP1-17K7.2    | 0.972496541 | 0.009480156 | ENSG00000129317 | PUS7L    | 0.872100692 | 8.90E-07    |
| ENSG00000261039 | RP11-417E7.2  | 0.972559139 | 0.032306346 | ENSG00000148926 | ADM      | 0.872102674 | 6.50E-05    |
| ENSG00000261024 | GS1-279B7.1   | 0.97263902  | 0.019608368 | ENSG00000111817 | DSE      | 0.872228589 | 0.001696335 |
| ENSG00000248724 | NPHP3-AS1     | 0.972642509 | 0.015972928 | ENSG00000108950 | FAM20A   | 0.872229534 | 0.003072033 |
| ENSG00000241684 | ADAMTS9-AS2   | 0.9726946   | 0.046512962 | ENSG00000154719 | MRPL39   | 0.87237611  | 4.75E-05    |
| ENSG00000260059 | RP11-231E19.1 | 0.972718818 | 0.02038906  | ENSG00000127129 | EDN2     | 0.87239643  | 5.54E-07    |
| ENSG00000273142 | RP11-458F8.4  | 0.972728203 | 0.046662656 | ENSG00000082269 | FAM135A  | 0.872649826 | 2.08E-08    |
| ENSG00000237250 | RP11-193H5.1  | 0.972884937 | 0.011026555 | ENSG00000139324 | TMTC3    | 0.872754757 | 6.22E-06    |
| ENSG00000259530 | RP11-259A24.1 | 0.972969385 | 0.046178178 | ENSG00000089902 | RCOR1    | 0.873019498 | 8.88E-14    |
| ENSG00000254654 | AC068858.1    | 0.972974647 | 0.037351579 | ENSG00000055147 | FAM114A2 | 0.873150497 | 1.96E-08    |
| ENSG00000237605 | RP11-343H5.6  | 0.972993863 | 0.046623246 | ENSG00000051596 | THOC3    | 0.873209541 | 1.58E-07    |
| ENSG00000213994 | RP11-414H17.5 | 0.973001781 | 0.039005124 | ENSG00000138109 | CYP2C9   | 0.873243118 | 9.23E-06    |
| ENSG00000232548 | AC010744.1    | 0.973162804 | 0.017547545 | ENSG00000172831 | CES2     | 0.87324724  | 0.00016142  |
| ENSG00000204706 | MAMDC2-AS1    | 0.973240211 | 0.032722042 | ENSG00000211448 | DIO2     | 0.873328335 | 0.018754701 |
| ENSG00000248572 | EGFLAM-AS2    | 0.973301228 | 0.030928403 | ENSG00000173210 | ABLIM3   | 0.873331096 | 0.012730252 |
| ENSG00000235488 | JARID2-AS1    | 0.973330657 | 0.036913583 | ENSG00000178919 | FOXE1    | 0.873434451 | 0.017992198 |
| ENSG00000259107 | LINC00911     | 0.973350595 | 0.01531255  | ENSG00000235109 | ZSCAN31  | 0.873449691 | 0.000141832 |
| ENSG00000213904 | LIPE-AS1      | 0.973352636 | 0.023681292 | ENSG00000130649 | CYP2E1   | 0.873609259 | 0.015311818 |
| ENSG00000235202 | RP11-39H13.1  | 0.973415218 | 0.01078501  | ENSG00000100417 | PMM1     | 0.873655822 | 0.00257721  |
| ENSG00000224995 | RP5-991C6.3   | 0.973443598 | 0.046369752 | ENSG00000173418 | NAA20    | 0.873941317 | 2.09E-09    |
| ENSG00000260777 | CTD-2008P7.1  | 0.973571812 | 0.007733683 | ENSG00000180190 | TDRP     | 0.873941776 | 6.94E-09    |
| ENSG00000253643 | RP11-561E1.1  | 0.973588695 | 0.025046707 | ENSG00000171119 | NRTN     | 0.873973677 | 0.033282674 |
| ENSG00000261003 | RP1-140C12.2  | 0.973595932 | 0.019886115 | ENSG00000130340 | SNX9     | 0.87421868  | 4.00E-08    |
| ENSG00000227244 | LINC00845     | 0.973607436 | 0.009781902 | ENSG00000121957 | GPSM2    | 0.874297312 | 0.004089508 |
| ENSG00000260896 | RP11-314O13.1 | 0.973607719 | 0.008146624 | ENSG00000153976 | HS3ST3A1 | 0.874365228 | 0.003068687 |
| ENSG00000233208 | LINC00642     | 0.973618189 | 0.004473696 | ENSG00000078902 | TOLLIP   | 0.874457594 | 0.007839811 |
| ENSG00000225626 | C9orf135-AS1  | 0.973667319 | 0.016825788 | ENSG00000171503 | ETFDH    | 0.874509032 | 0.003091718 |
| ENSG00000226759 | DAB1-AS1      | 0.973808064 | 0.025453983 | ENSG00000183762 | KREMEN1  | 0.874662902 | 2.01E-15    |
| ENSG00000262999 | CTD-3088G3.6  | 0.973874857 | 0.005958781 | ENSG00000111291 | GPRC5D   | 0.87467399  | 7.41E-10    |
| ENSG00000246394 | RP11-386I8.6  | 0.973881529 | 0.012020282 | ENSG00000125430 | HS3ST3B1 | 0.874752788 | 2.41E-09    |
| ENSG00000273311 | DGCR11        | 0.973905834 | 0.020899611 | ENSG00000065618 | COL17A1  | 0.874796809 | 0.005991974 |
| ENSG00000259905 | PWRN1         | 0.973934886 | 0.001066734 | ENSG00000204681 | GABBR1   | 0.874862201 | 0.000102403 |
| ENSG00000260619 | RP11-775C24.3 | 0.973944855 | 0.022273115 | ENSG00000011638 | TMEM159  | 0.875084798 | 0.000393699 |
| ENSG00000258499 | RP11-862G15.2 | 0.974007216 | 0.047704176 | ENSG00000186687 | LYRM7    | 0.875155751 | 4.15E-07    |

|                 |               |             |             |                 |            |             |             |
|-----------------|---------------|-------------|-------------|-----------------|------------|-------------|-------------|
| ENSG00000257771 | RP11-70F11.8  | 0.974034149 | 0.039217069 | ENSG00000136536 | 7-Mar      | 0.875256283 | 0.044472288 |
| ENSG00000260997 | RP4-647J21.1  | 0.974062732 | 0.038848631 | ENSG00000139291 | TMEM19     | 0.875262683 | 5.37E-07    |
| ENSG00000237579 | RP11-324L3.1  | 0.97414781  | 0.043858879 | ENSG00000184678 | HIST2H2BE  | 0.875330706 | 0.002200074 |
| ENSG00000232274 | RP11-782C8.2  | 0.974419989 | 0.037639347 | ENSG00000186187 | ZNRF1      | 0.875479112 | 2.18E-08    |
| ENSG00000239219 | RP11-379K17.4 | 0.974509282 | 0.034469371 | ENSG00000124587 | PEX6       | 0.875683961 | 0.00342487  |
| ENSG00000226440 | RP11-506B6.6  | 0.974560959 | 0.018204836 | ENSG00000006432 | MAP3K9     | 0.875813394 | 0.020724993 |
| ENSG00000233800 | RP11-295G24.4 | 0.974649578 | 0.042827269 | ENSG00000268838 | AC027228.1 | 0.876108669 | 1.29E-09    |
| ENSG00000228044 | RP4-781K5.4   | 0.974680517 | 0.040693679 | ENSG00000155744 | FAM126B    | 0.876195009 | 3.18E-05    |
| ENSG00000258586 | RP5-1021I20.2 | 0.974697713 | 0.036607242 | ENSG00000173338 | KCNK7      | 0.876235983 | 0.012517403 |
| ENSG00000234877 | AC092660.1    | 0.974770413 | 0.038774401 | ENSG00000090013 | BLVRB      | 0.876267223 | 4.66E-08    |
| ENSG00000239589 | LINC00879     | 0.974829061 | 0.036745296 | ENSG00000164930 | FZD6       | 0.876278589 | 0.001338831 |
| ENSG00000260475 | RP11-85A1.3   | 0.975027763 | 0.046687935 | ENSG00000198346 | ZNF813     | 0.876372343 | 0.000406818 |
| ENSG00000234736 | FAM170B-AS1   | 0.975190641 | 0.027290119 | ENSG00000187239 | FNBP1      | 0.876414876 | 2.02E-05    |
| ENSG00000228391 | AC011995.3    | 0.975213997 | 0.014632983 | ENSG00000075399 | VPS9D1     | 0.876422567 | 1.76E-06    |
| ENSG00000259281 | CTD-2632K10.1 | 0.975344959 | 0.046989075 | ENSG00000128016 | ZFP36      | 0.876485184 | 5.64E-07    |
| ENSG00000224405 | LINC00572     | 0.975476577 | 0.00911522  | ENSG00000115129 | TP53I3     | 0.876683084 | 0.04420385  |
| ENSG00000233360 | Z83844.1      | 0.975485707 | 0.0351749   | ENSG00000130766 | SESN2      | 0.876823254 | 0.000175861 |
| ENSG00000264098 | CTD-2350C19.1 | 0.975550535 | 0.018437027 | ENSG00000197601 | FAR1       | 0.876865333 | 7.29E-07    |
| ENSG00000228189 | RP13-60M5.2   | 0.975552797 | 0.025756265 | ENSG00000184574 | LPAR5      | 0.876901676 | 2.28E-07    |
| ENSG00000228215 | RP11-541F9.2  | 0.975601474 | 0.027493389 | ENSG00000173451 | THAP2      | 0.877090177 | 2.93E-05    |
| ENSG00000233968 | RP11-354E11.2 | 0.975622564 | 0.0214329   | ENSG00000146233 | CYP39A1    | 0.877131423 | 0.000973997 |
| ENSG00000243197 | TUSC7         | 0.975936954 | 0.035500608 | ENSG00000166145 | SPINT1     | 0.877134796 | 2.72E-08    |
| ENSG00000267244 | CTB-31O20.4   | 0.976135126 | 0.047529925 | ENSG00000173898 | SPTBN2     | 0.877517664 | 0.003819097 |
| ENSG00000223403 | MEG9          | 0.976229798 | 0.034266893 | ENSG00000205423 | CNEP1R1    | 0.877583554 | 9.68E-13    |
| ENSG00000225140 | RP11-809C18.3 | 0.976339392 | 0.019242964 | ENSG00000106605 | BLVRA      | 0.87759117  | 0.000517659 |
| ENSG00000254488 | RP11-65G9.1   | 0.976362493 | 0.047080728 | ENSG00000166847 | DCTN5      | 0.877650629 | 1.92E-09    |
| ENSG00000261316 | CTC-400I9.1   | 0.97645887  | 0.017766166 | ENSG00000100325 | ASCC2      | 0.877731188 | 0.002781338 |
| ENSG00000231204 | AC011752.1    | 0.976511167 | 0.046513046 | ENSG00000198121 | LPAR1      | 0.877741668 | 2.68E-06    |
| ENSG00000236463 | LINC00427     | 0.976662793 | 0.044209572 | ENSG00000172331 | BPGM       | 0.877842363 | 0.015106388 |
| ENSG00000240770 | C21orf91-OT1  | 0.976983492 | 0.015399163 | ENSG00000113430 | IRX4       | 0.877944942 | 0.002493956 |
| ENSG00000236333 | TRHDE-AS1     | 0.977102264 | 0.02054967  | ENSG00000177106 | EPS8L2     | 0.877959719 | 0.042199209 |
| ENSG00000254082 | CTD-2024D23.1 | 0.977402232 | 0.045608535 | ENSG00000134716 | CYP2J2     | 0.877981675 | 0.000735098 |
| ENSG00000248908 | RP11-730N24.1 | 0.977755992 | 0.018069823 | ENSG00000156110 | ADK        | 0.878006893 | 0.000427119 |
| ENSG00000224356 | RP11-151A6.4  | 0.977779901 | 0.049732891 | ENSG00000182040 | USH1G      | 0.87804045  | 1.56E-12    |
| ENSG00000237413 | RP11-183M13.1 | 0.977880289 | 0.02233731  | ENSG00000136826 | KLF4       | 0.878086162 | 0.026238326 |
| ENSG00000261055 | RP11-195M16.3 | 0.977985766 | 0.031163012 | ENSG00000117054 | ACADM      | 0.878125094 | 0.035823939 |
| ENSG00000235703 | LINC00894     | 0.978213783 | 0.004957553 | ENSG00000182195 | LDOC1      | 0.878336771 | 0.001517488 |
| ENSG00000261697 | RP11-178L8.5  | 0.978457152 | 0.029918789 | ENSG00000176092 | AIM1L      | 0.87835587  | 0.006892321 |
| ENSG00000162947 | AC007364.1    | 0.979499969 | 0.037442158 | ENSG00000049246 | PER3       | 0.878380888 | 1.79E-10    |
| ENSG00000224832 | AP000469.2    | 0.979853793 | 0.02832065  | ENSG00000197622 | CDC42SE1   | 0.878490166 | 0.011312686 |
| ENSG00000229081 | LINC01165     | 0.980369346 | 0.037597397 | ENSG00000148600 | CDHR1      | 0.878518895 | 0.002821259 |
| ENSG00000224376 | AC017104.6    | 0.980444018 | 0.042444744 | ENSG00000129993 | CBFA2T3    | 0.878621942 | 3.79E-05    |
| ENSG00000249307 | LINC01088     | 0.980640578 | 0.023929376 | ENSG00000083720 | OXCT1      | 0.878628015 | 0.009890697 |
| ENSG00000238033 | AC002480.2    | 0.980727702 | 0.039231727 | ENSG00000114480 | GBE1       | 0.878634224 | 3.83E-09    |
| ENSG00000225937 | PCA3          | 0.981345701 | 0.039649527 | ENSG00000197409 | HIST1H3D   | 0.878681396 | 0.03732147  |
| ENSG00000260832 | CTD-3253I12.1 | 0.982275183 | 0.033147289 | ENSG00000100596 | SPTLC2     | 0.878881187 | 1.97E-08    |
| ENSG00000268658 | LINC00664     | 0.983301451 | 0.033528119 | ENSG00000198513 | ATL1       | 0.878902001 | 2.35E-06    |

|                 |               |             |             |                 |            |             |             |
|-----------------|---------------|-------------|-------------|-----------------|------------|-------------|-------------|
| ENSG00000224924 | LINC00320     | 0.983531537 | 0.046018154 | ENSG00000101152 | DNAJC5     | 0.879098654 | 1.47E-11    |
| ENSG00000233973 | RP4-598G3.1   | 0.985422719 | 0.049108086 | ENSG00000162923 | WDR26      | 0.87915317  | 0.001623784 |
| ENSG00000258169 | LINC00485     | 1.020059646 | 0.048437884 | ENSG00000151929 | BAG3       | 0.8792411   | 0.001218126 |
| ENSG00000224743 | TEX26-AS1     | 1.020209512 | 0.044434413 | ENSG00000153006 | SREK1IP1   | 0.879304639 | 1.43E-08    |
| ENSG00000260787 | RP11-797A18.4 | 1.020734377 | 0.041509664 | ENSG00000163545 | NUAK2      | 0.879429582 | 0.048813344 |
| ENSG00000260094 | LINC00564     | 1.021930007 | 0.048171028 | ENSG00000125875 | TBC1D20    | 0.879773764 | 9.93E-14    |
| ENSG00000239415 | AP001469.9    | 1.02214533  | 0.012776632 | ENSG00000158125 | XDH        | 0.879813386 | 0.0013824   |
| ENSG00000272855 | RP5-1102E8.3  | 1.022775513 | 0.025993153 | ENSG00000132002 | DNAJB1     | 0.879814647 | 0.006226455 |
| ENSG00000254102 | RP11-21C4.1   | 1.022844373 | 0.020136227 | ENSG00000167720 | SRR        | 0.879835286 | 1.92E-11    |
| ENSG00000223546 | LINC00630     | 1.023604244 | 0.009359354 | ENSG00000197563 | PIGN       | 0.879837996 | 0.018892987 |
| ENSG00000224308 | RP1-13P20.6   | 1.024663168 | 0.039549902 | ENSG00000119396 | RAB14      | 0.879864994 | 1.18E-07    |
| ENSG00000232825 | RP5-896L10.1  | 1.02500183  | 0.02845292  | ENSG00000121897 | LIAS       | 0.879869857 | 0.002789645 |
| ENSG00000227844 | RP13-143G15.3 | 1.026093932 | 0.020804072 | ENSG00000156011 | PSD3       | 0.879943712 | 3.07E-05    |
| ENSG00000271234 | RP5-894D12.4  | 1.026117285 | 0.032902898 | ENSG00000065613 | SLK        | 0.879989521 | 1.64E-12    |
| ENSG00000228397 | RP1-224A6.3   | 1.02701367  | 0.013377829 | ENSG00000183111 | ARHGEF37   | 0.880011902 | 1.46E-08    |
| ENSG00000215117 | LINC00588     | 1.027172868 | 0.045376009 | ENSG00000183421 | RIPK4      | 0.880093586 | 0.04241277  |
| ENSG00000235824 | LINC00837     | 1.027549975 | 0.011619986 | ENSG00000144048 | DUSP11     | 0.880100342 | 5.60E-18    |
| ENSG00000261728 | RP11-307O13.1 | 1.027993696 | 0.013605776 | ENSG00000159228 | CBR1       | 0.880235442 | 0.000390608 |
| ENSG00000230174 | LINC01149     | 1.028041768 | 0.042548619 | ENSG00000179979 | CRIPAK     | 0.880275651 | 1.65E-07    |
| ENSG00000273487 | RP4-621B10.8  | 1.028290038 | 0.019730103 | ENSG00000124107 | SLPI       | 0.880380049 | 0.000840987 |
| ENSG00000250802 | ZBED3-AS1     | 1.028364678 | 0.002868137 | ENSG00000158092 | NCK1       | 0.880394819 | 0.033255542 |
| ENSG00000225756 | DBH-AS1       | 1.028557737 | 0.017633061 | ENSG00000175449 | RFESD      | 0.880424918 | 1.06E-09    |
| ENSG00000205837 | LINC00487     | 1.02871556  | 0.019610422 | ENSG00000066322 | ELOVL1     | 0.880434261 | 2.96E-11    |
| ENSG00000235437 | RP11-357C3.3  | 1.028724851 | 0.003709206 | ENSG00000114770 | ABCC5      | 0.880469206 | 2.41E-05    |
| ENSG00000234173 | RP11-257I14.1 | 1.028757931 | 0.021897004 | ENSG00000114019 | AMOTL2     | 0.880488637 | 0.004294687 |
| ENSG00000237021 | RP3-486I3.7   | 1.028824329 | 0.017076249 | ENSG00000141985 | SH3GL1     | 0.880526711 | 0.001577037 |
| ENSG00000266456 | RP11-806L2.2  | 1.028852776 | 0.041330467 | ENSG00000149021 | SCGB1A1    | 0.880585246 | 0.023037123 |
| ENSG00000231889 | TRAF3IP2-AS1  | 1.028957328 | 0.006414877 | ENSG00000180383 | DEFB124    | 0.880639202 | 4.21E-09    |
| ENSG00000237949 | LINC00844     | 1.028997491 | 0.041459254 | ENSG00000223547 | ZNF844     | 0.880643414 | 1.74E-07    |
| ENSG00000235142 | RP1-60O19.1   | 1.029223788 | 0.028053746 | ENSG00000135148 | TRAFD1     | 0.880718099 | 3.10E-11    |
| ENSG00000260996 | RP13-122B23.8 | 1.029303482 | 0.007218489 | ENSG00000235978 | AC018816.3 | 0.880763579 | 5.27E-09    |
| ENSG00000225391 | RP11-55K22.5  | 1.029436716 | 0.010009694 | ENSG00000125733 | TRIP10     | 0.880870458 | 0.002663862 |
| ENSG00000227195 | MIR663A       | 1.02964733  | 0.013449114 | ENSG00000132471 | WBP2       | 0.880930739 | 1.77E-05    |
| ENSG00000267003 | CTC-507E2.1   | 1.029813127 | 0.016945371 | ENSG00000115963 | RND3       | 0.880933147 | 0.006457111 |
| ENSG00000261326 | RP5-1057J7.6  | 1.030122562 | 0.039254583 | ENSG00000104419 | NDRG1      | 0.880993341 | 2.64E-07    |
| ENSG00000253279 | FAM183CP      | 1.030616509 | 0.014005039 | ENSG00000166946 | CCNDBP1    | 0.880999404 | 3.42E-07    |
| ENSG00000233542 | RP11-547D24.1 | 1.030911158 | 0.029927478 | ENSG00000076513 | ANKRD13A   | 0.881012307 | 4.13E-08    |
| ENSG00000234715 | CTB-107G13.1  | 1.031043113 | 0.015727739 | ENSG00000013441 | CLK1       | 0.881117884 | 1.31E-05    |
| ENSG00000250280 | RP11-305O6.3  | 1.031131421 | 0.026811562 | ENSG00000160213 | CSTB       | 0.881160145 | 0.013841388 |
| ENSG00000267296 | CEBPA-AS1     | 1.031276896 | 0.027583621 | ENSG00000130363 | RSPH3      | 0.881181991 | 6.44E-08    |
| ENSG00000237187 | NR2F1-AS1     | 1.031325572 | 0.019717357 | ENSG00000124370 | MCEE       | 0.881221699 | 2.55E-06    |
| ENSG00000253614 | RP11-513O17.3 | 1.031347888 | 0.012708199 | ENSG00000081181 | ARG2       | 0.881251889 | 0.000929203 |
| ENSG00000272374 | RP3-329A5.8   | 1.031474752 | 0.02431086  | ENSG00000151690 | MFSD6      | 0.881294591 | 0.035320259 |
| ENSG00000261242 | CTD-2302E22.4 | 1.031560111 | 0.021191253 | ENSG00000006555 | TTC22      | 0.88138993  | 0.012755103 |
| ENSG00000267427 | CTC-503J8.6   | 1.031801952 | 0.019335946 | ENSG00000165548 | TMEM63C    | 0.88139242  | 9.60E-06    |
| ENSG00000224281 | SLC25A5-AS1   | 1.032305856 | 0.039918506 | ENSG00000158195 | WASF2      | 0.881551775 | 0.000794513 |
| ENSG00000261839 | RP1-265C24.8  | 1.032695991 | 0.027520526 | ENSG00000102970 | CCL17      | 0.881773972 | 1.43E-08    |

|                 |               |             |             |                 |          |             |             |
|-----------------|---------------|-------------|-------------|-----------------|----------|-------------|-------------|
| ENSG00000257337 | RP11-983P16.4 | 1.033208921 | 0.009894444 | ENSG00000137710 | RDX      | 0.881811161 | 1.97E-06    |
| ENSG00000225361 | PPP1R26-AS1   | 1.033230688 | 0.010230694 | ENSG00000215301 | DDX3X    | 0.88190476  | 5.10E-09    |
| ENSG00000247092 | SNHG10        | 1.03330424  | 0.005477972 | ENSG00000180638 | SLC47A2  | 0.881967469 | 6.74E-06    |
| ENSG00000234327 | AC012146.7    | 1.033315909 | 0.045704203 | ENSG00000170379 | FAM115C  | 0.881970558 | 5.56E-13    |
| ENSG00000225794 | AC073321.4    | 1.033407939 | 0.020985833 | ENSG00000143409 | FAM63A   | 0.882052309 | 0.000296404 |
| ENSG00000231074 | HCG18         | 1.034010434 | 0.009131203 | ENSG00000062598 | ELMO2    | 0.882181434 | 0.000301359 |
| ENSG00000270096 | RP11-362K14.6 | 1.034237536 | 0.00892093  | ENSG00000164603 | C7orf60  | 0.882433382 | 1.00E-05    |
| ENSG00000183674 | LINC00518     | 1.034473151 | 0.025335668 | ENSG00000143995 | MEIS1    | 0.882468439 | 0.040011272 |
| ENSG00000254288 | RP11-6I2.3    | 1.034524673 | 0.010814422 | ENSG00000100321 | SYNGR1   | 0.882492163 | 6.21E-05    |
| ENSG00000268388 | FENDRR        | 1.034657721 | 0.022591486 | ENSG00000100284 | TOM1     | 0.88257984  | 0.019000845 |
| ENSG00000235927 | NEXN-AS1      | 1.034826635 | 0.00475537  | ENSG00000126368 | NR1D1    | 0.882672221 | 5.62E-08    |
| ENSG00000227518 | MIR1302-9     | 1.034829474 | 0.024436536 | ENSG00000070159 | PTPN3    | 0.88270421  | 2.39E-07    |
| ENSG00000260339 | HEXA-AS1      | 1.035219844 | 0.036301028 | ENSG00000170545 | SMAGP    | 0.882875832 | 2.38E-07    |
| ENSG00000261094 | RP11-355O1.11 | 1.035438108 | 0.014765218 | ENSG00000095383 | TBC1D2   | 0.882882316 | 0.013192319 |
| ENSG00000226747 | AC007966.1    | 1.035778504 | 0.014852044 | ENSG00000161203 | AP2M1    | 0.882956613 | 2.24E-07    |
| ENSG00000259915 | RP11-410E4.1  | 1.035903316 | 0.020961576 | ENSG00000114374 | USP9Y    | 0.882966886 | 0.013642867 |
| ENSG00000240350 | AC017002.1    | 1.035963013 | 0.023825071 | ENSG00000175866 | BAIAP2   | 0.883150896 | 0.001100914 |
| ENSG00000271590 | RP11-181E10.3 | 1.036017263 | 0.001572604 | ENSG00000204138 | PHACTR4  | 0.883212692 | 0.027413079 |
| ENSG00000261298 | RP11-309M7.1  | 1.036133783 | 0.034720824 | ENSG00000114573 | ATP6V1A  | 0.883236248 | 2.84E-09    |
| ENSG00000234705 | HMGA1P4       | 1.036140748 | 0.005748031 | ENSG00000007168 | PAFAH1B1 | 0.883260197 | 1.46E-10    |
| ENSG00000244567 | AC096772.6    | 1.036214674 | 0.036649094 | ENSG00000183323 | CCDC125  | 0.883398407 | 1.77E-06    |
| ENSG00000258867 | LINC01146     | 1.036220324 | 0.012656733 | ENSG00000047365 | ARAP2    | 0.883404257 | 2.31E-08    |
| ENSG00000188825 | LINC00910     | 1.036363565 | 0.013901467 | ENSG00000164117 | FBXO8    | 0.88348458  | 1.53E-07    |
| ENSG00000273363 | RP11-285G1.14 | 1.036716125 | 0.02069087  | ENSG00000134324 | LPIN1    | 0.883636344 | 0.000396179 |
| ENSG00000251323 | RP11-452H21.4 | 1.036750866 | 0.027376812 | ENSG00000150768 | DLAT     | 0.883836245 | 1.47E-06    |
| ENSG00000272990 | RP11-305K5.1  | 1.036848245 | 0.012522794 | ENSG00000079931 | MOXD1    | 0.884140076 | 0.004312326 |
| ENSG00000259326 | RP11-102L12.2 | 1.036876861 | 0.001419496 | ENSG00000172939 | OXR1     | 0.884269399 | 7.26E-08    |
| ENSG00000237686 | RP5-1120P11.1 | 1.037088507 | 0.021877268 | ENSG00000101928 | MOSPD1   | 0.884298823 | 0.005163668 |
| ENSG00000235954 | TTC28-AS1     | 1.037396136 | 0.000284846 | ENSG00000185272 | RBM11    | 0.884363743 | 0.000261128 |
| ENSG00000232160 | RAP2C-AS1     | 1.037448443 | 0.020840856 | ENSG00000131375 | CAPN7    | 0.88465848  | 2.80E-07    |
| ENSG00000259347 | RP11-798K3.2  | 1.037729283 | 0.033452863 | ENSG00000164743 | C8orf48  | 0.884787557 | 6.84E-05    |
| ENSG00000254980 | RP11-794P6.6  | 1.037881185 | 0.038528419 | ENSG00000163071 | SPATA18  | 0.884952863 | 9.96E-07    |
| ENSG00000163597 | SNHG16        | 1.038012702 | 0.011589711 | ENSG00000153885 | KCTD15   | 0.885012613 | 0.000163999 |
| ENSG00000265625 | RP11-68I3.11  | 1.038324006 | 0.016721311 | ENSG00000173715 | C11orf80 | 0.885098234 | 0.000184709 |
| ENSG00000248309 | MEF2C-AS1     | 1.038515877 | 0.012259296 | ENSG00000170473 | WIBG     | 0.885124016 | 2.87E-11    |
| ENSG00000251024 | RP11-203B7.1  | 1.038645958 | 0.04176203  | ENSG00000110693 | SOX6     | 0.885126021 | 8.57E-07    |
| ENSG00000233569 | RP11-500B12.1 | 1.038787437 | 0.023140343 | ENSG00000164830 | OXR1     | 0.885167592 | 2.03E-06    |
| ENSG00000198106 | SNX29P2       | 1.038796025 | 0.008593496 | ENSG00000122068 | FYT1D1   | 0.88522351  | 2.00E-07    |
| ENSG00000267222 | RP11-194N12.2 | 1.03923715  | 0.038619712 | ENSG00000162959 | MEMO1    | 0.885285726 | 1.91E-09    |
| ENSG00000266918 | RP11-798G7.8  | 1.03931739  | 0.047515282 | ENSG00000168795 | ZBTB5    | 0.88533328  | 0.000445679 |
| ENSG00000253352 | TUG1          | 1.039320274 | 0.017806365 | ENSG00000116044 | NFE2L2   | 0.885335923 | 0.02811981  |
| ENSG00000204685 | STARD7-AS1    | 1.039793286 | 0.003757922 | ENSG00000129255 | MPDU1    | 0.885351646 | 0.000159169 |
| ENSG00000177640 | CASC2         | 1.039881667 | 0.000335055 | ENSG00000254535 | PABPC4L  | 0.88536457  | 5.85E-05    |
| ENSG00000223823 | RP11-465B22.5 | 1.039941371 | 0.045639292 | ENSG00000136830 | FAM129B  | 0.885460099 | 2.73E-15    |
| ENSG00000265206 | MIR142        | 1.040143739 | 0.030816187 | ENSG00000036448 | MYOM2    | 0.885494136 | 2.66E-05    |
| ENSG00000215908 | CROCCP2       | 1.040789456 | 0.00138797  | ENSG00000189060 | H1FO     | 0.885522949 | 0.000226484 |
| ENSG00000172965 | MIR4435-1HG   | 1.040843468 | 0.011024225 | ENSG00000092621 | PHGDH    | 0.88554402  | 0.023795199 |

|                 |                  |             |             |                 |          |             |             |
|-----------------|------------------|-------------|-------------|-----------------|----------|-------------|-------------|
| ENSG00000188185 | LINC00265        | 1.040942113 | 0.030738243 | ENSG00000153391 | INO80C   | 0.885904993 | 5.10E-07    |
| ENSG00000204666 | CTD-2126E3.1     | 1.041110364 | 0.018344474 | ENSG00000100897 | DCAF11   | 0.885966697 | 2.84E-11    |
| ENSG00000251199 | RP11-400D2.2     | 1.041355606 | 0.000912082 | ENSG00000159256 | MORC3    | 0.885967731 | 3.90E-06    |
| ENSG00000232416 | BPESC1           | 1.041372655 | 0.009238874 | ENSG00000110080 | ST3GAL4  | 0.885979223 | 0.002123223 |
| ENSG00000261136 | RP11-37C7.3      | 1.041628454 | 0.016917953 | ENSG00000067836 | ROGDI    | 0.886034359 | 0.001373491 |
| ENSG00000261182 | RP11-201A3.1     | 1.041730278 | 5.08E-05    | ENSG00000177098 | SCN4B    | 0.88607146  | 1.09E-05    |
| ENSG00000246130 | RP11-875O11.2    | 1.04195015  | 0.000773799 | ENSG00000160593 | AMICA1   | 0.886104409 | 7.32E-05    |
| ENSG00000254528 | RP11-728F11.4    | 1.04201462  | 0.033330546 | ENSG00000232629 | HLA-DQB2 | 0.886200935 | 0.013511469 |
| ENSG00000229656 | RP11-462L8.1     | 1.042951813 | 0.005178517 | ENSG00000175322 | ZNF519   | 0.886202942 | 0.000126062 |
| ENSG00000227290 | RP4-544H6.2      | 1.043224742 | 0.00489948  | ENSG00000165841 | CYP2C19  | 0.886258857 | 0.000425588 |
| ENSG00000247828 | TMEM161B-AS1     | 1.043342526 | 0.022054116 | ENSG00000197312 | DDI2     | 0.886267951 | 3.78E-10    |
| ENSG00000272914 | RP11-330O11.3    | 1.043372305 | 0.027957265 | ENSG00000127666 | TICAM1   | 0.886417738 | 0.013153506 |
| ENSG00000259343 | RP11-761I4.3     | 1.043399033 | 0.020254675 | ENSG00000108061 | SHOC2    | 0.886470147 | 1.02E-09    |
| ENSG00000261780 | CTD-2354A18.1    | 1.043961858 | 0.011522988 | ENSG00000162981 | FAM84A   | 0.886515407 | 0.000252756 |
| ENSG00000255399 | TBX5-AS1         | 1.044169974 | 0.001776769 | ENSG00000172738 | TMEM217  | 0.886702726 | 6.14E-07    |
| ENSG00000261005 | CTB-58E17.1      | 1.044277022 | 0.046845197 | ENSG00000184012 | TMPRSS2  | 0.886776412 | 3.65E-05    |
| ENSG00000203897 | SPATA42          | 1.044285859 | 0.002820537 | ENSG00000176531 | PHLDB3   | 0.886782434 | 1.20E-06    |
| ENSG00000262652 | RP13-638C3.2     | 1.04432281  | 0.004787423 | ENSG00000043039 | BARX2    | 0.886942254 | 0.000700573 |
| ENSG00000231728 | LLOXNC01-116E7.2 | 1.044455938 | 0.043198405 | ENSG00000131737 | KRT34    | 0.886961792 | 1.47E-08    |
| ENSG00000261357 | RP11-626G11.1    | 1.044565426 | 0.011368621 | ENSG00000075336 | TIMM21   | 0.887006993 | 5.03E-08    |
| ENSG00000238005 | RP11-443B7.1     | 1.044698367 | 0.006567068 | ENSG00000161513 | FDXR     | 0.887021666 | 8.45E-06    |
| ENSG00000267374 | LINC00669        | 1.044927492 | 0.007047972 | ENSG00000163683 | SMIM14   | 0.88703088  | 1.12E-06    |
| ENSG00000177410 | ZFAS1            | 1.045501042 | 0.019618171 | ENSG00000110944 | IL23A    | 0.887308382 | 0.001181542 |
| ENSG00000231999 | RP5-1007M22.2    | 1.045567211 | 0.023830346 | ENSG00000213903 | LTB4R    | 0.887315137 | 0.011028727 |
| ENSG00000272767 | JMJD1C-AS1       | 1.045737916 | 0.020113211 | ENSG00000104413 | ESRP1    | 0.887340941 | 8.42E-10    |
| ENSG00000260583 | LINC00515        | 1.045920777 | 0.031058379 | ENSG00000137393 | RNF144B  | 0.887386593 | 3.84E-06    |
| ENSG00000255389 | C6orf3           | 1.046045948 | 0.005961861 | ENSG00000153140 | CETN3    | 0.887548209 | 5.17E-08    |
| ENSG00000260938 | RP4-593C16.3     | 1.046142859 | 0.048493108 | ENSG00000170522 | ELOVL6   | 0.887559866 | 8.64E-05    |
| ENSG00000232388 | LINC00493        | 1.046150359 | 0.001520402 | ENSG00000143149 | ALDH9A1  | 0.887582927 | 0.00151686  |
| ENSG00000260790 | RP11-21M24.2     | 1.046405172 | 0.004108034 | ENSG00000175348 | TMEM9B   | 0.887638947 | 7.58E-10    |
| ENSG00000228204 | RP4-724E13.2     | 1.046546228 | 0.040216853 | ENSG00000204618 | RNF39    | 0.887762627 | 0.009230709 |
| ENSG00000234028 | AC062029.1       | 1.046745336 | 6.30E-05    | ENSG00000177614 | PGBD5    | 0.887786957 | 7.95E-05    |
| ENSG00000261502 | RP11-96H17.1     | 1.047437729 | 0.004134822 | ENSG00000099204 | ABLIM1   | 0.887811143 | 0.003567221 |
| ENSG00000246582 | RP11-1149O23.3   | 1.0486146   | 0.038594273 | ENSG00000117602 | RCAN3    | 0.887893592 | 8.89E-16    |
| ENSG00000224138 | AC000123.4       | 1.04871043  | 0.040874774 | ENSG00000167693 | NXN      | 0.887921876 | 0.035240956 |
| ENSG00000267892 | CTD-2540F13.2    | 1.048909969 | 0.004165671 | ENSG00000203780 | FANK1    | 0.887943394 | 0.000418016 |
| ENSG00000231920 | NEBL-AS1         | 1.048940943 | 0.033398623 | ENSG00000177034 | MTX3     | 0.888242429 | 0.000472695 |
| ENSG00000230896 | RP11-767N6.7     | 1.049039937 | 0.028629601 | ENSG00000113575 | PPP2CA   | 0.888276071 | 1.54E-10    |
| ENSG00000269609 | RP11-181I4.10    | 1.049078077 | 0.005256871 | ENSG00000120915 | EPHX2    | 0.888292985 | 0.008906579 |
| ENSG00000272654 | RP11-422P24.11   | 1.049394455 | 0.010902108 | ENSG00000185022 | MAFF     | 0.888360713 | 3.58E-09    |
| ENSG00000270937 | RP5-856G1.1      | 1.049440036 | 0.043842176 | ENSG00000142494 | SLC47A1  | 0.88842207  | 0.007945222 |
| ENSG00000257084 | U47924.27        | 1.049440744 | 0.01025179  | ENSG00000151726 | ACSL1    | 0.888439166 | 0.048044061 |
| ENSG00000267838 | AC008746.12      | 1.049506623 | 0.032292189 | ENSG00000151247 | EIF4E    | 0.888452719 | 1.41E-14    |
| ENSG00000204584 | RP11-304F15.3    | 1.04951856  | 0.030023442 | ENSG00000171517 | LPAR3    | 0.888480495 | 0.001517325 |
| ENSG00000244184 | RP11-314A20.2    | 1.049712049 | 0.001386465 | ENSG00000172137 | CALB2    | 0.888564244 | 0.009548776 |
| ENSG00000261829 | RP11-223I10.1    | 1.049742584 | 0.012172572 | ENSG00000156515 | HK1      | 0.888585876 | 0.000991144 |
| ENSG00000244558 | RP11-445H22.4    | 1.049846154 | 0.020669944 | ENSG00000102312 | PORCN    | 0.888608321 | 0.019315885 |

|                 |                |             |             |                 |            |             |             |
|-----------------|----------------|-------------|-------------|-----------------|------------|-------------|-------------|
| ENSG00000228265 | RP5-1125A11.1  | 1.050133047 | 0.029317807 | ENSG00000080371 | RAB21      | 0.888651414 | 1.76E-10    |
| ENSG00000230124 | RP5-1180C10.2  | 1.050194678 | 0.021979808 | ENSG00000152242 | C18orf25   | 0.888828754 | 0.004286958 |
| ENSG00000246263 | KB-431C1.4     | 1.050774726 | 0.022983702 | ENSG00000107130 | NCS1       | 0.888835213 | 0.00109986  |
| ENSG00000247595 | SPTY2D1-AS1    | 1.050929224 | 0.006346412 | ENSG00000051620 | HEBP2      | 0.888882942 | 0.000274538 |
| ENSG00000272405 | RP11-284F21.10 | 1.050936657 | 0.0067212   | ENSG00000104371 | DKK4       | 0.88890382  | 0.003543406 |
| ENSG00000273384 | RP5-1098D14.1  | 1.051042973 | 0.001350689 | ENSG00000082438 | COBLL1     | 0.888968944 | 0.008995763 |
| ENSG00000269202 | RP4-614O4.12   | 1.051433996 | 0.009129717 | ENSG00000123091 | RNF11      | 0.888979559 | 0.019069985 |
| ENSG00000259732 | RP11-59H7.3    | 1.051515713 | 0.002795641 | ENSG00000163218 | PGLYRP4    | 0.888992178 | 0.026291428 |
| ENSG00000236859 | NIFK-AS1       | 1.051585734 | 0.035623294 | ENSG00000137747 | TMPRSS13   | 0.889007388 | 3.96E-08    |
| ENSG00000260329 | RP11-412D9.4   | 1.05161496  | 0.011326947 | ENSG00000169855 | ROBO1      | 0.889020587 | 0.001692646 |
| ENSG00000257742 | RP11-350F4.2   | 1.052062927 | 0.048740081 | ENSG00000172175 | MALT1      | 0.889113549 | 0.00836665  |
| ENSG00000260855 | RP11-439E19.10 | 1.05220781  | 0.000588845 | ENSG00000064042 | LIMCH1     | 0.889236477 | 0.004371998 |
| ENSG00000237248 | LINC00987      | 1.0525463   | 0.012180618 | ENSG00000218416 | AC110619.2 | 0.889275608 | 0.008538903 |
| ENSG00000261220 | RP11-629O1.2   | 1.052873528 | 0.0033536   | ENSG00000026103 | FAS        | 0.889285627 | 0.002102682 |
| ENSG00000261088 | RP11-61A14.3   | 1.052902052 | 0.004396974 | ENSG00000137274 | BPHL       | 0.889305919 | 0.00074106  |
| ENSG00000224081 | LINC01057      | 1.052939976 | 0.011037094 | ENSG00000151694 | ADAM17     | 0.889497873 | 1.10E-10    |
| ENSG00000118412 | CASP8AP2       | 1.053007823 | 0.01116183  | ENSG00000185585 | OLFML2A    | 0.88950365  | 9.03E-05    |
| ENSG00000265678 | RP11-1376P16.2 | 1.053045171 | 0.003318485 | ENSG00000083799 | CYLD       | 0.8895127   | 6.09E-08    |
| ENSG00000259248 | USP3-AS1       | 1.053575151 | 0.001973017 | ENSG00000100319 | ZMAT5      | 0.889573089 | 0.014738013 |
| ENSG00000257718 | RP11-396F22.1  | 1.053620579 | 0.001110103 | ENSG00000139364 | TMEM132B   | 0.889586069 | 2.29E-07    |
| ENSG00000224930 | LINC00162      | 1.053794125 | 0.046874593 | ENSG00000148120 | C9orf3     | 0.889613744 | 0.00159931  |
| ENSG00000270143 | AC004257.3     | 1.054163345 | 0.029233937 | ENSG00000153130 | SCOC       | 0.889739149 | 0.000413054 |
| ENSG00000253187 | HOXA10-AS      | 1.054198714 | 0.013342318 | ENSG00000099246 | RAB18      | 0.889864573 | 5.14E-13    |
| ENSG00000253508 | RP1-170O19.14  | 1.054488128 | 0.025500716 | ENSG00000181788 | SIAH2      | 0.889905804 | 0.001542311 |
| ENSG00000215447 | BX322557.10    | 1.054598768 | 0.00335988  | ENSG00000089723 | OTUB2      | 0.889906266 | 0.00981418  |
| ENSG00000243479 | MNX1-AS1       | 1.054822019 | 0.014936124 | ENSG00000138463 | DIRC2      | 0.890003948 | 3.13E-07    |
| ENSG00000273018 | CTD-2303H24.2  | 1.055116544 | 0.01061245  | ENSG00000145779 | TNFAIP8    | 0.89003955  | 6.25E-06    |
| ENSG00000269293 | ZSCAN16-AS1    | 1.0554232   | 1.64E-06    | ENSG00000126705 | AHDC1      | 0.890062923 | 8.80E-05    |
| ENSG00000261051 | RP11-274H2.5   | 1.05559084  | 0.034939184 | ENSG00000106526 | ACTR3C     | 0.890090448 | 7.89E-05    |
| ENSG00000273162 | RP11-108L7.15  | 1.055713447 | 0.035174347 | ENSG00000173801 | JUP        | 0.890117974 | 0.000533202 |
| ENSG00000266289 | RP11-1C8.6     | 1.055873421 | 0.007919801 | ENSG00000136783 | NIPSNAP3A  | 0.890137298 | 2.00E-06    |
| ENSG00000233137 | RP11-220I1.1   | 1.055966614 | 0.000900006 | ENSG00000042493 | CAPG       | 0.890228312 | 1.01E-05    |
| ENSG00000229728 | RP11-314N13.3  | 1.056403074 | 0.024419953 | ENSG00000112902 | SEMA5A     | 0.890296786 | 0.004289824 |
| ENSG00000215424 | MCM3AP-AS1     | 1.056832725 | 0.017460975 | ENSG00000159871 | LYPD5      | 0.89044802  | 3.19E-06    |
| ENSG00000261731 | CTD-2358C21.4  | 1.056858322 | 0.02976443  | ENSG00000145246 | ATP10D     | 0.890481215 | 0.010420245 |
| ENSG00000257167 | TMPO-AS1       | 1.056943031 | 0.015942566 | ENSG00000182054 | IDH2       | 0.890493076 | 4.17E-05    |
| ENSG00000258897 | EGLN3-AS1      | 1.057003109 | 0.025344167 | ENSG00000104055 | TGM5       | 0.890550487 | 0.003379386 |
| ENSG00000260686 | CTB-36H16.2    | 1.057156232 | 0.001204242 | ENSG00000100387 | RBX1       | 0.890586075 | 0.000673326 |
| ENSG00000233392 | AC104809.4     | 1.057267357 | 0.03082751  | ENSG00000168010 | ATG16L2    | 0.890743182 | 3.43E-06    |
| ENSG00000142396 | ERVK3-1        | 1.057543274 | 0.010977339 | ENSG00000185614 | FAM212A    | 0.890771952 | 1.87E-09    |
| ENSG00000235072 | AC012074.2     | 1.057649618 | 0.029217425 | ENSG00000166589 | CDH16      | 0.890805563 | 0.025219245 |
| ENSG00000206573 | SETD5-AS1      | 1.057778784 | 0.016849383 | ENSG00000196700 | ZNF512B    | 0.890843419 | 0.003692058 |
| ENSG00000231721 | LINC-PINT      | 1.057879991 | 9.72E-07    | ENSG00000147576 | ADHFE1     | 0.890993019 | 1.74E-08    |
| ENSG00000272201 | U47924.30      | 1.058382651 | 0.002216615 | ENSG00000159516 | SPRR2G     | 0.891125862 | 1.33E-06    |
| ENSG00000234741 | GAS5           | 1.058543961 | 0.007586773 | ENSG00000187531 | SIRT7      | 0.891130975 | 5.55E-11    |
| ENSG00000260257 | RP5-1085F17.3  | 1.058576123 | 0.000201536 | ENSG00000123505 | AMD1       | 0.891356835 | 3.38E-08    |
| ENSG00000261589 | CTC-462L7.1    | 1.058591789 | 8.45E-05    | ENSG00000165527 | ARF6       | 0.89143655  | 0.005578151 |

|                 |                 |             |             |                 |            |             |             |
|-----------------|-----------------|-------------|-------------|-----------------|------------|-------------|-------------|
| ENSG00000269189 | RP11-573N10.1   | 1.058601271 | 0.002777955 | ENSG00000135374 | ELF5       | 0.891533252 | 1.57E-05    |
| ENSG00000255418 | RP11-266A24.1   | 1.058624373 | 0.00295239  | ENSG00000211956 | IGHV4-34   | 0.891638133 | 0.00654252  |
| ENSG00000270147 | RP11-646I6.6    | 1.058860239 | 0.004348119 | ENSG00000143061 | IGSF3      | 0.891646069 | 0.000262528 |
| ENSG00000234899 | SOX9-AS1        | 1.058868899 | 0.009589848 | ENSG00000102891 | MT4        | 0.891649675 | 0.001163492 |
| ENSG00000259439 | RP11-89K21.1    | 1.05893183  | 0.001663979 | ENSG00000097033 | SH3GLB1    | 0.891761976 | 2.12E-06    |
| ENSG00000268006 | PTOV1-AS1       | 1.058936415 | 0.029684937 | ENSG00000165169 | DYNLT3     | 0.891798368 | 2.11E-06    |
| ENSG00000230461 | PROX1-AS1       | 1.059120505 | 0.002096684 | ENSG00000081760 | AACS       | 0.891813628 | 0.0175817   |
| ENSG00000269416 | CTB-175P5.4     | 1.059184551 | 0.041383162 | ENSG00000168216 | LMBRD1     | 0.891836602 | 3.91E-07    |
| ENSG00000261324 | RP11-174G6.5    | 1.059282574 | 0.045749503 | ENSG00000123353 | ORMDL2     | 0.89191072  | 6.29E-10    |
| ENSG00000231057 | RP11-122M14.1   | 1.059313052 | 0.003284899 | ENSG00000120784 | ZFP30      | 0.891927763 | 2.16E-05    |
| ENSG00000259577 | RP11-430B1.2    | 1.059384157 | 0.007069105 | ENSG00000014216 | CAPN1      | 0.892053739 | 0.020564656 |
| ENSG00000258730 | ITPK1-AS1       | 1.059465707 | 0.001018495 | ENSG00000166025 | AMOTL1     | 0.892240796 | 2.39E-08    |
| ENSG00000260742 | RP11-366L5.1    | 1.059724627 | 0.000503255 | ENSG00000168461 | RAB31      | 0.892269391 | 0.000306416 |
| ENSG00000245571 | AP001258.4      | 1.059751686 | 0.006801191 | ENSG00000072415 | MPP5       | 0.892352853 | 2.78E-06    |
| ENSG00000260948 | RP11-552M11.8   | 1.06025548  | 0.003834307 | ENSG00000178078 | STAP2      | 0.89235735  | 0.000233378 |
| ENSG00000245060 | LINC00847       | 1.060283428 | 0.041530954 | ENSG00000141098 | GFOD2      | 0.892435069 | 0.001039683 |
| ENSG00000177853 | ZNF518A         | 1.060335861 | 0.023015542 | ENSG00000136235 | GPNUMB     | 0.892491493 | 0.007094444 |
| ENSG00000226200 | RP11-50E11.3    | 1.060444068 | 0.021638702 | ENSG00000171462 | DLK2       | 0.892721482 | 0.004587589 |
| ENSG00000261098 | RP11-819C21.1   | 1.060648452 | 0.02619513  | ENSG00000166689 | PLEKHA7    | 0.892746116 | 4.59E-05    |
| ENSG00000270066 | SCARNA2         | 1.060713354 | 0.033800941 | ENSG00000160886 | LY6K       | 0.892763805 | 0.01363486  |
| ENSG00000214922 | HLA-F-AS1       | 1.060721635 | 0.002878882 | ENSG00000188910 | GJB3       | 0.892842441 | 0.000917208 |
| ENSG00000273237 | CTB-119C2.1     | 1.060748155 | 8.73E-05    | ENSG00000169032 | MAP2K1     | 0.892900806 | 0.002265984 |
| ENSG00000239911 | PRKAG2-AS1      | 1.060780969 | 0.006471184 | ENSG00000019549 | SNAI2      | 0.892934917 | 0.043738586 |
| ENSG00000223478 | RP11-545E17.3   | 1.061720558 | 0.021799032 | ENSG00000269879 | AL353583.1 | 0.893022679 | 7.52E-07    |
| ENSG00000260971 | RP11-504A18.1   | 1.061980222 | 0.001199237 | ENSG00000140396 | NCOA2      | 0.893122826 | 8.20E-06    |
| ENSG00000254389 | RHPN1-AS1       | 1.06239947  | 0.000142111 | ENSG00000166192 | SENP8      | 0.893265053 | 1.01E-07    |
| ENSG00000250337 | LINC01021       | 1.062488376 | 0.000120217 | ENSG00000125775 | SDCBP2     | 0.893342922 | 5.98E-06    |
| ENSG00000229637 | PRAC2           | 1.062683652 | 0.001674477 | ENSG00000162599 | NFIA       | 0.893407279 | 3.87E-08    |
| ENSG00000224418 | STK24-AS1       | 1.063055293 | 0.020060597 | ENSG00000169129 | AFAP1L2    | 0.893448822 | 0.006063431 |
| ENSG00000259863 | SH3RF3-AS1      | 1.063110204 | 0.001330338 | ENSG00000159348 | CYB5R1     | 0.89347316  | 0.005644911 |
| ENSG00000230679 | ENO1-AS1        | 1.063219585 | 0.021443098 | ENSG00000163995 | ABLIM2     | 0.893485005 | 8.66E-07    |
| ENSG00000231365 | RP11-418J17.1   | 1.063382908 | 0.000663838 | ENSG00000198668 | CALM1      | 0.893503598 | 1.49E-13    |
| ENSG00000261505 | LA16c-358B7.3   | 1.064411898 | 0.005099557 | ENSG00000158485 | CD1B       | 0.893621035 | 4.43E-05    |
| ENSG00000272994 | RP11-332H14.2   | 1.064496624 | 0.019315577 | ENSG00000246705 | H2AFJ      | 0.893656704 | 2.52E-08    |
| ENSG00000239482 | RP11-90K6.1     | 1.064586342 | 0.001219858 | ENSG00000221914 | PPP2R2A    | 0.893734817 | 6.34E-06    |
| ENSG00000232533 | AC093673.5      | 1.064624794 | 7.84E-05    | ENSG00000167114 | SLC27A4    | 0.893872924 | 1.12E-08    |
| ENSG00000256232 | RP11-771K4.1    | 1.065137535 | 0.002292623 | ENSG00000162873 | KLHDC8A    | 0.894061224 | 0.010041445 |
| ENSG00000260879 | RP11-483I13.5   | 1.065250545 | 0.004128359 | ENSG00000149196 | C11orf73   | 0.894226542 | 0.004612458 |
| ENSG00000225335 | XXbac-B476C20.9 | 1.065263102 | 0.022486516 | ENSG00000092931 | MFSD11     | 0.894240485 | 1.06E-05    |
| ENSG00000227719 | AC006042.6      | 1.065350611 | 0.047469787 | ENSG00000119139 | TJP2       | 0.894326923 | 4.00E-07    |
| ENSG00000273355 | RP11-672L10.6   | 1.065601407 | 0.034862251 | ENSG00000164855 | TMEM184A   | 0.894392263 | 9.16E-08    |
| ENSG00000226137 | BAIAP2-AS1      | 1.066111825 | 4.00E-05    | ENSG00000109466 | KLHL2      | 0.894525987 | 4.18E-05    |
| ENSG00000235652 | RP11-545I5.3    | 1.066112966 | 0.026576616 | ENSG00000181007 | ZFP82      | 0.894542082 | 0.012126943 |
| ENSG00000271755 | RP1-153G14.4    | 1.066444015 | 0.047705184 | ENSG00000140945 | CDH13      | 0.894584108 | 0.014368815 |
| ENSG00000227036 | LINC00511       | 1.066662468 | 1.64E-05    | ENSG00000154727 | GABPA      | 0.894699572 | 2.99E-06    |
| ENSG00000268001 | CTC-241F20.3    | 1.066772701 | 0.049233009 | ENSG00000132842 | AP3B1      | 0.894722987 | 3.69E-10    |
| ENSG00000223891 | OSER1-AS1       | 1.066772842 | 0.033572783 | ENSG00000196743 | GM2A       | 0.894724168 | 0.004327236 |

|                 |                |             |             |                 |         |             |             |
|-----------------|----------------|-------------|-------------|-----------------|---------|-------------|-------------|
| ENSG00000263826 | RP11-573D15.9  | 1.066879725 | 0.000662896 | ENSG00000065833 | ME1     | 0.894917397 | 0.020270949 |
| ENSG00000273455 | RP11-305O4.3   | 1.066918003 | 0.001070663 | ENSG00000153113 | CAST    | 0.895014935 | 0.004156178 |
| ENSG00000253738 | GS1-251I9.4    | 1.067389148 | 0.002091109 | ENSG00000137100 | DCTN3   | 0.895152869 | 0.000199173 |
| ENSG00000248175 | CTC-428G20.3   | 1.067742756 | 0.006825611 | ENSG00000227124 | ZNF717  | 0.895300753 | 7.97E-06    |
| ENSG00000270091 | RP11-78O7.2    | 1.067929628 | 0.002591837 | ENSG00000001617 | SEMA3F  | 0.895338931 | 0.012300115 |
| ENSG00000223380 | SEC22B         | 1.068115223 | 6.93E-05    | ENSG00000152217 | SETBP1  | 0.895344185 | 0.011581616 |
| ENSG00000272953 | RP11-1275H24.2 | 1.068432241 | 0.030373255 | ENSG00000176769 | TCERG1L | 0.895466647 | 0.000125376 |
| ENSG00000271824 | AC009014.3     | 1.068563514 | 0.030469632 | ENSG00000158290 | CUL4B   | 0.895641783 | 0.028016506 |
| ENSG00000256546 | AC156455.1     | 1.068788735 | 7.55E-05    | ENSG00000164871 | SPAG11B | 0.895710127 | 5.47E-07    |
| ENSG00000272644 | RP11-33O4.1    | 1.068958766 | 0.00637267  | ENSG00000130939 | UBE4B   | 0.895742514 | 0.001215625 |
| ENSG00000267957 | RP11-178G16.4  | 1.069020394 | 0.011447926 | ENSG00000005001 | PRSS22  | 0.895779007 | 3.75E-05    |
| ENSG00000269936 | MIR145         | 1.069249003 | 0.025199286 | ENSG00000188536 | HBA2    | 0.895873772 | 0.012064968 |
| ENSG00000260822 | GS1-358P8.4    | 1.069753212 | 0.001888873 | ENSG00000101452 | DHX35   | 0.895878878 | 4.22E-07    |
| ENSG00000237310 | GS1-124K5.4    | 1.06997037  | 0.000598256 | ENSG00000188015 | S100A3  | 0.89594767  | 0.00010478  |
| ENSG00000261572 | RP11-384L8.1   | 1.070347998 | 0.001053512 | ENSG00000164924 | YWHAZ   | 0.895978372 | 1.31E-11    |
| ENSG00000233237 | LINC00472      | 1.070475115 | 0.007588753 | ENSG00000074416 | MGLL    | 0.896005435 | 0.023748975 |
| ENSG00000258056 | RP11-644F5.11  | 1.070529844 | 0.000200466 | ENSG00000100285 | NEFH    | 0.896119592 | 4.03E-05    |
| ENSG00000233098 | RP11-344E13.3  | 1.07103239  | 0.018229262 | ENSG00000181744 | C3orf58 | 0.89621412  | 0.03128358  |
| ENSG00000259940 | CTD-3203P2.1   | 1.071661875 | 0.011590832 | ENSG00000081913 | PHLPP1  | 0.896349117 | 0.001517448 |
| ENSG00000204054 | LINC00963      | 1.071989429 | 0.000428048 | ENSG00000175416 | CLTB    | 0.896364432 | 0.00538646  |
| ENSG00000264469 | RP11-173M1.8   | 1.072020404 | 0.003938427 | ENSG00000069535 | MAOB    | 0.896454777 | 0.008430122 |
| ENSG00000012171 | SEMA3B         | 1.072239935 | 0.00170752  | ENSG00000088387 | DOCK9   | 0.896505792 | 0.000655017 |
| ENSG00000239569 | KMT2E-AS1      | 1.072381904 | 0.008342099 | ENSG00000183876 | ARSI    | 0.896538809 | 2.65E-05    |
| ENSG00000264859 | RP11-75N4.2    | 1.072457988 | 0.000574415 | ENSG00000111786 | SRSF9   | 0.896540798 | 4.14E-09    |
| ENSG00000226852 | RP1-212P9.2    | 1.072541015 | 0.01717677  | ENSG00000148180 | GSN     | 0.896553171 | 0.005274267 |
| ENSG00000270344 | RP11-734K2.4   | 1.072882421 | 0.012557887 | ENSG00000176422 | SPRYD4  | 0.896584453 | 6.60E-07    |
| ENSG00000254635 | WAC-AS1        | 1.073172876 | 0.004552082 | ENSG00000164402 | 8-Sep   | 0.89664979  | 1.63E-11    |
| ENSG00000270346 | RP1-90J20.12   | 1.073470986 | 0.003957976 | ENSG00000136754 | ABI1    | 0.896723163 | 6.78E-08    |
| ENSG00000233351 | RP1-69D17.3    | 1.073728781 | 0.040189261 | ENSG00000136021 | SCYL2   | 0.896740438 | 0.03157706  |
| ENSG00000272141 | RP11-465B22.8  | 1.073747267 | 0.002175671 | ENSG00000101384 | JAG1    | 0.896986503 | 0.000162872 |
| ENSG00000271151 | RP11-394I13.2  | 1.073957432 | 0.023142641 | ENSG00000075673 | ATP12A  | 0.897051154 | 0.004362796 |
| ENSG00000228315 | GUSBP11        | 1.073997535 | 0.017613392 | ENSG00000158477 | CD1A    | 0.897054475 | 0.008010603 |
| ENSG00000272341 | RP1-151F17.2   | 1.074050608 | 0.03458919  | ENSG00000160310 | PRMT2   | 0.897060105 | 2.17E-09    |
| ENSG00000249550 | RP11-438N16.1  | 1.074407457 | 0.000153513 | ENSG00000157837 | SPPL3   | 0.897106091 | 2.69E-10    |
| ENSG00000227053 | RP11-395B7.4   | 1.075266721 | 0.0005097   | ENSG00000172086 | KRCC1   | 0.897122446 | 0.002633081 |
| ENSG00000230325 | RP11-385F5.4   | 1.07539386  | 0.001938238 | ENSG00000100139 | MICALL1 | 0.89718051  | 0.010380226 |
| ENSG00000232995 | RP11-267N12.3  | 1.0760911   | 0.001937381 | ENSG00000121440 | PDZRN3  | 0.89723457  | 5.24E-11    |
| ENSG00000204282 | TNRC6C-AS1     | 1.076219607 | 0.007056325 | ENSG00000155755 | TMEM237 | 0.897244721 | 0.002107314 |
| ENSG00000186056 | MATN1-AS1      | 1.076264877 | 0.00032478  | ENSG00000074706 | IPCEF1  | 0.897424752 | 0.001725194 |
| ENSG00000259807 | RP11-426C22.4  | 1.076520363 | 0.001083328 | ENSG00000129473 | BCL2L2  | 0.897443111 | 0.02047214  |
| ENSG00000247400 | DNAJC3-AS1     | 1.077228683 | 0.001897541 | ENSG00000165912 | PACSIN3 | 0.89750665  | 0.011971808 |
| ENSG00000272361 | GS1-166A23.2   | 1.077733746 | 0.001152788 | ENSG00000109107 | ALDOC   | 0.897551015 | 0.017826018 |
| ENSG00000188070 | C11orf95       | 1.077975528 | 3.24E-05    | ENSG00000057657 | PRDM1   | 0.897563428 | 0.008062713 |
| ENSG00000253716 | RP13-582O9.5   | 1.078100526 | 0.000307113 | ENSG00000063660 | GPC1    | 0.897573448 | 0.002824431 |
| ENSG00000263753 | LINC00667      | 1.078310493 | 0.000930189 | ENSG00000100401 | RANGAP1 | 0.897634699 | 1.72E-11    |
| ENSG00000226752 | PSMD5-AS1      | 1.078647157 | 0.000250106 | ENSG00000104044 | OCA2    | 0.897644186 | 0.003135426 |
| ENSG00000259943 | RP1-39G22.7    | 1.079165744 | 0.002087582 | ENSG00000100577 | GSTZ1   | 0.897722746 | 1.38E-05    |

|                 |                |             |             |                 |          |             |             |
|-----------------|----------------|-------------|-------------|-----------------|----------|-------------|-------------|
| ENSG00000272010 | CTD-3025N20.3  | 1.079238741 | 0.013968384 | ENSG00000072778 | ACADVL   | 0.897778109 | 7.39E-08    |
| ENSG00000260081 | RP11-66N11.8   | 1.079834476 | 0.00070029  | ENSG00000159346 | ADIPOR1  | 0.89778492  | 0.001072394 |
| ENSG00000237753 | AC079922.3     | 1.079913252 | 7.42E-05    | ENSG00000135272 | MDFIC    | 0.897860672 | 0.023487332 |
| ENSG00000203706 | SERTAD4-AS1    | 1.079921644 | 0.004090624 | ENSG00000145241 | CENPC    | 0.897875198 | 3.24E-05    |
| ENSG00000247796 | CTD-2366F13.1  | 1.079974121 | 0.014281616 | ENSG00000135870 | RC3H1    | 0.897889372 | 1.19E-08    |
| ENSG00000259758 | CASC7          | 1.080517794 | 0.000962459 | ENSG00000134243 | SORT1    | 0.897891246 | 0.00175136  |
| ENSG00000174365 | SNHG11         | 1.081116496 | 2.90E-07    | ENSG00000154025 | SLC5A10  | 0.897954681 | 2.56E-08    |
| ENSG00000262294 | RP11-1260E13.2 | 1.08112931  | 0.002470012 | ENSG00000152642 | GPD1L    | 0.898021278 | 0.020229657 |
| ENSG00000269821 | KCNQ1OT1       | 1.081197614 | 0.000326935 | ENSG00000112679 | DUSP22   | 0.898055166 | 0.004285415 |
| ENSG00000262580 | RP11-334C17.5  | 1.081548794 | 0.028139225 | ENSG00000073282 | TP63     | 0.898057533 | 0.004359522 |
| ENSG00000265399 | RP13-270P17.2  | 1.081659425 | 0.000484051 | ENSG00000069020 | MAST4    | 0.898123656 | 0.005064479 |
| ENSG00000214293 | RBSN1L-AS1     | 1.082193976 | 0.000823563 | ENSG00000186442 | KRT3     | 0.89817874  | 0.00127414  |
| ENSG00000260400 | RP11-119F7.5   | 1.082312814 | 0.030456216 | ENSG00000115159 | GPD2     | 0.898294309 | 9.84E-08    |
| ENSG00000236081 | AC074389.9     | 1.082491409 | 0.009603388 | ENSG00000148498 | PARD3    | 0.898340501 | 0.000206591 |
| ENSG00000235501 | RP4-639F20.1   | 1.082663844 | 0.00174711  | ENSG00000136943 | CTSV     | 0.898476296 | 0.002042186 |
| ENSG00000234062 | RP11-308D16.4  | 1.083058008 | 0.000130221 | ENSG00000081026 | MAGI3    | 0.898492274 | 2.63E-09    |
| ENSG00000226496 | LINC00323      | 1.084146054 | 0.00054854  | ENSG00000139437 | TCHP     | 0.898542345 | 5.06E-08    |
| ENSG00000270061 | RP11-214K3.19  | 1.084488868 | 0.000267007 | ENSG00000117394 | SLC2A1   | 0.898592131 | 0.010834889 |
| ENSG00000272155 | RP11-707M3.3   | 1.084586188 | 0.003866063 | ENSG00000138071 | ACTR2    | 0.898659072 | 3.83E-09    |
| ENSG00000255135 | RP11-111M22.3  | 1.084806254 | 0.033966393 | ENSG00000160285 | LSS      | 0.898694814 | 0.001356146 |
| ENSG00000243004 | AC005062.2     | 1.084818892 | 0.000155468 | ENSG00000237521 | OR7E24   | 0.898716388 | 2.75E-06    |
| ENSG00000268220 | RP11-379K17.12 | 1.084953949 | 3.29E-05    | ENSG00000166171 | DPCD     | 0.898734418 | 5.64E-06    |
| ENSG00000261754 | CTC-523E23.1   | 1.085186299 | 0.01052284  | ENSG00000103966 | EHD4     | 0.898761817 | 2.85E-07    |
| ENSG00000223768 | LINC00205      | 1.085333092 | 0.009184892 | ENSG00000178184 | PARD6G   | 0.898783452 | 3.48E-11    |
| ENSG00000272745 | RP5-1007H16.1  | 1.085343348 | 0.0018872   | ENSG00000160796 | NBEAL2   | 0.898791071 | 1.75E-07    |
| ENSG00000241295 | ZBTB20-AS2     | 1.085404169 | 0.003295839 | ENSG00000170525 | PFKFB3   | 0.898836648 | 0.000111049 |
| ENSG00000267123 | CTD-2357A8.3   | 1.085750798 | 0.012053601 | ENSG00000049283 | EPN3     | 0.898851554 | 0.00029411  |
| ENSG00000270179 | RP11-159N11.4  | 1.086098747 | 0.033839725 | ENSG00000240747 | KRBOX1   | 0.898854122 | 1.15E-06    |
| ENSG00000258297 | RP11-658F2.8   | 1.086185533 | 0.000839938 | ENSG00000145780 | FEM1C    | 0.899034296 | 3.04E-06    |
| ENSG00000260942 | CAPN10-AS1     | 1.08676177  | 4.45E-05    | ENSG00000115556 | PLCD4    | 0.899041006 | 1.82E-08    |
| ENSG00000034063 | UHRF1          | 1.087033983 | 0.001648789 | ENSG00000109775 | UFSP2    | 0.899092064 | 1.57E-05    |
| ENSG00000271327 | RP11-1109F11.3 | 1.087315254 | 0.000786953 | ENSG00000197343 | ZNF655   | 0.899115929 | 0.000516913 |
| ENSG00000245937 | CTC-228N24.3   | 1.087330978 | 2.37E-06    | ENSG00000125648 | SLC25A23 | 0.899213166 | 6.00E-06    |
| ENSG00000273474 | RP11-295P9.12  | 1.087454981 | 0.002039354 | ENSG00000186350 | RXRA     | 0.899271058 | 0.010195879 |
| ENSG00000259894 | RP11-697E2.4   | 1.088193353 | 0.000247348 | ENSG00000185591 | SP1      | 0.899319863 | 0.001426478 |
| ENSG00000259865 | RP11-488L18.10 | 1.088266347 | 0.000549438 | ENSG00000213585 | VDAC1    | 0.899374686 | 1.24E-06    |
| ENSG00000231312 | AC007246.3     | 1.088876212 | 0.002766231 | ENSG00000100852 | ARHGAP5  | 0.899474553 | 8.21E-06    |
| ENSG00000248275 | TRIM52-AS1     | 1.089059115 | 1.70E-06    | ENSG00000198001 | IRAK4    | 0.899506706 | 3.16E-09    |
| ENSG00000267745 | RP11-686D22.8  | 1.089561898 | 0.001428889 | ENSG00000136810 | TXN      | 0.899577721 | 1.21E-05    |
| ENSG00000259959 | RP11-121C2.2   | 1.089656327 | 0.012617409 | ENSG00000261115 | TMEM178B | 0.899652051 | 0.003081784 |
| ENSG00000271259 | RP11-1109F11.5 | 1.089788103 | 0.001257525 | ENSG00000169612 | FAM103A1 | 0.899654561 | 1.39E-07    |
| ENSG00000223779 | RP11-403I13.4  | 1.08999527  | 0.000501885 | ENSG00000171444 | MCC      | 0.899719303 | 0.00017151  |
| ENSG00000272565 | RP11-485G4.2   | 1.090011382 | 0.000909682 | ENSG00000141034 | GID4     | 0.89972339  | 0.005420729 |
| ENSG00000225062 | AC021016.6     | 1.090156954 | 1.29E-05    | ENSG00000198805 | PNP      | 0.899730129 | 2.98E-06    |
| ENSG00000272711 | RP11-259N19.1  | 1.09016686  | 9.35E-05    | ENSG00000123595 | RAB9A    | 0.899768105 | 0.013200559 |
| ENSG00000262194 | CTD-3195I5.5   | 1.090733136 | 0.002134348 | ENSG00000077713 | SLC25A43 | 0.899782728 | 0.000178405 |
| ENSG00000273033 | RP11-67L2.2    | 1.090885058 | 0.000974548 | ENSG00000108759 | KRT32    | 0.899801491 | 0.003968052 |

|                 |                   |             |             |                 |                  |             |             |
|-----------------|-------------------|-------------|-------------|-----------------|------------------|-------------|-------------|
| ENSG00000272086 | CTD-2186M15.3     | 1.090946196 | 0.016548265 | ENSG00000103381 | CPPED1           | 0.899853245 | 0.034910065 |
| ENSG00000234608 | MAPKAPK5-AS1      | 1.091083365 | 0.013550741 | ENSG00000114948 | ADAM23           | 0.899867413 | 0.000689025 |
| ENSG00000226419 | SLC16A1-AS1       | 1.091249805 | 0.005284    | ENSG00000132965 | ALOX5AP          | 0.899888259 | 0.000660535 |
| ENSG00000247572 | CKMT2-AS1         | 1.091396907 | 0.000341019 | ENSG00000071205 | ARHGAP10         | 0.899904185 | 0.004494236 |
| ENSG00000246067 | RAB30-AS1         | 1.091870109 | 0.002045579 | ENSG00000168476 | REEP4            | 0.89996379  | 1.01E-08    |
| ENSG00000247134 | RP11-11N9.4       | 1.092118021 | 0.033590083 | ENSG00000141627 | DYM              | 0.899991826 | 0.000296463 |
| ENSG00000263970 | RP11-789C17.5     | 1.092128665 | 0.000203661 | ENSG00000136002 | ARHGEF4          | 0.900016347 | 0.000170183 |
| ENSG00000272732 | RP5-1159O4.2      | 1.092570724 | 0.003556587 | ENSG00000153048 | CARHSP1          | 0.900061751 | 0.014112733 |
| ENSG00000227502 | RP1-249H1.4       | 1.092908481 | 0.010047425 | ENSG00000134504 | KCTD1            | 0.900129885 | 1.23E-08    |
| ENSG00000230068 | CDC42-IT1         | 1.092990259 | 0.001289528 | ENSG00000221843 | C2orf16          | 0.900214217 | 8.79E-09    |
| ENSG00000226091 | LINC00937         | 1.093893481 | 0.029084792 | ENSG00000198573 | SPANXC           | 0.900295469 | 0.001426855 |
| ENSG00000175701 | LINC00116         | 1.094125043 | 0.00023286  | ENSG00000105855 | ITGB8            | 0.900342959 | 0.009613582 |
| ENSG00000267280 | RP11-332H18.4     | 1.094441184 | 0.001358    | ENSG00000137880 | GCHFR            | 0.900359488 | 0.000988455 |
| ENSG00000272872 | LL22NC03-N14H11.1 | 1.094551491 | 0.000477834 | ENSG00000065559 | MAP2K4           | 0.900369798 | 0.013024595 |
| ENSG00000235989 | MORC2-AS1         | 1.094722503 | 4.83E-05    | ENSG00000140939 | NOL3             | 0.900438304 | 0.000816046 |
| ENSG00000251580 | RP11-539L10.3     | 1.094764917 | 0.017405845 | ENSG00000164707 | SLC13A4          | 0.900454965 | 0.006528236 |
| ENSG00000248161 | RP11-499E18.1     | 1.095840217 | 0.00085284  | ENSG00000161642 | ZNF385A          | 0.900475143 | 6.69E-06    |
| ENSG00000269640 | CTD-2521M24.9     | 1.096092345 | 0.003577192 | ENSG00000102007 | PLP2             | 0.900489887 | 0.007443133 |
| ENSG00000263335 | AF001548.5        | 1.096615866 | 0.044710353 | ENSG00000147509 | RGS20            | 0.900502022 | 0.008675388 |
| ENSG00000270426 | RP11-326I11.5     | 1.097321671 | 0.001018119 | ENSG00000167194 | C16orf92         | 0.900506982 | 6.39E-09    |
| ENSG00000273059 | XXyac-YX155B6.7   | 1.097479045 | 0.001532557 | ENSG00000172663 | TMEM134          | 0.900508719 | 0.006351151 |
| ENSG00000272760 | RP11-5C23.1       | 1.097775528 | 0.001256216 | ENSG00000172345 | STARD5           | 0.900616796 | 0.010203673 |
| ENSG00000273247 | RP11-83A24.2      | 1.098261341 | 0.004381657 | ENSG00000159314 | ARHGAP27         | 0.900658896 | 1.64E-08    |
| ENSG00000262001 | DLGAP1-AS2        | 1.098335157 | 0.00027516  | ENSG00000129474 | AJUBA            | 0.900659238 | 0.00084313  |
| ENSG00000260261 | RP11-480A16.1     | 1.098550748 | 9.68E-05    | ENSG00000113163 | COL4A3BP         | 0.900694546 | 1.07E-08    |
| ENSG00000261799 | RP11-283I3.6      | 1.098612377 | 0.029127426 | ENSG00000072364 | AFF4             | 0.900724198 | 0.025695163 |
| ENSG00000246695 | RASSF8-AS1        | 1.099081014 | 0.008273813 | ENSG00000129353 | SLC44A2          | 0.900732524 | 4.79E-09    |
| ENSG00000272593 | RP11-339B21.11    | 1.099114037 | 0.000118109 | ENSG00000168703 | WFDC12           | 0.900737882 | 0.003526283 |
| ENSG00000270170 | NCBP2-AS2         | 1.099434892 | 3.91E-07    | ENSG00000178726 | THBD             | 0.900776879 | 0.041719767 |
| ENSG00000267049 | AC002398.13       | 1.099972901 | 0.022745877 | ENSG00000170425 | ADORA2B          | 0.900789262 | 0.033798398 |
| ENSG00000260878 | RP11-320H14.1     | 1.100082881 | 0.004957918 | ENSG00000241685 | ARPC1A           | 0.900843018 | 7.64E-06    |
| ENSG00000204860 | FAM201A           | 1.100476258 | 0.012192142 | ENSG00000167460 | TPM4             | 0.900903373 | 0.00411812  |
| ENSG00000273066 | RP11-216L13.19    | 1.100554625 | 0.000919159 | ENSG00000115226 | FNDC4            | 0.900992266 | 0.0098657   |
| ENSG00000272576 | RP11-365H22.2     | 1.100715456 | 0.002369026 | ENSG00000198742 | SMURF1           | 0.901004135 | 1.92E-08    |
| ENSG00000272906 | RP11-533E19.7     | 1.100793645 | 0.006331687 | ENSG00000166855 | CLPX             | 0.901010782 | 1.86E-06    |
| ENSG00000223482 | NUTM2A-AS1        | 1.100812819 | 3.97E-05    | ENSG00000170606 | HSPA4            | 0.901018121 | 2.44E-07    |
| ENSG00000245910 | SNHG6             | 1.101576267 | 6.70E-07    | ENSG00000182400 | TRAPPC6B         | 0.901098454 | 0.000234348 |
| ENSG00000230606 | AC159540.1        | 1.101618555 | 0.012739195 | ENSG00000159461 | AMFR             | 0.901180734 | 7.45E-05    |
| ENSG00000253948 | RP11-410L14.2     | 1.101960395 | 0.000468241 | ENSG00000218357 | LL22NC03-75H12.2 | 0.901221493 | 3.87E-10    |
| ENSG00000233178 | RP11-88I18.2      | 1.103452284 | 0.012854546 | ENSG00000133477 | FAM83F           | 0.901319988 | 0.000163716 |
| ENSG00000251169 | AC005355.2        | 1.103571071 | 0.000683884 | ENSG00000113643 | RARS             | 0.90132645  | 3.31E-06    |
| ENSG00000272917 | RP11-705C15.5     | 1.10380081  | 0.016286237 | ENSG00000109270 | LAMTOR3          | 0.901562864 | 4.24E-07    |
| ENSG00000250899 | RP11-253E3.3      | 1.103849879 | 0.039278975 | ENSG00000141971 | MVB12A           | 0.901766777 | 4.65E-05    |
| ENSG00000246089 | RP11-115C21.2     | 1.104313451 | 0.00962025  | ENSG00000172432 | GTPBP2           | 0.901771103 | 6.65E-09    |
| ENSG00000260084 | RP11-615I2.1      | 1.104340777 | 0.010576771 | ENSG00000116991 | SIPA1L2          | 0.901774956 | 0.001856119 |
| ENSG00000272335 | RP11-53O19.3      | 1.104377523 | 0.000342835 | ENSG00000156298 | TSPAN7           | 0.901787848 | 0.043059429 |
| ENSG00000267034 | RP11-384O8.1      | 1.104427669 | 0.035219062 | ENSG00000076685 | NT5C2            | 0.901834455 | 5.98E-05    |

|                 |                   |             |             |                 |          |             |             |
|-----------------|-------------------|-------------|-------------|-----------------|----------|-------------|-------------|
| ENSG00000229404 | LINC00858         | 1.105254922 | 0.002005313 | ENSG00000119950 | MXI1     | 0.901842533 | 0.012757546 |
| ENSG00000261713 | SSTR5-AS1         | 1.105706523 | 0.022322453 | ENSG00000103316 | CRYM     | 0.901978031 | 0.000548889 |
| ENSG00000270189 | RP11-258C19.7     | 1.106158927 | 8.14E-05    | ENSG00000169118 | CSNK1G1  | 0.901990726 | 9.89E-12    |
| ENSG00000229841 | RP11-361K17.2     | 1.106314415 | 0.006099145 | ENSG00000196605 | ZNF846   | 0.902025772 | 8.46E-06    |
| ENSG00000272796 | RP1-74M1.3        | 1.106354739 | 0.010246269 | ENSG00000082497 | SERTAD4  | 0.902027527 | 0.009197546 |
| ENSG00000261597 | RP11-353B9.1      | 1.109132391 | 3.19E-05    | ENSG00000054356 | PTPRN    | 0.902048871 | 1.92E-07    |
| ENSG00000236778 | INTS6-AS1         | 1.110981276 | 0.008390067 | ENSG00000134574 | DDB2     | 0.902084985 | 8.80E-06    |
| ENSG00000243008 | RP11-556N21.1     | 1.111100116 | 0.029835333 | ENSG00000197579 | TOPORS   | 0.902182043 | 0.000895298 |
| ENSG00000238142 | RP11-108M9.4      | 1.111843612 | 3.94E-05    | ENSG00000147383 | NSDHL    | 0.902202526 | 0.032593268 |
| ENSG00000272065 | U91328.20         | 1.111871898 | 0.001071747 | ENSG00000151474 | FRMD4A   | 0.902210277 | 7.37E-08    |
| ENSG00000230002 | ALMS1-IT1         | 1.11189106  | 0.003056709 | ENSG00000168243 | GNG4     | 0.902215787 | 0.008809371 |
| ENSG00000272909 | CTD-2555O16.4     | 1.111941286 | 1.87E-05    | ENSG00000181896 | ZNF101   | 0.902221353 | 0.001844498 |
| ENSG00000261654 | RP11-96K19.4      | 1.111946949 | 0.000680165 | ENSG00000113712 | CSNK1A1  | 0.902245829 | 2.13E-11    |
| ENSG00000239213 | RP11-85F14.5      | 1.113772579 | 3.87E-06    | ENSG00000111186 | WNT5B    | 0.902246785 | 0.008711585 |
| ENSG00000271614 | LINC00936         | 1.113842867 | 8.56E-05    | ENSG00000102554 | KLF5     | 0.902256102 | 1.71E-06    |
| ENSG00000243766 | HOTTIP            | 1.114709205 | 0.003820274 | ENSG00000162413 | KLHL21   | 0.902345204 | 0.007256516 |
| ENSG00000271133 | CTA-293F17.1      | 1.114720515 | 3.52E-06    | ENSG00000165300 | SLITRK5  | 0.902556385 | 1.26E-05    |
| ENSG00000271895 | RP4-635E18.8      | 1.114865829 | 0.001851278 | ENSG00000129657 | SEC14L1  | 0.902590151 | 2.06E-07    |
| ENSG00000196756 | SNHG17            | 1.1162033   | 0.000427629 | ENSG00000116260 | QSOX1    | 0.902615948 | 0.000272067 |
| ENSG00000261488 | RP11-757F18.5     | 1.116337636 | 5.22E-05    | ENSG00000170854 | MINA     | 0.902721603 | 0.03140817  |
| ENSG00000273131 | RP6-42F4.1        | 1.116467897 | 0.010274813 | ENSG00000189337 | KAZN     | 0.902754579 | 0.001165395 |
| ENSG00000270190 | RP11-803D5.4      | 1.116729262 | 0.039654862 | ENSG00000111652 | COPS7A   | 0.902784164 | 3.80E-07    |
| ENSG00000270949 | RP11-288H12.4     | 1.116826332 | 0.001360141 | ENSG00000075711 | DLG1     | 0.902816693 | 0.034105674 |
| ENSG00000224699 | LAMTOR5-AS1       | 1.117112695 | 0.001107844 | ENSG00000107362 | ABHD17B  | 0.902838603 | 0.002989348 |
| ENSG00000247982 | LINC00926         | 1.117336465 | 9.81E-05    | ENSG00000100503 | NIN      | 0.902846725 | 2.97E-05    |
| ENSG00000272221 | XXbac-BPG181B23.7 | 1.118043035 | 0.000364717 | ENSG00000145911 | N4BP3    | 0.902849045 | 0.000142345 |
| ENSG00000259673 | IQCH-AS1          | 1.118075988 | 0.000688543 | ENSG00000018408 | WWTR1    | 0.90286323  | 0.02081552  |
| ENSG00000272288 | RP11-140K17.3     | 1.118648199 | 2.46E-05    | ENSG00000119866 | BCL11A   | 0.903005455 | 0.001571955 |
| ENSG00000251136 | RP11-37B2.1       | 1.118892332 | 2.79E-05    | ENSG00000168481 | LGI3     | 0.903010194 | 4.64E-11    |
| ENSG00000186019 | AC084219.4        | 1.119376764 | 0.025384923 | ENSG00000159208 | C1orf51  | 0.903062212 | 0.013164029 |
| ENSG00000260391 | RP11-71H17.7      | 1.119496601 | 0.013624348 | ENSG00000125089 | SH3TC1   | 0.903145016 | 7.96E-06    |
| ENSG00000272599 | RP11-152N13.16    | 1.119649698 | 0.007301683 | ENSG00000179454 | KLHL28   | 0.90319008  | 0.000265541 |
| ENSG00000264247 | LINC00909         | 1.11969186  | 0.000367167 | ENSG00000186716 | BCR      | 0.903307291 | 2.61E-07    |
| ENSG00000237523 | LINC00857         | 1.120192675 | 0.000118595 | ENSG00000092445 | TYRO3    | 0.903410847 | 0.001526219 |
| ENSG00000214401 | KANSL1-AS1        | 1.120990472 | 0.001304007 | ENSG00000148110 | HIATL1   | 0.903413478 | 6.97E-11    |
| ENSG00000262772 | RP11-353N14.2     | 1.121766283 | 0.015898083 | ENSG00000052802 | MSMO1    | 0.903419012 | 0.000101244 |
| ENSG00000271204 | RP11-138A9.1      | 1.121983231 | 0.00160764  | ENSG00000175087 | PDIK1L   | 0.903426717 | 4.69E-06    |
| ENSG00000272219 | CTB-181H17.1      | 1.122049782 | 0.007157165 | ENSG00000131931 | THAP1    | 0.903619674 | 0.004746783 |
| ENSG00000260423 | RP13-735L24.1     | 1.123518367 | 0.004794699 | ENSG00000106351 | AGFG2    | 0.903659439 | 0.001013653 |
| ENSG00000231607 | DLEU2             | 1.12352047  | 0.000553458 | ENSG00000118564 | FBXL5    | 0.90370962  | 4.65E-09    |
| ENSG00000257702 | LBX2-AS1          | 1.123643731 | 8.39E-07    | ENSG00000158406 | HIST1H4H | 0.903726191 | 0.000838614 |
| ENSG00000226645 | AP006216.10       | 1.124464074 | 0.000213132 | ENSG00000196189 | SEMA4A   | 0.903784315 | 0.006931862 |
| ENSG00000268713 | CTC-444N24.8      | 1.124538908 | 6.20E-05    | ENSG00000140332 | TLE3     | 0.90394149  | 0.011695041 |
| ENSG00000260160 | CTC-471J1.2       | 1.125759593 | 0.006269048 | ENSG00000153250 | RBMS1    | 0.903949409 | 0.000328889 |
| ENSG00000179523 | EIF3J-AS1         | 1.126529522 | 0.000310888 | ENSG00000130173 | C19orf80 | 0.904031488 | 2.51E-07    |
| ENSG00000227258 | SMIM2-AS1         | 1.126751477 | 0.001360673 | ENSG00000235098 | ANKRD65  | 0.904048803 | 8.91E-11    |
| ENSG00000261526 | CTB-31O20.2       | 1.127185395 | 5.41E-06    | ENSG00000174238 | PITPNA   | 0.904062491 | 0.000489295 |

|                 |                |             |             |                 |            |             |             |
|-----------------|----------------|-------------|-------------|-----------------|------------|-------------|-------------|
| ENSG00000257698 | RP11-620J15.3  | 1.129160799 | 0.000123694 | ENSG00000085511 | MAP3K4     | 0.90424587  | 2.10E-06    |
| ENSG00000270173 | RP11-382B18.4  | 1.129244041 | 0.001322597 | ENSG00000204186 | ZDBF2      | 0.904264551 | 0.00204364  |
| ENSG00000272913 | RP11-440D17.3  | 1.130255624 | 1.40E-07    | ENSG00000188171 | ZNF626     | 0.904267748 | 2.03E-12    |
| ENSG00000261188 | CTA-445C9.14   | 1.131240579 | 0.001534768 | ENSG00000167699 | GLOD4      | 0.904300709 | 1.91E-07    |
| ENSG00000204815 | TTC25          | 1.131461193 | 5.19E-06    | ENSG00000185112 | FAM43A     | 0.904374065 | 0.003633551 |
| ENSG00000230844 | ZNF674-AS1     | 1.131848518 | 4.58E-06    | ENSG00000160439 | RDH13      | 0.904578354 | 1.32E-05    |
| ENSG00000263320 | RP11-498D10.6  | 1.131944882 | 1.53E-05    | ENSG00000258664 | IFRG15     | 0.904599678 | 0.001346027 |
| ENSG00000246526 | RP11-539L10.2  | 1.132253703 | 3.24E-05    | ENSG00000152672 | CLEC4F     | 0.904639015 | 2.30E-07    |
| ENSG00000257303 | RP11-977G19.11 | 1.132669539 | 0.001855282 | ENSG00000111707 | SUDS3      | 0.904660533 | 3.81E-09    |
| ENSG00000266469 | CTB-131K11.1   | 1.133065486 | 0.001625897 | ENSG00000012983 | MAP4K5     | 0.904685702 | 0.042331974 |
| ENSG00000260236 | RP11-708J19.1  | 1.134049226 | 7.55E-06    | ENSG00000111796 | KLRB1      | 0.90469938  | 0.035526994 |
| ENSG00000261468 | RP11-1024P17.1 | 1.134129051 | 0.000591129 | ENSG00000178585 | CTNNBIP1   | 0.904780587 | 0.000165968 |
| ENSG00000261541 | RP11-626K17.3  | 1.134413371 | 0.001161798 | ENSG00000134590 | FAM127A    | 0.904787608 | 0.001904836 |
| ENSG00000272256 | RP11-489E7.4   | 1.135267964 | 0.004597048 | ENSG00000171109 | MFN1       | 0.904879366 | 2.36E-05    |
| ENSG00000232694 | XX-CR54.3      | 1.136033485 | 0.004677845 | ENSG00000196083 | IL1RAP     | 0.904883904 | 0.000189457 |
| ENSG00000088970 | PLK1S1         | 1.136263809 | 1.02E-05    | ENSG00000169860 | P2RY1      | 0.904891723 | 0.004022371 |
| ENSG00000240990 | HOXA11-AS      | 1.136770781 | 0.001684762 | ENSG00000003989 | SLC7A2     | 0.904990923 | 1.46E-08    |
| ENSG00000272666 | CTA-384D8.35   | 1.137436214 | 0.00250835  | ENSG00000163162 | RNF149     | 0.905165355 | 1.23E-05    |
| ENSG00000223960 | AC009948.5     | 1.139511401 | 0.001585496 | ENSG00000088280 | ASAP3      | 0.905178215 | 0.003000678 |
| ENSG00000250742 | RP11-834C11.4  | 1.13971973  | 0.005087242 | ENSG00000166394 | CYB5R2     | 0.905178329 | 0.000333282 |
| ENSG00000215417 | MIR17HG        | 1.14059581  | 0.00171094  | ENSG00000164975 | SNAPC3     | 0.905236986 | 1.53E-05    |
| ENSG00000234155 | RP11-30P6.6    | 1.14084407  | 0.002027634 | ENSG00000221988 | PPT2       | 0.905270464 | 5.46E-09    |
| ENSG00000236709 | DAPK1-IT1      | 1.141311219 | 0.002485025 | ENSG00000168032 | ENTPD3     | 0.905275036 | 0.034175787 |
| ENSG00000245556 | CTD-2037K23.2  | 1.142237516 | 1.15E-07    | ENSG00000147465 | STAR       | 0.905298027 | 0.000582408 |
| ENSG00000261455 | LINC01003      | 1.14311244  | 0.000282829 | ENSG00000107854 | TNKS2      | 0.905330407 | 1.45E-06    |
| ENSG00000270081 | RP5-935K16.1   | 1.143673909 | 1.44E-06    | ENSG00000113282 | CLINT1     | 0.905378748 | 1.38E-06    |
| ENSG00000244649 | CTD-2377D24.6  | 1.14432747  | 0.005580365 | ENSG00000197329 | PELI1      | 0.90543114  | 0.000179193 |
| ENSG00000272807 | RP11-260M2.1   | 1.144647642 | 0.000339541 | ENSG00000070614 | NDST1      | 0.90543843  | 0.001162345 |
| ENSG00000261135 | RP4-798A10.7   | 1.145309421 | 2.71E-05    | ENSG00000182831 | C16orf72   | 0.905481397 | 1.19E-06    |
| ENSG00000215190 | LINC00680      | 1.145763052 | 1.97E-05    | ENSG00000075624 | ACTB       | 0.905548227 | 4.77E-09    |
| ENSG00000234290 | AC116366.6     | 1.147071089 | 3.15E-05    | ENSG00000187764 | SEMA4D     | 0.905561384 | 5.04E-06    |
| ENSG00000260118 | RP6-201G10.2   | 1.147658729 | 3.64E-05    | ENSG00000173156 | RHOD       | 0.905715186 | 0.015108375 |
| ENSG00000182648 | LINC01006      | 1.149558628 | 3.41E-05    | ENSG00000170677 | SOCS6      | 0.905735632 | 0.002414973 |
| ENSG00000271941 | RP11-188P20.3  | 1.150635612 | 0.001633063 | ENSG00000008282 | SYPL1      | 0.905753095 | 0.013336128 |
| ENSG00000236537 | RP11-732M18.3  | 1.151189272 | 4.69E-05    | ENSG00000178988 | MRFAP1L1   | 0.905763932 | 7.75E-06    |
| ENSG00000260317 | RP11-48B3.4    | 1.151560467 | 0.000628405 | ENSG00000181467 | RAP2B      | 0.905810895 | 1.74E-06    |
| ENSG00000226471 | CTA-292E10.6   | 1.152860609 | 2.28E-05    | ENSG00000184719 | RNLS       | 0.905827802 | 5.60E-07    |
| ENSG00000152268 | SPON1          | 1.153317051 | 0.003063272 | ENSG00000070731 | ST6GALNAC2 | 0.905886926 | 0.002997413 |
| ENSG00000273156 | RP11-127B20.2  | 1.154105728 | 0.001280675 | ENSG00000166578 | IQCD       | 0.905949574 | 0.01039271  |
| ENSG00000224822 | THRB-IT1       | 1.154381719 | 0.0055972   | ENSG00000108840 | HDAC5      | 0.90595303  | 0.003703628 |
| ENSG00000265666 | CTD-2267D19.2  | 1.154834894 | 0.000133623 | ENSG00000176087 | SLC35A4    | 0.906142548 | 4.79E-09    |
| ENSG00000231806 | PCAT7          | 1.155210247 | 2.28E-05    | ENSG00000173914 | RBM4B      | 0.906146817 | 5.90E-07    |
| ENSG00000225265 | RP11-378J18.3  | 1.155610119 | 2.84E-05    | ENSG00000155313 | USP25      | 0.906177918 | 0.010912525 |
| ENSG00000242207 | HOXB-AS4       | 1.155996773 | 5.37E-05    | ENSG00000111752 | PHC1       | 0.906244315 | 0.001114036 |
| ENSG00000273190 | RP11-255C15.4  | 1.157099138 | 0.003380959 | ENSG00000088538 | DOCK3      | 0.90624592  | 0.043332861 |
| ENSG00000231013 | AC013275.2     | 1.157290314 | 0.005671994 | ENSG00000119636 | CCDC176    | 0.906246923 | 0.005155393 |
| ENSG00000253522 | MIR146A        | 1.15866387  | 0.000421389 | ENSG00000106123 | EPHB6      | 0.90634886  | 0.009646426 |

|                 |                |             |             |                 |          |             |             |
|-----------------|----------------|-------------|-------------|-----------------|----------|-------------|-------------|
| ENSG00000206337 | HCP5           | 1.158949151 | 0.010264065 | ENSG00000129235 | TXNDC17  | 0.906484613 | 1.61E-09    |
| ENSG00000260766 | RP11-226L15.5  | 1.15996705  | 6.35E-08    | ENSG00000089505 | CMTM1    | 0.90656393  | 1.64E-06    |
| ENSG00000272489 | RP11-182L21.5  | 1.160222607 | 0.000622354 | ENSG00000104332 | SFRP1    | 0.906615835 | 0.006702146 |
| ENSG00000260708 | CTA-29F11.1    | 1.160365718 | 1.60E-05    | ENSG00000186918 | ZNF395   | 0.906621054 | 6.20E-07    |
| ENSG00000254631 | RP11-702H23.4  | 1.161084266 | 0.000174163 | ENSG00000165698 | C9orf9   | 0.906627041 | 0.000527792 |
| ENSG00000269906 | RP11-248J18.2  | 1.161906939 | 0.000594494 | ENSG00000145990 | GFOD1    | 0.906658847 | 0.009470978 |
| ENSG00000260418 | RP3-406A7.7    | 1.164201846 | 0.001039052 | ENSG00000032444 | PNPLA6   | 0.906684773 | 3.63E-05    |
| ENSG00000188206 | HNRNPU-AS1     | 1.165240862 | 0.000577288 | ENSG00000118620 | ZNF430   | 0.906756326 | 0.005982038 |
| ENSG00000245149 | RNF139-AS1     | 1.165246576 | 0.00844759  | ENSG00000100554 | ATP6V1D  | 0.906785518 | 0.000803978 |
| ENSG00000267128 | RNF157-AS1     | 1.165478443 | 0.010298084 | ENSG00000184292 | TACSTD2  | 0.9068081   | 1.33E-06    |
| ENSG00000256234 | RP11-283G6.4   | 1.167627122 | 0.037799695 | ENSG00000134250 | NOTCH2   | 0.906852304 | 0.000799315 |
| ENSG00000272077 | RP11-348P10.2  | 1.168055964 | 1.07E-07    | ENSG00000105784 | RUNDC3B  | 0.906911852 | 0.00980803  |
| ENSG00000255153 | TOLLIP-AS1     | 1.169455487 | 5.12E-05    | ENSG00000006831 | ADIPOR2  | 0.906930487 | 9.40E-06    |
| ENSG00000204528 | PSORS1C3       | 1.170621605 | 0.000392718 | ENSG00000099219 | ERMP1    | 0.90693128  | 0.014512061 |
| ENSG00000260711 | RP11-747H7.3   | 1.17159108  | 7.79E-05    | ENSG00000115590 | IL1R2    | 0.906981953 | 0.032781691 |
| ENSG00000269911 | FAM226B        | 1.172237777 | 0.007278419 | ENSG00000174775 | HRAS     | 0.90698873  | 0.011900494 |
| ENSG00000225470 | JPX            | 1.173106296 | 4.41E-05    | ENSG00000168769 | TET2     | 0.906998835 | 2.11E-07    |
| ENSG00000237036 | ZEB1-AS1       | 1.175122263 | 0.000122121 | ENSG00000112419 | PHACTR2  | 0.907039723 | 1.19E-05    |
| ENSG00000254290 | RP11-150O12.3  | 1.175445411 | 0.000340165 | ENSG00000104497 | SNX16    | 0.907097982 | 0.048612948 |
| ENSG00000235106 | LINC00094      | 1.176119074 | 4.23E-05    | ENSG00000178974 | FBXO34   | 0.907156164 | 0.010511507 |
| ENSG00000254837 | AP001372.2     | 1.17857991  | 0.000195461 | ENSG00000109929 | SC5D     | 0.907195199 | 0.044310486 |
| ENSG00000238279 | BX470102.3     | 1.178666056 | 0.001479115 | ENSG00000188822 | CNR2     | 0.907259094 | 2.10E-05    |
| ENSG00000269983 | RP11-497H16.9  | 1.179730942 | 4.36E-06    | ENSG00000107738 | C10orf54 | 0.907280041 | 3.64E-05    |
| ENSG00000267519 | MIR24-2        | 1.180458199 | 3.62E-07    | ENSG00000119541 | VPS4B    | 0.907310251 | 0.019997611 |
| ENSG00000272763 | RP11-357H14.17 | 1.180514818 | 1.60E-06    | ENSG00000180592 | SKIDA1   | 0.907338081 | 1.33E-08    |
| ENSG00000167912 | RP11-25K19.1   | 1.180580916 | 0.000291855 | ENSG00000165996 | PTPLA    | 0.90737002  | 0.002056431 |
| ENSG00000235919 | ASH1L-AS1      | 1.181403803 | 2.68E-09    | ENSG00000249915 | PDCD6    | 0.907456449 | 0.013662797 |
| ENSG00000272301 | RP11-111M22.4  | 1.181786128 | 1.14E-05    | ENSG00000164841 | TMEM74   | 0.907591568 | 8.43E-07    |
| ENSG00000228106 | RP11-452F19.3  | 1.183478774 | 9.76E-09    | ENSG00000144566 | RAB5A    | 0.90768646  | 1.75E-10    |
| ENSG00000257660 | RP11-579D7.4   | 1.184540474 | 3.77E-06    | ENSG00000173198 | CYSLTR1  | 0.907703392 | 0.028424904 |
| ENSG00000236943 | RP11-640M9.1   | 1.186985588 | 1.96E-06    | ENSG00000149313 | AASDHPPT | 0.907800315 | 4.22E-07    |
| ENSG00000228742 | RP5-884M6.1    | 1.187978635 | 0.000698044 | ENSG00000166401 | SERPINB8 | 0.907904829 | 0.031358934 |
| ENSG00000245970 | KB-1208A12.3   | 1.189128494 | 1.66E-07    | ENSG00000100739 | BDKRB1   | 0.908034463 | 0.005064634 |
| ENSG00000261254 | RP4-714D9.5    | 1.189522229 | 0.000113828 | ENSG00000141380 | SS18     | 0.908142087 | 6.92E-05    |
| ENSG00000230082 | PRRT3-AS1      | 1.193319111 | 0.000107293 | ENSG00000197774 | EME2     | 0.908154372 | 2.17E-05    |
| ENSG00000260704 | LINC00543      | 1.193756793 | 7.35E-05    | ENSG00000171812 | COL8A2   | 0.908163255 | 3.11E-07    |
| ENSG00000264207 | RP11-196G18.23 | 1.193868175 | 3.81E-05    | ENSG00000106780 | MEGF9    | 0.908176548 | 0.004006433 |
| ENSG00000262251 | RP11-199F11.2  | 1.196368804 | 1.07E-07    | ENSG00000143367 | TUFT1    | 0.908208959 | 0.026734188 |
| ENSG00000225791 | TRAM2-AS1      | 1.196448211 | 1.50E-07    | ENSG00000072401 | UBE2D1   | 0.90823771  | 0.001704518 |
| ENSG00000260941 | LINC00622      | 1.200288809 | 0.002026431 | ENSG00000163393 | SLC22A15 | 0.908296846 | 0.004879891 |
| ENSG00000260244 | RP11-588K22.2  | 1.20253483  | 1.56E-05    | ENSG00000013306 | SLC25A39 | 0.908305311 | 1.53E-05    |
| ENSG00000254231 | CTD-2284J15.1  | 1.202771053 | 0.000327467 | ENSG00000177731 | FLII     | 0.90833537  | 0.002978403 |
| ENSG00000260805 | RP11-61J19.4   | 1.202937212 | 0.000204237 | ENSG00000119402 | FBXW2    | 0.908340914 | 7.15E-05    |
| ENSG00000259953 | RP11-4O1.2     | 1.204815382 | 2.04E-10    | ENSG00000134294 | SLC38A2  | 0.908364364 | 1.03E-07    |
| ENSG00000146666 | LINC00525      | 1.205044764 | 0.000635155 | ENSG00000166503 | HGDFRP3  | 0.908426704 | 4.30E-06    |
| ENSG00000228037 | RP3-395M20.9   | 1.207690385 | 7.67E-07    | ENSG00000187860 | CCDC157  | 0.908438006 | 2.19E-07    |
| ENSG00000264575 | LINC00526      | 1.207971201 | 5.25E-07    | ENSG00000101935 | AMMECR1  | 0.908451572 | 6.11E-07    |

|                 |                 |             |             |                 |           |             |             |
|-----------------|-----------------|-------------|-------------|-----------------|-----------|-------------|-------------|
| ENSG00000234912 | LINC00338       | 1.210231698 | 8.52E-08    | ENSG00000108576 | SLC6A4    | 0.908477653 | 0.005353604 |
| ENSG00000254369 | HOXA-AS3        | 1.211910249 | 3.04E-05    | ENSG00000137203 | TFAP2A    | 0.908484723 | 0.014465677 |
| ENSG00000232874 | RP11-135A1.2    | 1.214074159 | 1.90E-05    | ENSG00000128923 | FAM63B    | 0.908521724 | 7.10E-05    |
| ENSG00000234494 | AC003665.1      | 1.216237809 | 5.87E-05    | ENSG00000163624 | CDS1      | 0.908562052 | 2.55E-06    |
| ENSG00000261061 | RP11-303E16.2   | 1.219042851 | 4.10E-07    | ENSG00000198157 | HMGNS     | 0.908563091 | 0.000981047 |
| ENSG00000231770 | TMEM44-AS1      | 1.223744511 | 3.73E-08    | ENSG00000179833 | SERTAD2   | 0.908568933 | 0.028331455 |
| ENSG00000182404 | RP1-86D1.3      | 1.226063754 | 0.005372515 | ENSG00000124343 | XG        | 0.90862861  | 0.00065943  |
| ENSG00000261519 | Y_RNA           | 1.227036045 | 0.002599109 | ENSG00000168610 | STAT3     | 0.908760661 | 2.35E-05    |
| ENSG00000259974 | LINC00261       | 1.22774169  | 0.004981498 | ENSG00000169018 | FEM1B     | 0.908803163 | 0.028110275 |
| ENSG00000273344 | PAXIP1-AS1      | 1.229036846 | 2.29E-08    | ENSG00000169908 | TM4SF1    | 0.908829261 | 0.000358593 |
| ENSG00000198468 | FLVCR1-AS1      | 1.231841222 | 2.04E-06    | ENSG00000120129 | DUSP1     | 0.908891778 | 0.031640115 |
| ENSG00000237436 | RP11-312B8.1    | 1.231848409 | 7.63E-05    | ENSG00000149499 | EML3      | 0.908939744 | 0.022690759 |
| ENSG00000237773 | AC003075.4      | 1.232099741 | 2.76E-05    | ENSG00000023191 | RNH1      | 0.909019421 | 0.001536825 |
| ENSG00000267321 | RP11-1094M14.11 | 1.232611915 | 2.88E-08    | ENSG00000130396 | MLLT4     | 0.909125722 | 0.00170936  |
| ENSG00000260912 | RP11-363E7.4    | 1.233970589 | 0.001030622 | ENSG00000105993 | DNAJB6    | 0.909126463 | 0.011038263 |
| ENSG00000241224 | RP11-59E19.1    | 1.236026028 | 0.018661929 | ENSG00000011454 | RABGAP1   | 0.909156421 | 2.39E-06    |
| ENSG00000260552 | RP11-49I11.1    | 1.238680516 | 0.000275096 | ENSG00000062282 | DGAT2     | 0.909315642 | 0.000841781 |
| ENSG00000242094 | FOXP1-IT1       | 1.239582467 | 3.15E-06    | ENSG00000112039 | FANCE     | 0.909370134 | 0.008747223 |
| ENSG00000235280 | MCF2L-AS1       | 1.247090575 | 4.36E-07    | ENSG00000167565 | SERTAD3   | 0.909384963 | 0.000196755 |
| ENSG00000204261 | TAPSAR1         | 1.247737963 | 7.93E-06    | ENSG00000115840 | SLC25A12  | 0.909529628 | 5.69E-05    |
| ENSG00000234171 | RNASEH1-AS1     | 1.251031234 | 7.32E-11    | ENSG00000085871 | MGST2     | 0.909597781 | 9.02E-08    |
| ENSG00000272755 | RP11-326G21.1   | 1.253346786 | 2.47E-06    | ENSG00000143514 | TP53BP2   | 0.909638217 | 2.61E-05    |
| ENSG00000258768 | CTD-2292M16.8   | 1.254759798 | 5.71E-06    | ENSG00000197782 | ZNF780A   | 0.909666368 | 3.96E-05    |
| ENSG00000228709 | AP001065.15     | 1.26320361  | 0.000957975 | ENSG00000135838 | NPL       | 0.909704289 | 0.001915578 |
| ENSG00000242861 | RP11-285F7.2    | 1.273123372 | 1.51E-11    | ENSG00000048544 | MRPS10    | 0.909774757 | 3.29E-05    |
| ENSG00000177337 | DLGAP1-AS1      | 1.27540904  | 1.06E-09    | ENSG00000150995 | ITPR1     | 0.909820624 | 0.000230646 |
| ENSG00000272606 | RP11-554J4.1    | 1.276030572 | 4.57E-09    | ENSG00000119411 | BSPRY     | 0.909878856 | 0.045029085 |
| ENSG00000273038 | RP11-479G22.8   | 1.281425151 | 3.40E-10    | ENSG00000096060 | FKBP5     | 0.909887606 | 0.001597186 |
| ENSG00000273373 | RP5-1074L1.4    | 1.29826965  | 1.49E-08    | ENSG00000214357 | NEURL1B   | 0.909944827 | 0.001111477 |
| ENSG00000272677 | RP11-127B20.3   | 1.301279091 | 7.14E-07    | ENSG00000171566 | PLRG1     | 0.91001563  | 1.15E-06    |
| ENSG00000225484 | RP11-773D16.1   | 1.305901251 | 2.77E-05    | ENSG00000131475 | VPS25     | 0.910038549 | 7.04E-08    |
| ENSG00000234883 | MIR155HG        | 1.314021781 | 0.000610777 | ENSG00000119723 | COQ6      | 0.910105305 | 0.001952571 |
| ENSG00000270605 | RP5-1092A3.4    | 1.316383582 | 0.000194432 | ENSG00000007237 | GAS7      | 0.91010618  | 0.000387301 |
| ENSG00000273264 | RP11-131L23.2   | 1.328141889 | 1.38E-06    | ENSG00000149115 | TNKS1BP1  | 0.910111436 | 9.31E-06    |
| ENSG00000261690 | AC009133.12     | 1.330673687 | 1.29E-05    | ENSG00000196331 | HIST1H2BO | 0.910197068 | 0.016479847 |
| ENSG00000153363 | LINC00467       | 1.336711705 | 1.34E-08    | ENSG00000132912 | DCTN4     | 0.91021188  | 0.005338368 |
| ENSG00000234771 | RP11-395P17.3   | 1.344753099 | 3.67E-10    | ENSG00000211584 | SLC48A1   | 0.910213526 | 0.000683155 |
| ENSG00000228630 | HOTAIR          | 1.345488008 | 0.000381876 | ENSG00000138801 | PAPSS1    | 0.910218039 | 5.70E-05    |
| ENSG00000110347 | MMP12           | 1.347847225 | 0.009025728 | ENSG00000108669 | CYTH1     | 0.910227608 | 9.07E-09    |
| ENSG00000248092 | NNT-AS1         | 1.358496877 | 4.36E-07    | ENSG00000112531 | QKI       | 0.910231894 | 1.15E-07    |
| ENSG00000272620 | AFAP1-AS1       | 1.367776923 | 0.000343148 | ENSG00000198478 | SH3BGRL2  | 0.910246664 | 2.90E-05    |
| ENSG00000259976 | RP11-553L6.5    | 1.370914082 | 2.00E-10    | ENSG00000164904 | ALDH7A1   | 0.910297492 | 0.001574057 |
| ENSG00000254154 | RP4-798P15.3    | 1.380607781 | 1.18E-11    | ENSG00000188227 | ZNF793    | 0.910341944 | 0.000155071 |
| ENSG00000227388 | RP11-112J3.16   | 1.396327583 | 2.16E-08    | ENSG00000052344 | PRSS8     | 0.91034832  | 0.005460034 |
| ENSG00000244306 | CTD-2314B22.3   | 1.428186192 | 0.000179368 | ENSG00000137509 | PRCP      | 0.910353626 | 2.09E-06    |
| ENSG00000234753 | RP11-328M4.2    | 1.446771922 | 2.91E-07    | ENSG00000172840 | PDP2      | 0.910419418 | 0.010176341 |
| ENSG00000254560 | RP11-1L12.3     | 1.478392761 | 2.26E-10    | ENSG00000075790 | BCAP29    | 0.910524093 | 5.49E-06    |

|                 |              |             |          |                 |              |             |             |
|-----------------|--------------|-------------|----------|-----------------|--------------|-------------|-------------|
| ENSG00000167117 | LINC00483    | 1.515259858 | 7.65E-06 | ENSG00000133835 | HSD17B4      | 0.91059488  | 8.14E-09    |
| ENSG00000260196 | RP1-239B22.5 | 1.554195977 | 2.73E-10 | ENSG00000187189 | TSPYL4       | 0.910610054 | 0.039393144 |
| ENSG00000266010 | GATA6-AS1    | 1.6030194   | 1.63E-05 | ENSG00000178734 | C13orf45     | 0.910631673 | 0.000188009 |
| ENSG00000272510 | RP4-680D5.8  | 1.621535627 | 2.74E-06 | ENSG00000170445 | HARS         | 0.910666047 | 4.32E-08    |
| ENSG00000248771 | RP11-294O2.2 | 2.190092456 | 2.43E-08 | ENSG00000102962 | CCL22        | 0.910672751 | 5.69E-05    |
|                 |              |             |          | ENSG00000120256 | LRP11        | 0.910728761 | 9.92E-06    |
|                 |              |             |          | ENSG00000083223 | ZCCHC6       | 0.910773082 | 2.70E-08    |
|                 |              |             |          | ENSG00000085063 | CD59         | 0.910778657 | 0.008064734 |
|                 |              |             |          | ENSG00000060688 | SNRNP40      | 0.910825181 | 4.96E-05    |
|                 |              |             |          | ENSG00000176358 | TAC4         | 0.910910045 | 0.00019128  |
|                 |              |             |          | ENSG00000140740 | UQCRC2       | 0.910996781 | 2.52E-07    |
|                 |              |             |          | ENSG00000164654 | MIOS         | 0.91102182  | 5.95E-07    |
|                 |              |             |          | ENSG00000112062 | MAPK14       | 0.911047    | 0.000318614 |
|                 |              |             |          | ENSG00000115295 | CLIP4        | 0.911048983 | 0.001208304 |
|                 |              |             |          | ENSG00000168306 | ACOX2        | 0.911121583 | 0.014612326 |
|                 |              |             |          | ENSG00000177981 | ASB8         | 0.911217762 | 9.36E-07    |
|                 |              |             |          | ENSG00000141258 | SGSM2        | 0.911331566 | 4.91E-07    |
|                 |              |             |          | ENSG00000121064 | SCPEP1       | 0.911456221 | 0.005380015 |
|                 |              |             |          | ENSG00000131584 | ACAP3        | 0.911530128 | 2.49E-07    |
|                 |              |             |          | ENSG00000181830 | SLC35C1      | 0.911541527 | 0.009583795 |
|                 |              |             |          | ENSG00000115216 | NRBP1        | 0.911573459 | 0.003118659 |
|                 |              |             |          | ENSG00000150787 | PTS          | 0.911627845 | 2.58E-06    |
|                 |              |             |          | ENSG00000105402 | NAPA         | 0.911649761 | 0.001208951 |
|                 |              |             |          | ENSG00000145335 | SNCA         | 0.911664744 | 2.35E-09    |
|                 |              |             |          | ENSG00000268358 | EPB41L4A-AS2 | 0.911688812 | 0.038590669 |
|                 |              |             |          | ENSG00000177042 | TMEM80       | 0.911760845 | 0.009527937 |
|                 |              |             |          | ENSG00000163386 | NBPF10       | 0.911798505 | 1.29E-06    |
|                 |              |             |          | ENSG00000183955 | SETD8        | 0.911801566 | 0.049120884 |
|                 |              |             |          | ENSG00000162366 | PDZK1IP1     | 0.911819403 | 0.018492409 |
|                 |              |             |          | ENSG00000065154 | OAT          | 0.911843548 | 0.037916675 |
|                 |              |             |          | ENSG00000100997 | ABHD12       | 0.911965172 | 2.59E-06    |
|                 |              |             |          | ENSG00000171314 | PGAM1        | 0.912010079 | 0.000277893 |
|                 |              |             |          | ENSG00000156599 | ZDHHC5       | 0.912049193 | 1.20E-10    |
|                 |              |             |          | ENSG00000117281 | CD160        | 0.912075639 | 0.000709837 |
|                 |              |             |          | ENSG00000213639 | PPP1CB       | 0.912093743 | 5.23E-06    |
|                 |              |             |          | ENSG00000120925 | RNF170       | 0.91220139  | 6.61E-07    |
|                 |              |             |          | ENSG00000165006 | UBAP1        | 0.912252208 | 0.000266312 |
|                 |              |             |          | ENSG00000115183 | TANC1        | 0.91231087  | 1.38E-07    |
|                 |              |             |          | ENSG00000126945 | HNRNPH2      | 0.912347047 | 6.01E-05    |
|                 |              |             |          | ENSG00000133393 | FOPNL        | 0.912357683 | 1.99E-06    |
|                 |              |             |          | ENSG00000137767 | SQRDL        | 0.912358646 | 0.005447218 |
|                 |              |             |          | ENSG00000163788 | SNRK         | 0.912385893 | 4.36E-07    |
|                 |              |             |          | ENSG00000100304 | TTLL12       | 0.912489864 | 0.028777475 |
|                 |              |             |          | ENSG00000127720 | METTL25      | 0.912535597 | 0.000803799 |
|                 |              |             |          | ENSG00000168522 | FNTA         | 0.912540288 | 6.22E-06    |
|                 |              |             |          | ENSG00000179094 | PER1         | 0.912549784 | 2.82E-07    |
|                 |              |             |          | ENSG00000108828 | VAT1         | 0.912560533 | 0.003802775 |

|                 |               |             |             |
|-----------------|---------------|-------------|-------------|
| ENSG00000136695 | IL36RN        | 0.912622216 | 0.033332997 |
| ENSG00000198624 | CCDC69        | 0.912635132 | 0.012049323 |
| ENSG00000112078 | KCTD20        | 0.912751682 | 0.000396473 |
| ENSG00000163319 | MRPS18C       | 0.9127582   | 1.62E-07    |
| ENSG00000067248 | DHX29         | 0.912819904 | 3.72E-10    |
| ENSG00000105492 | SIGLEC6       | 0.912865096 | 0.001946699 |
| ENSG00000068383 | INPP5A        | 0.912871468 | 1.33E-08    |
| ENSG00000264278 | RP11-162A12.2 | 0.912885971 | 2.37E-06    |
| ENSG00000120278 | PLEKHG1       | 0.912906666 | 0.001812059 |
| ENSG00000007384 | RHBDF1        | 0.912910571 | 3.92E-07    |
| ENSG00000131435 | PDLIM4        | 0.912974938 | 0.004102209 |
| ENSG00000171763 | SPATA5L1      | 0.912984082 | 0.009371573 |
| ENSG00000119514 | GALNT12       | 0.913002728 | 4.26E-06    |
| ENSG00000101843 | PSMD10        | 0.913100936 | 3.47E-05    |
| ENSG00000080561 | MID2          | 0.913136174 | 0.000179212 |
| ENSG00000116750 | UCHL5         | 0.913148806 | 0.000211515 |
| ENSG00000011114 | BTBD7         | 0.913171729 | 1.69E-09    |
| ENSG00000123179 | EBPL          | 0.913329401 | 5.21E-05    |
| ENSG00000226742 | HSBP1L1       | 0.913352068 | 0.000137554 |
| ENSG00000144802 | NFKBIZ        | 0.913439559 | 0.000162128 |
| ENSG00000167081 | PBX3          | 0.913457651 | 0.001033654 |
| ENSG00000176732 | PFN4          | 0.9135584   | 0.009334533 |
| ENSG00000168575 | SLC20A2       | 0.913586637 | 0.024072684 |
| ENSG00000049245 | VAMP3         | 0.913589161 | 0.004571308 |
| ENSG00000183044 | ABAT          | 0.913694643 | 0.009170205 |
| ENSG00000101210 | EEF1A2        | 0.913735754 | 7.72E-05    |
| ENSG00000186815 | TPCN1         | 0.913742782 | 7.07E-09    |
| ENSG00000162924 | REL           | 0.913841002 | 0.00027255  |
| ENSG00000187990 | HIST1H2BG     | 0.91384268  | 0.02624145  |
| ENSG00000154556 | SORBS2        | 0.913892664 | 0.004205514 |
| ENSG00000130165 | ELOF1         | 0.913910842 | 2.22E-05    |
| ENSG00000142623 | PADI1         | 0.913922483 | 0.002323312 |
| ENSG00000189169 | KRTAP10-12    | 0.913923198 | 4.72E-08    |
| ENSG00000189120 | SP6           | 0.913927293 | 3.32E-06    |
| ENSG00000167815 | PRDX2         | 0.91397987  | 0.000615965 |
| ENSG00000111725 | PRKAB1        | 0.914033859 | 0.000192422 |
| ENSG00000129187 | DCTD          | 0.914034782 | 3.23E-05    |
| ENSG00000088035 | ALG6          | 0.914054001 | 0.000358211 |
| ENSG00000124215 | CDH26         | 0.91411828  | 4.40E-06    |
| ENSG00000137075 | RNF38         | 0.914298433 | 3.10E-05    |
| ENSG00000169895 | SYAP1         | 0.914302115 | 4.29E-06    |
| ENSG00000129595 | EPB41L4A      | 0.914347711 | 0.006110293 |
| ENSG00000100462 | PRMT5         | 0.914377631 | 0.004262046 |
| ENSG00000126432 | PRDX5         | 0.914389927 | 7.03E-07    |
| ENSG00000198046 | ZNF667        | 0.914392242 | 0.000121513 |
| ENSG00000204947 | ZNF425        | 0.914407846 | 1.02E-07    |
| ENSG00000109220 | CHIC2         | 0.914458383 | 0.020049366 |

|                 |           |             |             |
|-----------------|-----------|-------------|-------------|
| ENSG00000135423 | GLS2      | 0.914488705 | 0.01180396  |
| ENSG00000163659 | TIPARP    | 0.914507983 | 9.48E-06    |
| ENSG00000008382 | MPND      | 0.914513173 | 1.23E-05    |
| ENSG00000186591 | UBE2H     | 0.914518078 | 0.000352029 |
| ENSG00000104549 | SQLE      | 0.91453876  | 0.009475853 |
| ENSG00000089127 | OAS1      | 0.914540839 | 0.002256969 |
| ENSG00000145390 | USP53     | 0.914549594 | 9.30E-05    |
| ENSG00000182580 | EPHB3     | 0.914586479 | 0.049630969 |
| ENSG00000082153 | BZW1      | 0.91462271  | 3.63E-09    |
| ENSG00000053770 | AP5M1     | 0.914627609 | 7.26E-07    |
| ENSG00000089094 | KDM2B     | 0.914634514 | 8.38E-05    |
| ENSG00000102024 | PLS3      | 0.91464442  | 0.039736969 |
| ENSG00000175895 | PLEKHF2   | 0.914746349 | 0.001310499 |
| ENSG00000152256 | PDK1      | 0.914854821 | 0.001623938 |
| ENSG00000213516 | RBMXL1    | 0.91492808  | 0.000879409 |
| ENSG00000126947 | ARMCX1    | 0.914985201 | 0.047722821 |
| ENSG00000105875 | WDR91     | 0.915005007 | 0.000470123 |
| ENSG00000113441 | LNPEP     | 0.915012934 | 1.28E-08    |
| ENSG00000104129 | DNAJC17   | 0.915024648 | 0.00036158  |
| ENSG00000139990 | DCAF5     | 0.915037257 | 2.20E-09    |
| ENSG00000099860 | GADD45B   | 0.915071149 | 0.000398755 |
| ENSG00000204381 | LAYN      | 0.9151333   | 0.01907218  |
| ENSG00000113391 | FAM172A   | 0.915352649 | 8.58E-06    |
| ENSG00000184708 | EIF4ENIF1 | 0.915353042 | 0.011266302 |
| ENSG00000140400 | MAN2C1    | 0.915363086 | 3.63E-06    |
| ENSG00000101144 | BMP7      | 0.915409235 | 0.002547495 |
| ENSG00000130150 | MOSPD2    | 0.91544647  | 3.22E-05    |
| ENSG00000115286 | NDUFS7    | 0.915582091 | 0.000962366 |
| ENSG00000176136 | MC5R      | 0.915596979 | 6.63E-05    |
| ENSG00000172243 | CLEC7A    | 0.915716359 | 8.28E-09    |
| ENSG00000152591 | DSPP      | 0.915854214 | 0.003997045 |
| ENSG00000135823 | STX6      | 0.915954829 | 5.21E-06    |
| ENSG00000086544 | ITPKC     | 0.915959512 | 0.014108106 |
| ENSG00000198721 | ECI2      | 0.915990388 | 0.00270921  |
| ENSG00000130227 | XPO7      | 0.91604377  | 2.87E-07    |
| ENSG00000112406 | HECA      | 0.916117863 | 1.60E-05    |
| ENSG00000156282 | CLDN17    | 0.916179546 | 0.023027209 |
| ENSG00000155252 | PI4K2A    | 0.916193156 | 0.00190299  |
| ENSG00000033178 | UBA6      | 0.916226167 | 3.05E-06    |
| ENSG00000140465 | CYP1A1    | 0.916253125 | 0.002284437 |
| ENSG00000112339 | HBS1L     | 0.916260195 | 1.19E-05    |
| ENSG00000120647 | CCDC77    | 0.916405924 | 0.002361001 |
| ENSG00000166747 | AP1G1     | 0.916483647 | 4.45E-07    |
| ENSG00000086200 | IPO11     | 0.916517655 | 1.79E-08    |
| ENSG00000108946 | PRKAR1A   | 0.916590789 | 1.54E-06    |
| ENSG00000176749 | CDK5R1    | 0.916630089 | 0.001710953 |
| ENSG00000108509 | CAMTA2    | 0.91667918  | 0.000392062 |

|                 |           |             |             |
|-----------------|-----------|-------------|-------------|
| ENSG00000197324 | LRP10     | 0.916697504 | 0.002637756 |
| ENSG00000124787 | RPP40     | 0.9167046   | 0.000220274 |
| ENSG00000075945 | KIFAP3    | 0.91671357  | 0.006410381 |
| ENSG00000113810 | SMC4      | 0.916788915 | 0.037426698 |
| ENSG00000164066 | INTU      | 0.916816463 | 0.033232681 |
| ENSG00000135363 | LMO2      | 0.91683295  | 0.030466768 |
| ENSG00000095066 | HOOK2     | 0.916941395 | 0.000145107 |
| ENSG00000161610 | HCRT      | 0.916945    | 0.014969215 |
| ENSG00000172354 | GNB2      | 0.916977862 | 8.24E-05    |
| ENSG00000100300 | TSPO      | 0.917044262 | 0.043718799 |
| ENSG00000124151 | NCOA3     | 0.917050399 | 8.95E-06    |
| ENSG00000169247 | SH3TC2    | 0.917074548 | 0.004086976 |
| ENSG00000105679 | GAPDHS    | 0.917316437 | 0.015494373 |
| ENSG00000122304 | PRM2      | 0.917423564 | 0.009358377 |
| ENSG00000066027 | PPP2R5A   | 0.917446198 | 0.000293474 |
| ENSG00000040633 | PHF23     | 0.917458    | 1.51E-07    |
| ENSG00000213123 | TCTEX1D2  | 0.917483669 | 0.003655424 |
| ENSG00000006451 | RALA      | 0.917536419 | 4.64E-07    |
| ENSG00000120217 | CD274     | 0.917615661 | 0.01332975  |
| ENSG00000197852 | FAM212B   | 0.917673798 | 1.39E-11    |
| ENSG00000187091 | PLCD1     | 0.917751803 | 0.001010488 |
| ENSG00000099875 | MKMK2     | 0.917760734 | 0.000736236 |
| ENSG00000114270 | COL7A1    | 0.917761699 | 0.002854237 |
| ENSG00000189091 | SF3B3     | 0.917810932 | 0.024970495 |
| ENSG00000118855 | MFS1      | 0.917844871 | 0.039285517 |
| ENSG00000156886 | ITGAD     | 0.917860272 | 4.03E-09    |
| ENSG00000170967 | DDI1      | 0.917942437 | 3.82E-07    |
| ENSG00000164306 | PRIMPOL   | 0.917946812 | 0.000336403 |
| ENSG00000206075 | SERPINB5  | 0.918015242 | 5.06E-09    |
| ENSG00000099960 | SLC7A4    | 0.918040011 | 0.005760709 |
| ENSG00000198858 | R3HDM4    | 0.918141846 | 5.60E-07    |
| ENSG00000165782 | TMEM55B   | 0.918155937 | 1.82E-05    |
| ENSG00000125534 | PPDPF     | 0.918160073 | 0.012993778 |
| ENSG00000055208 | TAB2      | 0.918195768 | 0.040347986 |
| ENSG00000138768 | USO1      | 0.918207633 | 2.61E-07    |
| ENSG00000205464 | ATP6AP1L  | 0.918225099 | 0.003266944 |
| ENSG00000110911 | SLC11A2   | 0.918250011 | 3.33E-06    |
| ENSG00000156675 | RAB11FIP1 | 0.918257722 | 5.90E-06    |
| ENSG00000130005 | GAMT      | 0.918280807 | 0.019362449 |
| ENSG00000197321 | SVIL      | 0.918288828 | 4.80E-08    |
| ENSG00000119900 | OGFRL1    | 0.918296024 | 0.010975199 |
| ENSG00000119048 | UBE2B     | 0.918307589 | 2.60E-08    |
| ENSG00000173548 | SNX33     | 0.918321882 | 1.37E-07    |
| ENSG00000130560 | UBAC1     | 0.918444851 | 1.40E-06    |
| ENSG00000100938 | GMPR2     | 0.918452382 | 0.000287939 |
| ENSG00000169139 | UBE2V2    | 0.918466688 | 0.000148481 |
| ENSG00000170634 | ACYP2     | 0.918555933 | 0.00955764  |

|                 |            |             |             |
|-----------------|------------|-------------|-------------|
| ENSG00000109171 | SLAIN2     | 0.91861734  | 2.17E-09    |
| ENSG00000177673 | C2orf57    | 0.918638286 | 2.16E-06    |
| ENSG00000197753 | LHFPL5     | 0.918652319 | 2.67E-06    |
| ENSG00000132507 | EIF5A      | 0.918866801 | 1.70E-06    |
| ENSG00000122042 | UBL3       | 0.918866868 | 0.041622719 |
| ENSG00000167323 | STIM1      | 0.91888023  | 0.0042975   |
| ENSG00000025708 | TYMP       | 0.918888053 | 0.046289025 |
| ENSG00000125968 | ID1        | 0.918936762 | 0.035075415 |
| ENSG00000065615 | CYB5R4     | 0.918941934 | 0.003885208 |
| ENSG00000106993 | CDC37L1    | 0.918971438 | 0.000203982 |
| ENSG00000168497 | SDPR       | 0.919011894 | 0.045527288 |
| ENSG00000103404 | USP31      | 0.919066516 | 0.00015442  |
| ENSG00000196782 | MAML3      | 0.919137807 | 7.37E-07    |
| ENSG00000124496 | TRERF1     | 0.919155094 | 6.32E-06    |
| ENSG00000188868 | ZNF563     | 0.919208096 | 0.00054693  |
| ENSG00000072134 | EPN2       | 0.91926388  | 4.78E-05    |
| ENSG00000166579 | NDEL1      | 0.919264004 | 0.017712743 |
| ENSG00000169764 | UGP2       | 0.919264474 | 3.92E-07    |
| ENSG00000156253 | RWDD2B     | 0.919271871 | 0.000180312 |
| ENSG00000149182 | ARFGAP2    | 0.91930681  | 2.01E-05    |
| ENSG00000258227 | CLEC5A     | 0.919323587 | 0.014809673 |
| ENSG00000119979 | FAM45A     | 0.919340743 | 0.000358282 |
| ENSG00000151692 | RNF144A    | 0.919375634 | 0.002654598 |
| ENSG00000198093 | ZNF649     | 0.919414317 | 1.18E-05    |
| ENSG00000101850 | GPR143     | 0.919479834 | 0.006569329 |
| ENSG00000111727 | HCFC2      | 0.919504521 | 0.040308832 |
| ENSG00000130559 | CAMSAP1    | 0.919547485 | 0.000315675 |
| ENSG00000215271 | HOMEZ      | 0.919550368 | 1.23E-05    |
| ENSG00000174903 | RAB1B      | 0.919624115 | 0.001207007 |
| ENSG00000198039 | ZNF273     | 0.919634883 | 0.023173864 |
| ENSG00000159648 | TEPP       | 0.919639395 | 0.000191602 |
| ENSG00000137266 | SLC22A23   | 0.919660067 | 7.51E-09    |
| ENSG00000077498 | TYR        | 0.919698192 | 7.89E-09    |
| ENSG00000087250 | MT3        | 0.919736581 | 0.001795225 |
| ENSG00000117362 | APH1A      | 0.919803637 | 4.78E-08    |
| ENSG00000173599 | PC         | 0.919857097 | 0.008061614 |
| ENSG00000184148 | SPRR4      | 0.919888307 | 9.08E-06    |
| ENSG00000121579 | NAA50      | 0.919916977 | 6.95E-06    |
| ENSG00000168938 | PPIC       | 0.919960929 | 4.26E-07    |
| ENSG00000072803 | FBXW11     | 0.920068722 | 0.000376347 |
| ENSG00000268242 | AC131935.1 | 0.920071781 | 0.001691333 |
| ENSG00000117758 | STX12      | 0.920119993 | 2.68E-12    |
| ENSG00000182890 | GLUD2      | 0.920249322 | 1.43E-08    |
| ENSG00000163344 | PMVK       | 0.920295625 | 0.003451502 |
| ENSG00000122490 | PQLC1      | 0.920313071 | 0.005785841 |
| ENSG00000163930 | BAP1       | 0.92032088  | 1.79E-06    |
| ENSG00000100075 | SLC25A1    | 0.920343916 | 0.000185669 |

|                 |            |             |             |
|-----------------|------------|-------------|-------------|
| ENSG00000103769 | RAB11A     | 0.920358404 | 0.009920085 |
| ENSG00000122696 | SLC25A51   | 0.920410632 | 0.028899525 |
| ENSG00000204315 | FKBPL      | 0.920426225 | 2.02E-05    |
| ENSG00000111729 | CLEC4A     | 0.920493506 | 0.013881749 |
| ENSG00000183807 | FAM162B    | 0.920609115 | 0.005099675 |
| ENSG00000134779 | TPGS2      | 0.920617756 | 0.001645195 |
| ENSG00000197429 | IPP        | 0.92062665  | 0.0001156   |
| ENSG00000111144 | LTA4H      | 0.920650624 | 0.001828252 |
| ENSG00000225996 | AL356356.1 | 0.920667563 | 0.020801092 |
| ENSG00000186300 | ZNF555     | 0.920675135 | 0.001537725 |
| ENSG00000233822 | HIST1H2BN  | 0.920698789 | 0.000275948 |
| ENSG00000128872 | TMOD2      | 0.920720262 | 0.000290803 |
| ENSG00000165494 | PCF11      | 0.920720365 | 0.002898012 |
| ENSG00000140830 | TXNL4B     | 0.920731355 | 0.000204965 |
| ENSG00000112096 | SOD2       | 0.920759216 | 0.00324469  |
| ENSG00000168398 | BDKRB2     | 0.920796071 | 0.023234812 |
| ENSG00000065135 | GNAI3      | 0.920833715 | 0.03507688  |
| ENSG00000093167 | LRRFIP2    | 0.920833846 | 0.008178368 |
| ENSG00000128310 | GALR3      | 0.920833991 | 0.005230941 |
| ENSG00000140443 | IGF1R      | 0.920870372 | 0.021919731 |
| ENSG00000215252 | GOLGA8B    | 0.920904466 | 0.031481075 |
| ENSG00000154721 | JAM2       | 0.920915263 | 0.030039303 |
| ENSG00000119314 | PTBP3      | 0.921006562 | 4.55E-06    |
| ENSG00000171827 | ZNF570     | 0.921016296 | 0.000746605 |
| ENSG00000048707 | VPS13D     | 0.92101758  | 0.000545157 |
| ENSG00000212127 | TAS2R14    | 0.921063167 | 0.000449445 |
| ENSG00000136710 | CCDC115    | 0.921070028 | 9.90E-05    |
| ENSG00000198408 | MGEA5      | 0.921100646 | 0.000111427 |
| ENSG00000137822 | TUBGCP4    | 0.921272214 | 0.000474567 |
| ENSG00000203727 | SAMD5      | 0.921286416 | 0.044860295 |
| ENSG00000164169 | PRMT10     | 0.921288822 | 0.000209691 |
| ENSG00000136153 | LMO7       | 0.921296577 | 0.0011374   |
| ENSG00000138756 | BMP2K      | 0.921366444 | 0.003847823 |
| ENSG00000116141 | MARK1      | 0.921367398 | 0.003286881 |
| ENSG00000119787 | ATL2       | 0.921383602 | 0.001422228 |
| ENSG00000091073 | DTX2       | 0.921453196 | 0.000369216 |
| ENSG00000224051 | GLTPD1     | 0.921510162 | 0.006596418 |
| ENSG00000145949 | MYLK4      | 0.921510838 | 0.001682211 |
| ENSG00000133104 | SPG20      | 0.921515423 | 0.003521317 |
| ENSG00000255112 | CHMP1B     | 0.92157938  | 1.42E-05    |
| ENSG00000105135 | ILVBL      | 0.921585334 | 4.97E-05    |
| ENSG00000070031 | SCT        | 0.921626204 | 0.000959391 |
| ENSG00000212864 | RNF208     | 0.921639101 | 5.52E-05    |
| ENSG00000176124 | DLEU1      | 0.921654309 | 0.002244222 |
| ENSG00000165591 | FAAH2      | 0.921766013 | 0.004320239 |
| ENSG00000140153 | WDR20      | 0.921767091 | 5.19E-06    |
| ENSG00000083290 | ULK2       | 0.921779643 | 0.000214902 |

|                 |          |             |             |
|-----------------|----------|-------------|-------------|
| ENSG00000159335 | PTMS     | 0.92179538  | 0.003789322 |
| ENSG00000044115 | CTNNA1   | 0.921844493 | 1.30E-07    |
| ENSG00000169220 | RGS14    | 0.921859245 | 0.002995639 |
| ENSG00000100330 | MTMR3    | 0.921885208 | 0.001526499 |
| ENSG00000157551 | KCNJ15   | 0.92201962  | 0.042306031 |
| ENSG00000112494 | UNC93A   | 0.922047228 | 0.049439733 |
| ENSG00000103671 | TRIP4    | 0.922099078 | 7.99E-10    |
| ENSG00000127152 | BCL11B   | 0.922143459 | 0.000189213 |
| ENSG00000166265 | CYYR1    | 0.922169747 | 0.015133242 |
| ENSG00000119812 | FAM98A   | 0.922192629 | 6.05E-05    |
| ENSG00000148229 | POLE3    | 0.922282681 | 0.000411841 |
| ENSG00000118194 | TNNT2    | 0.922300059 | 1.12E-06    |
| ENSG00000182541 | LIMK2    | 0.922367929 | 0.02662675  |
| ENSG00000153721 | CNKSR3   | 0.922457939 | 1.81E-05    |
| ENSG00000129521 | EGLN3    | 0.922464476 | 0.038700704 |
| ENSG00000152670 | DDX4     | 0.922465641 | 0.014639953 |
| ENSG00000178234 | GALNT11  | 0.922470869 | 1.35E-05    |
| ENSG00000118518 | RNF146   | 0.922512898 | 0.004747887 |
| ENSG00000174917 | C19orf70 | 0.922530351 | 3.76E-05    |
| ENSG00000040341 | STAU2    | 0.92254221  | 0.033050002 |
| ENSG00000160216 | AGPAT3   | 0.922544505 | 0.005774113 |
| ENSG00000153339 | TRAPPC8  | 0.922552885 | 8.42E-05    |
| ENSG00000184602 | SNN      | 0.922581458 | 0.003266392 |
| ENSG00000062096 | ARSF     | 0.922606293 | 0.004085227 |
| ENSG00000243137 | PSG4     | 0.922622975 | 1.06E-06    |
| ENSG00000157483 | MYO1E    | 0.922683593 | 0.000681853 |
| ENSG00000159289 | GOLGA6A  | 0.922697339 | 0.006629045 |
| ENSG00000164329 | PAPD4    | 0.922714777 | 3.13E-06    |
| ENSG00000102547 | CAB39L   | 0.922749287 | 0.000260983 |
| ENSG00000177879 | AP3S1    | 0.922780081 | 3.01E-09    |
| ENSG00000186073 | C15orf41 | 0.922788302 | 5.93E-05    |
| ENSG00000179134 | SAMD4B   | 0.922792324 | 0.002782047 |
| ENSG00000162777 | DENND2D  | 0.92283989  | 1.15E-05    |
| ENSG00000068024 | HDAC4    | 0.92285914  | 0.006892014 |
| ENSG00000136044 | APPL2    | 0.922886394 | 0.004270968 |
| ENSG00000099992 | TBC1D10A | 0.922892487 | 2.93E-07    |
| ENSG00000134046 | MBD2     | 0.922900702 | 0.00246218  |
| ENSG00000067057 | PFKP     | 0.92290655  | 1.67E-06    |
| ENSG00000095713 | CRTAC1   | 0.922929001 | 3.18E-05    |
| ENSG00000133661 | SFTPD    | 0.922950725 | 0.002219379 |
| ENSG00000132677 | RHBG     | 0.922972129 | 0.033670421 |
| ENSG00000168830 | HTR1E    | 0.922987122 | 0.001806331 |
| ENSG00000203782 | LOR      | 0.923017681 | 0.005465574 |
| ENSG00000125952 | MAX      | 0.923019578 | 0.000147605 |
| ENSG00000103653 | CSK      | 0.923035146 | 1.28E-06    |
| ENSG00000108947 | EFNB3    | 0.923037243 | 8.88E-08    |
| ENSG00000167740 | CYB5D2   | 0.923039849 | 0.001794964 |

|                 |           |             |             |
|-----------------|-----------|-------------|-------------|
| ENSG00000172380 | GNG12     | 0.92304594  | 3.72E-05    |
| ENSG00000102362 | SYTL4     | 0.923065219 | 2.09E-06    |
| ENSG00000225190 | PLEKHM1   | 0.923078059 | 0.014310874 |
| ENSG00000023892 | DEF6      | 0.923096818 | 6.98E-07    |
| ENSG00000164172 | MOCS2     | 0.923109024 | 3.56E-05    |
| ENSG00000137693 | YAP1      | 0.92313096  | 0.012374333 |
| ENSG00000154845 | PPP4R1    | 0.923206905 | 0.016132896 |
| ENSG00000047644 | WWC3      | 0.923230089 | 0.002142125 |
| ENSG00000134909 | ARHGAP32  | 0.923249903 | 0.045483824 |
| ENSG00000079393 | DUSP13    | 0.923339204 | 6.82E-06    |
| ENSG00000087008 | ACOX3     | 0.923345701 | 0.003352349 |
| ENSG00000110427 | KIAA1549L | 0.923549223 | 1.51E-07    |
| ENSG00000163636 | PSMD6     | 0.923565894 | 0.003260671 |
| ENSG00000135932 | CAB39     | 0.923567639 | 7.07E-08    |
| ENSG00000064393 | HIPK2     | 0.923626029 | 6.69E-05    |
| ENSG00000109787 | KLF3      | 0.923678497 | 1.17E-06    |
| ENSG00000166452 | AKIP1     | 0.923740513 | 9.31E-06    |
| ENSG00000100078 | PLA2G3    | 0.923837291 | 0.027378605 |
| ENSG00000196867 | ZFP28     | 0.923888388 | 1.07E-08    |
| ENSG00000185009 | AP3M1     | 0.924045979 | 1.03E-05    |
| ENSG00000142700 | DMRTA2    | 0.924079032 | 0.004090334 |
| ENSG00000143420 | ENSA      | 0.924083686 | 9.16E-05    |
| ENSG00000108479 | GALK1     | 0.924094228 | 0.048142258 |
| ENSG00000145715 | RASA1     | 0.924100076 | 0.001538605 |
| ENSG00000117625 | RCOR3     | 0.924103255 | 0.011744972 |
| ENSG00000102471 | NDFIP2    | 0.924127947 | 0.000442427 |
| ENSG00000188522 | FAM83G    | 0.924188744 | 9.15E-06    |
| ENSG00000163705 | FANCD2OS  | 0.924210442 | 0.000205393 |
| ENSG00000057608 | GDI2      | 0.92425884  | 4.99E-07    |
| ENSG00000157500 | APPL1     | 0.924398184 | 6.60E-06    |
| ENSG00000104763 | ASAHI     | 0.924439175 | 7.22E-05    |
| ENSG00000181449 | SOX2      | 0.924459724 | 0.001284187 |
| ENSG00000113119 | TMCO6     | 0.924475782 | 0.000106463 |
| ENSG00000102302 | FGD1      | 0.924530354 | 0.001724276 |
| ENSG00000116954 | RRAGC     | 0.92454399  | 9.16E-07    |
| ENSG00000178445 | GLDC      | 0.92457043  | 0.007153121 |
| ENSG00000116035 | VAX2      | 0.924590749 | 0.003703284 |
| ENSG00000153561 | RMND5A    | 0.924601242 | 0.010450484 |
| ENSG00000175356 | SCUBE2    | 0.924612602 | 0.002259651 |
| ENSG00000198911 | SREBF2    | 0.924632891 | 0.005816419 |
| ENSG00000182552 | RWDD4     | 0.924673177 | 0.000250997 |
| ENSG00000063438 | AHRR      | 0.92467731  | 0.032306943 |
| ENSG00000213416 | KRTAP4-12 | 0.924736992 | 0.004339493 |
| ENSG00000100280 | AP1B1     | 0.92487833  | 2.08E-06    |
| ENSG00000182631 | RXFP3     | 0.924890007 | 0.000420724 |
| ENSG00000161326 | DUSP14    | 0.924922039 | 0.018831374 |
| ENSG00000197846 | HIST1H2BF | 0.924940944 | 0.019008633 |

|                 |            |             |             |
|-----------------|------------|-------------|-------------|
| ENSG00000116717 | GADD45A    | 0.924972662 | 0.000426491 |
| ENSG00000100744 | GSKIP      | 0.92500993  | 4.10E-05    |
| ENSG00000140950 | TLDC1      | 0.925017265 | 0.016936053 |
| ENSG00000107372 | ZFAND5     | 0.925072347 | 0.02491178  |
| ENSG00000152223 | EPG5       | 0.925110979 | 1.46E-07    |
| ENSG00000154639 | CXADR      | 0.925130068 | 0.015033962 |
| ENSG00000102893 | PHKB       | 0.925141581 | 0.000182933 |
| ENSG00000173611 | SCAI       | 0.92519983  | 0.002282027 |
| ENSG00000088888 | MAVS       | 0.925200783 | 0.019434589 |
| ENSG00000186318 | BACE1      | 0.925218106 | 2.39E-06    |
| ENSG00000075239 | ACAT1      | 0.925297421 | 4.05E-05    |
| ENSG00000084754 | HADHA      | 0.925306273 | 3.38E-07    |
| ENSG00000072609 | CHFR       | 0.925338095 | 0.012218163 |
| ENSG00000179029 | TMEM107    | 0.925416711 | 4.08E-05    |
| ENSG00000099194 | SCD        | 0.92548966  | 0.049334516 |
| ENSG00000139722 | VPS37B     | 0.925490553 | 0.000153717 |
| ENSG00000164548 | TRA2A      | 0.925505805 | 4.43E-05    |
| ENSG00000166454 | ATMIN      | 0.925530501 | 0.031566108 |
| ENSG00000155903 | RASA2      | 0.925545799 | 3.84E-05    |
| ENSG00000160408 | ST6GALNAC6 | 0.925564592 | 1.38E-06    |
| ENSG00000157045 | NTAN1      | 0.925571855 | 3.76E-06    |
| ENSG00000163110 | PDLIM5     | 0.92559395  | 0.01793215  |
| ENSG00000197619 | ZNF615     | 0.925597365 | 0.003518132 |
| ENSG00000174307 | PHLDA3     | 0.925684849 | 0.020643412 |
| ENSG00000245848 | CEBPA      | 0.92573195  | 0.027343971 |
| ENSG00000164024 | METAP1     | 0.925736178 | 0.015884648 |
| ENSG00000047056 | WDR37      | 0.925737003 | 1.20E-05    |
| ENSG00000170248 | PDCD6IP    | 0.925737294 | 7.65E-07    |
| ENSG00000126500 | FLRT1      | 0.92576522  | 0.036309899 |
| ENSG00000090238 | YPEL3      | 0.925784437 | 0.000416785 |
| ENSG00000148218 | ALAD       | 0.925813381 | 0.00109835  |
| ENSG00000083307 | GRHL2      | 0.925821829 | 0.000194279 |
| ENSG00000107036 | KIAA1432   | 0.925825141 | 1.64E-05    |
| ENSG00000188352 | FOCAD      | 0.925881743 | 0.004214985 |
| ENSG00000196517 | SLC6A9     | 0.925909508 | 0.01287501  |
| ENSG00000095015 | MAP3K1     | 0.925925051 | 0.012111769 |
| ENSG00000079999 | KEAP1      | 0.925972791 | 1.05E-06    |
| ENSG00000006459 | KDM7A      | 0.926057047 | 0.000671041 |
| ENSG00000131966 | ACTR10     | 0.926074187 | 1.04E-05    |
| ENSG00000114738 | MAPKAPK3   | 0.92607896  | 0.019514372 |
| ENSG00000186106 | ANKRD46    | 0.926091429 | 0.005057375 |
| ENSG00000204228 | HSD17B8    | 0.926093494 | 0.015637976 |
| ENSG00000012660 | ELOVL5     | 0.926144792 | 0.035139519 |
| ENSG00000204513 | PRAMEF11   | 0.926146386 | 0.00435778  |
| ENSG00000100519 | PSMC6      | 0.926163357 | 0.000434756 |
| ENSG00000033800 | PIAS1      | 0.926178696 | 1.09E-05    |
| ENSG00000169223 | LMAN2      | 0.926213745 | 5.15E-05    |

|                 |          |             |             |
|-----------------|----------|-------------|-------------|
| ENSG00000187583 | PLEKHN1  | 0.926214819 | 2.77E-05    |
| ENSG00000147364 | FBXO25   | 0.926270705 | 0.001462228 |
| ENSG00000127585 | FBXL16   | 0.926313576 | 3.39E-06    |
| ENSG00000168785 | TSPAN5   | 0.926315037 | 0.004397524 |
| ENSG00000103544 | C16orf62 | 0.926337057 | 0.015570329 |
| ENSG00000164219 | PGGT1B   | 0.926339179 | 3.87E-05    |
| ENSG00000144908 | ALDH1L1  | 0.926492635 | 0.040440993 |
| ENSG00000171606 | ZNF274   | 0.926502733 | 0.047334615 |
| ENSG00000100288 | CHKB     | 0.926557959 | 9.57E-05    |
| ENSG00000149452 | SLC22A8  | 0.92672522  | 3.30E-05    |
| ENSG00000120727 | PAIP2    | 0.926755026 | 0.000126462 |
| ENSG00000103266 | STUB1    | 0.926759394 | 2.37E-07    |
| ENSG00000104765 | BNIP3L   | 0.926807512 | 0.037552489 |
| ENSG00000066583 | ISOC1    | 0.926834338 | 1.28E-07    |
| ENSG00000164093 | PITX2    | 0.926845781 | 0.039126448 |
| ENSG00000112290 | WASF1    | 0.926848184 | 0.035795424 |
| ENSG00000087301 | TXNDC16  | 0.926864037 | 0.026391812 |
| ENSG00000066777 | ARFGEF1  | 0.926875133 | 0.001344682 |
| ENSG00000165637 | VDAC2    | 0.926979262 | 0.000821314 |
| ENSG00000187866 | FAM122A  | 0.926979544 | 0.000191259 |
| ENSG00000130449 | ZSWIM6   | 0.927035994 | 5.03E-05    |
| ENSG00000184743 | ATL3     | 0.92703746  | 2.50E-05    |
| ENSG00000213096 | ZNF254   | 0.927042913 | 0.009916669 |
| ENSG00000082805 | ERC1     | 0.927071483 | 3.92E-07    |
| ENSG00000149527 | PLCH2    | 0.927074083 | 0.009687319 |
| ENSG00000241322 | CDRT1    | 0.92707481  | 5.43E-07    |
| ENSG00000058668 | ATP2B4   | 0.927079797 | 0.000245591 |
| ENSG00000116871 | MAP7D1   | 0.927093998 | 9.49E-05    |
| ENSG00000063180 | CA11     | 0.927138997 | 6.78E-05    |
| ENSG00000227268 | KLLN     | 0.927157237 | 0.00047629  |
| ENSG00000079739 | PGM1     | 0.927179498 | 0.023506006 |
| ENSG00000165804 | ZNF219   | 0.927288239 | 0.004852144 |
| ENSG00000180447 | GAS1     | 0.927321238 | 7.76E-07    |
| ENSG00000243772 | KIR2DL3  | 0.927364652 | 2.80E-05    |
| ENSG00000130711 | PRDM12   | 0.927364833 | 0.004417622 |
| ENSG00000100448 | CTSG     | 0.927379076 | 0.000326705 |
| ENSG00000251655 | PRB1     | 0.9274113   | 0.010178762 |
| ENSG00000175793 | SFN      | 0.927418952 | 1.16E-07    |
| ENSG00000149654 | CDH22    | 0.927424828 | 3.82E-09    |
| ENSG00000166233 | ARIH1    | 0.927446694 | 1.67E-05    |
| ENSG00000160753 | RUSC1    | 0.927524124 | 3.61E-06    |
| ENSG00000084207 | GSTP1    | 0.927533427 | 0.039047573 |
| ENSG00000197935 | ZNF311   | 0.927582337 | 0.000284244 |
| ENSG00000140995 | DEF8     | 0.927585752 | 0.012752411 |
| ENSG00000131788 | PIAS3    | 0.927635485 | 0.01269182  |
| ENSG00000105146 | AURKC    | 0.927664972 | 1.43E-05    |
| ENSG00000108175 | ZMIZ1    | 0.927667995 | 0.016647691 |

|                 |         |             |             |
|-----------------|---------|-------------|-------------|
| ENSG00000165197 | FIGF    | 0.927745036 | 0.018309233 |
| ENSG00000117592 | PRDX6   | 0.927780875 | 0.001027447 |
| ENSG00000112685 | EXOC2   | 0.927820553 | 3.28E-05    |
| ENSG00000162927 | PUS10   | 0.927862897 | 0.000726079 |
| ENSG00000115808 | STRN    | 0.927910966 | 0.020614699 |
| ENSG00000075413 | MARK3   | 0.92794572  | 1.90E-06    |
| ENSG00000050327 | ARHGEF5 | 0.927978532 | 6.76E-05    |
| ENSG00000167614 | TTYH1   | 0.927994006 | 0.010490006 |
| ENSG00000131732 | ZCCHC9  | 0.928032246 | 8.72E-05    |
| ENSG00000094841 | UPRT    | 0.928040801 | 0.000224556 |
| ENSG00000167508 | MVD     | 0.928145452 | 2.81E-06    |
| ENSG00000141959 | PFKL    | 0.928166701 | 1.65E-05    |
| ENSG00000176871 | WSB2    | 0.928198355 | 0.028938459 |
| ENSG00000188064 | WNT7B   | 0.928208763 | 0.008890316 |
| ENSG00000172456 | FGGY    | 0.928244326 | 0.004453119 |
| ENSG00000204941 | PSG5    | 0.928277418 | 0.000139068 |
| ENSG00000136286 | MYO1G   | 0.928281625 | 2.25E-05    |
| ENSG00000164010 | ERMAP   | 0.928284478 | 0.002382575 |
| ENSG00000162032 | SPSB3   | 0.928309147 | 0.028002432 |
| ENSG00000182175 | RGMA    | 0.928337813 | 4.13E-09    |
| ENSG00000188672 | RHCE    | 0.928339807 | 0.001024996 |
| ENSG00000145388 | METTL14 | 0.92834318  | 0.001075389 |
| ENSG00000121310 | ECHDC2  | 0.928370305 | 0.004074683 |
| ENSG00000171847 | FAM90A1 | 0.928403069 | 0.006083344 |
| ENSG00000161911 | TREML1  | 0.92841464  | 4.88E-05    |
| ENSG00000141510 | TP53    | 0.928423327 | 0.015249727 |
| ENSG00000107771 | CCSER2  | 0.928454144 | 3.12E-05    |
| ENSG00000198597 | ZNF536  | 0.92845962  | 0.001255156 |
| ENSG00000091542 | ALKBH5  | 0.928487059 | 0.001162174 |
| ENSG00000114648 | KLHL18  | 0.928503342 | 1.16E-06    |
| ENSG00000150347 | ARID5B  | 0.928515633 | 5.41E-09    |
| ENSG00000205765 | C5orf51 | 0.928520255 | 3.16E-07    |
| ENSG00000176018 | LYSMD3  | 0.928529952 | 1.37E-05    |
| ENSG00000182010 | RTKN2   | 0.928558861 | 0.040034555 |
| ENSG00000091622 | PITPNM3 | 0.928563495 | 0.020925543 |
| ENSG00000135655 | USP15   | 0.928576411 | 8.69E-05    |
| ENSG00000197024 | ZNF398  | 0.928635998 | 0.003103081 |
| ENSG00000206418 | RAB12   | 0.928712436 | 0.001839244 |
| ENSG00000011295 | TTC19   | 0.928727535 | 5.44E-05    |
| ENSG00000163191 | S100A11 | 0.928759531 | 0.00761067  |
| ENSG00000173281 | PPP1R3B | 0.928786277 | 5.59E-05    |
| ENSG00000204839 | MROH6   | 0.928797322 | 3.16E-05    |
| ENSG00000070371 | CLTCL1  | 0.928798099 | 0.000168482 |
| ENSG00000166199 | ALKBH3  | 0.928804619 | 0.024128856 |
| ENSG00000166856 | GPR182  | 0.92880836  | 5.54E-07    |
| ENSG00000197233 | OR1J2   | 0.928817462 | 2.82E-07    |
| ENSG00000070759 | TESK2   | 0.928831583 | 0.001348524 |

|                 |           |             |             |
|-----------------|-----------|-------------|-------------|
| ENSG00000170175 | CHRN1     | 0.92885281  | 0.003936022 |
| ENSG00000130844 | ZNF331    | 0.928856433 | 0.023314763 |
| ENSG00000185689 | C6orf201  | 0.928872121 | 0.000151526 |
| ENSG00000109572 | CLCN3     | 0.928916819 | 0.000201019 |
| ENSG00000172006 | ZNF554    | 0.928955487 | 0.000153264 |
| ENSG00000186364 | NUDT17    | 0.929003347 | 0.000104894 |
| ENSG00000125249 | RAP2A     | 0.929043025 | 1.99E-05    |
| ENSG00000142046 | TMEM91    | 0.929173362 | 6.73E-06    |
| ENSG00000147533 | GOLGA7    | 0.929193498 | 4.44E-06    |
| ENSG00000013503 | POLR3B    | 0.929352955 | 0.034739064 |
| ENSG00000185340 | GAS2L1    | 0.929380298 | 0.007136585 |
| ENSG00000177646 | ACAD9     | 0.929395826 | 3.36E-06    |
| ENSG00000169155 | ZBTB43    | 0.929404675 | 1.49E-05    |
| ENSG00000109686 | SH3D19    | 0.929405166 | 0.002448753 |
| ENSG00000138069 | RAB1A     | 0.929419232 | 1.08E-05    |
| ENSG00000018869 | ZNF582    | 0.929437621 | 4.96E-08    |
| ENSG00000100418 | DESI1     | 0.929459561 | 0.011815447 |
| ENSG00000166546 | BEAN1     | 0.929463472 | 0.005312533 |
| ENSG00000133997 | MED6      | 0.929485714 | 0.022606708 |
| ENSG00000167881 | SRP68     | 0.929515946 | 4.77E-07    |
| ENSG00000187554 | TLR5      | 0.929577277 | 0.005229436 |
| ENSG00000161243 | FBXO27    | 0.929628937 | 0.000205028 |
| ENSG00000172731 | LRRC20    | 0.929679196 | 0.045366892 |
| ENSG00000072518 | MARK2     | 0.929712099 | 3.26E-05    |
| ENSG00000187144 | SPATA21   | 0.929712854 | 4.07E-06    |
| ENSG00000116205 | TCEANC2   | 0.929737256 | 0.000137067 |
| ENSG00000188997 | KCTD21    | 0.929752872 | 0.023301943 |
| ENSG00000166839 | ANKDD1A   | 0.929802877 | 0.00948511  |
| ENSG00000008441 | NFIX      | 0.929867064 | 0.004318067 |
| ENSG00000101493 | ZNF516    | 0.929953024 | 0.00256678  |
| ENSG00000180573 | HIST1H2AC | 0.929955823 | 0.019660107 |
| ENSG00000188976 | NOC2L     | 0.929957798 | 1.98E-06    |
| ENSG00000196724 | ZNF418    | 0.930016885 | 0.007614983 |
| ENSG00000131724 | IL13RA1   | 0.930029753 | 0.035196501 |
| ENSG00000185869 | ZNF829    | 0.930036591 | 3.11E-06    |
| ENSG00000161542 | PRPSAP1   | 0.930046585 | 0.004178782 |
| ENSG00000185666 | SYN3      | 0.930051132 | 0.010072075 |
| ENSG00000138621 | PPCDC     | 0.930053273 | 0.002234094 |
| ENSG00000050030 | KIAA2022  | 0.93007838  | 5.69E-07    |
| ENSG00000151468 | CCDC3     | 0.930140086 | 0.002837655 |
| ENSG00000082929 | C4orf6    | 0.930156551 | 5.55E-06    |
| ENSG00000166170 | BAG5      | 0.930158445 | 1.35E-05    |
| ENSG00000060138 | YBX3      | 0.930159414 | 0.002461599 |
| ENSG00000183337 | BCOR      | 0.930180945 | 0.01018269  |
| ENSG00000159873 | CCDC117   | 0.930193857 | 9.51E-05    |
| ENSG00000120733 | KDM3B     | 0.930240285 | 1.15E-06    |
| ENSG00000066084 | DIP2B     | 0.93030861  | 3.56E-05    |

|                 |          |             |             |
|-----------------|----------|-------------|-------------|
| ENSG00000069812 | HES2     | 0.93032286  | 0.004809701 |
| ENSG00000075426 | FOSL2    | 0.930324459 | 0.010356873 |
| ENSG00000187475 | HIST1H1T | 0.930363323 | 3.26E-06    |
| ENSG00000184459 | BPIFC    | 0.930380204 | 0.000126595 |
| ENSG00000164332 | UBLCP1   | 0.930405195 | 0.001481017 |
| ENSG00000180739 | S1PR5    | 0.93044272  | 0.039795685 |
| ENSG00000146904 | EPHA1    | 0.93046667  | 0.014908325 |
| ENSG00000111319 | SCNN1A   | 0.930470622 | 0.009046085 |
| ENSG00000080819 | CPOX     | 0.930471288 | 0.00512018  |
| ENSG00000151689 | INPP1    | 0.930494904 | 0.016190825 |
| ENSG00000120437 | ACAT2    | 0.930511683 | 0.047805257 |
| ENSG00000169918 | OTUD7A   | 0.930522829 | 1.15E-06    |
| ENSG00000197766 | CFD      | 0.930551865 | 0.030188581 |
| ENSG00000057757 | PITHD1   | 0.93062273  | 5.18E-10    |
| ENSG00000170873 | MTSS1    | 0.930633285 | 0.000219962 |
| ENSG00000089876 | DHX32    | 0.930636708 | 9.80E-11    |
| ENSG00000116996 | ZP4      | 0.930658799 | 4.12E-07    |
| ENSG00000128573 | FOXP2    | 0.930686136 | 8.48E-10    |
| ENSG00000125734 | GPR108   | 0.930701172 | 2.83E-05    |
| ENSG00000169019 | COMMD8   | 0.930701815 | 0.001769909 |
| ENSG00000166167 | BTRC     | 0.930720058 | 0.000539154 |
| ENSG00000141527 | CARD14   | 0.930725748 | 0.012787545 |
| ENSG00000123080 | CDKN2C   | 0.930729049 | 8.18E-05    |
| ENSG00000213390 | ARHGAP19 | 0.930731715 | 0.001702695 |
| ENSG00000049883 | PTCD2    | 0.930819709 | 7.37E-05    |
| ENSG00000022976 | ZNF839   | 0.93089316  | 8.68E-06    |
| ENSG00000135452 | TSPAN31  | 0.930917615 | 0.00127516  |
| ENSG00000057935 | MTA3     | 0.930979011 | 7.97E-06    |
| ENSG00000109680 | TBC1D19  | 0.930979105 | 0.000358982 |
| ENSG00000147883 | CDKN2B   | 0.930993845 | 0.01913869  |
| ENSG00000091039 | OSBPL8   | 0.931088234 | 0.008264293 |
| ENSG00000108786 | HSD17B1  | 0.931124445 | 0.000150431 |
| ENSG00000145217 | SLC26A1  | 0.931188527 | 0.023028972 |
| ENSG00000198691 | ABCA4    | 0.931214779 | 1.59E-05    |
| ENSG00000076067 | RBMS2    | 0.931226516 | 0.004071801 |
| ENSG00000134910 | STT3A    | 0.931258305 | 0.00400609  |
| ENSG00000005893 | LAMP2    | 0.931315514 | 1.17E-05    |
| ENSG00000100433 | KCNK10   | 0.93132517  | 8.72E-05    |
| ENSG00000166289 | PLEKHF1  | 0.93136792  | 0.00066355  |
| ENSG00000121281 | ADCY7    | 0.931369109 | 6.65E-06    |
| ENSG00000185305 | ARL15    | 0.931392212 | 0.000377927 |
| ENSG00000171681 | ATF7IP   | 0.931401269 | 0.00144844  |
| ENSG00000125746 | EML2     | 0.931408481 | 5.73E-09    |
| ENSG00000204388 | HSPA1B   | 0.931409582 | 0.00714498  |
| ENSG00000164674 | SYTL3    | 0.931459255 | 0.000608312 |
| ENSG00000110108 | TMEM109  | 0.93155658  | 0.008547083 |
| ENSG00000172350 | ABCG4    | 0.931586266 | 4.12E-06    |

|                 |            |             |             |
|-----------------|------------|-------------|-------------|
| ENSG00000172819 | RARG       | 0.931607897 | 0.019750159 |
| ENSG00000158955 | WNT9B      | 0.931637717 | 3.63E-05    |
| ENSG00000152234 | ATP5A1     | 0.931645253 | 0.00453319  |
| ENSG00000118985 | ELL2       | 0.931692053 | 0.00454695  |
| ENSG00000183479 | TREX2      | 0.931714606 | 0.028941961 |
| ENSG00000113272 | THG1L      | 0.931732947 | 0.000713003 |
| ENSG00000076826 | CAMSAP3    | 0.931748981 | 0.003730986 |
| ENSG00000141905 | NFIC       | 0.931754539 | 0.001026758 |
| ENSG00000137727 | ARHGAP20   | 0.931762662 | 1.73E-05    |
| ENSG00000131795 | RBM8A      | 0.93178548  | 1.68E-06    |
| ENSG00000149212 | SESN3      | 0.931810942 | 1.12E-05    |
| ENSG00000137460 | FHDC1      | 0.931818171 | 0.003559618 |
| ENSG00000169738 | DCXR       | 0.931822162 | 0.039725535 |
| ENSG00000099968 | BCL2L13    | 0.931825654 | 3.34E-10    |
| ENSG00000054116 | TRAPPC3    | 0.931846552 | 4.13E-05    |
| ENSG00000179038 | AP001885.1 | 0.931867634 | 7.37E-07    |
| ENSG00000128040 | SPINK2     | 0.931897684 | 0.013314863 |
| ENSG00000169905 | TOR1AIP2   | 0.931970178 | 1.26E-05    |
| ENSG00000232810 | TNF        | 0.931973041 | 0.000219611 |
| ENSG00000189182 | KRT77      | 0.931974153 | 0.002479983 |
| ENSG00000125124 | BBS2       | 0.931979152 | 0.001728847 |
| ENSG00000103067 | ESRP2      | 0.931994817 | 0.000135391 |
| ENSG00000161204 | ABCF3      | 0.932008281 | 6.54E-05    |
| ENSG00000111199 | TRPV4      | 0.932030211 | 0.009967034 |
| ENSG00000135334 | AKIRIN2    | 0.932053695 | 0.010788302 |
| ENSG00000161664 | ASB16      | 0.932074993 | 0.000165091 |
| ENSG00000140600 | SH3GL3     | 0.932122292 | 0.007762016 |
| ENSG00000036257 | CUL3       | 0.93215971  | 9.71E-07    |
| ENSG00000180488 | FAM73A     | 0.93216357  | 0.03630724  |
| ENSG00000064195 | DLX3       | 0.932238257 | 0.000258758 |
| ENSG00000132938 | MTUS2      | 0.93230439  | 7.08E-06    |
| ENSG00000163947 | ARHGEF3    | 0.932319114 | 0.001256454 |
| ENSG00000160808 | MYL3       | 0.932319652 | 0.02077698  |
| ENSG00000164756 | SLC30A8    | 0.932349133 | 3.32E-08    |
| ENSG00000163702 | IL17RC     | 0.932413023 | 0.004364643 |
| ENSG00000170340 | B3GNT2     | 0.932413844 | 0.00012883  |
| ENSG00000221995 | TIAF1      | 0.932520702 | 0.000159055 |
| ENSG00000101187 | SLCO4A1    | 0.932527345 | 0.001731611 |
| ENSG00000111540 | RAB5B      | 0.932533006 | 0.003008863 |
| ENSG00000169372 | CRADD      | 0.932560644 | 0.001652713 |
| ENSG00000006757 | PNPLA4     | 0.932583593 | 0.00811498  |
| ENSG00000119711 | ALDH6A1    | 0.932610854 | 0.00035244  |
| ENSG00000121653 | MAPK8IP1   | 0.932613634 | 0.001140102 |
| ENSG00000132326 | PER2       | 0.932615874 | 0.003591346 |
| ENSG00000112851 | ERBB2IP    | 0.932618972 | 0.009746615 |
| ENSG00000155330 | C16orf87   | 0.932634766 | 0.007378882 |
| ENSG00000140470 | ADAMTS17   | 0.932672401 | 0.002647498 |

|                 |            |             |             |
|-----------------|------------|-------------|-------------|
| ENSG00000197885 | NKIRAS1    | 0.932678994 | 0.006766941 |
| ENSG00000198356 | ASNA1      | 0.932728591 | 0.005923663 |
| ENSG00000198722 | UNC13B     | 0.932759218 | 0.008025028 |
| ENSG00000165819 | METTL3     | 0.932779222 | 0.00166025  |
| ENSG00000145349 | CAMK2D     | 0.932795529 | 4.53E-05    |
| ENSG00000111145 | ELK3       | 0.932834839 | 0.020148103 |
| ENSG00000204695 | OR14J1     | 0.932892303 | 5.79E-06    |
| ENSG00000172531 | PPP1CA     | 0.93291874  | 0.023150628 |
| ENSG00000139194 | RBP5       | 0.933013732 | 0.001176554 |
| ENSG00000174595 | KLF14      | 0.933034733 | 1.57E-06    |
| ENSG00000254999 | BRK1       | 0.933067634 | 6.64E-07    |
| ENSG00000169083 | AR         | 0.933070897 | 0.001022156 |
| ENSG00000101193 | GID8       | 0.933071671 | 0.032718833 |
| ENSG00000135069 | PSAT1      | 0.933077271 | 0.039736651 |
| ENSG00000108528 | SLC25A11   | 0.933090713 | 0.001731221 |
| ENSG00000110955 | ATP5B      | 0.933096205 | 4.79E-06    |
| ENSG00000100865 | CINP       | 0.933137016 | 0.000224133 |
| ENSG00000150776 | C11orf57   | 0.933163605 | 4.86E-06    |
| ENSG00000166140 | ZFYVE19    | 0.933182129 | 0.000318789 |
| ENSG00000134109 | EDEM1      | 0.933213358 | 0.000637381 |
| ENSG00000163106 | HPGDS      | 0.933248046 | 0.002989746 |
| ENSG00000163637 | PRICKLE2   | 0.933284481 | 0.029006505 |
| ENSG00000176720 | BOK        | 0.933298554 | 0.012067851 |
| ENSG00000136802 | LRRC8A     | 0.933310769 | 2.65E-05    |
| ENSG00000076248 | UNG        | 0.933319858 | 0.001177023 |
| ENSG00000071054 | MAP4K4     | 0.933321536 | 0.003916198 |
| ENSG00000163235 | TGFA       | 0.933322933 | 0.04048205  |
| ENSG00000132915 | PDE6A      | 0.933332443 | 4.69E-08    |
| ENSG00000114978 | MOB1A      | 0.93333711  | 5.76E-06    |
| ENSG00000183172 | SMDT1      | 0.933354186 | 1.13E-05    |
| ENSG00000176920 | FUT2       | 0.933366419 | 0.002238068 |
| ENSG00000155876 | RRAGA      | 0.933396481 | 0.009049955 |
| ENSG00000095485 | CWF19L1    | 0.933419687 | 0.000913259 |
| ENSG00000197724 | PHF2       | 0.933444566 | 3.40E-05    |
| ENSG00000054523 | KIF1B      | 0.933465861 | 0.006980335 |
| ENSG00000061676 | NCKAP1     | 0.933478428 | 0.023103024 |
| ENSG00000132423 | COQ3       | 0.933480624 | 0.022909892 |
| ENSG00000175203 | DCTN2      | 0.933497481 | 5.18E-08    |
| ENSG00000146067 | FAM193B    | 0.933535585 | 0.00027383  |
| ENSG00000076321 | KLHL20     | 0.933555663 | 9.31E-11    |
| ENSG00000177932 | ZNF354C    | 0.933556444 | 2.89E-08    |
| ENSG00000077463 | SIRT6      | 0.933636901 | 0.022605331 |
| ENSG00000198589 | LRBA       | 0.93367783  | 4.20E-05    |
| ENSG00000215346 | AF131215.5 | 0.933692313 | 0.027162925 |
| ENSG00000151445 | VIPAS39    | 0.933697164 | 3.37E-07    |
| ENSG00000105048 | TNNT1      | 0.933766404 | 1.06E-06    |
| ENSG00000117450 | PRDX1      | 0.933788583 | 8.78E-07    |

|                 |          |             |             |
|-----------------|----------|-------------|-------------|
| ENSG00000196704 | AMZ2     | 0.933795388 | 0.006181329 |
| ENSG00000030582 | GRN      | 0.933804307 | 0.047965597 |
| ENSG00000125779 | PANK2    | 0.93381092  | 8.32E-07    |
| ENSG00000175582 | RAB6A    | 0.933839067 | 0.024468528 |
| ENSG00000136478 | TEX2     | 0.933859356 | 0.011944321 |
| ENSG00000166090 | IL25     | 0.933869248 | 2.52E-05    |
| ENSG00000204290 | BTNL2    | 0.93387258  | 0.017447672 |
| ENSG00000140471 | LINS     | 0.933905717 | 0.000840387 |
| ENSG00000175137 | SH3BP5L  | 0.933921552 | 8.89E-06    |
| ENSG00000140386 | SCAPER   | 0.933940988 | 0.029591146 |
| ENSG00000183657 | PP13439  | 0.934036133 | 0.01478406  |
| ENSG00000175387 | SMAD2    | 0.934068383 | 0.002693707 |
| ENSG00000079950 | STX7     | 0.934117965 | 5.68E-08    |
| ENSG00000116990 | MYCL     | 0.934119441 | 0.011312988 |
| ENSG00000198851 | CD3E     | 0.934123891 | 0.001957703 |
| ENSG00000187048 | CYP4A11  | 0.934143461 | 0.000213025 |
| ENSG00000132475 | H3F3B    | 0.934166648 | 1.45E-07    |
| ENSG00000179148 | ALOXE3   | 0.934191211 | 0.000118215 |
| ENSG00000065371 | ROPN1    | 0.934272742 | 0.000277132 |
| ENSG00000067225 | PKM      | 0.93434617  | 0.032875821 |
| ENSG00000131233 | GJA9     | 0.934378196 | 0.03287904  |
| ENSG00000129691 | ASH2L    | 0.934379722 | 1.50E-06    |
| ENSG00000170876 | TMEM43   | 0.934380435 | 0.037705311 |
| ENSG00000100647 | KIAA0247 | 0.93439573  | 0.004372001 |
| ENSG00000144118 | RALB     | 0.934410806 | 0.021092687 |
| ENSG00000180104 | EXOC3    | 0.934433081 | 0.000985721 |
| ENSG00000069943 | PIGB     | 0.934454075 | 0.002056634 |
| ENSG00000117000 | RLF      | 0.934489419 | 2.17E-05    |
| ENSG00000188004 | C1orf204 | 0.934535292 | 0.000446026 |
| ENSG00000171223 | JUNB     | 0.93454747  | 0.005210486 |
| ENSG00000101327 | PDYN     | 0.934551745 | 0.021875891 |
| ENSG00000155158 | TTC39B   | 0.934583872 | 0.000537319 |
| ENSG00000130433 | CACNG6   | 0.934590269 | 1.11E-08    |
| ENSG00000115594 | IL1R1    | 0.934646847 | 0.000948476 |
| ENSG00000088682 | COQ9     | 0.934682305 | 0.008171816 |
| ENSG00000086827 | ZW10     | 0.934708728 | 0.004302347 |
| ENSG00000176783 | RUFY1    | 0.934709272 | 2.19E-07    |
| ENSG00000167770 | OTUB1    | 0.934726106 | 1.92E-05    |
| ENSG00000184083 | FAM120C  | 0.934756115 | 3.14E-05    |
| ENSG00000186868 | MAPT     | 0.934766933 | 0.001135071 |
| ENSG00000137561 | TTPA     | 0.934815452 | 0.031036584 |
| ENSG00000151704 | KCNJ1    | 0.934817682 | 1.33E-06    |
| ENSG00000148943 | LIN7C    | 0.934843716 | 1.26E-05    |
| ENSG00000186115 | CYP4F2   | 0.934846324 | 0.045863481 |
| ENSG00000113389 | NPR3     | 0.934871847 | 0.003194238 |
| ENSG00000166135 | HIF1AN   | 0.934897539 | 9.39E-05    |
| ENSG00000101542 | CDH20    | 0.934919952 | 0.01192038  |

|                 |           |             |             |
|-----------------|-----------|-------------|-------------|
| ENSG00000182903 | ZNF721    | 0.934926258 | 0.010144459 |
| ENSG00000112079 | STK38     | 0.934933376 | 1.07E-05    |
| ENSG00000185069 | KRT76     | 0.934961267 | 3.22E-06    |
| ENSG00000198825 | INPP5F    | 0.93497292  | 1.64E-05    |
| ENSG00000105497 | ZNF175    | 0.935020686 | 0.001143325 |
| ENSG00000254550 | OMP       | 0.935044206 | 0.021659682 |
| ENSG00000066926 | FECH      | 0.935054465 | 0.000695472 |
| ENSG00000197893 | NRAP      | 0.935082328 | 2.31E-06    |
| ENSG00000172992 | DCAKD     | 0.935100542 | 0.000671348 |
| ENSG00000101349 | PAK7      | 0.935109359 | 6.40E-06    |
| ENSG00000177370 | TIMM22    | 0.935111609 | 1.07E-05    |
| ENSG00000115598 | IL1RL2    | 0.935112927 | 2.55E-05    |
| ENSG00000250254 | PTTG2     | 0.935134164 | 1.19E-06    |
| ENSG00000168806 | LCMT2     | 0.935155525 | 0.008333534 |
| ENSG00000100697 | DICER1    | 0.935165272 | 2.76E-07    |
| ENSG00000134287 | ARF3      | 0.935172668 | 1.07E-06    |
| ENSG00000110422 | HIPK3     | 0.935205846 | 0.001495363 |
| ENSG00000166224 | SGPL1     | 0.935241194 | 0.021681326 |
| ENSG00000074964 | ARHGEF10L | 0.935271469 | 0.001940584 |
| ENSG00000182612 | TSPAN10   | 0.935286652 | 0.007160439 |
| ENSG00000163312 | HELQ      | 0.935291425 | 0.000602683 |
| ENSG00000139631 | CSAD      | 0.935314427 | 0.033493617 |
| ENSG00000164334 | FAM170A   | 0.935322856 | 1.19E-06    |
| ENSG00000269190 | FBXO17    | 0.935325027 | 0.022361517 |
| ENSG00000149256 | TENM4     | 0.93537507  | 0.006316674 |
| ENSG00000149489 | ROM1      | 0.935382367 | 0.005094808 |
| ENSG00000157911 | PEX10     | 0.935428256 | 0.011709152 |
| ENSG00000204538 | PSORS1C2  | 0.935442266 | 2.50E-05    |
| ENSG00000204370 | SDHD      | 0.935470503 | 0.000101399 |
| ENSG00000171469 | ZNF561    | 0.935503019 | 0.011935973 |
| ENSG00000186803 | IFNA10    | 0.935531613 | 0.004315188 |
| ENSG00000142619 | PADI3     | 0.935570903 | 0.015092081 |
| ENSG00000185823 | NPAP1     | 0.935583054 | 0.036261276 |
| ENSG00000170848 | PSG6      | 0.935720599 | 4.69E-06    |
| ENSG00000163635 | ATXN7     | 0.935759563 | 1.27E-05    |
| ENSG00000125375 | ATP5S     | 0.935859446 | 0.000160901 |
| ENSG00000165152 | TMEM246   | 0.935874546 | 0.01357306  |
| ENSG00000196431 | CRYBA4    | 0.935910439 | 0.005586457 |
| ENSG00000157445 | CACNA2D3  | 0.935928151 | 4.99E-05    |
| ENSG00000135063 | FAM189A2  | 0.935937162 | 0.044424621 |
| ENSG00000259494 | MRPL46    | 0.935937935 | 0.00774835  |
| ENSG00000137080 | IFNA21    | 0.935958994 | 0.001649506 |
| ENSG00000140395 | WDR61     | 0.935962773 | 0.002175918 |
| ENSG00000212721 | KRTAP4-11 | 0.935988239 | 2.95E-05    |
| ENSG00000149305 | HTR3B     | 0.936015259 | 0.009782017 |
| ENSG00000213977 | TAX1BP3   | 0.936023464 | 1.85E-07    |
| ENSG00000081154 | PCNP      | 0.936081219 | 5.86E-06    |

|                 |         |             |             |
|-----------------|---------|-------------|-------------|
| ENSG00000102924 | CBLN1   | 0.936092056 | 0.012788013 |
| ENSG00000109101 | FOXN1   | 0.936113035 | 0.011333209 |
| ENSG00000247626 | MARS2   | 0.936142175 | 0.009294896 |
| ENSG00000100216 | TOMM22  | 0.936160485 | 0.004734498 |
| ENSG00000172987 | HPSE2   | 0.936220029 | 0.004053016 |
| ENSG00000181585 | TMIE    | 0.936241376 | 3.08E-06    |
| ENSG00000154645 | CHODL   | 0.936251414 | 0.000676977 |
| ENSG00000257591 | ZNF625  | 0.936266588 | 0.008526652 |
| ENSG00000104863 | LIN7B   | 0.936277532 | 0.002992131 |
| ENSG00000186395 | KRT10   | 0.936369081 | 0.019477478 |
| ENSG00000135299 | ANKRD6  | 0.936372435 | 0.009279241 |
| ENSG00000177971 | IMP3    | 0.936389268 | 0.003193042 |
| ENSG00000170956 | CEACAM3 | 0.936397834 | 3.08E-06    |
| ENSG00000149218 | ENDOD1  | 0.93640082  | 0.049704772 |
| ENSG00000111142 | METAP2  | 0.936444862 | 0.002871905 |
| ENSG00000075275 | CELSR1  | 0.93646759  | 0.003956139 |
| ENSG00000114331 | ACAP2   | 0.936474357 | 0.00084056  |
| ENSG00000143537 | ADAM15  | 0.936479406 | 0.046785922 |
| ENSG00000100003 | SEC14L2 | 0.93649016  | 0.041743739 |
| ENSG00000159842 | ABR     | 0.93650365  | 0.00675405  |
| ENSG00000185332 | TMEM105 | 0.936508245 | 5.71E-05    |
| ENSG00000183624 | HMCES   | 0.936512603 | 7.34E-08    |
| ENSG00000172817 | CYP7B1  | 0.936525742 | 0.020606473 |
| ENSG00000177105 | RHOG    | 0.936528938 | 0.000764732 |
| ENSG00000198856 | OSTC    | 0.936562505 | 0.001090366 |
| ENSG00000138136 | LBX1    | 0.936571452 | 5.69E-05    |
| ENSG00000129646 | QRICH2  | 0.936642604 | 0.000444552 |
| ENSG00000147526 | TACC1   | 0.936654025 | 0.000971019 |
| ENSG00000166507 | NDST2   | 0.936656778 | 1.34E-09    |
| ENSG00000135617 | PRADC1  | 0.936682702 | 0.001014783 |
| ENSG00000113615 | SEC24A  | 0.936693579 | 0.045454459 |
| ENSG00000093000 | NUP50   | 0.936703699 | 2.39E-06    |
| ENSG00000115112 | TFCP2L1 | 0.936731075 | 0.028404437 |
| ENSG00000133606 | MKRN1   | 0.936796192 | 2.71E-05    |
| ENSG00000177030 | DEAF1   | 0.93684433  | 0.024713452 |
| ENSG00000003249 | DBNDD1  | 0.9368473   | 0.041646564 |
| ENSG00000234465 | PINLYP  | 0.936891455 | 0.024824861 |
| ENSG00000183695 | MRGPRX2 | 0.936911467 | 0.000144832 |
| ENSG00000110906 | KCTD10  | 0.936941181 | 4.01E-07    |
| ENSG00000158109 | TPRG1L  | 0.936958997 | 8.94E-06    |
| ENSG00000148908 | RGS10   | 0.936973112 | 0.016954244 |
| ENSG00000149503 | INCENP  | 0.93697898  | 2.28E-05    |
| ENSG00000141030 | COPS3   | 0.937007289 | 0.01422928  |
| ENSG00000155130 | MARCKS  | 0.937019165 | 0.00247631  |
| ENSG00000147145 | LPAR4   | 0.937035628 | 0.002252988 |
| ENSG00000128654 | MTX2    | 0.937038025 | 0.00539118  |
| ENSG00000177182 | CLVS1   | 0.937044694 | 0.000483802 |

|                 |            |             |             |
|-----------------|------------|-------------|-------------|
| ENSG00000127483 | HP1BP3     | 0.937051626 | 2.84E-05    |
| ENSG00000196475 | GK2        | 0.937056143 | 1.34E-05    |
| ENSG00000120029 | C10orf76   | 0.937070306 | 0.004604629 |
| ENSG00000110077 | MS4A6A     | 0.937072635 | 0.04752927  |
| ENSG00000108405 | P2RX1      | 0.937074412 | 0.000574532 |
| ENSG00000152467 | ZSCAN1     | 0.937092609 | 0.000131102 |
| ENSG00000119906 | FAM178A    | 0.937120905 | 0.011939447 |
| ENSG00000180917 | CMTR2      | 0.937154476 | 0.013677323 |
| ENSG00000167531 | LALBA      | 0.9371607   | 0.007027496 |
| ENSG00000137656 | BUD13      | 0.937194543 | 0.005846401 |
| ENSG00000168291 | PDHB       | 0.937218002 | 0.016982031 |
| ENSG00000108219 | TSPAN14    | 0.937230347 | 0.011708776 |
| ENSG00000236669 | AC006372.1 | 0.937284796 | 8.32E-05    |
| ENSG00000108799 | EZH1       | 0.937307887 | 4.59E-07    |
| ENSG00000168158 | OR2C1      | 0.937312631 | 1.24E-05    |
| ENSG00000167535 | CACNB3     | 0.937313244 | 0.036548835 |
| ENSG00000140259 | MFAP1      | 0.937327539 | 1.80E-05    |
| ENSG00000167772 | ANGPTL4    | 0.937351825 | 0.047085047 |
| ENSG00000110375 | UPK2       | 0.937359093 | 0.008880348 |
| ENSG00000172340 | SUCLG2     | 0.93740326  | 1.01E-08    |
| ENSG00000211796 | TRAV16     | 0.93744686  | 0.023688303 |
| ENSG00000163931 | TKT        | 0.937465931 | 0.002782726 |
| ENSG00000074855 | ANO8       | 0.937469399 | 1.66E-05    |
| ENSG00000170075 | GPR37L1    | 0.937513419 | 0.008421758 |
| ENSG00000163605 | PPP4R2     | 0.937529209 | 0.024488315 |
| ENSG00000104804 | TULP2      | 0.937536444 | 0.003417195 |
| ENSG00000139173 | TMEM117    | 0.937555736 | 0.021010453 |
| ENSG00000122741 | DCAF10     | 0.937559179 | 0.006408201 |
| ENSG00000103184 | SEC14L5    | 0.93757384  | 0.017281142 |
| ENSG00000233224 | HIST1H2AM  | 0.937579854 | 0.012482073 |
| ENSG00000154764 | WNT7A      | 0.93759841  | 0.016242887 |
| ENSG00000168754 | FAM178B    | 0.937630091 | 0.000228453 |
| ENSG00000127743 | IL17B      | 0.937637312 | 0.008799111 |
| ENSG00000197734 | C14orf178  | 0.937645884 | 0.000963537 |
| ENSG00000155846 | PPARGC1B   | 0.937678196 | 0.00118474  |
| ENSG00000114023 | FAM162A    | 0.937701905 | 0.002698024 |
| ENSG00000125445 | MRPS7      | 0.937704051 | 0.000218555 |
| ENSG00000103415 | HMOX2      | 0.937743661 | 0.046580647 |
| ENSG00000165219 | GAPVD1     | 0.937792009 | 0.019182239 |
| ENSG00000108861 | DUSP3      | 0.937807637 | 0.009083339 |
| ENSG00000126247 | CAPNS1     | 0.937816769 | 0.002220256 |
| ENSG00000145214 | DGKQ       | 0.937827306 | 0.007817818 |
| ENSG00000138698 | RAP1GDS1   | 0.937830559 | 0.033047572 |
| ENSG00000122435 | TRMT13     | 0.937867819 | 0.008791715 |
| ENSG00000148154 | UGCG       | 0.937887379 | 0.014509819 |
| ENSG00000148832 | PAOX       | 0.937903429 | 0.019546226 |
| ENSG00000229769 | TRBV10-2   | 0.93791357  | 0.000403544 |

|                 |          |             |             |
|-----------------|----------|-------------|-------------|
| ENSG0000069956  | MAPK6    | 0.937930967 | 0.000313942 |
| ENSG00000136732 | GYPC     | 0.937977622 | 0.004173758 |
| ENSG00000159792 | PSKH1    | 0.937984412 | 0.000423812 |
| ENSG00000151498 | ACAD8    | 0.938008954 | 0.003644167 |
| ENSG00000225485 | ARHGAP23 | 0.938056361 | 1.42E-05    |
| ENSG00000167701 | GPT      | 0.938075043 | 0.022780589 |
| ENSG00000165091 | TMC1     | 0.938148139 | 1.53E-05    |
| ENSG00000125898 | FAM110A  | 0.938156943 | 0.001773125 |
| ENSG00000155393 | HEATR3   | 0.938176224 | 0.014449277 |
| ENSG00000168904 | LRRC28   | 0.938176375 | 1.49E-09    |
| ENSG00000104365 | IKBKB    | 0.938216009 | 0.00021614  |
| ENSG00000137055 | PLAA     | 0.93824608  | 0.003860416 |
| ENSG00000120053 | GOT1     | 0.938249424 | 0.007221524 |
| ENSG00000196586 | MYO6     | 0.938253039 | 0.002455454 |
| ENSG00000125788 | DEFB126  | 0.938272423 | 0.019302031 |
| ENSG00000197548 | ATG7     | 0.938310294 | 9.80E-05    |
| ENSG00000163932 | PRKCD    | 0.938318531 | 0.014843194 |
| ENSG00000204176 | SYT15    | 0.93833228  | 6.48E-07    |
| ENSG00000254585 | MAGEL2   | 0.938337302 | 0.002231803 |
| ENSG00000177599 | ZNF491   | 0.938379181 | 0.000747568 |
| ENSG00000142669 | SH3BGRL3 | 0.938408817 | 0.007054526 |
| ENSG00000128594 | LRRC4    | 0.9384462   | 2.58E-06    |
| ENSG00000167005 | NUDT21   | 0.938477211 | 0.01574691  |
| ENSG00000162928 | PEX13    | 0.938491216 | 0.001910311 |
| ENSG00000080503 | SMARCA2  | 0.938496889 | 0.024947188 |
| ENSG00000142583 | SLC2A5   | 0.938541667 | 4.91E-08    |
| ENSG00000255552 | LY6G6E   | 0.938609489 | 0.000241251 |
| ENSG00000066136 | NFYC     | 0.938624936 | 0.01808358  |
| ENSG00000137713 | PPP2R1B  | 0.938626479 | 7.28E-05    |
| ENSG00000137877 | SPTBN5   | 0.9386816   | 0.014339232 |
| ENSG00000125879 | OTOR     | 0.938716887 | 0.017648894 |
| ENSG00000148730 | EIF4EBP2 | 0.93874664  | 0.000132683 |
| ENSG00000101336 | HCK      | 0.93875357  | 0.034058174 |
| ENSG00000197933 | ZNF823   | 0.938758485 | 0.024230219 |
| ENSG00000116729 | WLS      | 0.938774612 | 0.013544183 |
| ENSG00000123739 | PLA2G12A | 0.938790852 | 0.017569797 |
| ENSG00000213762 | ZNF134   | 0.938803032 | 0.006938596 |
| ENSG00000124789 | NUP153   | 0.938823188 | 0.000121988 |
| ENSG00000165370 | GPR101   | 0.938851237 | 2.13E-06    |
| ENSG00000154359 | LONRF1   | 0.938867122 | 9.91E-10    |
| ENSG00000185313 | SCN10A   | 0.938867652 | 0.000194374 |
| ENSG00000100320 | RBFOX2   | 0.938883313 | 0.027983644 |
| ENSG00000150455 | TIRAP    | 0.938886491 | 3.06E-08    |
| ENSG00000150433 | TMEM218  | 0.938920045 | 0.00019533  |
| ENSG00000066427 | ATXN3    | 0.938947315 | 0.000989649 |
| ENSG00000175220 | ARHGAP1  | 0.938955809 | 0.000156944 |
| ENSG00000153046 | CDYL     | 0.938962803 | 0.00024468  |

|                 |           |             |             |
|-----------------|-----------|-------------|-------------|
| ENSG00000147164 | SNX12     | 0.938984195 | 2.60E-06    |
| ENSG00000074356 | C17orf85  | 0.939021294 | 0.000166398 |
| ENSG00000174527 | MYO1H     | 0.939021312 | 0.018590033 |
| ENSG00000105672 | ETV2      | 0.939035456 | 0.034068472 |
| ENSG00000198909 | MAP3K3    | 0.939087292 | 0.000189334 |
| ENSG00000140553 | UNC45A    | 0.939097091 | 0.016887044 |
| ENSG00000087077 | TRIP6     | 0.939102066 | 0.004068026 |
| ENSG00000198049 | AVPR1B    | 0.939115161 | 0.000314594 |
| ENSG00000078304 | PPP2R5C   | 0.939118391 | 0.000127431 |
| ENSG00000136327 | NKX2-8    | 0.939123657 | 0.007291623 |
| ENSG00000180347 | CCDC129   | 0.93914805  | 4.77E-05    |
| ENSG00000133794 | ARNTL     | 0.939148124 | 0.020916562 |
| ENSG00000187446 | CHP1      | 0.939168381 | 0.036719812 |
| ENSG00000110921 | MVK       | 0.939214147 | 0.007508528 |
| ENSG00000196437 | ZNF569    | 0.939237654 | 0.002821342 |
| ENSG00000142949 | PTPRF     | 0.939308893 | 0.001135399 |
| ENSG00000181856 | SLC2A4    | 0.93936378  | 0.020904953 |
| ENSG00000123374 | CDK2      | 0.939440745 | 2.52E-05    |
| ENSG00000143845 | ETNK2     | 0.939453276 | 0.03051476  |
| ENSG00000130725 | UBE2M     | 0.939481432 | 0.013192164 |
| ENSG00000145982 | FARS2     | 0.939563643 | 0.001000267 |
| ENSG00000134376 | CRB1      | 0.939587965 | 0.035891693 |
| ENSG00000148053 | NTRK2     | 0.939612105 | 0.000291234 |
| ENSG00000106682 | EIF4H     | 0.939636527 | 1.94E-08    |
| ENSG00000064205 | WISP2     | 0.939655537 | 1.31E-06    |
| ENSG00000099942 | CRKL      | 0.939740416 | 0.001394269 |
| ENSG00000141543 | EIF4A3    | 0.939773715 | 6.61E-05    |
| ENSG00000168454 | TXNDC2    | 0.939786417 | 0.000488894 |
| ENSG00000074054 | CLASP1    | 0.939812978 | 9.67E-06    |
| ENSG00000078900 | TP73      | 0.93982072  | 0.010984961 |
| ENSG00000130656 | HBZ       | 0.939822035 | 0.037351454 |
| ENSG00000140497 | SCAMP2    | 0.939845228 | 0.001603061 |
| ENSG00000140575 | IQGAP1    | 0.939847089 | 9.52E-05    |
| ENSG00000211800 | TRAV20    | 0.939863038 | 0.000199743 |
| ENSG00000169344 | UMOD      | 0.939885578 | 0.008776507 |
| ENSG00000022840 | RNF10     | 0.939888256 | 0.003743502 |
| ENSG00000178567 | EPM2AIP1  | 0.939929674 | 0.006237264 |
| ENSG00000059691 | PET112    | 0.939934016 | 0.000584982 |
| ENSG00000159399 | HK2       | 0.939983885 | 0.004724926 |
| ENSG00000166634 | SERPINB12 | 0.939995931 | 2.22E-05    |
| ENSG00000167977 | KCTD5     | 0.940001744 | 1.35E-06    |
| ENSG00000197953 | AADACL2   | 0.940003569 | 0.001502141 |
| ENSG00000165623 | UCMA      | 0.940013249 | 0.00035584  |
| ENSG00000132321 | IQCA1     | 0.940021159 | 2.25E-07    |
| ENSG00000157017 | GHRL      | 0.940021311 | 0.047089304 |
| ENSG00000123636 | BAZ2B     | 0.940029561 | 0.009073614 |
| ENSG00000142632 | ARHGEF19  | 0.9400519   | 0.001651922 |

|                 |              |             |             |
|-----------------|--------------|-------------|-------------|
| ENSG00000104812 | GYS1         | 0.940150414 | 0.004193029 |
| ENSG00000153060 | TEKT5        | 0.940211968 | 0.000538865 |
| ENSG00000221823 | PPP3R1       | 0.940218031 | 0.003649742 |
| ENSG00000018236 | CNTN1        | 0.940223823 | 1.54E-06    |
| ENSG00000131504 | DIAPH1       | 0.940256005 | 5.75E-08    |
| ENSG00000067082 | KLF6         | 0.940261484 | 0.000162953 |
| ENSG00000057019 | DCBLD2       | 0.940279975 | 6.80E-05    |
| ENSG00000230453 | ANKRD18B     | 0.940314434 | 1.69E-05    |
| ENSG00000137802 | MAPKBP1      | 0.940321729 | 0.004405361 |
| ENSG00000237441 | RGL2         | 0.940336398 | 0.003852503 |
| ENSG00000158481 | CD1C         | 0.940373211 | 0.004155055 |
| ENSG00000205302 | SNX2         | 0.94037467  | 0.005088963 |
| ENSG00000100815 | TRIP11       | 0.940379059 | 0.003798728 |
| ENSG00000171408 | PDE7B        | 0.940422616 | 0.029128043 |
| ENSG00000164128 | NPY1R        | 0.940427848 | 0.032503046 |
| ENSG00000127863 | TNFRSF19     | 0.940450779 | 0.0007734   |
| ENSG00000134352 | IL6ST        | 0.94046102  | 0.000797262 |
| ENSG00000167419 | LPO          | 0.940479464 | 0.000338958 |
| ENSG00000197372 | ZNF675       | 0.940523848 | 0.004465225 |
| ENSG00000169548 | ZNF280A      | 0.94053986  | 0.003963034 |
| ENSG00000163812 | ZDHHC3       | 0.940545904 | 0.000410925 |
| ENSG00000101638 | ST8SIA5      | 0.940550569 | 0.005675776 |
| ENSG00000185900 | POMK         | 0.940616777 | 0.001909989 |
| ENSG00000136696 | IL36B        | 0.940646693 | 0.00025209  |
| ENSG00000149480 | MTA2         | 0.940655338 | 0.034045303 |
| ENSG00000117682 | DHDDS        | 0.940669292 | 1.18E-06    |
| ENSG00000123159 | GIPC1        | 0.940722587 | 0.012377947 |
| ENSG00000134940 | ACRV1        | 0.940729825 | 0.026462763 |
| ENSG00000170836 | PPM1D        | 0.940744432 | 0.048555705 |
| ENSG00000108231 | LGI1         | 0.940770093 | 0.032810026 |
| ENSG00000204482 | LST1         | 0.940775546 | 0.000889818 |
| ENSG00000197971 | MBP          | 0.940869903 | 1.55E-07    |
| ENSG00000177992 | SPATA31E1    | 0.940889205 | 0.000555645 |
| ENSG00000134152 | KATNBL1      | 0.940890608 | 0.049428379 |
| ENSG00000103197 | TSC2         | 0.940920237 | 0.022130548 |
| ENSG00000160224 | AIRE         | 0.940931788 | 0.010506723 |
| ENSG00000064989 | CALCRL       | 0.940953812 | 0.003538219 |
| ENSG00000133805 | AMPD3        | 0.940966979 | 0.000108059 |
| ENSG00000211689 | TRGC1        | 0.940968606 | 0.002457506 |
| ENSG00000008083 | JARID2       | 0.940994895 | 0.048502956 |
| ENSG00000162572 | SCNN1D       | 0.941034375 | 0.025840788 |
| ENSG00000172660 | TAF15        | 0.941036077 | 0.003572503 |
| ENSG00000077235 | GTF3C1       | 0.941038521 | 0.01770461  |
| ENSG00000269620 | AL590560.1   | 0.941067657 | 0.001743497 |
| ENSG00000164729 | SLC35G3      | 0.941072065 | 1.15E-05    |
| ENSG00000179021 | C3orf38      | 0.941114967 | 0.009075004 |
| ENSG00000175604 | RP11-276H1.3 | 0.941154308 | 0.00407582  |

|                 |             |             |             |
|-----------------|-------------|-------------|-------------|
| ENSG00000155975 | VPS37A      | 0.941161488 | 0.013445975 |
| ENSG00000187398 | LUZP2       | 0.941220441 | 0.003407945 |
| ENSG00000267710 | AC006116.20 | 0.941242533 | 0.002731627 |
| ENSG00000205531 | NAP1L4      | 0.941262997 | 3.40E-06    |
| ENSG00000166887 | VPS39       | 0.941270985 | 0.000830813 |
| ENSG00000166484 | MAPK7       | 0.941273544 | 0.001415355 |
| ENSG00000179241 | LDLRAD3     | 0.941281968 | 0.035974835 |
| ENSG00000131808 | FSHB        | 0.941286224 | 0.000154768 |
| ENSG00000164023 | SGMS2       | 0.941330686 | 0.021376293 |
| ENSG00000129951 | LPPR3       | 0.94134962  | 0.001457876 |
| ENSG00000121989 | ACVR2A      | 0.941354825 | 0.001204721 |
| ENSG00000161180 | CCDC116     | 0.941408192 | 3.49E-05    |
| ENSG00000134108 | ARL8B       | 0.941413803 | 0.037551088 |
| ENSG00000019995 | ZRANB1      | 0.941477861 | 0.000102517 |
| ENSG00000186446 | ZNF501      | 0.941480769 | 0.000909316 |
| ENSG00000053371 | AKR7A2      | 0.941523551 | 0.026803263 |
| ENSG00000117335 | CD46        | 0.941541213 | 0.000702784 |
| ENSG00000154165 | GPR15       | 0.941558806 | 0.033022176 |
| ENSG00000024422 | EHD2        | 0.941566215 | 0.005257235 |
| ENSG00000170454 | KRT75       | 0.941579047 | 5.33E-05    |
| ENSG00000137078 | SIT1        | 0.941589282 | 0.00578051  |
| ENSG00000170128 | GPR25       | 0.941593842 | 0.031388728 |
| ENSG00000268798 | AC027307.3  | 0.94162748  | 2.11E-05    |
| ENSG00000116147 | TNR         | 0.941654225 | 0.000363136 |
| ENSG00000047249 | ATP6V1H     | 0.941659583 | 0.002948598 |
| ENSG00000160746 | ANO10       | 0.941694866 | 0.009876822 |
| ENSG00000145863 | GABRA6      | 0.941701373 | 0.016338178 |
| ENSG00000166398 | KIAA0355    | 0.941706557 | 7.18E-05    |
| ENSG00000196378 | ZNF34       | 0.94172894  | 0.013740023 |
| ENSG00000038274 | MAT2B       | 0.941773768 | 7.28E-06    |
| ENSG00000066933 | MYO9A       | 0.941777944 | 0.000942109 |
| ENSG00000031698 | SARS        | 0.941795445 | 0.000117161 |
| ENSG00000112130 | RNF8        | 0.94179763  | 9.44E-05    |
| ENSG00000137259 | HIST1H2AB   | 0.941823242 | 0.03209782  |
| ENSG00000211829 | TRDC        | 0.94183923  | 0.035057667 |
| ENSG00000108296 | CWC25       | 0.941847411 | 0.004242036 |
| ENSG00000141642 | ELAC1       | 0.941859753 | 0.042428626 |
| ENSG00000100099 | HPS4        | 0.941865861 | 0.000627221 |
| ENSG00000143107 | FNDC7       | 0.9418866   | 0.017884226 |
| ENSG00000261934 | PCDHGA9     | 0.941913338 | 0.028128447 |
| ENSG00000071051 | NCK2        | 0.941941322 | 0.012837359 |
| ENSG00000151687 | ANKAR       | 0.941971464 | 0.00062911  |
| ENSG00000157184 | CPT2        | 0.941995077 | 0.000138807 |
| ENSG00000183570 | PCBP3       | 0.942008693 | 0.044435428 |
| ENSG00000146378 | TAAR2       | 0.942009566 | 0.037626805 |
| ENSG00000137106 | GRHPR       | 0.94201459  | 0.004493936 |
| ENSG00000125831 | CST11       | 0.942049201 | 8.88E-08    |

|                 |          |             |             |
|-----------------|----------|-------------|-------------|
| ENSG00000092068 | SLC7A8   | 0.942052928 | 0.000522541 |
| ENSG00000144320 | KIAA1715 | 0.942063026 | 0.017658214 |
| ENSG00000134049 | IER3IP1  | 0.942086013 | 0.031987387 |
| ENSG00000171396 | KRTAP4-4 | 0.942122025 | 0.000122418 |
| ENSG00000168589 | DYNLRB2  | 0.942125176 | 0.002196702 |
| ENSG00000100014 | SPECC1L  | 0.942136882 | 0.007005012 |
| ENSG00000240021 | TEX35    | 0.942142732 | 0.001533834 |
| ENSG00000099284 | H2AFY2   | 0.942166083 | 0.000208893 |
| ENSG00000115234 | SNX17    | 0.942179136 | 0.006986707 |
| ENSG00000132518 | GUCY2D   | 0.942187271 | 0.042746099 |
| ENSG00000146049 | KAAG1    | 0.942196976 | 0.006363178 |
| ENSG00000204104 | TRAF3IP1 | 0.942235197 | 0.009676661 |
| ENSG00000214309 | MBLAC1   | 0.942239043 | 0.00016579  |
| ENSG00000076043 | REXO2    | 0.942245588 | 0.035365435 |
| ENSG00000068793 | CYFIP1   | 0.942277673 | 0.009104408 |
| ENSG00000198755 | RPL10A   | 0.9422814   | 0.015182474 |
| ENSG00000132478 | UNK      | 0.94229058  | 3.60E-05    |
| ENSG00000157119 | KLHL40   | 0.942291316 | 0.000747018 |
| ENSG00000132164 | SLC6A11  | 0.942299672 | 0.013014268 |
| ENSG00000147853 | AK3      | 0.942313321 | 1.20E-05    |
| ENSG00000087299 | L2HGDH   | 0.94232096  | 0.000416504 |
| ENSG00000198876 | DCAF12   | 0.94233378  | 2.97E-05    |
| ENSG00000109667 | SLC2A9   | 0.94235564  | 0.034545517 |
| ENSG00000165209 | STRBP    | 0.942364951 | 0.006040323 |
| ENSG00000183684 | ALYREF   | 0.942375795 | 0.007269681 |
| ENSG00000100218 | RTDR1    | 0.942392532 | 0.011518191 |
| ENSG00000153914 | SREK1    | 0.942411569 | 0.000452061 |
| ENSG00000074966 | TXK      | 0.94245016  | 0.028165779 |
| ENSG00000140479 | PCSK6    | 0.94245939  | 1.46E-07    |
| ENSG00000002587 | HS3ST1   | 0.94246861  | 0.007928905 |
| ENSG00000151502 | VPS26B   | 0.94247586  | 8.09E-05    |
| ENSG00000102921 | N4BP1    | 0.942491807 | 0.009966741 |
| ENSG00000182087 | TMEM259  | 0.94250752  | 0.019161303 |
| ENSG00000175189 | INHBC    | 0.942508577 | 0.000125227 |
| ENSG00000130638 | ATXN10   | 0.942509935 | 0.003656726 |
| ENSG00000130226 | DPP6     | 0.942541204 | 0.027802787 |
| ENSG00000074800 | ENO1     | 0.942579693 | 0.006328982 |
| ENSG00000186204 | CYP4F12  | 0.942580274 | 0.024722421 |
| ENSG00000152936 | IFLTD1   | 0.942583443 | 0.001558016 |
| ENSG00000102317 | RBM3     | 0.942600913 | 0.004792842 |
| ENSG00000185264 | TEX33    | 0.942603647 | 0.040759111 |
| ENSG00000154642 | C21orf91 | 0.942605949 | 0.019526665 |
| ENSG00000008196 | TFAP2B   | 0.942627174 | 0.007609942 |
| ENSG00000165269 | AQP7     | 0.942654068 | 0.00029444  |
| ENSG00000122203 | KIAA1191 | 0.942657621 | 1.15E-05    |
| ENSG00000178342 | KCNG2    | 0.942694366 | 0.023923557 |
| ENSG00000184182 | UBE2F    | 0.942774026 | 9.08E-07    |

|                 |            |             |             |
|-----------------|------------|-------------|-------------|
| ENSG00000168490 | PHYHIP     | 0.942793417 | 0.000207033 |
| ENSG00000133935 | C14orf1    | 0.942794388 | 0.026860151 |
| ENSG00000047188 | YTHDC2     | 0.942798626 | 0.00018384  |
| ENSG00000155111 | CDK19      | 0.942943243 | 0.000530699 |
| ENSG00000198736 | MSRB1      | 0.942972919 | 0.006533175 |
| ENSG00000100241 | SBF1       | 0.943017706 | 0.004223532 |
| ENSG00000157764 | BRAF       | 0.943063007 | 0.013781592 |
| ENSG00000183691 | NOG        | 0.943065382 | 0.003654629 |
| ENSG00000198353 | HOXC4      | 0.94306777  | 0.041158837 |
| ENSG00000105426 | PTPRS      | 0.943090689 | 0.010481195 |
| ENSG00000142655 | PEX14      | 0.943100033 | 0.021232044 |
| ENSG00000152700 | SAR1B      | 0.943141922 | 5.21E-05    |
| ENSG00000172936 | MYD88      | 0.943150354 | 3.24E-05    |
| ENSG00000099940 | SNAP29     | 0.943171205 | 0.032242592 |
| ENSG00000138663 | COPS4      | 0.94319828  | 0.003208701 |
| ENSG00000139636 | LMBR1L     | 0.94320347  | 0.000143642 |
| ENSG00000136918 | WDR38      | 0.943272584 | 0.010604037 |
| ENSG00000235863 | B3GALT4    | 0.943276339 | 0.014732224 |
| ENSG00000120992 | LYPLA1     | 0.943296395 | 0.011119971 |
| ENSG00000060971 | ACAA1      | 0.943301131 | 0.010511498 |
| ENSG00000198176 | TFDP1      | 0.943308889 | 0.006365246 |
| ENSG00000151148 | UBE3B      | 0.94331902  | 0.004603979 |
| ENSG00000154723 | ATP5J      | 0.943323993 | 0.017644871 |
| ENSG00000214944 | ARHGEF28   | 0.943324549 | 0.000788403 |
| ENSG00000269700 | AC069547.2 | 0.943328856 | 0.045605966 |
| ENSG00000175662 | TOM1L2     | 0.943332248 | 0.005281203 |
| ENSG00000107902 | LHPP       | 0.943343061 | 0.025503338 |
| ENSG00000245680 | ZNF585B    | 0.943346118 | 0.004866659 |
| ENSG00000186834 | HEXIM1     | 0.943385639 | 0.000751583 |
| ENSG00000139651 | ZNF740     | 0.943392819 | 1.93E-06    |
| ENSG00000103642 | LACTB      | 0.943422424 | 0.002999456 |
| ENSG00000134438 | RAX        | 0.943475859 | 0.008422767 |
| ENSG00000112855 | HARS2      | 0.943485652 | 2.32E-06    |
| ENSG00000189132 | FAM47B     | 0.94349426  | 2.25E-06    |
| ENSG00000007923 | DNAJC11    | 0.94352209  | 0.009502917 |
| ENSG00000131096 | PYY        | 0.943523705 | 0.009423068 |
| ENSG00000167984 | NLRC3      | 0.943535105 | 0.02693827  |
| ENSG00000164050 | PLXNB1     | 0.943543826 | 0.005511757 |
| ENSG00000140505 | CYP1A2     | 0.943582891 | 0.005565295 |
| ENSG00000010322 | NISCH      | 0.943587587 | 0.000211357 |
| ENSG00000132570 | PCBD2      | 0.943595752 | 0.000464329 |
| ENSG00000180219 | FAM71C     | 0.943604487 | 5.55E-05    |
| ENSG00000111300 | NAA25      | 0.943661439 | 0.012931125 |
| ENSG00000163825 | RTP3       | 0.943663126 | 0.000282723 |
| ENSG00000055130 | CUL1       | 0.943680763 | 0.004252195 |
| ENSG00000204701 | OR2J3      | 0.94368457  | 0.032096185 |
| ENSG00000181938 | GINS3      | 0.943694946 | 0.02962844  |

|                 |         |             |             |
|-----------------|---------|-------------|-------------|
| ENSG00000155269 | GPR78   | 0.943701748 | 0.00125466  |
| ENSG00000164363 | SLC6A18 | 0.943705032 | 0.001661899 |
| ENSG00000186468 | RPS23   | 0.943717227 | 7.92E-06    |
| ENSG00000139648 | KRT71   | 0.943721453 | 0.000294019 |
| ENSG00000221888 | OR1C1   | 0.943741235 | 0.000152738 |
| ENSG00000131779 | PEX11B  | 0.943831339 | 3.04E-06    |
| ENSG00000117153 | KLHL12  | 0.943840519 | 0.000200409 |
| ENSG00000163785 | RYK     | 0.943870492 | 0.002323823 |
| ENSG00000129250 | KIF1C   | 0.943887093 | 0.011638261 |
| ENSG00000204420 | C6orf25 | 0.943906763 | 0.020841999 |
| ENSG00000113916 | BCL6    | 0.943914251 | 0.026674243 |
| ENSG00000197444 | OGDHL   | 0.943916445 | 0.02384574  |
| ENSG00000152926 | ZNF117  | 0.943921106 | 0.002901105 |
| ENSG00000151239 | TWF1    | 0.943937434 | 3.57E-05    |
| ENSG00000005302 | MSL3    | 0.943952701 | 1.57E-05    |
| ENSG00000163704 | PRRT3   | 0.943960537 | 0.010529882 |
| ENSG00000100836 | PABPN1  | 0.94397492  | 0.002297536 |
| ENSG00000105514 | RAB3D   | 0.943992899 | 0.008721745 |
| ENSG00000001084 | GCLC    | 0.94405434  | 0.000128605 |
| ENSG00000135605 | TEC     | 0.944060626 | 0.001756974 |
| ENSG00000164347 | GFM2    | 0.944060864 | 0.001191871 |
| ENSG00000111046 | MYF6    | 0.944078835 | 0.002885986 |
| ENSG00000177469 | PTRF    | 0.944207138 | 0.000644295 |
| ENSG00000204160 | ZDHHC18 | 0.944252851 | 5.40E-09    |
| ENSG00000108826 | MRPL27  | 0.944263659 | 0.002482579 |
| ENSG00000166200 | COPS2   | 0.944268843 | 0.000390578 |
| ENSG00000162980 | ARL5A   | 0.944301997 | 0.001831654 |
| ENSG00000221855 | TAS2R41 | 0.944312997 | 4.18E-05    |
| ENSG00000198774 | RASSF9  | 0.944335747 | 0.009306149 |
| ENSG00000173848 | NET1    | 0.944377234 | 0.006127299 |
| ENSG00000122783 | C7orf49 | 0.944391151 | 0.000920342 |
| ENSG00000176393 | RNPEP   | 0.944438621 | 0.003042697 |
| ENSG00000177156 | TALDO1  | 0.944438715 | 0.018867867 |
| ENSG00000152818 | UTRN    | 0.944452396 | 0.002391494 |
| ENSG00000099341 | PSMD8   | 0.944452978 | 0.025468967 |
| ENSG00000130695 | CEP85   | 0.944471231 | 1.65E-05    |
| ENSG00000232258 | TMEM114 | 0.94448876  | 0.008316588 |
| ENSG00000198515 | CNGA1   | 0.944494604 | 0.03601433  |
| ENSG00000140403 | DNAJA4  | 0.944499832 | 0.03699737  |
| ENSG00000142599 | RERE    | 0.944508084 | 0.001807574 |
| ENSG00000130528 | HRC     | 0.944541574 | 0.024602575 |
| ENSG00000149596 | JPH2    | 0.944548629 | 0.005717548 |
| ENSG00000182687 | GALR2   | 0.944554062 | 0.032196653 |
| ENSG00000138767 | CNOT6L  | 0.944575573 | 2.66E-06    |
| ENSG00000185652 | NTF3    | 0.944605643 | 0.012425518 |
| ENSG00000127903 | ZNF835  | 0.944613796 | 0.013497827 |
| ENSG00000104964 | AES     | 0.94463052  | 0.038717712 |

|                 |         |             |             |
|-----------------|---------|-------------|-------------|
| ENSG00000182601 | HS3ST4  | 0.944642347 | 0.000236198 |
| ENSG00000135960 | EDAR    | 0.944648404 | 0.046413199 |
| ENSG00000067445 | TRO     | 0.94465959  | 0.001676092 |
| ENSG00000121446 | RGSL1   | 0.944668299 | 0.018788202 |
| ENSG00000165194 | PCDH19  | 0.944678649 | 0.009958671 |
| ENSG00000114541 | FRMD4B  | 0.94468099  | 0.047153211 |
| ENSG00000078403 | MLLT10  | 0.944716421 | 0.008698137 |
| ENSG00000143353 | LYPLAL1 | 0.944725581 | 0.024316625 |
| ENSG00000184330 | S100A7A | 0.944734814 | 0.01677322  |
| ENSG00000128294 | TPST2   | 0.944760438 | 0.010511369 |
| ENSG00000182674 | KCNB2   | 0.944776125 | 8.46E-06    |
| ENSG00000149575 | SCN2B   | 0.944788703 | 3.78E-06    |
| ENSG00000134007 | ADAM20  | 0.944799476 | 0.000761865 |
| ENSG00000103489 | XYLT1   | 0.944822485 | 0.010479823 |
| ENSG00000146013 | GFRA3   | 0.944853302 | 0.002254115 |
| ENSG00000134765 | DSC1    | 0.944871423 | 0.00195541  |
| ENSG00000049167 | ERCC8   | 0.944872155 | 0.000171508 |
| ENSG00000151893 | CACUL1  | 0.944881625 | 0.000361205 |
| ENSG00000130024 | PHF10   | 0.944905872 | 0.014896448 |
| ENSG00000080511 | RDH8    | 0.944913708 | 0.000296094 |
| ENSG00000099785 | 2-Mar   | 0.944944404 | 0.006771927 |
| ENSG00000110871 | COQ5    | 0.944992586 | 0.001683911 |
| ENSG00000147676 | MAL2    | 0.945033785 | 3.78E-05    |
| ENSG00000075785 | RAB7A   | 0.94505531  | 2.83E-05    |
| ENSG00000119318 | RAD23B  | 0.945070114 | 3.36E-06    |
| ENSG00000133612 | AGAP3   | 0.945071229 | 4.12E-06    |
| ENSG00000118096 | IFT46   | 0.945078325 | 0.000244631 |
| ENSG00000033327 | GAB2    | 0.945087292 | 0.01006463  |
| ENSG00000215568 | GAB4    | 0.945089054 | 0.000696804 |
| ENSG00000198853 | RUSC2   | 0.945102201 | 0.005541994 |
| ENSG00000187097 | ENTPD5  | 0.945102317 | 0.000545825 |
| ENSG00000112335 | SNX3    | 0.945113576 | 0.024312478 |
| ENSG00000111981 | ULBP1   | 0.945119854 | 0.018012456 |
| ENSG00000157617 | C2CD2   | 0.94513621  | 0.004087083 |
| ENSG00000125741 | OPA3    | 0.945137258 | 0.036452651 |
| ENSG00000141404 | GNAL    | 0.945161959 | 0.021296597 |
| ENSG00000168803 | ADAL    | 0.945164834 | 0.000175386 |
| ENSG00000164751 | PEX2    | 0.945171103 | 0.001392782 |
| ENSG00000197016 | ZNF470  | 0.945172601 | 3.69E-05    |
| ENSG00000113648 | H2AFY   | 0.945197364 | 3.75E-07    |
| ENSG00000160994 | CCDC105 | 0.94519893  | 0.000763843 |
| ENSG00000103313 | MEFV    | 0.945199795 | 0.021574831 |
| ENSG00000138684 | IL21    | 0.945214464 | 0.000956284 |
| ENSG00000203950 | FAM127B | 0.94521523  | 0.024775076 |
| ENSG00000197928 | ZNF677  | 0.94521975  | 8.92E-05    |
| ENSG00000174990 | CA5A    | 0.945241215 | 0.034148366 |
| ENSG00000105401 | CDC37   | 0.945255031 | 0.001071545 |

|                 |          |             |             |
|-----------------|----------|-------------|-------------|
| ENSG00000205978 | NYNRIN   | 0.945256595 | 0.006889522 |
| ENSG00000165621 | OXGR1    | 0.945265285 | 0.000267692 |
| ENSG00000172775 | FAM192A  | 0.945273245 | 0.004202791 |
| ENSG00000143252 | SDHC     | 0.945281354 | 0.002993689 |
| ENSG00000065320 | NTN1     | 0.945322904 | 1.51E-06    |
| ENSG00000253368 | TRNP1    | 0.945326818 | 0.023113735 |
| ENSG00000136436 | CALCOCO2 | 0.945352977 | 0.000122055 |
| ENSG00000116667 | C1orf21  | 0.945360022 | 0.045779397 |
| ENSG00000180616 | SSTR2    | 0.9453712   | 0.000194759 |
| ENSG00000034971 | MYOC     | 0.945404524 | 0.000133814 |
| ENSG00000128617 | OPN1SW   | 0.945407961 | 0.037431659 |
| ENSG00000168528 | SERINC2  | 0.945438426 | 0.012287686 |
| ENSG00000169126 | ARMC4    | 0.945464555 | 0.01352881  |
| ENSG00000167074 | TEF      | 0.94549147  | 0.024557325 |
| ENSG00000117400 | MPL      | 0.945510262 | 0.01236832  |
| ENSG00000188878 | FBF1     | 0.945536162 | 8.44E-06    |
| ENSG00000102931 | ARL2BP   | 0.945544575 | 0.00037607  |
| ENSG00000166889 | PATL1    | 0.945621789 | 7.64E-05    |
| ENSG00000100271 | TTLL1    | 0.945630024 | 0.036049946 |
| ENSG00000167165 | UGT1A6   | 0.945637858 | 0.014184927 |
| ENSG00000143590 | EFNA3    | 0.945643142 | 0.009631919 |
| ENSG00000204178 | TMEM57   | 0.945674762 | 0.048480406 |
| ENSG00000109458 | GAB1     | 0.945709497 | 0.00048012  |
| ENSG00000105464 | GRIN2D   | 0.945710827 | 0.032764862 |
| ENSG00000163820 | FYCO1    | 0.94571609  | 3.14E-05    |
| ENSG00000144645 | OSBPL10  | 0.945718782 | 0.004911151 |
| ENSG00000186517 | ARHGAP30 | 0.945722184 | 0.005966885 |
| ENSG00000167106 | FAM102A  | 0.945729357 | 0.000183997 |
| ENSG00000170260 | ZNF212   | 0.945759409 | 0.027232167 |
| ENSG00000119013 | NDUFB3   | 0.945771381 | 0.000684681 |
| ENSG00000150712 | MTMR12   | 0.945776657 | 0.010196849 |
| ENSG00000179104 | TMTC2    | 0.945801311 | 0.039983411 |
| ENSG00000095261 | PSMD5    | 0.945803175 | 0.000345266 |
| ENSG00000135587 | SMPD2    | 0.945818874 | 0.000355781 |
| ENSG00000147416 | ATP6V1B2 | 0.945831807 | 0.028168191 |
| ENSG00000213190 | MLLT11   | 0.945837543 | 4.20E-05    |
| ENSG00000131149 | GSE1     | 0.9458552   | 0.013247673 |
| ENSG00000116353 | MECR     | 0.94585996  | 0.027509178 |
| ENSG00000243811 | APOBEC3D | 0.94586675  | 4.04E-06    |
| ENSG00000132155 | RAF1     | 0.945872701 | 0.002489855 |
| ENSG00000144161 | ZC3H8    | 0.945880728 | 0.008046425 |
| ENSG00000166949 | SMAD3    | 0.945891036 | 0.000124591 |
| ENSG00000149124 | GLYAT    | 0.945893595 | 0.020082618 |
| ENSG00000148925 | BTBD10   | 0.945959981 | 0.001978653 |
| ENSG00000147378 | FATE1    | 0.94596206  | 0.00090845  |
| ENSG00000185055 | EFCAB10  | 0.945971752 | 0.003195165 |
| ENSG00000242019 | KIR3DL3  | 0.946009915 | 0.010769128 |

|                 |           |             |             |
|-----------------|-----------|-------------|-------------|
| ENSG00000112739 | PRPF4B    | 0.946019326 | 0.005576407 |
| ENSG00000108733 | PEX12     | 0.946042342 | 0.014219792 |
| ENSG00000086506 | HBQ1      | 0.946067473 | 0.004773662 |
| ENSG00000112462 | OR12D3    | 0.946067996 | 0.003462189 |
| ENSG00000179476 | C14orf28  | 0.946087775 | 0.033364647 |
| ENSG00000004478 | FKBP4     | 0.946098256 | 0.014446614 |
| ENSG00000168453 | HR        | 0.946119605 | 0.000496169 |
| ENSG00000102753 | KPNA3     | 0.946145003 | 0.005452755 |
| ENSG00000023697 | DERA      | 0.946148329 | 0.007263819 |
| ENSG00000159788 | RGS12     | 0.946162799 | 0.003318305 |
| ENSG00000127952 | STYXL1    | 0.946212834 | 0.001547662 |
| ENSG00000116786 | PLEKHM2   | 0.946219081 | 0.013590434 |
| ENSG00000143748 | NVL       | 0.946223611 | 0.006702727 |
| ENSG00000175575 | PAAF1     | 0.946266538 | 0.006119988 |
| ENSG00000188215 | DCUN1D3   | 0.946321369 | 0.023026432 |
| ENSG00000113048 | MRPS27    | 0.946353251 | 0.036524556 |
| ENSG00000088808 | PPP1R13B  | 0.946368547 | 0.005932216 |
| ENSG00000085832 | EPS15     | 0.946381538 | 3.85E-06    |
| ENSG00000100106 | TRIOBP    | 0.946388299 | 0.003285123 |
| ENSG00000244165 | P2RY11    | 0.946395572 | 0.006607575 |
| ENSG00000109320 | NFKB1     | 0.946423273 | 0.000993727 |
| ENSG00000095321 | CRAT      | 0.946446967 | 0.039071229 |
| ENSG00000144366 | GULP1     | 0.946475569 | 0.004103899 |
| ENSG00000138604 | GLCE      | 0.946481282 | 0.029963972 |
| ENSG00000167193 | CRK       | 0.946488738 | 0.00048627  |
| ENSG00000148985 | PGAP2     | 0.946523231 | 0.044288822 |
| ENSG00000158161 | EYA3      | 0.946538057 | 0.017915375 |
| ENSG00000158796 | DEDD      | 0.946555972 | 0.00133231  |
| ENSG00000186184 | POLR1D    | 0.946560375 | 0.010583423 |
| ENSG00000186326 | RGS9BP    | 0.946560481 | 0.002072676 |
| ENSG00000063601 | MTMR1     | 0.946572132 | 0.033069126 |
| ENSG00000145912 | NHP2      | 0.946574204 | 0.000244047 |
| ENSG00000132671 | SSTR4     | 0.946577338 | 0.013386658 |
| ENSG00000113240 | CLK4      | 0.946578819 | 0.034864093 |
| ENSG00000173578 | XCR1      | 0.946581699 | 2.11E-06    |
| ENSG00000068697 | LAPTM4A   | 0.946602005 | 2.60E-07    |
| ENSG00000132142 | ACACA     | 0.946604495 | 0.00042949  |
| ENSG00000114021 | NIT2      | 0.946606929 | 0.005451459 |
| ENSG00000135902 | CHRND     | 0.94661144  | 7.56E-05    |
| ENSG00000135604 | STX11     | 0.946613619 | 0.008124626 |
| ENSG00000091536 | MYO15A    | 0.946646014 | 0.001091873 |
| ENSG00000152104 | PTPN14    | 0.946650407 | 0.013268342 |
| ENSG00000072041 | SLC6A15   | 0.946677803 | 0.010693426 |
| ENSG00000088854 | C20orf194 | 0.946683026 | 0.032663365 |
| ENSG00000188859 | FAM78B    | 0.946683902 | 0.001009605 |
| ENSG00000155984 | TMEM185A  | 0.946723149 | 0.000167174 |
| ENSG00000156273 | BACH1     | 0.946725472 | 0.024340083 |

|                 |            |             |             |
|-----------------|------------|-------------|-------------|
| ENSG00000187516 | CXorf27    | 0.946759744 | 0.002779795 |
| ENSG00000172940 | SLC22A13   | 0.946768463 | 0.048760902 |
| ENSG00000145331 | TRMT10A    | 0.946776284 | 0.027871317 |
| ENSG00000138376 | BARD1      | 0.946779704 | 0.019493309 |
| ENSG00000157538 | DSCR3      | 0.946828247 | 0.003366672 |
| ENSG00000163623 | NKX6-1     | 0.946836989 | 0.028720256 |
| ENSG00000170162 | VGLL2      | 0.946860433 | 0.000310167 |
| ENSG00000101440 | ASIP       | 0.94692978  | 0.043398766 |
| ENSG00000100023 | PPIL2      | 0.946967185 | 3.93E-06    |
| ENSG00000101811 | CSTF2      | 0.946974484 | 0.01469877  |
| ENSG00000105767 | CADM4      | 0.947008206 | 0.003272438 |
| ENSG00000131398 | KCNC3      | 0.947010663 | 0.01099269  |
| ENSG00000076344 | RGS11      | 0.947010913 | 0.009738326 |
| ENSG00000129968 | ABHD17A    | 0.947022022 | 0.000447612 |
| ENSG00000166529 | ZSCAN21    | 0.9470354   | 0.012999404 |
| ENSG00000136546 | SCN7A      | 0.947049934 | 0.030687858 |
| ENSG00000074695 | LMAN1      | 0.947053997 | 0.001062554 |
| ENSG00000184916 | JAG2       | 0.947086093 | 0.03557172  |
| ENSG00000136026 | CKAP4      | 0.947096417 | 0.000929322 |
| ENSG00000131408 | NR1H2      | 0.947100197 | 0.006824699 |
| ENSG00000128973 | CLN6       | 0.947119359 | 0.002114524 |
| ENSG00000184345 | IQCF2      | 0.947125444 | 0.000979676 |
| ENSG00000268960 | AC091150.1 | 0.947128327 | 0.001977584 |
| ENSG00000205592 | MUC19      | 0.947164521 | 0.020410587 |
| ENSG00000176597 | B3GNT5     | 0.947166438 | 0.006978749 |
| ENSG00000128602 | SMO        | 0.947189661 | 0.008516237 |
| ENSG00000162734 | PEA15      | 0.947190544 | 0.018971171 |
| ENSG00000156256 | USP16      | 0.947194187 | 0.000688042 |
| ENSG00000092203 | TOX4       | 0.947202441 | 0.000122429 |
| ENSG00000160221 | C21orf33   | 0.947202811 | 0.008391126 |
| ENSG00000120664 | SPG20OS    | 0.947236805 | 0.004340271 |
| ENSG00000186684 | CYP27C1    | 0.94725377  | 0.047778921 |
| ENSG00000005238 | FAM214B    | 0.947286664 | 0.01244342  |
| ENSG00000175806 | MSRA       | 0.947311884 | 0.010500319 |
| ENSG00000178307 | TMEM11     | 0.947323196 | 0.011827452 |
| ENSG00000175550 | DRAP1      | 0.947323283 | 0.015069065 |
| ENSG00000163531 | NFASC      | 0.947331591 | 0.000203031 |
| ENSG00000143457 | GOLPH3L    | 0.947337047 | 0.001276196 |
| ENSG00000139874 | SSTR1      | 0.947337605 | 0.04136341  |
| ENSG00000224383 | C17orf72   | 0.947338113 | 0.00256807  |
| ENSG00000121671 | CRY2       | 0.947392656 | 0.009720742 |
| ENSG00000157111 | TMEM171    | 0.947410984 | 0.035192832 |
| ENSG00000140299 | BNIP2      | 0.947437171 | 0.021157262 |
| ENSG00000183324 | C15orf60   | 0.947447021 | 5.45E-05    |
| ENSG00000240771 | ARHGEF25   | 0.947449957 | 0.000370671 |
| ENSG00000241563 | CORT       | 0.9474562   | 0.03403142  |
| ENSG00000011143 | MKS1       | 0.947466342 | 7.47E-05    |

|                 |           |             |             |
|-----------------|-----------|-------------|-------------|
| ENSG00000132825 | PPP1R3D   | 0.947477828 | 0.040017775 |
| ENSG00000077549 | CAPZB     | 0.947478641 | 9.18E-06    |
| ENSG00000171201 | SMR3B     | 0.947487581 | 0.00034902  |
| ENSG00000057593 | F7        | 0.94750363  | 8.70E-05    |
| ENSG00000003137 | CYP26B1   | 0.947504367 | 0.004487186 |
| ENSG00000133149 | TEX13A    | 0.947511716 | 0.016587075 |
| ENSG00000177058 | SLC38A9   | 0.947519706 | 0.008657178 |
| ENSG00000204965 | PCDHA5    | 0.947553965 | 0.041581014 |
| ENSG00000211793 | TRAV9-2   | 0.947605879 | 0.04787078  |
| ENSG00000102904 | TSNAXIP1  | 0.947615815 | 0.02811173  |
| ENSG00000185177 | ZNF479    | 0.947619402 | 4.86E-05    |
| ENSG00000143486 | EIF2D     | 0.947634123 | 0.003197359 |
| ENSG00000105352 | CEACAM4   | 0.947678559 | 5.30E-07    |
| ENSG00000144857 | BOC       | 0.947679112 | 1.23E-05    |
| ENSG00000004142 | POLDIP2   | 0.94767958  | 2.43E-05    |
| ENSG00000123307 | NEUROD4   | 0.947684105 | 0.010901436 |
| ENSG00000142230 | SAE1      | 0.947686058 | 0.008799975 |
| ENSG00000060762 | MPC1      | 0.947686743 | 0.001232122 |
| ENSG00000150779 | TIMM8B    | 0.947793605 | 8.13E-05    |
| ENSG00000198252 | STYX      | 0.947820943 | 0.010429661 |
| ENSG00000131097 | HIGD1B    | 0.947850279 | 0.00629885  |
| ENSG00000172594 | SMPDL3A   | 0.947853569 | 0.042544279 |
| ENSG00000007174 | DNAH9     | 0.947867772 | 0.029580761 |
| ENSG00000224186 | C5orf66   | 0.947870182 | 0.012633534 |
| ENSG00000072506 | HSD17B10  | 0.947871655 | 0.044423375 |
| ENSG00000126337 | KRT36     | 0.947877647 | 0.023263198 |
| ENSG00000266733 | TBC1D29   | 0.947961849 | 0.017034173 |
| ENSG00000139914 | FITM1     | 0.947973605 | 0.000173633 |
| ENSG00000163349 | HIPK1     | 0.947974435 | 3.53E-05    |
| ENSG00000143125 | PROK1     | 0.947993079 | 0.001497059 |
| ENSG00000108591 | DRG2      | 0.947999596 | 9.39E-06    |
| ENSG00000166118 | SPATA19   | 0.94800487  | 0.000763236 |
| ENSG00000205758 | CRYZL1    | 0.948017098 | 0.001073816 |
| ENSG00000115850 | LCT       | 0.948027026 | 0.04201623  |
| ENSG00000171033 | PKIA      | 0.948029603 | 0.010576318 |
| ENSG00000072133 | RPS6KA6   | 0.948051713 | 0.016047804 |
| ENSG00000177551 | NHLH2     | 0.948060007 | 0.00927501  |
| ENSG00000129749 | CHRNA10   | 0.948092937 | 0.000374001 |
| ENSG00000256872 | NOL12     | 0.948112581 | 0.027940428 |
| ENSG00000169393 | ELSPBP1   | 0.94814238  | 0.007848637 |
| ENSG00000180011 | ZADH2     | 0.948146291 | 0.003566998 |
| ENSG00000154832 | CXXC1     | 0.948150114 | 5.25E-05    |
| ENSG00000125533 | BHLHE23   | 0.948152678 | 0.00361185  |
| ENSG00000154035 | C17orf103 | 0.948172841 | 0.001385596 |
| ENSG00000091164 | TXNL1     | 0.948191667 | 0.022412995 |
| ENSG00000048471 | SNX29     | 0.948215984 | 7.79E-05    |
| ENSG00000125107 | CNOT1     | 0.948241067 | 0.00077958  |

|                 |            |             |             |
|-----------------|------------|-------------|-------------|
| ENSG00000080815 | PSEN1      | 0.948251633 | 0.000441554 |
| ENSG00000146587 | RBAK       | 0.948270919 | 0.004181344 |
| ENSG00000168404 | MLKL       | 0.948321867 | 0.002782473 |
| ENSG00000212128 | TAS2R13    | 0.948360824 | 0.006068895 |
| ENSG00000102144 | PGK1       | 0.948375567 | 0.008698798 |
| ENSG00000121892 | PDS5A      | 0.948378232 | 0.000540741 |
| ENSG00000125813 | PAX1       | 0.948417337 | 0.000942076 |
| ENSG00000187889 | C1orf168   | 0.948428649 | 0.01472155  |
| ENSG00000243489 | KRTAP10-11 | 0.948466989 | 0.000552491 |
| ENSG00000198835 | GJC2       | 0.948476374 | 0.009105969 |
| ENSG00000184650 | ODF4       | 0.948480858 | 6.27E-06    |
| ENSG00000185432 | METTL7A    | 0.948483996 | 0.030284589 |
| ENSG00000221910 | OR2F2      | 0.948499772 | 0.00265827  |
| ENSG00000181904 | C5orf24    | 0.948532768 | 2.74E-05    |
| ENSG00000182446 | NPLOC4     | 0.948564662 | 0.00128039  |
| ENSG00000203952 | CCDC160    | 0.948579609 | 0.000719446 |
| ENSG00000117868 | ESYT2      | 0.948582362 | 0.000591788 |
| ENSG00000138107 | ACTR1A     | 0.948641987 | 0.025136277 |
| ENSG00000148408 | CACNA1B    | 0.948659378 | 0.032460121 |
| ENSG00000248099 | INSL3      | 0.948665722 | 0.00025235  |
| ENSG00000183103 | LYPD4      | 0.94867564  | 0.000291003 |
| ENSG00000120705 | ETF1       | 0.94867862  | 0.043594949 |
| ENSG00000118156 | ZNF541     | 0.948678707 | 0.002874488 |
| ENSG00000144840 | RABL3      | 0.948685996 | 0.00117971  |
| ENSG00000101150 | TPD52L2    | 0.948695974 | 0.003613275 |
| ENSG00000078140 | UBE2K      | 0.948700115 | 0.040703789 |
| ENSG00000185651 | UBE2L3     | 0.948717981 | 7.90E-06    |
| ENSG00000185087 | FAM169B    | 0.94871987  | 0.001293701 |
| ENSG00000115919 | KYNU       | 0.948725771 | 0.043144246 |
| ENSG00000137776 | SLTM       | 0.948745363 | 0.000123763 |
| ENSG00000256053 | APOPT1     | 0.948749422 | 0.000361234 |
| ENSG00000240403 | KIR3DL2    | 0.948756445 | 0.001436602 |
| ENSG00000092871 | RFFL       | 0.948757571 | 0.000385151 |
| ENSG00000166595 | FAM96B     | 0.948794402 | 0.021484526 |
| ENSG00000141556 | TBCD       | 0.948801855 | 7.09E-05    |
| ENSG00000104412 | EMC2       | 0.948823325 | 0.004990092 |
| ENSG00000269554 | AL590822.2 | 0.948825736 | 2.91E-08    |
| ENSG00000135926 | TMBIM1     | 0.948832273 | 0.000243835 |
| ENSG00000198453 | ZNF568     | 0.948834446 | 1.41E-09    |
| ENSG00000165283 | STOML2     | 0.948850588 | 0.042587631 |
| ENSG00000170743 | SYT9       | 0.94885317  | 2.45E-05    |
| ENSG00000117507 | FMO6P      | 0.948859488 | 0.027474939 |
| ENSG00000104918 | RETN       | 0.948877389 | 0.042059602 |
| ENSG00000198569 | SLC34A3    | 0.948884082 | 7.13E-06    |
| ENSG00000168090 | COPS6      | 0.948898701 | 0.001291822 |
| ENSG00000163104 | SMARCAD1   | 0.948900501 | 6.51E-05    |
| ENSG00000142507 | PSMB6      | 0.948903399 | 0.001087674 |

|                 |          |             |             |
|-----------------|----------|-------------|-------------|
| ENSG00000076356 | PLXNA2   | 0.94891841  | 0.009535003 |
| ENSG00000130032 | PRRG3    | 0.948925662 | 0.008722556 |
| ENSG00000090989 | EXOC1    | 0.948939681 | 0.01022307  |
| ENSG00000115297 | TLX2     | 0.948952555 | 0.001376816 |
| ENSG00000100122 | CRYBB1   | 0.948958187 | 0.031170369 |
| ENSG00000150672 | DLG2     | 0.948974884 | 0.000360873 |
| ENSG00000168538 | TRAPPC11 | 0.948976376 | 0.025135723 |
| ENSG00000158571 | PFKFB1   | 0.948978857 | 0.033441983 |
| ENSG00000065413 | ANKRD44  | 0.948985548 | 0.000677635 |
| ENSG00000100038 | TOP3B    | 0.949004919 | 0.000497813 |
| ENSG00000174705 | SH3PXD2B | 0.949013167 | 8.51E-06    |
| ENSG00000163625 | WDFY3    | 0.949041502 | 0.001346233 |
| ENSG00000109208 | SMR3A    | 0.949077687 | 0.044379166 |
| ENSG00000182979 | MTA1     | 0.949085761 | 0.039813234 |
| ENSG00000178149 | DALRD3   | 0.949120723 | 0.020479408 |
| ENSG00000198521 | ZNF43    | 0.949120809 | 0.002076218 |
| ENSG00000144671 | SLC22A14 | 0.949144091 | 0.001283725 |
| ENSG00000183258 | DDX41    | 0.949157716 | 0.001237499 |
| ENSG00000185721 | DRG1     | 0.949162293 | 2.91E-05    |
| ENSG00000161634 | DCD      | 0.94919291  | 0.01089608  |
| ENSG00000095951 | HIVEP1   | 0.949198827 | 0.049341566 |
| ENSG00000258223 | PRSS58   | 0.949210413 | 0.003033799 |
| ENSG00000170382 | LRRN2    | 0.949211476 | 0.013286754 |
| ENSG00000144962 | SPATA16  | 0.949232297 | 0.000918362 |
| ENSG00000115211 | EIF2B4   | 0.949267954 | 0.005525059 |
| ENSG00000122692 | SMU1     | 0.949286705 | 0.002650995 |
| ENSG00000186448 | ZNF197   | 0.949287457 | 0.007345675 |
| ENSG00000253953 | PCDHGB4  | 0.949331465 | 0.001765412 |
| ENSG00000211809 | TRAV27   | 0.949334852 | 0.041193177 |
| ENSG00000105443 | CYTH2    | 0.949361635 | 0.018317254 |
| ENSG00000181929 | PRKAG1   | 0.949368732 | 0.000157203 |
| ENSG00000158748 | HTR6     | 0.949379374 | 0.002649694 |
| ENSG00000165102 | HGSNAT   | 0.949393101 | 0.000192245 |
| ENSG00000180509 | KCNE1    | 0.949393298 | 0.046811667 |
| ENSG00000073754 | CD5L     | 0.949401141 | 0.000647114 |
| ENSG00000155368 | DBI      | 0.949416588 | 0.000150767 |
| ENSG00000163686 | ABHD6    | 0.949439471 | 0.00585706  |
| ENSG00000182909 | LENG9    | 0.949443614 | 0.005240881 |
| ENSG00000169906 | S100G    | 0.949452799 | 0.006770596 |
| ENSG00000143507 | DUSP10   | 0.949459815 | 0.038016668 |
| ENSG00000102882 | MAPK3    | 0.949470625 | 0.016415326 |
| ENSG00000009307 | CSDE1    | 0.949494129 | 3.38E-05    |
| ENSG00000198677 | TTC37    | 0.94949802  | 0.000251163 |
| ENSG00000165916 | PSMC3    | 0.949536225 | 0.010442606 |
| ENSG00000151422 | FER      | 0.949620406 | 0.013165317 |
| ENSG00000110799 | VWF      | 0.949663156 | 0.000598318 |
| ENSG00000150628 | SPATA4   | 0.949668831 | 4.98E-06    |

|                 |            |             |             |
|-----------------|------------|-------------|-------------|
| ENSG00000203301 | AL590822.1 | 0.949679178 | 0.04494739  |
| ENSG00000133958 | UNC79      | 0.949685371 | 0.006711819 |
| ENSG00000100796 | SMEK1      | 0.949692976 | 1.33E-05    |
| ENSG00000182749 | PAQR7      | 0.949734276 | 0.031025514 |
| ENSG00000126391 | FRMD8      | 0.949759547 | 0.018259109 |
| ENSG00000197697 | HIST1H2BE  | 0.949795793 | 0.033064812 |
| ENSG00000242180 | OR51B5     | 0.949797814 | 0.000959173 |
| ENSG00000158301 | GPRASP2    | 0.949813055 | 0.008971798 |
| ENSG00000114867 | EIF4G1     | 0.949820843 | 0.01064422  |
| ENSG00000157916 | RER1       | 0.949830701 | 0.038848962 |
| ENSG00000110400 | PVRL1      | 0.949838104 | 0.015032002 |
| ENSG00000096080 | MRPS18A    | 0.949856772 | 0.013222001 |
| ENSG00000107623 | GDF10      | 0.949859241 | 0.045396452 |
| ENSG00000077721 | UBE2A      | 0.949874145 | 0.018724086 |
| ENSG00000171163 | ZNF692     | 0.949880626 | 0.001367039 |
| ENSG00000196150 | ZNF250     | 0.949883388 | 0.049920604 |
| ENSG00000138029 | HADHB      | 0.949886004 | 0.004113987 |
| ENSG00000106410 | NOBOX      | 0.949959792 | 0.001418312 |
| ENSG00000075975 | MKRN2      | 0.949997894 | 0.03922477  |
| ENSG00000153930 | ANKFN1     | 0.94999793  | 0.001261759 |
| ENSG00000171723 | GPHN       | 0.950027698 | 0.033324514 |
| ENSG00000138744 | NAAA       | 0.950038513 | 0.004443744 |
| ENSG00000139514 | SLC7A1     | 0.950057493 | 0.024397317 |
| ENSG00000105723 | GSK3A      | 0.950090926 | 2.27E-05    |
| ENSG00000168260 | C14orf183  | 0.950096472 | 0.0002528   |
| ENSG00000117640 | MTFR1L     | 0.950109539 | 0.001529073 |
| ENSG00000065243 | PKN2       | 0.950112037 | 0.000272398 |
| ENSG00000186047 | DLEU7      | 0.950160702 | 1.38E-05    |
| ENSG00000137817 | PARP6      | 0.950195467 | 0.017348028 |
| ENSG00000198728 | LDB1       | 0.950234631 | 0.001451168 |
| ENSG00000175646 | PRM1       | 0.950281711 | 0.017417714 |
| ENSG00000085365 | SCAMP1     | 0.950283897 | 0.00058748  |
| ENSG00000185630 | PBX1       | 0.950292732 | 0.047092051 |
| ENSG00000131068 | DEFB118    | 0.950296443 | 0.002530097 |
| ENSG00000175267 | VWA3A      | 0.950307681 | 0.011890343 |
| ENSG00000115488 | NEU2       | 0.950310659 | 0.011375961 |
| ENSG00000147854 | UHRF2      | 0.950316354 | 0.010974661 |
| ENSG00000165066 | NKX6-3     | 0.950318655 | 0.001116767 |
| ENSG00000136807 | CDK9       | 0.950324299 | 0.003227365 |
| ENSG00000196678 | ERI2       | 0.950327001 | 0.000354009 |
| ENSG00000073969 | NSF        | 0.950349413 | 6.04E-06    |
| ENSG00000111254 | AKAP3      | 0.95035193  | 0.002079675 |
| ENSG00000099622 | CIRBP      | 0.950362295 | 0.024732408 |
| ENSG00000100156 | SLC16A8    | 0.950405021 | 0.036758141 |
| ENSG00000144306 | SCRN3      | 0.950454122 | 0.012758219 |
| ENSG00000170142 | UBE2E1     | 0.950495816 | 0.000109464 |
| ENSG00000100146 | SOX10      | 0.950518912 | 0.006691072 |

|                 |              |             |             |
|-----------------|--------------|-------------|-------------|
| ENSG00000116171 | SCP2         | 0.950547877 | 1.40E-05    |
| ENSG00000163590 | PPM1L        | 0.950552849 | 0.006887881 |
| ENSG00000246922 | UBAP1L       | 0.950581761 | 0.002056171 |
| ENSG00000169231 | THBS3        | 0.950593233 | 0.00342162  |
| ENSG00000105516 | DBP          | 0.950603655 | 0.013592955 |
| ENSG00000089041 | P2RX7        | 0.950633247 | 0.045061649 |
| ENSG00000160818 | GPATCH4      | 0.95063962  | 0.012580281 |
| ENSG00000147050 | KDM6A        | 0.950643317 | 0.013895225 |
| ENSG00000142515 | KLK3         | 0.950651193 | 0.000282074 |
| ENSG00000138942 | RNF185       | 0.950653232 | 0.0298346   |
| ENSG00000163394 | CCKAR        | 0.950673944 | 0.004273952 |
| ENSG00000182379 | NXPH4        | 0.950725033 | 0.002875725 |
| ENSG00000060237 | WNK1         | 0.950732157 | 0.019722416 |
| ENSG00000168288 | MMADHC       | 0.950766347 | 0.04213574  |
| ENSG00000108849 | PPY          | 0.950768311 | 0.049325215 |
| ENSG00000125285 | SOX21        | 0.950768953 | 0.044596172 |
| ENSG00000062485 | CS           | 0.950772794 | 0.00061793  |
| ENSG00000145781 | COMMD10      | 0.950774076 | 0.01261376  |
| ENSG00000120949 | TNFRSF8      | 0.950810392 | 0.032042839 |
| ENSG00000131650 | KREMEN2      | 0.950813949 | 0.000351589 |
| ENSG00000101337 | TM9SF4       | 0.95081488  | 0.00275986  |
| ENSG00000177519 | RPRM         | 0.950816525 | 0.043935089 |
| ENSG00000130703 | OSBPL2       | 0.950837163 | 0.00074361  |
| ENSG00000167046 | RP11-93B14.6 | 0.950840736 | 0.023837868 |
| ENSG00000211672 | IGLV4-3      | 0.950844764 | 0.02721938  |
| ENSG00000181061 | HIGD1A       | 0.950853779 | 4.30E-07    |
| ENSG00000132703 | APCS         | 0.950871365 | 0.010942399 |
| ENSG00000204344 | STK19        | 0.950895201 | 0.008306377 |
| ENSG00000117222 | RBBP5        | 0.950926527 | 0.024880008 |
| ENSG00000157219 | HTR5A        | 0.95093193  | 0.007498713 |
| ENSG00000184986 | TMEM121      | 0.95095127  | 0.022968134 |
| ENSG00000118520 | ARG1         | 0.950952878 | 0.018893304 |
| ENSG00000204882 | GPR20        | 0.950957647 | 0.028326192 |
| ENSG00000196230 | TUBB         | 0.950988424 | 0.004489654 |
| ENSG00000101849 | TBL1X        | 0.950996043 | 0.026669011 |
| ENSG00000168286 | THAP11       | 0.951002804 | 0.01155091  |
| ENSG00000007968 | E2F2         | 0.95101051  | 0.02142597  |
| ENSG00000177688 | SUMO4        | 0.951023564 | 0.002795832 |
| ENSG00000167595 | C19orf55     | 0.951046293 | 0.01421569  |
| ENSG00000211801 | TRAV21       | 0.951046351 | 0.002077573 |
| ENSG00000091140 | DLD          | 0.951053788 | 0.003142665 |
| ENSG00000111266 | DUSP16       | 0.951058256 | 0.012258964 |
| ENSG00000178996 | SNX18        | 0.951069414 | 0.005184209 |
| ENSG00000113356 | POLR3G       | 0.951080772 | 0.000213216 |
| ENSG00000146826 | C7orf43      | 0.951131337 | 0.000124936 |
| ENSG00000182035 | ADIG         | 0.951168305 | 0.003365736 |
| ENSG00000165264 | NDUFB6       | 0.951169621 | 0.024449993 |

|                 |            |             |             |
|-----------------|------------|-------------|-------------|
| ENSG00000123171 | CCDC70     | 0.951174266 | 0.013120325 |
| ENSG00000196072 | BLOC1S2    | 0.951185203 | 0.016085131 |
| ENSG00000237524 | AC114783.1 | 0.951227497 | 0.004235749 |
| ENSG00000119401 | TRIM32     | 0.9512421   | 0.032220108 |
| ENSG00000164068 | RNF123     | 0.951263977 | 0.005089086 |
| ENSG00000043093 | DCUN1D1    | 0.951310516 | 0.000535714 |
| ENSG00000118816 | CCNI       | 0.951386957 | 0.000272769 |
| ENSG00000176623 | RMDN1      | 0.95138719  | 0.004719645 |
| ENSG00000074181 | NOTCH3     | 0.951388647 | 0.012109781 |
| ENSG00000213619 | NDUFS3     | 0.951399528 | 0.003330925 |
| ENSG00000153162 | BMP6       | 0.951440717 | 0.021942754 |
| ENSG00000150076 | C10ORF68   | 0.951453318 | 0.030316311 |
| ENSG00000099866 | MADCAM1    | 0.951458405 | 0.018081608 |
| ENSG00000268818 | AL049747.1 | 0.951471117 | 0.011829843 |
| ENSG00000008323 | PLEKHG6    | 0.951481445 | 0.038800339 |
| ENSG00000174015 | SPERT      | 0.951507755 | 0.000774393 |
| ENSG00000183631 | CXorf64    | 0.951530431 | 0.008338487 |
| ENSG00000104361 | NIPAL2     | 0.951539791 | 0.024326043 |
| ENSG00000155008 | APOOL      | 0.951541588 | 0.015126261 |
| ENSG00000167654 | ATCAY      | 0.951551097 | 0.045055122 |
| ENSG00000143553 | SNAPIN     | 0.951571612 | 0.000998921 |
| ENSG00000143437 | ARNT       | 0.951583403 | 0.000327046 |
| ENSG00000112619 | PRPH2      | 0.951595613 | 0.018994307 |
| ENSG00000147402 | GABRQ      | 0.951623283 | 0.000310647 |
| ENSG00000184895 | SRY        | 0.9516243   | 0.014884308 |
| ENSG00000107404 | DVL1       | 0.951639302 | 0.003308716 |
| ENSG00000188987 | HIST1H4D   | 0.951700297 | 0.036948704 |
| ENSG00000111875 | ASF1A      | 0.951705617 | 0.031304873 |
| ENSG00000160446 | ZDHHC12    | 0.951719308 | 0.000754998 |
| ENSG00000131844 | MCCC2      | 0.951733037 | 0.000737764 |
| ENSG00000131059 | BPIFA3     | 0.951761781 | 0.009600556 |
| ENSG00000172073 | TEX37      | 0.951772923 | 0.000120121 |
| ENSG00000167110 | GOLGA2     | 0.951786859 | 0.003343427 |
| ENSG00000121454 | LHX4       | 0.951796547 | 0.000284569 |
| ENSG00000155974 | GRIP1      | 0.951827322 | 0.017521191 |
| ENSG00000103051 | COG4       | 0.951839849 | 0.027603004 |
| ENSG00000213218 | CSH2       | 0.951850545 | 0.027989373 |
| ENSG00000111241 | FGF6       | 0.951859963 | 0.011273855 |
| ENSG00000123454 | DBH        | 0.951865532 | 0.028803077 |
| ENSG00000111669 | TPI1       | 0.951867212 | 0.001088048 |
| ENSG00000103375 | AQP8       | 0.951891697 | 0.016692868 |
| ENSG00000213676 | ATF6B      | 0.951899523 | 0.022324677 |
| ENSG00000196954 | CASP4      | 0.951932577 | 0.038241087 |
| ENSG00000129472 | RAB2B      | 0.951945689 | 0.000278092 |
| ENSG00000081177 | EXD2       | 0.951961971 | 0.002415627 |
| ENSG00000046774 | MAGEC2     | 0.951995969 | 0.007748038 |
| ENSG00000113141 | IK         | 0.952007752 | 2.20E-05    |

|                 |          |             |             |
|-----------------|----------|-------------|-------------|
| ENSG00000163632 | C3orf49  | 0.952007772 | 5.04E-05    |
| ENSG00000008438 | PGLYRP1  | 0.952019155 | 0.036837224 |
| ENSG00000166483 | WEE1     | 0.952026412 | 0.020835255 |
| ENSG00000135519 | KCNH3    | 0.952029632 | 0.000407292 |
| ENSG00000064419 | TNPO3    | 0.952033661 | 0.006283208 |
| ENSG00000211898 | IGHD     | 0.95204329  | 0.000672113 |
| ENSG00000012822 | CALCOCO1 | 0.952043456 | 0.006086997 |
| ENSG00000105221 | AKT2     | 0.952046841 | 0.007471688 |
| ENSG00000132613 | MTSS1L   | 0.952049021 | 0.00346981  |
| ENSG00000182393 | IFNL1    | 0.952059442 | 0.000174468 |
| ENSG00000112308 | C6orf62  | 0.952068335 | 0.021360449 |
| ENSG00000100359 | SGSM3    | 0.952071711 | 0.004649791 |
| ENSG00000147724 | FAM135B  | 0.952100384 | 2.20E-05    |
| ENSG00000151151 | IPMK     | 0.952111836 | 0.000262186 |
| ENSG00000125965 | GDF5     | 0.952119775 | 0.025731914 |
| ENSG00000175970 | UNC119B  | 0.952121492 | 0.000108339 |
| ENSG00000104499 | GML      | 0.952137682 | 0.000790072 |
| ENSG00000168301 | KCTD6    | 0.952138621 | 0.013724115 |
| ENSG00000170577 | SIX2     | 0.952158623 | 0.016917365 |
| ENSG00000112146 | FBXO9    | 0.952165588 | 0.028778305 |
| ENSG00000145741 | BTF3     | 0.952190182 | 5.55E-05    |
| ENSG00000160218 | TRAPPC10 | 0.95219168  | 0.008512762 |
| ENSG00000164134 | NAA15    | 0.952221343 | 0.004288853 |
| ENSG00000183813 | CCR4     | 0.952232113 | 0.001319843 |
| ENSG00000165061 | ZMAT4    | 0.952239834 | 0.026921555 |
| ENSG00000018625 | ATP1A2   | 0.952263274 | 0.01422129  |
| ENSG00000115839 | RAB3GAP1 | 0.952281776 | 8.52E-05    |
| ENSG00000026508 | CD44     | 0.952310444 | 0.035919561 |
| ENSG00000181778 | TMEM252  | 0.952342309 | 0.00220115  |
| ENSG00000211818 | TRAV39   | 0.952355783 | 0.000162391 |
| ENSG00000129744 | ART1     | 0.952371289 | 7.98E-06    |
| ENSG00000126214 | KLC1     | 0.952392311 | 0.000212359 |
| ENSG00000173614 | NMNAT1   | 0.952393896 | 0.003762238 |
| ENSG00000172752 | COL6A5   | 0.952450567 | 0.000168341 |
| ENSG00000133101 | CCNA1    | 0.952482455 | 0.001096279 |
| ENSG00000154767 | XPC      | 0.952488417 | 0.000384362 |
| ENSG00000125510 | OPRL1    | 0.95252796  | 0.039350021 |
| ENSG00000159023 | EPB41    | 0.952558548 | 1.76E-05    |
| ENSG00000169877 | AHSP     | 0.952558684 | 0.000195662 |
| ENSG00000174839 | DENND6A  | 0.952561003 | 0.000133561 |
| ENSG00000175414 | ARL10    | 0.952571809 | 7.14E-05    |
| ENSG00000116120 | FARSB    | 0.952578245 | 0.011955624 |
| ENSG00000111203 | ITFG2    | 0.952596685 | 0.021055156 |
| ENSG00000149923 | PPP4C    | 0.952614624 | 0.023713981 |
| ENSG00000213316 | LTC4S    | 0.952615005 | 0.01854114  |
| ENSG00000128524 | ATP6V1F  | 0.952619887 | 0.006692801 |
| ENSG00000141562 | NARF     | 0.952658285 | 0.01514796  |

|                 |            |             |             |
|-----------------|------------|-------------|-------------|
| ENSG00000151093 | OXSM       | 0.952665198 | 0.002571366 |
| ENSG00000003756 | RBM5       | 0.952682329 | 0.000387858 |
| ENSG00000102195 | GPR50      | 0.952689291 | 0.003144452 |
| ENSG00000134852 | CLOCK      | 0.952708052 | 0.028905845 |
| ENSG00000073169 | SELO       | 0.952722195 | 0.037118714 |
| ENSG00000134489 | HRH4       | 0.952765836 | 0.025970141 |
| ENSG00000112033 | PPARD      | 0.952790142 | 0.042282681 |
| ENSG00000067191 | CACNB1     | 0.952807117 | 0.008841144 |
| ENSG00000135720 | DYNC1LI2   | 0.952818704 | 1.24E-05    |
| ENSG00000109519 | GRPEL1     | 0.952831291 | 0.002667131 |
| ENSG00000198258 | UBL5       | 0.952857305 | 0.009861668 |
| ENSG00000157343 | ARMC12     | 0.95291917  | 0.000397065 |
| ENSG00000158874 | APOA2      | 0.952925772 | 0.035767498 |
| ENSG00000214189 | ZNF788     | 0.952958479 | 0.047390973 |
| ENSG00000105205 | CLC        | 0.952960154 | 0.006214995 |
| ENSG00000002330 | BAD        | 0.952961401 | 0.019806866 |
| ENSG00000131864 | USP29      | 0.952963784 | 0.049151742 |
| ENSG00000168256 | NKIRAS2    | 0.953010499 | 0.020917872 |
| ENSG00000008086 | CDKL5      | 0.953022849 | 0.041086544 |
| ENSG00000138738 | PRDM5      | 0.953025642 | 0.034506031 |
| ENSG00000159592 | GPBP1L1    | 0.953045273 | 0.000165242 |
| ENSG00000255833 | TIFAB      | 0.95305013  | 0.003355923 |
| ENSG00000134249 | ADAM30     | 0.953066256 | 0.043118901 |
| ENSG00000167615 | LENG8      | 0.953067031 | 0.011182526 |
| ENSG00000118094 | TREH       | 0.953077719 | 0.009690104 |
| ENSG00000119720 | NRDE2      | 0.953088342 | 0.032646824 |
| ENSG00000090263 | MRPS33     | 0.95309034  | 0.00802733  |
| ENSG00000128805 | ARHGAP22   | 0.953114025 | 0.004767136 |
| ENSG00000267941 | AC008267.1 | 0.953132508 | 0.000205221 |
| ENSG00000135597 | REPS1      | 0.953147871 | 0.014476038 |
| ENSG00000141194 | OR4D1      | 0.953157426 | 0.001419008 |
| ENSG00000112651 | MRPL2      | 0.953162737 | 0.02448575  |
| ENSG00000145194 | ECE2       | 0.953185564 | 0.046265463 |
| ENSG00000157240 | FZD1       | 0.953188935 | 0.005109924 |
| ENSG00000215375 | MYL5       | 0.953191201 | 0.027853399 |
| ENSG00000129535 | NRL        | 0.953217771 | 0.023361591 |
| ENSG00000118271 | TTR        | 0.953232495 | 0.005864156 |
| ENSG00000130414 | NDUFA10    | 0.95325531  | 1.59E-07    |
| ENSG00000125037 | EMC3       | 0.953257064 | 0.005963566 |
| ENSG00000130821 | SLC6A8     | 0.953265286 | 0.033100555 |
| ENSG00000166938 | DIS3L      | 0.953289726 | 0.039770357 |
| ENSG00000160882 | CYP11B1    | 0.953291434 | 0.031141784 |
| ENSG00000088926 | F11        | 0.953301705 | 0.020396274 |
| ENSG00000163694 | RBM47      | 0.953309796 | 0.00021326  |
| ENSG00000099840 | IZUMO4     | 0.953313993 | 0.014551444 |
| ENSG00000132383 | RPA1       | 0.95334409  | 0.005262431 |
| ENSG00000117016 | RIMS3      | 0.953344985 | 0.028424262 |

|                 |           |             |             |
|-----------------|-----------|-------------|-------------|
| ENSG00000029559 | IBSP      | 0.953353017 | 0.01331933  |
| ENSG00000114354 | TFG       | 0.953354022 | 0.001204447 |
| ENSG00000079557 | AFM       | 0.953357275 | 0.035748561 |
| ENSG00000142961 | MOB3C     | 0.953362495 | 1.90E-05    |
| ENSG00000170549 | IRX1      | 0.953369179 | 0.018697593 |
| ENSG00000143473 | KCNH1     | 0.9533702   | 0.01837126  |
| ENSG00000204195 | AWAT1     | 0.9533755   | 0.000183575 |
| ENSG00000185972 | CCIN      | 0.953390248 | 0.030613695 |
| ENSG00000186567 | CEACAM19  | 0.953391877 | 0.001932311 |
| ENSG00000066230 | SLC9A3    | 0.953392586 | 0.042100315 |
| ENSG00000148143 | ZNF462    | 0.95339756  | 0.014516834 |
| ENSG00000102098 | SCML2     | 0.953403397 | 0.01248981  |
| ENSG00000093010 | COMT      | 0.953430207 | 0.023956654 |
| ENSG00000180205 | WFDC9     | 0.953448482 | 4.49E-05    |
| ENSG00000197079 | KRT35     | 0.953455308 | 0.003902882 |
| ENSG00000123066 | MED13L    | 0.953524631 | 0.011962504 |
| ENSG00000137806 | NDUFAF1   | 0.953531279 | 0.047443786 |
| ENSG00000005882 | PDK2      | 0.953532269 | 0.002948868 |
| ENSG00000120500 | ARR3      | 0.953541173 | 0.020733446 |
| ENSG00000115194 | SLC30A3   | 0.953547665 | 4.86E-05    |
| ENSG00000130545 | CRB3      | 0.953561693 | 0.003031672 |
| ENSG00000213638 | ADAT3     | 0.953574805 | 0.000570398 |
| ENSG00000197125 | OR8B8     | 0.953583747 | 0.000661298 |
| ENSG00000184502 | GAST      | 0.953587176 | 0.028133516 |
| ENSG00000162496 | DHRS3     | 0.953599706 | 0.042657035 |
| ENSG00000135413 | LACRT     | 0.953618773 | 0.006287066 |
| ENSG00000170631 | ZNF16     | 0.953621559 | 0.017023634 |
| ENSG00000169836 | TACR3     | 0.95363702  | 0.015730096 |
| ENSG00000179564 | LSMEM2    | 0.953671876 | 9.85E-05    |
| ENSG00000169777 | TAS2R1    | 0.953672599 | 0.018840213 |
| ENSG00000108423 | TUBD1     | 0.953678302 | 0.036946006 |
| ENSG00000138293 | NCOA4     | 0.953706716 | 6.45E-06    |
| ENSG00000184388 | PABPC1L2B | 0.953733959 | 0.003586829 |
| ENSG00000100347 | SAMM50    | 0.953741254 | 0.003356886 |
| ENSG00000163743 | RCHY1     | 0.953749023 | 0.000235334 |
| ENSG00000171552 | BCL2L1    | 0.953763881 | 0.000991505 |
| ENSG00000075043 | KCNQ2     | 0.953771776 | 0.046695215 |
| ENSG00000170099 | SERPINA6  | 0.953777896 | 0.000505618 |
| ENSG00000170807 | LMOD2     | 0.953778411 | 0.002547232 |
| ENSG00000100100 | PIK3IP1   | 0.953781403 | 0.00265552  |
| ENSG00000126861 | OMG       | 0.953798252 | 0.000674404 |
| ENSG00000165934 | CPSF2     | 0.953799792 | 0.000704209 |
| ENSG00000162735 | PEX19     | 0.953824505 | 0.044177609 |
| ENSG00000172568 | FNDC9     | 0.953841291 | 0.000813758 |
| ENSG00000095319 | NUP188    | 0.953857465 | 0.004655606 |
| ENSG00000066468 | FGFR2     | 0.95386738  | 0.031070843 |
| ENSG00000186891 | TNFRSF18  | 0.953884209 | 0.00141078  |

|                 |          |             |             |
|-----------------|----------|-------------|-------------|
| ENSG00000165630 | PRPF18   | 0.95389691  | 6.99E-05    |
| ENSG00000010318 | PHF7     | 0.953909773 | 7.60E-07    |
| ENSG00000036672 | USP2     | 0.953916435 | 0.040922929 |
| ENSG00000166557 | TMED3    | 0.953921916 | 0.000335283 |
| ENSG00000204880 | KRTAP4-8 | 0.953927246 | 0.024716921 |
| ENSG00000118579 | MED28    | 0.953938137 | 0.000246369 |
| ENSG00000104805 | NUCB1    | 0.953966013 | 0.029586619 |
| ENSG00000184029 | DSCR4    | 0.953983654 | 0.00020171  |
| ENSG00000144655 | CSRNP1   | 0.953988372 | 0.019769878 |
| ENSG00000166960 | CCDC178  | 0.953995734 | 0.006019015 |
| ENSG00000152409 | JMY      | 0.954011167 | 0.027284964 |
| ENSG00000088832 | FKBP1A   | 0.954028468 | 0.005431539 |
| ENSG00000145723 | GIN1     | 0.954037216 | 0.041226136 |
| ENSG00000112599 | GUCA1B   | 0.95407614  | 0.014470098 |
| ENSG00000013583 | HEBP1    | 0.954094148 | 0.04063122  |
| ENSG00000137267 | TUBB2A   | 0.954110097 | 0.038455624 |
| ENSG00000100197 | CYP2D6   | 0.954118447 | 0.031552071 |
| ENSG00000075303 | SLC25A40 | 0.954146131 | 0.008480661 |
| ENSG00000196177 | ACADSB   | 0.954148431 | 0.043951432 |
| ENSG00000134200 | TSHB     | 0.954170387 | 0.036184714 |
| ENSG00000077092 | RARB     | 0.954204365 | 0.000506978 |
| ENSG00000204174 | NPY4R    | 0.95421023  | 0.010671509 |
| ENSG00000117139 | KDM5B    | 0.954232351 | 0.0030012   |
| ENSG00000168556 | ING2     | 0.954235812 | 0.012860937 |
| ENSG00000158113 | LRRC43   | 0.954236322 | 0.000103845 |
| ENSG00000110665 | C11orf21 | 0.954249754 | 0.001089002 |
| ENSG00000256683 | ZNF350   | 0.954256257 | 0.044274715 |
| ENSG00000119638 | NEK9     | 0.954265349 | 3.12E-05    |
| ENSG00000171804 | WDR87    | 0.95426603  | 0.00036167  |
| ENSG00000096093 | EFHC1    | 0.954294649 | 0.044858804 |
| ENSG00000100034 | PPM1F    | 0.954298302 | 0.028821248 |
| ENSG00000244482 | LILRA6   | 0.954304687 | 0.004419828 |
| ENSG00000124212 | PTGIS    | 0.954311469 | 0.04206271  |
| ENSG00000139626 | ITGB7    | 0.954320251 | 0.010134275 |
| ENSG00000183569 | SERHL2   | 0.954343701 | 2.14E-05    |
| ENSG00000121743 | GJA3     | 0.954363753 | 0.038471722 |
| ENSG00000196176 | HIST1H4A | 0.954377526 | 0.0182807   |
| ENSG00000197721 | CR1L     | 0.954386632 | 0.00328216  |
| ENSG00000170779 | CDCA4    | 0.954387353 | 0.020838571 |
| ENSG0000006071  | ABCC8    | 0.954392234 | 0.044206148 |
| ENSG00000163606 | CD200R1  | 0.954422732 | 0.000311392 |
| ENSG00000149742 | SLC22A9  | 0.954429527 | 0.001739913 |
| ENSG00000163217 | BMP10    | 0.954432326 | 0.020175744 |
| ENSG00000145016 | KIAA0226 | 0.954432331 | 0.034545798 |
| ENSG00000134539 | KLRD1    | 0.954433811 | 0.000999608 |
| ENSG00000124564 | SLC17A3  | 0.954437035 | 0.035890687 |
| ENSG00000115091 | ACTR3    | 0.954445703 | 4.31E-08    |

|                 |            |             |             |
|-----------------|------------|-------------|-------------|
| ENSG00000185808 | PIGP       | 0.954449575 | 0.03474008  |
| ENSG00000187013 | C17orf82   | 0.954451213 | 0.004396061 |
| ENSG00000047936 | ROS1       | 0.954461725 | 0.022473776 |
| ENSG00000140374 | ETFA       | 0.954467101 | 0.002051686 |
| ENSG00000166886 | NAB2       | 0.954489385 | 0.000398649 |
| ENSG00000133731 | IMPA1      | 0.954515755 | 0.007545359 |
| ENSG00000105289 | TJP3       | 0.954531306 | 0.024222792 |
| ENSG00000158321 | AUTS2      | 0.954545409 | 0.018582409 |
| ENSG00000134548 | C12orf39   | 0.954552323 | 0.016113267 |
| ENSG00000228594 | C1orf233   | 0.954566028 | 0.017065642 |
| ENSG00000110801 | PSMD9      | 0.954566367 | 0.033344194 |
| ENSG00000088986 | DYNLL1     | 0.954588511 | 0.004682999 |
| ENSG00000156521 | TYSND1     | 0.954589427 | 2.59E-05    |
| ENSG00000204904 | CXorf31    | 0.954596246 | 0.006190498 |
| ENSG00000181323 | SPEM1      | 0.954604372 | 0.008783898 |
| ENSG00000173264 | GPR137     | 0.954608069 | 0.006626033 |
| ENSG00000184566 | AC132216.1 | 0.954611445 | 0.001188435 |
| ENSG00000119801 | YPEL5      | 0.954614019 | 0.000778313 |
| ENSG00000131653 | TRAF7      | 0.954628783 | 0.000177102 |
| ENSG00000166405 | RIC3       | 0.954632369 | 0.007795187 |
| ENSG00000026559 | KCNG1      | 0.954661263 | 0.019190238 |
| ENSG00000115548 | KDM3A      | 0.954662884 | 0.005062432 |
| ENSG00000196182 | STK40      | 0.954712909 | 0.00017456  |
| ENSG00000166736 | HTR3A      | 0.954785133 | 0.034483072 |
| ENSG00000198598 | MMP17      | 0.954789084 | 0.038902755 |
| ENSG00000115685 | PPP1R7     | 0.954810837 | 0.000419095 |
| ENSG00000102900 | NUP93      | 0.954811987 | 0.00965139  |
| ENSG00000109046 | WSB1       | 0.954830586 | 0.006885454 |
| ENSG00000182372 | CLN8       | 0.954836543 | 0.019758182 |
| ENSG00000103154 | NECAB2     | 0.954837077 | 0.020155061 |
| ENSG00000185046 | ANKS1B     | 0.954846308 | 0.005601154 |
| ENSG00000178522 | AMBN       | 0.954852148 | 0.006699625 |
| ENSG00000135898 | GPR55      | 0.954880349 | 0.013170873 |
| ENSG00000162365 | CYP4A22    | 0.954891583 | 0.000688543 |
| ENSG00000101546 | RBFA       | 0.954897624 | 0.021563066 |
| ENSG00000106571 | GLI3       | 0.954908421 | 0.005195379 |
| ENSG00000104142 | VPS18      | 0.954932668 | 0.00589323  |
| ENSG00000106144 | CASP2      | 0.954943611 | 2.30E-06    |
| ENSG00000079337 | RAPGEF3    | 0.954954721 | 0.00500135  |
| ENSG00000155329 | ZCCHC10    | 0.954955686 | 0.010897585 |
| ENSG00000012211 | PRICKLE3   | 0.954986005 | 0.037779025 |
| ENSG00000121898 | CPXM2      | 0.9549945   | 0.002695484 |
| ENSG00000139725 | RHOF       | 0.955008076 | 0.004387249 |
| ENSG00000065491 | TBC1D22B   | 0.955015614 | 0.001299103 |
| ENSG00000151458 | ANKRD50    | 0.955018447 | 0.031413267 |
| ENSG00000211780 | TRAV6      | 0.955035053 | 0.00522329  |
| ENSG00000180185 | FAHD1      | 0.955035064 | 0.033666225 |

|                 |            |             |             |
|-----------------|------------|-------------|-------------|
| ENSG00000166225 | FRS2       | 0.95504854  | 0.016364004 |
| ENSG00000102104 | RS1        | 0.955063942 | 0.011473778 |
| ENSG00000109158 | GABRA4     | 0.955078309 | 0.038110761 |
| ENSG00000174282 | ZBTB4      | 0.955094191 | 0.00156124  |
| ENSG00000075035 | WSCD2      | 0.955098115 | 0.009274437 |
| ENSG00000114353 | GNAI2      | 0.955124662 | 0.036556087 |
| ENSG00000170523 | KRT83      | 0.955132967 | 0.004239429 |
| ENSG00000077327 | SPAG6      | 0.955142376 | 0.043341011 |
| ENSG00000089250 | NOS1       | 0.955148802 | 9.27E-08    |
| ENSG00000206199 | ANKUB1     | 0.955152209 | 0.001527409 |
| ENSG00000198793 | MTOR       | 0.955156347 | 0.01725304  |
| ENSG00000196459 | TRAPPC2    | 0.955163837 | 0.003036629 |
| ENSG00000172927 | MYEOV      | 0.955175529 | 0.027402612 |
| ENSG00000204414 | CSHL1      | 0.955194916 | 2.01E-05    |
| ENSG00000183134 | PTGDR2     | 0.955205103 | 0.008194992 |
| ENSG00000177692 | DNAJC28    | 0.955212813 | 0.021964352 |
| ENSG00000137275 | RIPK1      | 0.955220708 | 0.005179812 |
| ENSG00000155508 | CNOT8      | 0.955300489 | 0.006023189 |
| ENSG00000135127 | CCDC64     | 0.955305613 | 0.02068878  |
| ENSG00000156885 | COX6A2     | 0.955384791 | 0.001202925 |
| ENSG00000028528 | SNX1       | 0.955400746 | 0.002014891 |
| ENSG00000013619 | MAMLD1     | 0.955406318 | 0.038736587 |
| ENSG00000172717 | FAM71D     | 0.955411331 | 0.003140418 |
| ENSG00000162236 | STX5       | 0.955419484 | 0.023308543 |
| ENSG00000165646 | SLC18A2    | 0.955427477 | 0.003271159 |
| ENSG00000148798 | INA        | 0.95542801  | 0.049547814 |
| ENSG00000070501 | POLB       | 0.955428085 | 0.00094163  |
| ENSG00000185038 | MROH2A     | 0.955447628 | 0.002504253 |
| ENSG00000184672 | RALYL      | 0.955454745 | 0.013376271 |
| ENSG00000197006 | METTL9     | 0.955468476 | 0.000191338 |
| ENSG00000203685 | C1orf95    | 0.955501202 | 0.000412019 |
| ENSG00000171953 | ATPAF2     | 0.955507249 | 0.002571075 |
| ENSG00000221813 | OR6B1      | 0.955510037 | 0.003562059 |
| ENSG00000134207 | SYT6       | 0.955533368 | 0.006364203 |
| ENSG00000167791 | CABP2      | 0.955536729 | 0.044538136 |
| ENSG00000111058 | ACSS3      | 0.955556036 | 0.039688916 |
| ENSG00000138018 | EPT1       | 0.955575522 | 0.003011315 |
| ENSG00000113262 | GRM6       | 0.955596504 | 0.040271745 |
| ENSG00000141314 | RHBDL3     | 0.955605069 | 2.29E-05    |
| ENSG00000149488 | TMC2       | 0.955620993 | 0.000481901 |
| ENSG00000180613 | GSX2       | 0.955629872 | 0.0084759   |
| ENSG00000104381 | GDAP1      | 0.95564307  | 0.017759004 |
| ENSG00000133858 | ZFC3H1     | 0.955755161 | 0.002366795 |
| ENSG00000181666 | HKR1       | 0.9557991   | 6.90E-05    |
| ENSG00000143847 | PPFIA4     | 0.955806195 | 0.013065935 |
| ENSG00000177051 | FBXO46     | 0.955824126 | 0.020477124 |
| ENSG00000212670 | AL161915.1 | 0.955845958 | 0.000975556 |

|                 |            |             |             |
|-----------------|------------|-------------|-------------|
| ENSG00000037637 | FBXO42     | 0.95585853  | 0.000767667 |
| ENSG00000100109 | TFIP11     | 0.955925435 | 0.000743524 |
| ENSG00000100439 | ABHD4      | 0.955926275 | 0.008778739 |
| ENSG00000164645 | C7orf62    | 0.955928223 | 0.028029362 |
| ENSG00000118260 | CREB1      | 0.955934988 | 8.13E-05    |
| ENSG00000159720 | ATP6V0D1   | 0.955953646 | 0.014489562 |
| ENSG00000175809 | ZNF645     | 0.955958381 | 0.009138546 |
| ENSG00000162909 | CAPN2      | 0.955963953 | 0.017364617 |
| ENSG00000183715 | OPCML      | 0.955976079 | 0.00567024  |
| ENSG00000068400 | GRIPAP1    | 0.955981672 | 0.021390581 |
| ENSG00000269676 | MUC8       | 0.955995091 | 0.034073092 |
| ENSG00000227839 | AL645730.2 | 0.955997189 | 0.002615551 |
| ENSG00000124693 | HIST1H3B   | 0.956014754 | 0.009675285 |
| ENSG00000034713 | GABARAPL2  | 0.956020226 | 0.042990544 |
| ENSG00000173153 | ESRRA      | 0.956020734 | 0.001891008 |
| ENSG00000124783 | SSR1       | 0.956039785 | 0.00044227  |
| ENSG00000204628 | GNB2L1     | 0.956049861 | 0.004239032 |
| ENSG00000211805 | TRAV24     | 0.956064033 | 0.0050162   |
| ENSG00000167257 | RNF214     | 0.956068342 | 0.005908796 |
| ENSG00000256762 | STH        | 0.956106786 | 0.009696779 |
| ENSG00000138813 | C4orf17    | 0.956107343 | 0.007848868 |
| ENSG00000069998 | CECR5      | 0.9561286   | 0.03527182  |
| ENSG00000134245 | WNT2B      | 0.95613514  | 0.004685255 |
| ENSG00000172081 | MOB3A      | 0.956137051 | 0.000103033 |
| ENSG00000001460 | STPG1      | 0.956137836 | 0.020469533 |
| ENSG00000176635 | HORMAD2    | 0.956137929 | 0.002056149 |
| ENSG00000243978 | RGAG1      | 0.9561383   | 0.001678116 |
| ENSG00000175764 | TLL11      | 0.956138485 | 0.003001254 |
| ENSG00000206527 | PTPLB      | 0.956141995 | 0.001001345 |
| ENSG00000179284 | DAND5      | 0.956171534 | 0.016721844 |
| ENSG00000137815 | RTF1       | 0.956183993 | 1.05E-05    |
| ENSG00000171794 | UTF1       | 0.956196043 | 0.04245388  |
| ENSG00000100603 | SNW1       | 0.956198751 | 0.003319991 |
| ENSG00000108443 | RPS6KB1    | 0.956204376 | 0.02635884  |
| ENSG00000102290 | PCDH11X    | 0.956225999 | 0.007212322 |
| ENSG00000130957 | FBP2       | 0.956235241 | 0.049386717 |
| ENSG00000108578 | BLMH       | 0.956237911 | 0.026224953 |
| ENSG00000104231 | ZFAND1     | 0.956248517 | 0.034379077 |
| ENSG00000152254 | G6PC2      | 0.956249614 | 0.001665224 |
| ENSG00000182329 | AC079354.1 | 0.956253133 | 0.010758645 |
| ENSG00000080573 | COL5A3     | 0.95627601  | 0.007409188 |
| ENSG00000198933 | TBKBP1     | 0.956278616 | 0.016204807 |
| ENSG00000133961 | NUMB       | 0.956285271 | 0.010283196 |
| ENSG00000179709 | NLRP8      | 0.956308984 | 0.008641865 |
| ENSG00000141977 | CIB3       | 0.956314023 | 1.74E-05    |
| ENSG00000124196 | GTSF1L     | 0.956331053 | 0.013862249 |
| ENSG00000181418 | DDN        | 0.95633928  | 0.031534006 |

|                |              |             |             |
|----------------|--------------|-------------|-------------|
| ENSG0000006114 | SYNRG        | 0.956384054 | 0.001638375 |
| ENSG0000163206 | SMCP         | 0.956398568 | 0.012857981 |
| ENSG0000198271 | KRTAP4-5     | 0.956399863 | 0.00632467  |
| ENSG0000173542 | MOB1B        | 0.956413542 | 0.043116075 |
| ENSG0000105549 | THEG         | 0.956443744 | 0.008805572 |
| ENSG0000242221 | PSG2         | 0.95644698  | 0.007504458 |
| ENSG0000070778 | PTPN21       | 0.956447805 | 0.002348245 |
| ENSG0000206053 | HN1L         | 0.956454276 | 0.000357869 |
| ENSG0000164175 | SLC45A2      | 0.956455301 | 0.001325122 |
| ENSG0000139428 | MMAB         | 0.956457594 | 0.000669698 |
| ENSG0000182255 | KCNA4        | 0.956462935 | 0.047208391 |
| ENSG0000006788 | MYH13        | 0.956467277 | 0.03979868  |
| ENSG0000143257 | NR1I3        | 0.95648563  | 0.045193208 |
| ENSG0000130751 | NPAS1        | 0.956489741 | 0.045392338 |
| ENSG0000179152 | TCAIM        | 0.956499706 | 0.002396371 |
| ENSG0000155087 | ODF1         | 0.956508955 | 0.018201612 |
| ENSG0000117601 | SERPINC1     | 0.95652629  | 0.032699528 |
| ENSG0000067560 | RHOA         | 0.95655099  | 0.006470319 |
| ENSG0000203795 | FAM24A       | 0.956586039 | 0.000320258 |
| ENSG0000109047 | RCVRN        | 0.956591665 | 0.015655554 |
| ENSG0000133460 | SLC2A11      | 0.956603973 | 0.015889863 |
| ENSG0000166152 | C16orf78     | 0.956611235 | 0.003759953 |
| ENSG0000109390 | NDUFC1       | 0.956616736 | 0.007047353 |
| ENSG0000186153 | WVOX         | 0.956623216 | 0.004046531 |
| ENSG0000211795 | TRAV8-6      | 0.956623341 | 0.048626197 |
| ENSG0000172215 | CXCR6        | 0.956647365 | 0.035728187 |
| ENSG0000134030 | CTIF         | 0.956657693 | 0.002141563 |
| ENSG0000145817 | YIPF5        | 0.956674331 | 0.005710588 |
| ENSG0000186352 | ANKRD37      | 0.956682935 | 0.004200327 |
| ENSG0000166603 | MC4R         | 0.956699197 | 0.013703688 |
| ENSG0000181790 | BAI1         | 0.956708961 | 0.024875755 |
| ENSG0000165714 | LOH12CR1     | 0.956731439 | 0.000295415 |
| ENSG0000159593 | NAE1         | 0.956744823 | 0.033268497 |
| ENSG0000172869 | DMXL1        | 0.956755293 | 0.03744844  |
| ENSG0000167281 | RBFOX3       | 0.956773919 | 0.000491526 |
| ENSG0000124120 | TTPAL        | 0.956774952 | 0.011635355 |
| ENSG0000116726 | PRAMEF12     | 0.956824713 | 0.009645819 |
| ENSG0000087152 | ATXN7L3      | 0.956828959 | 0.005505831 |
| ENSG0000175104 | TRAF6        | 0.956838413 | 0.009500723 |
| ENSG0000152348 | ATG10        | 0.956854806 | 0.001656542 |
| ENSG0000067182 | TNFRSF1A     | 0.956861123 | 0.00968115  |
| ENSG0000170222 | ADPRM        | 0.956906724 | 0.017432436 |
| ENSG0000122133 | PAEP         | 0.956910677 | 0.030107272 |
| ENSG0000255284 | AP006621.5   | 0.956913191 | 0.001770757 |
| ENSG0000090512 | FETUB        | 0.95695407  | 0.034538749 |
| ENSG0000121314 | TAS2R8       | 0.956978614 | 0.003838149 |
| ENSG0000258539 | RP11-12J10.3 | 0.95698984  | 0.012721827 |

|                 |               |             |             |
|-----------------|---------------|-------------|-------------|
| ENSG00000169297 | NR0B1         | 0.957008148 | 0.014017777 |
| ENSG00000166783 | KIAA0430      | 0.957013193 | 0.000378977 |
| ENSG00000256018 | HIST1H3G      | 0.957033087 | 0.017911969 |
| ENSG00000121067 | SPOP          | 0.957044175 | 0.016624213 |
| ENSG00000003400 | CASP10        | 0.957051236 | 0.000134761 |
| ENSG00000122367 | LDB3          | 0.957054786 | 0.022940495 |
| ENSG00000088833 | NSFL1C        | 0.957080897 | 0.008798021 |
| ENSG00000184302 | SIX6          | 0.957083298 | 0.023864254 |
| ENSG00000165678 | GHITM         | 0.957086598 | 0.01032281  |
| ENSG00000156222 | SLC28A1       | 0.957089207 | 0.002765116 |
| ENSG00000178035 | IMPDH2        | 0.957097358 | 0.030162406 |
| ENSG00000027644 | INSRR         | 0.957107916 | 0.016774989 |
| ENSG00000078668 | VDAC3         | 0.957119623 | 0.010469987 |
| ENSG00000266956 | CTB-186H2.3   | 0.957131491 | 0.006328969 |
| ENSG00000114315 | HES1          | 0.957143632 | 0.007309033 |
| ENSG00000109911 | ELP4          | 0.957190952 | 0.047127674 |
| ENSG00000081014 | AP4E1         | 0.957195822 | 0.033593364 |
| ENSG00000198336 | MYL4          | 0.957203666 | 0.00065313  |
| ENSG00000183918 | SH2D1A        | 0.957221516 | 0.021349955 |
| ENSG00000120669 | SOHLH2        | 0.95723556  | 0.004863852 |
| ENSG00000107611 | CUBN          | 0.957235807 | 0.001926074 |
| ENSG00000267106 | C19orf82      | 0.957242617 | 0.001748705 |
| ENSG00000137944 | CCBL2         | 0.957281392 | 0.020505441 |
| ENSG00000160685 | ZBTB7B        | 0.957289952 | 0.04439788  |
| ENSG00000172053 | QARS          | 0.957306263 | 0.021480293 |
| ENSG00000137601 | NEK1          | 0.957315464 | 0.037210904 |
| ENSG00000100399 | CHADL         | 0.957327189 | 0.001109663 |
| ENSG00000167825 | OR5I1         | 0.957338396 | 0.003449967 |
| ENSG00000237435 | RP11-147C23.1 | 0.957343635 | 0.000313722 |
| ENSG00000164100 | NDST3         | 0.957354439 | 0.010082526 |
| ENSG00000148688 | RPP30         | 0.957355206 | 0.002712082 |
| ENSG00000011028 | MRC2          | 0.957369457 | 0.017902044 |
| ENSG00000063046 | EIF4B         | 0.957373262 | 0.020874074 |
| ENSG00000269165 | AC069547.1    | 0.957394782 | 0.029431357 |
| ENSG00000131264 | CDX4          | 0.957401973 | 0.009571655 |
| ENSG00000127824 | TUBA4A        | 0.957409487 | 0.021042869 |
| ENSG00000130201 | EXOC3L2       | 0.957449347 | 0.009072677 |
| ENSG00000141506 | PIK3R5        | 0.957465814 | 0.019310626 |
| ENSG00000185973 | TMLHE         | 0.957474334 | 0.028909056 |
| ENSG00000136379 | ABHD17C       | 0.957513336 | 0.020867742 |
| ENSG00000144681 | STAC          | 0.957543235 | 0.00872408  |
| ENSG00000267496 | FAM215A       | 0.957543281 | 0.028406558 |
| ENSG00000005243 | COPZ2         | 0.957570019 | 2.96E-05    |
| ENSG00000148481 | FAM188A       | 0.957577642 | 0.007310585 |
| ENSG00000099817 | POLR2E        | 0.957596249 | 0.031630858 |
| ENSG00000164896 | FASTK         | 0.957606204 | 6.72E-05    |
| ENSG00000182158 | CREB3L2       | 0.957619869 | 0.000925466 |

|                 |               |             |             |
|-----------------|---------------|-------------|-------------|
| ENSG00000125122 | LRRC29        | 0.957620998 | 0.004170522 |
| ENSG00000162227 | TAF6L         | 0.957625968 | 0.009616729 |
| ENSG00000078070 | MCCC1         | 0.957641225 | 0.012972053 |
| ENSG00000167680 | SEMA6B        | 0.957650682 | 0.025124495 |
| ENSG00000111361 | EIF2B1        | 0.957653715 | 0.002472898 |
| ENSG00000117533 | VAMP4         | 0.957655724 | 0.013257641 |
| ENSG00000166509 | CLEC3A        | 0.957659723 | 0.000869406 |
| ENSG00000269396 | AC187652.1    | 0.957665794 | 0.012121577 |
| ENSG00000113595 | TRIM23        | 0.957666674 | 0.008255353 |
| ENSG00000171282 | RP11-1055B8.7 | 0.957671743 | 0.044011573 |
| ENSG00000268344 | AL138815.2    | 0.957680601 | 0.006856319 |
| ENSG00000166311 | SMPD1         | 0.957705214 | 0.004557552 |
| ENSG00000133704 | IPO8          | 0.95773417  | 0.014055415 |
| ENSG00000074047 | GLI2          | 0.957736635 | 0.023972109 |
| ENSG00000143669 | LYST          | 0.957741641 | 0.020798636 |
| ENSG00000176463 | SLCO3A1       | 0.957786543 | 0.041222026 |
| ENSG00000198440 | ZNF583        | 0.957808357 | 0.024667568 |
| ENSG00000110025 | SNX15         | 0.957818976 | 0.017450728 |
| ENSG00000061492 | WNT8A         | 0.957851075 | 0.000797905 |
| ENSG00000133059 | DSTYK         | 0.957851937 | 0.000766106 |
| ENSG00000129347 | KRI1          | 0.957852477 | 0.004745053 |
| ENSG00000136457 | CHAD          | 0.95785774  | 0.008103113 |
| ENSG00000162076 | FLYWCH2       | 0.957868495 | 0.004546715 |
| ENSG00000119707 | RBM25         | 0.957869263 | 0.002631566 |
| ENSG00000121316 | PLBD1         | 0.957881982 | 0.002709607 |
| ENSG00000129219 | PLD2          | 0.957889566 | 0.03353126  |
| ENSG00000219481 | NBPF1         | 0.957898088 | 0.002520215 |
| ENSG00000187045 | TMPRSS6       | 0.957910544 | 0.00149111  |
| ENSG00000146457 | WTAP          | 0.957913837 | 0.021147446 |
| ENSG00000173163 | COMMD1        | 0.957980864 | 0.015879898 |
| ENSG00000119820 | YIPF4         | 0.957994893 | 0.002138746 |
| ENSG00000213760 | ATP6V1G2      | 0.95799811  | 0.02603735  |
| ENSG00000177889 | UBE2N         | 0.958001218 | 0.000382383 |
| ENSG00000156642 | NPTN          | 0.958005517 | 3.32E-05    |
| ENSG00000198898 | CAPZA2        | 0.958007767 | 0.007742813 |
| ENSG00000100813 | ACIN1         | 0.958008881 | 0.00404849  |
| ENSG00000058799 | YIPF1         | 0.958016671 | 0.025327102 |
| ENSG00000111275 | ALDH2         | 0.958018165 | 0.00562315  |
| ENSG00000174482 | LINGO2        | 0.958022327 | 0.00760656  |
| ENSG00000172830 | SSH3          | 0.958024244 | 0.008927793 |
| ENSG00000124782 | RREB1         | 0.95804109  | 0.00703647  |
| ENSG00000162592 | CCDC27        | 0.958049667 | 0.001574485 |
| ENSG00000105701 | FKBP8         | 0.958056022 | 0.02161528  |
| ENSG00000011201 | KAL1          | 0.958060159 | 0.039489691 |
| ENSG00000242498 | C15orf38      | 0.958101957 | 0.004668648 |
| ENSG00000175782 | SLC35E3       | 0.958107366 | 0.020230526 |
| ENSG00000147144 | CCDC120       | 0.958125602 | 0.000112169 |

|                 |           |             |             |
|-----------------|-----------|-------------|-------------|
| ENSG00000169282 | KCNAB1    | 0.958171397 | 0.000231102 |
| ENSG00000164938 | TP53INP1  | 0.958173589 | 7.26E-05    |
| ENSG00000184698 | OR51M1    | 0.9581752   | 0.011999459 |
| ENSG00000160471 | COX6B2    | 0.95818256  | 0.02725048  |
| ENSG00000198931 | APRT      | 0.958188535 | 0.027448542 |
| ENSG00000166148 | AVPR1A    | 0.958189491 | 0.037100295 |
| ENSG00000092330 | TINF2     | 0.958192836 | 0.008985699 |
| ENSG00000086159 | AQP6      | 0.958219333 | 0.002016171 |
| ENSG00000170819 | BFSP2     | 0.958222644 | 0.035521044 |
| ENSG00000165131 | C7orf34   | 0.958249393 | 0.001496984 |
| ENSG00000119599 | DCAF4     | 0.95825446  | 0.008880393 |
| ENSG00000005810 | MYCBP2    | 0.958264503 | 0.012864147 |
| ENSG00000119718 | EIF2B2    | 0.958264653 | 0.000763361 |
| ENSG00000152942 | RAD17     | 0.958278015 | 0.002847483 |
| ENSG00000124615 | MOCS1     | 0.958290425 | 0.001224816 |
| ENSG00000127124 | HIVEP3    | 0.958323769 | 0.000632464 |
| ENSG00000096996 | IL12RB1   | 0.958334223 | 0.040322089 |
| ENSG00000204851 | PNMAL2    | 0.95839952  | 0.003329907 |
| ENSG00000147647 | DPYS      | 0.958407477 | 0.00113743  |
| ENSG00000163814 | CDCP1     | 0.958438922 | 0.000650119 |
| ENSG00000165553 | NGB       | 0.958439922 | 0.030162015 |
| ENSG00000072694 | FCGR2B    | 0.958450197 | 0.006630588 |
| ENSG00000073711 | PPP2R3A   | 0.958474057 | 0.020323752 |
| ENSG00000107731 | UNC5B     | 0.958475174 | 0.015850325 |
| ENSG00000171790 | SLFNL1    | 0.958478574 | 0.000143041 |
| ENSG00000174407 | C20orf166 | 0.95850992  | 0.0092667   |
| ENSG00000188613 | NANOS1    | 0.958529404 | 0.005614876 |
| ENSG00000104154 | SLC30A4   | 0.958538339 | 0.035122933 |
| ENSG00000158486 | DNAH3     | 0.958548531 | 0.016580558 |
| ENSG00000196428 | TSC22D2   | 0.95855948  | 0.040183776 |
| ENSG00000074319 | TSG101    | 0.958564731 | 0.044336156 |
| ENSG00000173040 | EVC2      | 0.958580796 | 0.001699719 |
| ENSG00000162510 | MATN1     | 0.958604411 | 0.007896301 |
| ENSG00000125447 | GGA3      | 0.958678749 | 0.020251564 |
| ENSG00000186104 | CYP2R1    | 0.958679817 | 0.033108868 |
| ENSG00000196850 | PPTC7     | 0.958684556 | 7.81E-05    |
| ENSG00000119946 | CNNM1     | 0.958702045 | 0.003287762 |
| ENSG00000205030 | OR5L2     | 0.958716353 | 0.001456445 |
| ENSG00000211785 | TRAV12-1  | 0.958744863 | 0.004923471 |
| ENSG00000108474 | PIGL      | 0.958766365 | 0.011635484 |
| ENSG00000215440 | NPEPL1    | 0.958792051 | 0.02867474  |
| ENSG00000162542 | TMCO4     | 0.958813443 | 0.001225416 |
| ENSG00000103160 | HSDL1     | 0.958842407 | 0.006048602 |
| ENSG00000115993 | TRAK2     | 0.958853075 | 0.027371526 |
| ENSG00000101188 | NTSR1     | 0.958857785 | 0.021996384 |
| ENSG00000100242 | SUN2      | 0.958879843 | 0.009856672 |
| ENSG00000185917 | SETD4     | 0.958883067 | 0.000845986 |

|                 |           |             |             |
|-----------------|-----------|-------------|-------------|
| ENSG00000189283 | FHIT      | 0.958898212 | 0.04613251  |
| ENSG00000186951 | PPARA     | 0.958903659 | 0.012254036 |
| ENSG00000198719 | DLL1      | 0.958938863 | 0.035496359 |
| ENSG00000136709 | WDR33     | 0.958939207 | 0.028308658 |
| ENSG00000100650 | SRSF5     | 0.95896207  | 0.012376856 |
| ENSG00000197446 | CYP2F1    | 0.958965728 | 0.040356184 |
| ENSG00000099954 | CECR2     | 0.958975513 | 0.000148772 |
| ENSG00000130724 | CHMP2A    | 0.958995205 | 0.000836407 |
| ENSG00000076053 | RBM7      | 0.95904876  | 0.048466714 |
| ENSG00000198870 | C9orf96   | 0.959069248 | 0.012362863 |
| ENSG00000100154 | TTC28     | 0.959075498 | 0.049548555 |
| ENSG00000176619 | LMNB2     | 0.959075796 | 0.043390296 |
| ENSG00000023330 | ALAS1     | 0.95908952  | 0.02288678  |
| ENSG00000009780 | FAM76A    | 0.959104498 | 0.0369938   |
| ENSG00000157510 | AFAP1L1   | 0.959104726 | 0.01908422  |
| ENSG00000172232 | AZU1      | 0.959132605 | 0.024698085 |
| ENSG00000066739 | ATG2B     | 0.95913825  | 0.000435354 |
| ENSG00000173267 | SNCG      | 0.959143238 | 0.038461628 |
| ENSG00000120910 | PPP3CC    | 0.959149716 | 0.000627825 |
| ENSG00000070785 | EIF2B3    | 0.959162152 | 0.012349628 |
| ENSG00000204130 | RUFY2     | 0.95916875  | 0.000299257 |
| ENSG00000096092 | TMEM14A   | 0.95919263  | 0.014895838 |
| ENSG00000212724 | KRTAP2-3  | 0.959200803 | 0.002351752 |
| ENSG00000197063 | MAFG      | 0.959204471 | 0.016806306 |
| ENSG00000159495 | TGM7      | 0.959210198 | 0.034841463 |
| ENSG00000181781 | ODF3L2    | 0.959245276 | 0.005319354 |
| ENSG00000112425 | EPM2A     | 0.959248219 | 0.038791882 |
| ENSG00000159958 | TNFRSF13C | 0.959257083 | 0.01631528  |
| ENSG00000136936 | XPA       | 0.959267466 | 0.000968655 |
| ENSG00000114942 | EEF1B2    | 0.959275633 | 0.02405611  |
| ENSG00000140521 | POLG      | 0.959279449 | 0.007398129 |
| ENSG00000159479 | MED8      | 0.959280857 | 0.00557068  |
| ENSG00000139574 | NPFF      | 0.959290287 | 0.030294995 |
| ENSG00000009709 | PAX7      | 0.959293431 | 0.042240406 |
| ENSG00000120341 | SEC16B    | 0.959308663 | 0.002640329 |
| ENSG00000152315 | KCNK13    | 0.959326608 | 0.001788999 |
| ENSG00000179335 | CLK3      | 0.95932771  | 0.00238567  |
| ENSG00000188917 | TRMT2B    | 0.959335775 | 0.013221917 |
| ENSG00000122958 | VPS26A    | 0.95933667  | 0.003798233 |
| ENSG00000130595 | TNNT3     | 0.959366948 | 0.006014485 |
| ENSG00000101306 | MYLK2     | 0.959367096 | 0.003292234 |
| ENSG00000198925 | ATG9A     | 0.959376791 | 0.014069769 |
| ENSG00000182700 | IGIP      | 0.959389907 | 0.024057978 |
| ENSG00000189319 | FAM53B    | 0.959394609 | 0.043667471 |
| ENSG00000183484 | GPR132    | 0.959403179 | 0.046512539 |
| ENSG00000049768 | FOXP3     | 0.959418451 | 0.048876216 |
| ENSG00000084444 | KIAA1467  | 0.959425315 | 0.014285755 |

|                 |          |             |             |
|-----------------|----------|-------------|-------------|
| ENSG00000130772 | MED18    | 0.959426953 | 0.004423123 |
| ENSG00000109606 | DHX15    | 0.959437569 | 0.000640715 |
| ENSG00000185053 | SGCZ     | 0.95944028  | 0.001245922 |
| ENSG00000112293 | GPLD1    | 0.959458095 | 0.014348625 |
| ENSG00000139531 | SUOX     | 0.959485806 | 0.03036762  |
| ENSG00000177679 | SRRM3    | 0.959488882 | 0.000111876 |
| ENSG00000143858 | SYT2     | 0.959528964 | 0.013255821 |
| ENSG00000102271 | KLHL4    | 0.959534745 | 9.66E-05    |
| ENSG00000179002 | TAS1R2   | 0.959544947 | 0.002436352 |
| ENSG00000121210 | KIAA0922 | 0.959547275 | 0.049858086 |
| ENSG00000197901 | SLC22A6  | 0.959550745 | 0.014018272 |
| ENSG00000197616 | MYH6     | 0.959553349 | 0.004661922 |
| ENSG00000151276 | MAGI1    | 0.95955677  | 0.01567382  |
| ENSG00000165669 | FAM204A  | 0.95955877  | 0.039082203 |
| ENSG00000089220 | PEBP1    | 0.959568324 | 0.001085973 |
| ENSG00000060749 | QSER1    | 0.959578231 | 0.007853711 |
| ENSG00000100346 | CACNA1I  | 0.959584537 | 0.035595057 |
| ENSG00000155545 | MIER3    | 0.959586386 | 0.00438332  |
| ENSG00000173464 | RNASE11  | 0.959589199 | 0.000150456 |
| ENSG00000133597 | ADCK2    | 0.959606308 | 0.034689903 |
| ENSG00000174306 | ZHX3     | 0.959612596 | 0.02698456  |
| ENSG00000064666 | CNN2     | 0.959628608 | 0.043396463 |
| ENSG00000132000 | PODNL1   | 0.959649136 | 0.012056533 |
| ENSG00000089169 | RPH3A    | 0.95964942  | 0.000771814 |
| ENSG00000164252 | AGGF1    | 0.959654856 | 0.000393147 |
| ENSG00000118245 | TNP1     | 0.959682248 | 0.006317271 |
| ENSG00000183751 | TBL3     | 0.959706894 | 0.015074254 |
| ENSG00000100299 | ARSA     | 0.959730514 | 0.049345091 |
| ENSG00000100804 | PSMB5    | 0.959762277 | 0.006866738 |
| ENSG00000180098 | TRNAU1AP | 0.959776989 | 0.002297761 |
| ENSG00000171551 | ECEL1    | 0.959781047 | 0.040417322 |
| ENSG00000141013 | GAS8     | 0.959792741 | 0.020827539 |
| ENSG00000101074 | R3HDML   | 0.959802218 | 0.001656133 |
| ENSG00000136504 | KAT7     | 0.9598254   | 0.012927497 |
| ENSG00000158077 | NLRP14   | 0.959848379 | 0.013059234 |
| ENSG00000177380 | PPFIA3   | 0.959862172 | 0.016811961 |
| ENSG00000206181 | TCEB3B   | 0.959887143 | 0.005997613 |
| ENSG00000163273 | NPPC     | 0.959887774 | 0.016588104 |
| ENSG00000126822 | PLEKHG3  | 0.959891554 | 0.00012203  |
| ENSG00000161992 | C16orf11 | 0.959893313 | 0.00225169  |
| ENSG00000100246 | DNAL4    | 0.959903547 | 0.008708679 |
| ENSG00000059145 | UNKL     | 0.959906002 | 0.039212079 |
| ENSG00000105568 | PPP2R1A  | 0.959913503 | 0.003204897 |
| ENSG00000187605 | TET3     | 0.959940124 | 0.000179606 |
| ENSG00000197077 | KIAA1671 | 0.959952772 | 8.14E-05    |
| ENSG00000109332 | UBE2D3   | 0.95995475  | 0.021423123 |
| ENSG00000131446 | MGAT1    | 0.959956357 | 0.019150907 |

|                 |               |             |             |
|-----------------|---------------|-------------|-------------|
| ENSG00000119328 | FAM206A       | 0.959956398 | 0.000327391 |
| ENSG00000176383 | B3GNT4        | 0.959975044 | 0.001187627 |
| ENSG00000102001 | CACNA1F       | 0.959975179 | 0.021246785 |
| ENSG00000100055 | CYTH4         | 0.95998777  | 0.045335974 |
| ENSG00000165887 | ANKRD2        | 0.959991396 | 0.013810181 |
| ENSG00000113492 | AGXT2         | 0.960005196 | 0.022792051 |
| ENSG00000185559 | DLK1          | 0.960015455 | 0.01872151  |
| ENSG00000145860 | RNF145        | 0.960017681 | 0.018461035 |
| ENSG00000188315 | C3orf62       | 0.960025792 | 0.005979296 |
| ENSG00000143761 | ARF1          | 0.960057973 | 0.000358441 |
| ENSG00000216921 | AC131097.4    | 0.960096289 | 0.032701262 |
| ENSG00000163900 | TMEM41A       | 0.960096355 | 0.012099066 |
| ENSG00000124194 | GDAP1L1       | 0.960102993 | 0.046878359 |
| ENSG00000184908 | CLCNKB        | 0.9601252   | 0.020994809 |
| ENSG00000116350 | SRSF4         | 0.960140213 | 0.000401837 |
| ENSG00000250733 | C8orf17       | 0.960148624 | 0.043682703 |
| ENSG00000173809 | TDRD12        | 0.960190401 | 0.027056797 |
| ENSG00000169057 | MECP2         | 0.960208238 | 0.033013177 |
| ENSG00000141644 | MBD1          | 0.960213155 | 0.000722428 |
| ENSG00000166619 | BLCAP         | 0.960217967 | 0.012902289 |
| ENSG00000071127 | WDR1          | 0.960218129 | 0.029142148 |
| ENSG00000114982 | KANSL3        | 0.960225711 | 0.032002692 |
| ENSG00000211452 | DIO1          | 0.96022709  | 0.04912639  |
| ENSG00000118702 | GHRH          | 0.960228687 | 0.027965894 |
| ENSG00000178498 | DTX3          | 0.960229717 | 0.0156433   |
| ENSG00000014123 | UFL1          | 0.960257683 | 0.017574206 |
| ENSG00000046647 | GEMIN8        | 0.960260907 | 0.031670552 |
| ENSG00000174326 | SLC16A11      | 0.960264893 | 0.028967762 |
| ENSG00000107957 | SH3PXD2A      | 0.960281623 | 8.88E-06    |
| ENSG00000159267 | HLCS          | 0.960305925 | 0.002346412 |
| ENSG00000173960 | UBXN2A        | 0.960317989 | 0.029721295 |
| ENSG00000140795 | MYLK3         | 0.960332311 | 0.011955904 |
| ENSG00000189433 | GJB4          | 0.960334994 | 0.028886386 |
| ENSG00000128463 | EMC4          | 0.960341778 | 0.003948267 |
| ENSG00000109424 | UCP1          | 0.960352094 | 0.024145322 |
| ENSG00000169714 | CNBP          | 0.960357439 | 0.00026527  |
| ENSG00000107447 | DNTT          | 0.960358798 | 7.31E-05    |
| ENSG00000174473 | GALNTL6       | 0.960368861 | 0.046499634 |
| ENSG00000248905 | FMN1          | 0.960381624 | 0.005973142 |
| ENSG00000166024 | R3HCC1L       | 0.960382839 | 0.014540806 |
| ENSG00000138439 | FAM117B       | 0.960396029 | 0.00627726  |
| ENSG00000108010 | GLRX3         | 0.960404411 | 0.004220447 |
| ENSG00000129355 | CDKN2D        | 0.960406552 | 0.042252434 |
| ENSG00000178636 | RP11-455G16.1 | 0.960406585 | 0.016337014 |
| ENSG00000116273 | PHF13         | 0.960439606 | 0.004296027 |
| ENSG00000176984 | AP000679.2    | 0.960451358 | 0.028069406 |
| ENSG00000053438 | NNAT          | 0.960452991 | 0.008920185 |

|                 |          |             |             |
|-----------------|----------|-------------|-------------|
| ENSG00000128285 | MCHR1    | 0.960464916 | 3.85E-05    |
| ENSG00000204305 | AGER     | 0.960475499 | 0.003866411 |
| ENSG00000163466 | ARPC2    | 0.960476745 | 0.007484559 |
| ENSG00000197646 | PDCD1LG2 | 0.960539173 | 6.22E-05    |
| ENSG00000181873 | IBA57    | 0.960547825 | 0.024958154 |
| ENSG00000116176 | TPSG1    | 0.96054887  | 0.046390081 |
| ENSG00000129933 | MAU2     | 0.960549221 | 0.006715702 |
| ENSG00000164305 | CASP3    | 0.960578221 | 0.017384284 |
| ENSG00000250571 | GLI4     | 0.960578714 | 0.005306743 |
| ENSG00000105954 | NPVF     | 0.960579714 | 0.043945572 |
| ENSG00000162631 | NTNG1    | 0.960581025 | 0.005445171 |
| ENSG00000197540 | GZMM     | 0.960594189 | 0.017979685 |
| ENSG00000115365 | LANCL1   | 0.960600458 | 0.009536581 |
| ENSG00000143772 | ITPKB    | 0.960600965 | 0.000466184 |
| ENSG00000125834 | STK35    | 0.960602966 | 1.86E-05    |
| ENSG00000164265 | SCGB3A2  | 0.960603531 | 0.0096287   |
| ENSG00000159588 | CCDC17   | 0.960615203 | 0.006260554 |
| ENSG00000198488 | B3GNT6   | 0.96063681  | 0.020813063 |
| ENSG00000167113 | COQ4     | 0.960650054 | 0.018584152 |
| ENSG00000186790 | FOXE3    | 0.96067899  | 0.043627786 |
| ENSG00000104388 | RAB2A    | 0.960688247 | 0.001893709 |
| ENSG00000154957 | ZNF18    | 0.96071385  | 0.02622957  |
| ENSG00000104866 | PPP1R37  | 0.960727301 | 0.027657747 |
| ENSG00000131508 | UBE2D2   | 0.960732509 | 0.000772893 |
| ENSG00000204193 | TXNDC8   | 0.960756453 | 0.000701497 |
| ENSG00000036530 | CYP46A1  | 0.960764674 | 0.021256745 |
| ENSG00000113558 | SKP1     | 0.960790493 | 0.02886068  |
| ENSG00000104904 | OAZ1     | 0.960792382 | 0.000217732 |
| ENSG00000099864 | PALM     | 0.960798693 | 0.001398505 |
| ENSG00000131849 | ZNF132   | 0.96080372  | 0.024250833 |
| ENSG00000175073 | VCPIP1   | 0.960832407 | 0.031278681 |
| ENSG00000165495 | PKNOX2   | 0.960840281 | 0.004608367 |
| ENSG00000170271 | FAXDC2   | 0.960863372 | 0.002549734 |
| ENSG00000039123 | SKIV2L2  | 0.960876799 | 0.012438345 |
| ENSG00000015133 | CCDC88C  | 0.960883999 | 0.037674977 |
| ENSG00000251369 | ZNF550   | 0.960887466 | 0.01782997  |
| ENSG00000204304 | PBX2     | 0.960905592 | 5.10E-05    |
| ENSG00000101916 | TLR8     | 0.960917876 | 0.043460929 |
| ENSG00000148384 | INPP5E   | 0.960920579 | 0.021984403 |
| ENSG00000139187 | KLRG1    | 0.960938702 | 0.028544484 |
| ENSG00000171357 | LURAP1   | 0.960939737 | 0.002260771 |
| ENSG00000183726 | TMEM50A  | 0.960946673 | 0.00077944  |
| ENSG00000183780 | SLC35F3  | 0.960949136 | 0.010895704 |
| ENSG00000196811 | CHRNA    | 0.960961543 | 0.016995141 |
| ENSG00000143178 | TBX19    | 0.960966035 | 0.0190451   |
| ENSG00000123600 | METTL8   | 0.960973076 | 0.008897541 |
| ENSG00000139190 | VAMP1    | 0.960973541 | 0.013302682 |

|                 |          |             |             |
|-----------------|----------|-------------|-------------|
| ENSG00000100485 | SOS2     | 0.961018684 | 0.002760815 |
| ENSG00000124788 | ATXN1    | 0.961034588 | 0.040238725 |
| ENSG00000100614 | PPM1A    | 0.961054862 | 0.047842214 |
| ENSG00000161692 | DBF4B    | 0.96113258  | 0.000772315 |
| ENSG00000229972 | IQCF3    | 0.961181116 | 0.000727995 |
| ENSG00000099810 | MTAP     | 0.961189014 | 0.00407979  |
| ENSG00000007516 | BAIAP3   | 0.961212565 | 0.045619333 |
| ENSG00000101844 | ATG4A    | 0.961221213 | 0.005329403 |
| ENSG00000091592 | NLRP1    | 0.961240823 | 0.03062446  |
| ENSG00000156475 | PPP2R2B  | 0.961244657 | 0.001679917 |
| ENSG00000118972 | FGF23    | 0.961251253 | 0.003468311 |
| ENSG00000147124 | ZNF41    | 0.961302994 | 0.035989793 |
| ENSG00000116106 | EPHA4    | 0.961303514 | 0.010361747 |
| ENSG00000167447 | SMG8     | 0.96130483  | 0.047443375 |
| ENSG00000187240 | DYNC2H1  | 0.9613085   | 0.005003541 |
| ENSG00000188784 | PLA2G2E  | 0.961323581 | 0.02879096  |
| ENSG00000081148 | IMPG2    | 0.961332661 | 0.03089304  |
| ENSG00000171722 | C1orf111 | 0.961337784 | 0.022480316 |
| ENSG00000090316 | MAEA     | 0.961345168 | 0.008131371 |
| ENSG00000006695 | COX10    | 0.961365826 | 0.009344443 |
| ENSG00000007341 | ST7L     | 0.961382354 | 0.010074835 |
| ENSG00000117528 | ABCD3    | 0.961407932 | 0.016453561 |
| ENSG00000086598 | TMED2    | 0.961410873 | 0.039621401 |
| ENSG00000135766 | EGLN1    | 0.961413142 | 0.009846283 |
| ENSG00000121406 | ZNF549   | 0.961426904 | 0.002752211 |
| ENSG00000120051 | CCDC147  | 0.961428039 | 6.65E-05    |
| ENSG00000206561 | COLQ     | 0.96142858  | 0.048934885 |
| ENSG00000171596 | NMUR1    | 0.96146957  | 0.04848825  |
| ENSG00000164512 | ANKRD55  | 0.961480741 | 0.029148568 |
| ENSG00000142538 | PTH2     | 0.961494873 | 0.000934717 |
| ENSG00000126581 | BECN1    | 0.961497145 | 0.033914017 |
| ENSG00000140320 | BAHD1    | 0.961523389 | 0.023152725 |
| ENSG00000107643 | MAPK8    | 0.961524234 | 0.025823268 |
| ENSG00000124356 | STAMPB   | 0.961534925 | 0.001481731 |
| ENSG00000136805 | FRRS1L   | 0.961544101 | 0.002811517 |
| ENSG00000221826 | PSG3     | 0.961554912 | 0.000586646 |
| ENSG00000145832 | SLC25A48 | 0.961560072 | 0.001210298 |
| ENSG00000172150 | OR1A2    | 0.961566903 | 0.043402248 |
| ENSG00000214114 | MYCBP    | 0.96157589  | 0.003155031 |
| ENSG00000168778 | TCTN2    | 0.961581445 | 0.006092219 |
| ENSG00000066135 | KDM4A    | 0.96158449  | 0.002413032 |
| ENSG00000132975 | GPR12    | 0.961587157 | 0.002016437 |
| ENSG00000141096 | DPEP3    | 0.961596518 | 0.00617836  |
| ENSG00000197562 | RAB40C   | 0.961601175 | 0.044359    |
| ENSG00000182348 | ZNF804B  | 0.961603883 | 0.003456863 |
| ENSG00000144589 | STK11IP  | 0.961612191 | 0.017137862 |
| ENSG00000033030 | ZCCHC8   | 0.961633346 | 0.009472973 |

|                 |          |             |             |
|-----------------|----------|-------------|-------------|
| ENSG00000147896 | IFNK     | 0.961638668 | 0.000806521 |
| ENSG00000141161 | UNC45B   | 0.961639393 | 0.028454161 |
| ENSG00000103091 | WDR59    | 0.961646744 | 0.008116647 |
| ENSG00000203663 | OR2L2    | 0.961655451 | 0.012023703 |
| ENSG00000162374 | ELAVL4   | 0.961686785 | 0.000787075 |
| ENSG00000126262 | FFAR2    | 0.961724502 | 0.021874652 |
| ENSG00000163464 | CXCR1    | 0.961735524 | 0.001015597 |
| ENSG00000130590 | SAMD10   | 0.961753632 | 0.000495866 |
| ENSG00000154133 | ROBO4    | 0.961774497 | 0.028217282 |
| ENSG00000196220 | SRGAP3   | 0.961780868 | 0.016304318 |
| ENSG00000136720 | HS6ST1   | 0.961803056 | 0.026325932 |
| ENSG00000179242 | CDH4     | 0.961803087 | 0.036215193 |
| ENSG00000100341 | PNPLA5   | 0.961806752 | 0.01702431  |
| ENSG00000010244 | ZNF207   | 0.961838474 | 0.037093603 |
| ENSG00000214872 | SMTNL1   | 0.961850394 | 0.005442853 |
| ENSG00000080644 | CHRNA3   | 0.961853905 | 1.30E-05    |
| ENSG00000080802 | CNOT4    | 0.961879694 | 1.55E-05    |
| ENSG00000146416 | AIG1     | 0.961888768 | 0.014376214 |
| ENSG00000187323 | DCC      | 0.96189296  | 0.012895128 |
| ENSG00000173627 | APOBEC4  | 0.961899339 | 0.000239756 |
| ENSG00000134987 | WDR36    | 0.961900947 | 0.041521693 |
| ENSG00000142698 | C1orf94  | 0.96194995  | 0.010768231 |
| ENSG00000165633 | VSTM4    | 0.961956934 | 0.000450752 |
| ENSG00000167695 | FAM57A   | 0.961961876 | 0.031522231 |
| ENSG00000169884 | WNT10B   | 0.962015244 | 0.009655158 |
| ENSG00000127318 | IL22     | 0.962032079 | 0.024990374 |
| ENSG00000171403 | KRT9     | 0.96204502  | 0.042399142 |
| ENSG00000179133 | C10orf67 | 0.962045738 | 0.00030125  |
| ENSG00000184349 | EFNA5    | 0.962074045 | 0.027162252 |
| ENSG00000131467 | PSME3    | 0.962088168 | 0.045369798 |
| ENSG00000135974 | C2orf49  | 0.962090529 | 0.036766576 |
| ENSG00000188379 | IFNA2    | 0.962091661 | 0.021937437 |
| ENSG00000168412 | MTNR1A   | 0.962100373 | 0.010283875 |
| ENSG00000151577 | DRD3     | 0.962113499 | 0.039149747 |
| ENSG00000163958 | ZDHHC19  | 0.962127965 | 0.000263796 |
| ENSG00000092531 | SNAP23   | 0.962135187 | 0.009366918 |
| ENSG00000089116 | LHX5     | 0.962138138 | 0.028038182 |
| ENSG00000137868 | STRA6    | 0.962146847 | 0.043814307 |
| ENSG00000006283 | CACNA1G  | 0.962154356 | 0.038566662 |
| ENSG00000036054 | TBC1D23  | 0.962195614 | 0.033205011 |
| ENSG00000130066 | SAT1     | 0.962198938 | 0.000622798 |
| ENSG00000004838 | ZMYND10  | 0.962221999 | 0.036021741 |
| ENSG00000064932 | SBNO2    | 0.962226651 | 0.014741904 |
| ENSG00000156050 | FAM161B  | 0.962227851 | 0.016536042 |
| ENSG00000215644 | GCGR     | 0.962235387 | 0.011850389 |
| ENSG00000181027 | FKRP     | 0.96224794  | 0.025255064 |
| ENSG00000141540 | TTYH2    | 0.962287304 | 0.005633205 |

|                 |          |             |             |
|-----------------|----------|-------------|-------------|
| ENSG00000178662 | CSRNP3   | 0.962313635 | 0.000182293 |
| ENSG00000166743 | ACSM1    | 0.962317525 | 0.013704669 |
| ENSG00000119912 | IDE      | 0.962332013 | 0.035662708 |
| ENSG00000100226 | GTPBP1   | 0.962359847 | 0.005391012 |
| ENSG00000079785 | DDX1     | 0.962376768 | 0.00278038  |
| ENSG00000213533 | TMEM110  | 0.962390563 | 0.000388975 |
| ENSG00000136715 | SAP130   | 0.962392523 | 0.005663981 |
| ENSG00000148200 | NR6A1    | 0.962397302 | 0.00204834  |
| ENSG00000164850 | GPBR1    | 0.962398387 | 0.026527539 |
| ENSG00000140623 | 12-Sep   | 0.962410937 | 0.017236482 |
| ENSG00000186628 | FSD2     | 0.962412006 | 0.004630339 |
| ENSG00000163870 | TPRA1    | 0.962431973 | 0.009787864 |
| ENSG00000011243 | AKAP8L   | 0.962432186 | 0.027683653 |
| ENSG00000178243 | C9orf62  | 0.962449666 | 0.017413256 |
| ENSG00000067064 | IDI1     | 0.962450605 | 0.027127712 |
| ENSG00000118557 | PMFBP1   | 0.962453605 | 0.037089462 |
| ENSG00000160445 | ZER1     | 0.962459156 | 0.019088548 |
| ENSG00000143774 | GUK1     | 0.962459861 | 0.046235926 |
| ENSG00000220205 | VAMP2    | 0.962460348 | 0.032750245 |
| ENSG00000123104 | ITPR2    | 0.96247915  | 0.012731188 |
| ENSG00000128604 | IRF5     | 0.962479391 | 0.002150849 |
| ENSG00000138650 | PCDH10   | 0.962481408 | 0.004281339 |
| ENSG00000140750 | ARHGAP17 | 0.96250231  | 0.002221541 |
| ENSG00000077380 | DYNC112  | 0.962510632 | 0.000112453 |
| ENSG00000145040 | UCN2     | 0.962513852 | 0.044595713 |
| ENSG00000084674 | APOB     | 0.96251715  | 0.009456949 |
| ENSG00000184344 | GDF3     | 0.962519346 | 0.016607809 |
| ENSG00000075891 | PAX2     | 0.962536626 | 0.025461033 |
| ENSG00000147613 | PSKH2    | 0.962540866 | 0.001991572 |
| ENSG00000169499 | PLEKHA2  | 0.962545057 | 0.028752392 |
| ENSG00000120094 | HOXB1    | 0.962554392 | 0.004509025 |
| ENSG00000215712 | TMEM242  | 0.962574796 | 0.000481757 |
| ENSG00000102543 | CDADC1   | 0.962596601 | 0.006295841 |
| ENSG00000035115 | SH3YL1   | 0.96260512  | 0.030267117 |
| ENSG00000131165 | CHMP1A   | 0.962631346 | 0.023508847 |
| ENSG00000155287 | SLC25A28 | 0.962660608 | 0.005690276 |
| ENSG00000006659 | LGALS14  | 0.96267947  | 0.033717116 |
| ENSG00000086065 | CHMP5    | 0.962681728 | 0.004425124 |
| ENSG00000055211 | GINM1    | 0.962683556 | 0.023032942 |
| ENSG00000113300 | CNOT6    | 0.962705909 | 0.002710994 |
| ENSG00000171595 | DNAI2    | 0.962732264 | 0.019888625 |
| ENSG00000125835 | SNRPB    | 0.962743073 | 0.014790047 |
| ENSG00000174562 | KLK15    | 0.96274628  | 0.001345887 |
| ENSG00000143258 | USP21    | 0.962759812 | 0.029193462 |
| ENSG00000119778 | ATAD2B   | 0.962768427 | 0.001239073 |
| ENSG00000198695 | MT-ND6   | 0.962780602 | 0.019015651 |
| ENSG00000163866 | SMIM12   | 0.962781112 | 0.004894492 |

|                 |          |             |             |
|-----------------|----------|-------------|-------------|
| ENSG00000112232 | KHDRBS2  | 0.962783347 | 0.029619993 |
| ENSG00000163029 | SMC6     | 0.962785168 | 0.030149024 |
| ENSG00000160801 | PTH1R    | 0.962785587 | 0.044337255 |
| ENSG00000171161 | ZNF672   | 0.962788364 | 8.25E-05    |
| ENSG00000196184 | OR10J1   | 0.962788388 | 0.001821867 |
| ENSG00000204084 | INPP5B   | 0.962816345 | 0.005483136 |
| ENSG00000198689 | SLC9A6   | 0.962820342 | 0.021665273 |
| ENSG00000105088 | OLFM2    | 0.962854414 | 0.002323188 |
| ENSG00000178279 | TNP2     | 0.962857057 | 0.014707118 |
| ENSG00000132563 | REEP2    | 0.962858946 | 0.021443935 |
| ENSG00000184857 | TMEM186  | 0.962859709 | 0.009335646 |
| ENSG00000130383 | FUT5     | 0.962869241 | 0.012554788 |
| ENSG00000182132 | KCNIP1   | 0.962871219 | 0.018796236 |
| ENSG00000117305 | HMGCL    | 0.962878251 | 0.005452766 |
| ENSG00000148156 | ACTL7B   | 0.962894442 | 0.038728924 |
| ENSG00000129559 | NEDD8    | 0.962897957 | 0.000109123 |
| ENSG00000113734 | BNIP1    | 0.962906258 | 0.031653314 |
| ENSG00000150086 | GRIN2B   | 0.962915301 | 0.038767957 |
| ENSG00000130717 | UCK1     | 0.962929978 | 5.85E-05    |
| ENSG00000102572 | STK24    | 0.962930795 | 0.036975446 |
| ENSG00000066422 | ZBTB11   | 0.962933485 | 0.002296351 |
| ENSG00000009844 | VTA1     | 0.962955684 | 0.023918407 |
| ENSG00000102796 | DHRS12   | 0.962965171 | 0.016558644 |
| ENSG00000164076 | CAMKV    | 0.962982969 | 0.031344119 |
| ENSG00000090432 | MUL1     | 0.962991003 | 0.01511449  |
| ENSG00000221852 | KRTAP1-5 | 0.96299438  | 0.008404718 |
| ENSG00000179151 | EDC3     | 0.963009983 | 0.002077583 |
| ENSG00000163497 | FEV      | 0.963010026 | 0.031683082 |
| ENSG00000198218 | QRICH1   | 0.963022298 | 0.007688791 |
| ENSG00000066827 | ZFAT     | 0.963033612 | 0.005197325 |
| ENSG00000198010 | DLGAP2   | 0.96304855  | 0.031745796 |
| ENSG00000197122 | SRC      | 0.963055674 | 0.00394094  |
| ENSG00000001461 | NIPAL3   | 0.96307244  | 0.001988843 |
| ENSG00000128254 | C22orf24 | 0.963075528 | 0.011414112 |
| ENSG00000128313 | APOL5    | 0.963090773 | 0.049795379 |
| ENSG00000119414 | PPP6C    | 0.963091754 | 0.022518527 |
| ENSG00000111737 | RAB35    | 0.963097261 | 0.009570243 |
| ENSG00000164535 | DAGLB    | 0.963103819 | 0.009136931 |
| ENSG00000181991 | MRPS11   | 0.963148357 | 0.048702944 |
| ENSG00000111229 | ARPC3    | 0.963150018 | 0.001817725 |
| ENSG00000073150 | PANX2    | 0.963151743 | 0.000133977 |
| ENSG00000105392 | CRX      | 0.963162679 | 0.026012203 |
| ENSG00000087258 | GNAO1    | 0.963163476 | 0.01939322  |
| ENSG00000156976 | EIF4A2   | 0.963175355 | 5.99E-05    |
| ENSG00000154920 | EME1     | 0.963178088 | 0.013176648 |
| ENSG00000147536 | GINS4    | 0.963188329 | 0.01238279  |
| ENSG00000139880 | CDH24    | 0.963220802 | 0.00044867  |

|                 |            |             |             |
|-----------------|------------|-------------|-------------|
| ENSG00000137070 | IL11RA     | 0.963225782 | 0.003645051 |
| ENSG00000162591 | MEGF6      | 0.96323944  | 0.011475445 |
| ENSG00000090539 | CHRD       | 0.963240129 | 0.034889649 |
| ENSG00000176293 | ZNF135     | 0.963256827 | 0.033723108 |
| ENSG00000078898 | BPIFB2     | 0.963259635 | 0.011664345 |
| ENSG00000164088 | PPM1M      | 0.963286284 | 0.040736226 |
| ENSG00000187134 | AKR1C1     | 0.963292447 | 0.001203934 |
| ENSG00000139445 | FOXN4      | 0.963292613 | 0.00273459  |
| ENSG00000269117 | AL121901.1 | 0.963310279 | 0.004397725 |
| ENSG00000170486 | KRT72      | 0.96331625  | 0.007995836 |
| ENSG00000100344 | PNPLA3     | 0.963321438 | 0.039056188 |
| ENSG00000196345 | ZKSCAN7    | 0.963330143 | 0.011452224 |
| ENSG00000131100 | ATP6V1E1   | 0.963338154 | 0.004361216 |
| ENSG00000170484 | KRT74      | 0.96334526  | 0.00020793  |
| ENSG00000135828 | RNASEL     | 0.963350257 | 0.00850443  |
| ENSG00000188419 | CHM        | 0.963358698 | 0.004423601 |
| ENSG00000197912 | SPG7       | 0.963366653 | 0.033360463 |
| ENSG00000065054 | SLC9A3R2   | 0.963408366 | 0.047648948 |
| ENSG00000118160 | SLC8A2     | 0.963410676 | 0.029414338 |
| ENSG00000157330 | C1orf158   | 0.963445047 | 0.038963781 |
| ENSG00000037757 | MRI1       | 0.963470854 | 0.042796943 |
| ENSG00000077080 | ACTL6B     | 0.963474154 | 0.03554677  |
| ENSG00000135250 | SRPK2      | 0.96347576  | 0.001665122 |
| ENSG00000144451 | SPAG16     | 0.963488513 | 0.002380857 |
| ENSG00000110448 | CD5        | 0.963488649 | 0.024380392 |
| ENSG00000008513 | ST3GAL1    | 0.963496724 | 0.042671471 |
| ENSG00000068745 | IP6K2      | 0.963539207 | 0.013792008 |
| ENSG00000141232 | TOB1       | 0.96354899  | 0.020280924 |
| ENSG00000242732 | RGAG4      | 0.96362964  | 0.01459125  |
| ENSG00000269223 | AL158091.1 | 0.963636115 | 0.002179153 |
| ENSG00000140829 | DHX38      | 0.963645256 | 0.002928999 |
| ENSG00000183048 | SLC25A10   | 0.963651067 | 0.014736372 |
| ENSG00000186049 | KRT73      | 0.963661137 | 0.001345575 |
| ENSG00000166848 | TERF2IP    | 0.963663858 | 0.02629269  |
| ENSG00000128346 | C22orf23   | 0.963692718 | 0.007520028 |
| ENSG00000079332 | SAR1A      | 0.963706605 | 0.027960698 |
| ENSG00000100227 | POLDIP3    | 0.963710235 | 0.005995455 |
| ENSG00000055070 | SZRD1      | 0.963735988 | 0.00063938  |
| ENSG00000165972 | CCDC38     | 0.963743854 | 0.034893481 |
| ENSG00000181408 | UTS2R      | 0.963761847 | 0.008049975 |
| ENSG00000127527 | EPS15L1    | 0.963769144 | 0.042313924 |
| ENSG00000131507 | NDFIP1     | 0.963773589 | 0.003294347 |
| ENSG00000162409 | PRKAA2     | 0.963784833 | 0.013736456 |
| ENSG00000185811 | IKZF1      | 0.963808519 | 0.015173233 |
| ENSG00000157540 | DYRK1A     | 0.963815759 | 0.001158939 |
| ENSG00000081307 | UBA5       | 0.963821706 | 0.026313521 |
| ENSG00000090659 | CD209      | 0.963821873 | 0.038749683 |

|                 |          |             |             |
|-----------------|----------|-------------|-------------|
| ENSG00000170325 | PRDM10   | 0.96386085  | 0.011653386 |
| ENSG00000140873 | ADAMTS18 | 0.963885224 | 0.000983499 |
| ENSG00000186160 | CYP4Z1   | 0.963890872 | 0.021843157 |
| ENSG00000173389 | IQCF1    | 0.963893472 | 0.011388373 |
| ENSG00000167139 | TBC1D21  | 0.963903432 | 0.011758534 |
| ENSG00000101365 | IDH3B    | 0.963908249 | 0.009163031 |
| ENSG00000163357 | DCST1    | 0.963925043 | 0.041243398 |
| ENSG00000178233 | TMEM151B | 0.963928865 | 0.046893279 |
| ENSG00000149201 | CCDC81   | 0.963930034 | 0.028446532 |
| ENSG00000009724 | MASP2    | 0.963936535 | 0.027403601 |
| ENSG00000179115 | FARSA    | 0.963943782 | 0.038544233 |
| ENSG00000104313 | EYA1     | 0.963952893 | 0.035977208 |
| ENSG00000102683 | SGCG     | 0.963965766 | 0.032884202 |
| ENSG00000153575 | TUBGCP5  | 0.963967277 | 0.032468801 |
| ENSG00000131558 | EXOC4    | 0.963975036 | 0.000308821 |
| ENSG00000042813 | ZPBP     | 0.963993887 | 0.023938302 |
| ENSG00000185122 | HSF1     | 0.964027703 | 0.047701386 |
| ENSG00000156304 | SCAF4    | 0.96403501  | 0.016502288 |
| ENSG00000173068 | BNC2     | 0.964038101 | 0.017211769 |
| ENSG00000124762 | CDKN1A   | 0.964045955 | 0.034141013 |
| ENSG00000167264 | DUS2     | 0.964049918 | 0.001256283 |
| ENSG00000178802 | MPI      | 0.96405197  | 0.031412884 |
| ENSG00000165509 | MAGEC3   | 0.96406549  | 0.000868352 |
| ENSG00000168484 | SFTPC    | 0.964092488 | 0.020426705 |
| ENSG00000099814 | CEP170B  | 0.964104344 | 0.001030252 |
| ENSG00000113269 | RNF130   | 0.96410576  | 0.021528264 |
| ENSG00000116731 | PRDM2    | 0.964127194 | 0.000698211 |
| ENSG00000122126 | OCRL     | 0.964130433 | 0.004192743 |
| ENSG00000167208 | SNX20    | 0.96416158  | 0.009211734 |
| ENSG00000237515 | SHISA9   | 0.964164183 | 0.015339282 |
| ENSG00000178015 | GPR150   | 0.964177189 | 0.024757253 |
| ENSG00000143337 | TOR1AIP1 | 0.964186316 | 0.02714906  |
| ENSG00000135045 | C9orf40  | 0.964194235 | 0.028749257 |
| ENSG00000160223 | ICOSLG   | 0.964201523 | 0.000142047 |
| ENSG00000196565 | HBG2     | 0.964207773 | 0.024914097 |
| ENSG00000167863 | ATP5H    | 0.964220937 | 0.008005352 |
| ENSG00000120088 | CRHR1    | 0.964227365 | 0.026909106 |
| ENSG00000158470 | B4GALT5  | 0.964228345 | 0.019024417 |
| ENSG00000189068 | VSTM1    | 0.964271968 | 0.010665021 |
| ENSG00000204614 | TRIM40   | 0.964277492 | 0.009161008 |
| ENSG00000119772 | DNMT3A   | 0.964296559 | 0.029417786 |
| ENSG00000135945 | REV1     | 0.964314587 | 0.010024464 |
| ENSG00000168334 | XIRP1    | 0.96432023  | 0.023932949 |
| ENSG00000111276 | CDKN1B   | 0.964339616 | 0.040112401 |
| ENSG00000152208 | GRID2    | 0.964346127 | 0.04343017  |
| ENSG00000125815 | CST8     | 0.964353664 | 0.00764401  |
| ENSG00000157168 | NRG1     | 0.964363356 | 0.043549367 |

|                 |               |             |             |
|-----------------|---------------|-------------|-------------|
| ENSG00000143515 | ATP8B2        | 0.964376171 | 0.037881292 |
| ENSG00000196169 | KIF19         | 0.964389033 | 0.008411011 |
| ENSG00000180660 | MAB21L1       | 0.964394031 | 0.029709743 |
| ENSG00000257108 | NHLRC4        | 0.964394613 | 0.001301313 |
| ENSG00000213215 | OR2F1         | 0.964396282 | 0.046768839 |
| ENSG00000170782 | OR10A4        | 0.964418884 | 0.021374614 |
| ENSG00000068137 | PLEKHH3       | 0.964435454 | 0.000235076 |
| ENSG00000140854 | KATNB1        | 0.964440427 | 0.047238338 |
| ENSG00000184675 | AMER1         | 0.964455925 | 0.043584112 |
| ENSG00000171872 | KLF17         | 0.964458943 | 0.020457069 |
| ENSG00000163462 | TRIM46        | 0.96446106  | 0.033984752 |
| ENSG00000122548 | KIAA0087      | 0.964469735 | 0.016758655 |
| ENSG00000056972 | TRAF3IP2      | 0.964479426 | 0.015210335 |
| ENSG00000197472 | ZNF695        | 0.964493021 | 0.033459308 |
| ENSG00000075407 | ZNF37A        | 0.964511596 | 0.022074762 |
| ENSG00000254349 | RP11-758M4.1  | 0.964550976 | 0.008347517 |
| ENSG00000131738 | KRT33B        | 0.96461983  | 0.015218783 |
| ENSG00000102069 | UBE2NL        | 0.964624433 | 0.011915582 |
| ENSG00000187783 | TMEM72        | 0.964631243 | 9.98E-06    |
| ENSG00000132128 | LRRC41        | 0.964643158 | 0.027547462 |
| ENSG00000126883 | NUP214        | 0.964680524 | 0.011501992 |
| ENSG00000141084 | RANBP10       | 0.964709692 | 0.000798656 |
| ENSG00000143398 | PIP5K1A       | 0.964714857 | 0.001740717 |
| ENSG00000182851 | GPIHBP1       | 0.964718371 | 0.002198806 |
| ENSG00000148541 | FAM13C        | 0.964733878 | 0.026321716 |
| ENSG00000137265 | IRF4          | 0.96473392  | 0.00073267  |
| ENSG00000092929 | UNC13D        | 0.964738843 | 0.012125297 |
| ENSG00000189430 | NCR1          | 0.964790214 | 0.002601712 |
| ENSG00000230989 | HSBP1         | 0.964796233 | 0.036574444 |
| ENSG00000178591 | DEFB125       | 0.964805681 | 0.002897151 |
| ENSG00000165821 | SALL2         | 0.964849332 | 0.014427191 |
| ENSG00000183682 | BMP8A         | 0.964860185 | 0.01253806  |
| ENSG00000185736 | ADARB2        | 0.964868803 | 0.048679292 |
| ENSG00000106686 | SPATA6L       | 0.964898423 | 0.036715352 |
| ENSG00000145428 | RNF175        | 0.964923536 | 0.014091507 |
| ENSG00000198648 | STK39         | 0.964927819 | 0.030218932 |
| ENSG00000180176 | TH            | 0.964938803 | 0.024768909 |
| ENSG00000188095 | MESP2         | 0.964943091 | 0.002851998 |
| ENSG00000102145 | GATA1         | 0.964955033 | 0.033577368 |
| ENSG00000177340 | AC024940.1    | 0.964974132 | 0.035977535 |
| ENSG00000159763 | PIP           | 0.964977544 | 0.037084605 |
| ENSG00000134020 | PEBP4         | 0.964982106 | 0.044076378 |
| ENSG00000104915 | STX10         | 0.964984085 | 0.00868257  |
| ENSG00000171936 | OR10H3        | 0.964985548 | 0.010773402 |
| ENSG00000111880 | RNGTT         | 0.964999378 | 0.046999679 |
| ENSG00000101746 | NOL4          | 0.965011183 | 0.024693491 |
| ENSG00000183154 | RP11-863K10.7 | 0.965031169 | 0.00562845  |

|                 |            |             |             |
|-----------------|------------|-------------|-------------|
| ENSG00000125888 | BANF2      | 0.965061285 | 0.020363619 |
| ENSG00000182870 | GALNT9     | 0.965061576 | 0.018776582 |
| ENSG00000144744 | UBA3       | 0.965061991 | 0.001002234 |
| ENSG00000120549 | KIAA1217   | 0.965097503 | 0.005394849 |
| ENSG00000196544 | C17orf59   | 0.965139252 | 0.047231359 |
| ENSG00000198929 | NOS1AP     | 0.965161209 | 0.030459992 |
| ENSG00000117751 | PPP1R8     | 0.965163781 | 0.009349081 |
| ENSG00000179943 | FIZ1       | 0.965182036 | 0.003212793 |
| ENSG00000125650 | PSPN       | 0.965191566 | 0.001362111 |
| ENSG00000142207 | URB1       | 0.965202427 | 0.011428065 |
| ENSG00000183562 | AC131971.1 | 0.965205539 | 0.018364191 |
| ENSG00000131095 | GFAP       | 0.96520669  | 0.006557918 |
| ENSG00000078246 | TULP3      | 0.965208938 | 0.017656235 |
| ENSG00000185513 | L3MBTL1    | 0.965211884 | 0.023610722 |
| ENSG00000212123 | PRR22      | 0.965228517 | 0.000429083 |
| ENSG00000122375 | OPN4       | 0.965230001 | 0.01501255  |
| ENSG00000132881 | RSG1       | 0.965241014 | 0.007622443 |
| ENSG00000166181 | API5       | 0.965250601 | 0.035758211 |
| ENSG00000092820 | EZR        | 0.965252034 | 0.04122054  |
| ENSG00000158458 | NRG2       | 0.965263977 | 0.00279739  |
| ENSG00000157542 | KCNJ6      | 0.965266028 | 0.015110419 |
| ENSG00000136238 | RAC1       | 0.965268743 | 0.0001223   |
| ENSG00000033627 | ATP6V0A1   | 0.965269048 | 0.004385616 |
| ENSG00000167733 | HSD11B1L   | 0.965272057 | 0.007834853 |
| ENSG00000133055 | MYBPH      | 0.965274913 | 0.048696757 |
| ENSG00000163377 | FAM19A4    | 0.965290682 | 0.005553565 |
| ENSG00000107518 | ATRNL1     | 0.965303425 | 0.032200953 |
| ENSG00000173253 | DMRT2      | 0.965312458 | 0.028742673 |
| ENSG00000115138 | POMC       | 0.965334234 | 0.031246192 |
| ENSG00000197651 | CCER1      | 0.965352123 | 0.010352865 |
| ENSG00000100764 | PSMC1      | 0.965354993 | 0.002828166 |
| ENSG00000170653 | ATF7       | 0.965359138 | 0.000179444 |
| ENSG00000111639 | MRPL51     | 0.965364658 | 0.010614538 |
| ENSG00000009694 | TENM1      | 0.965365571 | 0.007742833 |
| ENSG00000180901 | KCTD2      | 0.965373599 | 0.002483541 |
| ENSG00000167962 | ZNF598     | 0.965400162 | 0.003381657 |
| ENSG00000162706 | CADM3      | 0.965400623 | 0.049794956 |
| ENSG00000139977 | NAA30      | 0.965445323 | 0.002650667 |
| ENSG00000131899 | LLGL1      | 0.965452888 | 0.015942452 |
| ENSG00000128274 | A4GALT     | 0.965461729 | 0.034203762 |
| ENSG00000236104 | ZBTB22     | 0.965472511 | 0.001059909 |
| ENSG00000115665 | SLC5A7     | 0.965480917 | 0.012354454 |
| ENSG00000078142 | PIK3C3     | 0.965488107 | 0.009485241 |
| ENSG00000006625 | GGCT       | 0.965500417 | 0.000999916 |
| ENSG00000162231 | NXF1       | 0.965510848 | 0.029861    |
| ENSG00000048140 | TSPAN17    | 0.965517922 | 0.000740222 |
| ENSG00000134717 | BTF3L4     | 0.965519733 | 0.004331485 |

|                 |            |             |             |
|-----------------|------------|-------------|-------------|
| ENSG00000213923 | CSNK1E     | 0.965520265 | 0.043975823 |
| ENSG00000229200 | TRBV7-8    | 0.965521879 | 0.03877149  |
| ENSG00000133069 | TMCC2      | 0.965541524 | 0.001588859 |
| ENSG00000139515 | PDX1       | 0.965617145 | 0.04090893  |
| ENSG00000129170 | CSRP3      | 0.965648414 | 0.031643083 |
| ENSG00000171217 | CLDN20     | 0.965656078 | 0.014053766 |
| ENSG00000183155 | RABIF      | 0.965679814 | 0.039075117 |
| ENSG00000169862 | CTNND2     | 0.96568544  | 0.003098333 |
| ENSG00000127366 | TAS2R5     | 0.965686464 | 0.021233766 |
| ENSG00000164291 | ARSK       | 0.96568909  | 0.016445805 |
| ENSG00000163320 | CGGBP1     | 0.965723295 | 0.043893899 |
| ENSG00000102313 | ITIH6      | 0.965725399 | 0.027702804 |
| ENSG00000100348 | TXN2       | 0.965740925 | 0.020488727 |
| ENSG00000109163 | GNRHR      | 0.965764979 | 0.000726972 |
| ENSG00000138138 | ATAD1      | 0.965775406 | 0.027993016 |
| ENSG00000008197 | TFAP2D     | 0.965777385 | 0.025576937 |
| ENSG00000185787 | MORF4L1    | 0.965778719 | 0.005315404 |
| ENSG00000134308 | YWHAQ      | 0.965779818 | 0.010606896 |
| ENSG00000147443 | DOK2       | 0.965796789 | 0.042879791 |
| ENSG00000165417 | GTF2A1     | 0.965800685 | 0.046312733 |
| ENSG00000197309 | OR10D3     | 0.965836186 | 0.000317809 |
| ENSG00000108523 | RNF167     | 0.965844612 | 0.037420544 |
| ENSG00000111667 | USP5       | 0.965874259 | 0.027084508 |
| ENSG00000169994 | MYO7B      | 0.965927651 | 0.045021155 |
| ENSG00000168924 | LETM1      | 0.965938258 | 0.002976835 |
| ENSG00000110148 | CCKBR      | 0.965945791 | 0.046772378 |
| ENSG00000108417 | KRT37      | 0.965947642 | 0.037082596 |
| ENSG00000146425 | DYNLT1     | 0.965972198 | 0.030353617 |
| ENSG00000008710 | PKD1       | 0.965978239 | 0.027501141 |
| ENSG00000138641 | HERC3      | 0.966025635 | 0.002540947 |
| ENSG00000166426 | CRABP1     | 0.966039268 | 0.031558001 |
| ENSG00000182591 | KRTAP11-1  | 0.966041943 | 0.007459353 |
| ENSG00000198797 | BRINP2     | 0.966060081 | 0.045775052 |
| ENSG00000184361 | SPATA32    | 0.966110329 | 0.002240137 |
| ENSG00000117090 | SLAMF1     | 0.966125397 | 0.003259232 |
| ENSG00000152034 | MCHR2      | 0.966136085 | 0.00027021  |
| ENSG00000197272 | IL27       | 0.966145571 | 0.002962602 |
| ENSG00000065518 | NDUFB4     | 0.966167409 | 0.048615137 |
| ENSG00000211714 | TRBV7-3    | 0.966190993 | 0.046691503 |
| ENSG00000137707 | BTG4       | 0.966195695 | 0.000555319 |
| ENSG00000166402 | TUB        | 0.966212263 | 0.001034031 |
| ENSG00000156925 | ZIC3       | 0.96621593  | 0.019808996 |
| ENSG00000122863 | CHST3      | 0.966218249 | 0.030164032 |
| ENSG00000149922 | TBX6       | 0.966218841 | 0.037591986 |
| ENSG00000035681 | NSMAF      | 0.966226007 | 0.032180138 |
| ENSG00000176349 | AC110781.3 | 0.96626364  | 0.014220546 |
| ENSG00000132024 | CC2D1A     | 0.966264958 | 0.023535173 |

|                 |          |             |             |
|-----------------|----------|-------------|-------------|
| ENSG00000206190 | ATP10A   | 0.966266971 | 0.002214248 |
| ENSG00000187955 | COL14A1  | 0.966274816 | 0.008693425 |
| ENSG00000173335 | CST9     | 0.96628045  | 0.008193874 |
| ENSG00000196821 | C6orf106 | 0.966317303 | 0.048812523 |
| ENSG00000185760 | KCNQ5    | 0.96633827  | 0.001997608 |
| ENSG00000105227 | PRX      | 0.966351131 | 0.017942217 |
| ENSG00000117407 | ARTN     | 0.966352546 | 0.047461249 |
| ENSG00000135569 | TAAR5    | 0.966354806 | 0.041878909 |
| ENSG00000079277 | MKNK1    | 0.966354907 | 0.008815018 |
| ENSG00000177272 | KCNA3    | 0.966372835 | 0.039369481 |
| ENSG00000137497 | NUMA1    | 0.966375033 | 0.002753183 |
| ENSG00000143552 | NUP210L  | 0.966376894 | 0.010266347 |
| ENSG00000171720 | HDAC3    | 0.96637846  | 0.033994065 |
| ENSG00000100211 | CBY1     | 0.966398798 | 0.014138635 |
| ENSG00000161526 | SAP30BP  | 0.966417142 | 0.009308332 |
| ENSG00000008118 | CAMK1G   | 0.96642126  | 0.01061223  |
| ENSG00000168101 | NUDT16L1 | 0.966425258 | 0.00922454  |
| ENSG00000137413 | TAF8     | 0.966427387 | 0.000206408 |
| ENSG00000132297 | HHLA1    | 0.966429212 | 0.002111299 |
| ENSG00000164048 | ZNF589   | 0.966433547 | 0.001969866 |
| ENSG00000105507 | CABP5    | 0.966449616 | 0.003727284 |
| ENSG00000185880 | TRIM69   | 0.966453099 | 0.010308893 |
| ENSG00000012174 | MBTPS2   | 0.966457222 | 0.008296109 |
| ENSG00000197951 | ZNF71    | 0.966458031 | 0.000173053 |
| ENSG00000141580 | WDR45B   | 0.966464841 | 0.004386001 |
| ENSG00000161217 | PCYT1A   | 0.966478905 | 0.03877045  |
| ENSG00000154099 | DNAAF1   | 0.966489238 | 0.019565126 |
| ENSG00000259571 | BLID     | 0.966507411 | 0.01271101  |
| ENSG00000101230 | ISM1     | 0.9665789   | 0.010337957 |
| ENSG00000155875 | FAM154A  | 0.966582215 | 0.031307086 |
| ENSG00000151615 | POU4F2   | 0.966582638 | 0.045502387 |
| ENSG00000161594 | KLHL10   | 0.966583991 | 0.001530198 |
| ENSG00000241553 | ARPC4    | 0.966609143 | 0.004580555 |
| ENSG00000181240 | SLC25A41 | 0.966614142 | 0.034423433 |
| ENSG00000155367 | PPM1J    | 0.966659311 | 0.040915439 |
| ENSG00000184881 | OR51B2   | 0.966686063 | 0.022203786 |
| ENSG00000111237 | VPS29    | 0.966688617 | 0.005314368 |
| ENSG00000110066 | SUV420H1 | 0.966706212 | 0.037531317 |
| ENSG00000246223 | C14orf64 | 0.966708773 | 0.000600427 |
| ENSG00000136487 | GH2      | 0.966760313 | 0.005424708 |
| ENSG00000127837 | AAMP     | 0.966792583 | 0.026149602 |
| ENSG00000228146 | CASP16   | 0.966796259 | 0.022290187 |
| ENSG00000268341 | L47234.1 | 0.966807284 | 0.00798356  |
| ENSG00000110011 | DNAJC4   | 0.96683003  | 0.012347627 |
| ENSG00000196470 | SIAH1    | 0.966842347 | 0.001258991 |
| ENSG00000163449 | TMEM169  | 0.966843339 | 0.013813003 |
| ENSG00000154678 | PDE1C    | 0.966852629 | 0.038569088 |

|                 |          |             |             |
|-----------------|----------|-------------|-------------|
| ENSG00000175697 | GPR156   | 0.966886698 | 0.000773161 |
| ENSG00000168530 | MYL1     | 0.966942315 | 0.017472839 |
| ENSG00000127663 | KDM4B    | 0.966963237 | 0.01073642  |
| ENSG00000185352 | HS6ST3   | 0.967010506 | 0.008495919 |
| ENSG00000115145 | STAM2    | 0.967062705 | 0.003861426 |
| ENSG00000121417 | ZNF211   | 0.967068024 | 0.040606247 |
| ENSG00000163945 | UVSSA    | 0.967068257 | 0.033478615 |
| ENSG00000105695 | MAG      | 0.967100796 | 0.045930352 |
| ENSG00000183304 | FAM9A    | 0.967106535 | 0.002526533 |
| ENSG00000099995 | SF3A1    | 0.967117828 | 0.014078383 |
| ENSG00000166912 | MTMR10   | 0.967121571 | 0.022121724 |
| ENSG00000145901 | TNIP1    | 0.967142951 | 0.022830156 |
| ENSG00000085449 | WDFY1    | 0.967142957 | 0.032261301 |
| ENSG00000106829 | TLE4     | 0.967148132 | 0.038705454 |
| ENSG00000168418 | KCNG4    | 0.967164051 | 0.036501895 |
| ENSG00000173575 | CHD2     | 0.967174399 | 0.043398941 |
| ENSG00000149970 | CNKSR2   | 0.967176935 | 0.008937095 |
| ENSG00000173818 | ENDOV    | 0.967182121 | 0.008733309 |
| ENSG00000151079 | KCNA6    | 0.967189961 | 0.033171308 |
| ENSG00000177202 | SPACA4   | 0.967234761 | 0.011507628 |
| ENSG00000133619 | KRBA1    | 0.967281766 | 0.022592801 |
| ENSG00000166961 | MS4A15   | 0.967303488 | 0.030698485 |
| ENSG00000010256 | UQCRC1   | 0.96730753  | 0.02816926  |
| ENSG00000159917 | ZNF235   | 0.967312459 | 0.009830584 |
| ENSG00000166387 | PPFIBP2  | 0.967324363 | 0.046294395 |
| ENSG00000239998 | LILRA2   | 0.967335996 | 6.83E-05    |
| ENSG00000071553 | ATP6AP1  | 0.967340392 | 0.022464957 |
| ENSG00000151150 | ANK3     | 0.967347106 | 0.034817721 |
| ENSG00000171097 | CCBL1    | 0.967363364 | 0.048233882 |
| ENSG00000006576 | PHTF2    | 0.967384755 | 0.013364065 |
| ENSG00000168124 | OR1F1    | 0.967400633 | 0.048464056 |
| ENSG00000167751 | KLK2     | 0.96741326  | 0.009825652 |
| ENSG00000125821 | DTD1     | 0.967434399 | 0.011995736 |
| ENSG00000179542 | SLITRK4  | 0.967455824 | 0.017410869 |
| ENSG00000169239 | CA5B     | 0.96747213  | 0.04065641  |
| ENSG00000142252 | GEMIN7   | 0.967472229 | 0.037856878 |
| ENSG00000198105 | ZNF248   | 0.967473322 | 0.033837096 |
| ENSG00000178607 | ERN1     | 0.967485426 | 0.033089452 |
| ENSG00000021852 | C8B      | 0.967491991 | 0.046889325 |
| ENSG00000155085 | AK9      | 0.967504491 | 0.045991379 |
| ENSG00000178804 | H1FOO    | 0.967506914 | 0.009022287 |
| ENSG00000204703 | OR2B3    | 0.967515992 | 0.005093977 |
| ENSG00000101246 | ARFRP1   | 0.967526482 | 0.010210162 |
| ENSG00000105996 | HOXA2    | 0.967531069 | 0.04051208  |
| ENSG00000171133 | OR2K2    | 0.967547524 | 0.011563114 |
| ENSG00000143384 | MCL1     | 0.967561053 | 0.030329109 |
| ENSG00000187545 | PRAMEF10 | 0.96758486  | 0.041910668 |

|                 |            |             |             |
|-----------------|------------|-------------|-------------|
| ENSG00000170367 | CST5       | 0.967586791 | 0.023148229 |
| ENSG00000181786 | ACTL9      | 0.967593472 | 0.029471147 |
| ENSG00000188981 | MSANTD1    | 0.967599631 | 0.003265883 |
| ENSG00000091128 | LAMB4      | 0.967636172 | 0.043311479 |
| ENSG00000159527 | PGLYRP3    | 0.967638215 | 0.027495873 |
| ENSG00000070193 | FGF10      | 0.967638925 | 0.029845543 |
| ENSG00000130741 | EIF2S3     | 0.967639948 | 0.007256772 |
| ENSG00000167011 | NAT16      | 0.967643471 | 0.012658004 |
| ENSG00000108798 | ABI3       | 0.967653511 | 0.02620588  |
| ENSG00000180957 | PITPNB     | 0.967677474 | 4.83E-05    |
| ENSG00000111424 | VDR        | 0.96768291  | 0.011185272 |
| ENSG00000173039 | RELA       | 0.967729834 | 0.011784062 |
| ENSG00000173077 | 1-Dec      | 0.96774857  | 0.016317646 |
| ENSG00000217455 | AC091801.1 | 0.967761604 | 0.025657552 |
| ENSG00000131355 | EMR3       | 0.967779897 | 0.023834285 |
| ENSG00000205060 | SLC35B4    | 0.967803256 | 0.036978833 |
| ENSG00000106304 | SPAM1      | 0.967827532 | 0.002285371 |
| ENSG00000119283 | TRIM67     | 0.967828691 | 0.018911676 |
| ENSG00000188725 | SMIM15     | 0.967833302 | 0.010998055 |
| ENSG00000147570 | DNAJC5B    | 0.967843458 | 0.028359962 |
| ENSG00000111653 | ING4       | 0.967854953 | 0.00584255  |
| ENSG00000147912 | FBXO10     | 0.967855697 | 0.000791428 |
| ENSG00000121022 | COPS5      | 0.967865788 | 0.018378695 |
| ENSG00000100220 | RTCB       | 0.967893527 | 0.045276446 |
| ENSG00000196632 | WNK3       | 0.967898096 | 0.003401474 |
| ENSG00000182224 | CYB5D1     | 0.96791017  | 0.020600312 |
| ENSG00000113845 | TIMMDC1    | 0.96791641  | 0.013729933 |
| ENSG00000186575 | NF2        | 0.96792878  | 0.006621263 |
| ENSG00000148604 | RGR        | 0.967930748 | 0.008279698 |
| ENSG00000166819 | PLIN1      | 0.967934232 | 0.034604015 |
| ENSG00000160299 | PCNT       | 0.967959786 | 0.033511721 |
| ENSG00000181016 | LSMEM1     | 0.967962526 | 0.039429129 |
| ENSG00000141433 | ADCYAP1    | 0.967990853 | 0.012986938 |
| ENSG00000173662 | TAS1R1     | 0.967997054 | 0.009133466 |
| ENSG00000180777 | ANKRD30B   | 0.968001284 | 0.01458234  |
| ENSG00000105583 | WDR83OS    | 0.968002407 | 0.02665243  |
| ENSG00000129562 | DAD1       | 0.968002527 | 0.011152565 |
| ENSG00000141759 | TXNL4A     | 0.968005046 | 0.033760063 |
| ENSG00000154143 | PANX3      | 0.968020345 | 0.01398628  |
| ENSG00000049192 | ADAMTS6    | 0.968034167 | 0.048379115 |
| ENSG00000148680 | HTR7       | 0.968038336 | 0.000615443 |
| ENSG00000142405 | NLRP12     | 0.968050391 | 0.022655126 |
| ENSG00000172765 | TMCC1      | 0.968092962 | 0.045759101 |
| ENSG00000168131 | OR2B2      | 0.968129676 | 0.032228822 |
| ENSG00000100461 | RBM23      | 0.968165033 | 0.036093238 |
| ENSG00000138944 | KIAA1644   | 0.968178077 | 0.016161907 |
| ENSG00000091704 | CPA1       | 0.968221054 | 0.00899642  |

|                 |         |             |             |
|-----------------|---------|-------------|-------------|
| ENSG00000077238 | IL4R    | 0.968231674 | 0.043548088 |
| ENSG00000104131 | EIF3J   | 0.968276434 | 0.048806133 |
| ENSG00000167325 | RRM1    | 0.968341292 | 0.030410133 |
| ENSG00000090674 | MCOLN1  | 0.968353879 | 0.004662104 |
| ENSG00000087263 | OGFOD1  | 0.968381551 | 0.045555025 |
| ENSG00000188312 | CENPP   | 0.968381764 | 0.004555966 |
| ENSG00000057468 | MSH4    | 0.968383439 | 0.021886099 |
| ENSG00000185231 | MC2R    | 0.968401259 | 0.001716881 |
| ENSG00000213654 | GP3M3   | 0.968414096 | 0.009497966 |
| ENSG00000055917 | PUM2    | 0.968453398 | 0.001884195 |
| ENSG00000222004 | C7orf71 | 0.968460904 | 0.013504205 |
| ENSG00000130167 | TSPAN16 | 0.968489814 | 0.016484759 |
| ENSG00000120948 | TARDBP  | 0.968506284 | 0.008649552 |
| ENSG00000162763 | LRRC52  | 0.968510182 | 0.007171798 |
| ENSG00000165792 | METTL17 | 0.968536835 | 0.016484489 |
| ENSG00000140319 | SRP14   | 0.968541499 | 0.004314111 |
| ENSG00000101425 | BPI     | 0.968580126 | 0.002272815 |
| ENSG00000239306 | RBM14   | 0.968596123 | 0.004533359 |
| ENSG00000204396 | VWA7    | 0.968614184 | 0.025878795 |
| ENSG00000176624 | MEX3C   | 0.96862603  | 0.002488089 |
| ENSG00000163564 | PYHIN1  | 0.968632393 | 0.031079402 |
| ENSG00000126895 | AVPR2   | 0.968658563 | 0.047252749 |
| ENSG00000074582 | BCS1L   | 0.968663888 | 0.043852684 |
| ENSG00000006712 | PAF1    | 0.968670717 | 0.035066606 |
| ENSG00000157734 | SNX22   | 0.968676456 | 0.005107954 |
| ENSG00000122223 | CD244   | 0.968680989 | 0.005309053 |
| ENSG00000162723 | SLAMF9  | 0.968717837 | 0.00020411  |
| ENSG00000012232 | EXTL3   | 0.968742573 | 0.002896848 |
| ENSG00000180720 | CHRM4   | 0.968747031 | 0.02598415  |
| ENSG00000106299 | WASL    | 0.968752826 | 0.018594361 |
| ENSG00000122756 | CNTFR   | 0.968760298 | 0.041433363 |
| ENSG00000184166 | OR1D2   | 0.968793878 | 0.040902763 |
| ENSG00000168228 | ZCCHC4  | 0.968796929 | 0.000438875 |
| ENSG00000171611 | PTCRA   | 0.968827874 | 0.017729418 |
| ENSG00000167103 | PIP5K1  | 0.96883776  | 0.029157382 |
| ENSG00000105220 | GPI     | 0.968852213 | 0.023939403 |
| ENSG00000138468 | SENP7   | 0.968860706 | 0.010664473 |
| ENSG00000149646 | CNBD2   | 0.968873493 | 0.002917437 |
| ENSG00000251247 | ZNF345  | 0.968892613 | 0.005310283 |
| ENSG00000176407 | KCMF1   | 0.968919958 | 0.035767336 |
| ENSG00000106636 | YKT6    | 0.96892091  | 0.009795831 |
| ENSG00000112115 | IL17A   | 0.968974798 | 0.024543924 |
| ENSG00000087191 | PSMC5   | 0.968977947 | 0.026147783 |
| ENSG00000143839 | REN     | 0.968980156 | 0.010962333 |
| ENSG00000185049 | NELFA   | 0.969012838 | 0.019737318 |
| ENSG00000166948 | TGM6    | 0.969016507 | 0.022205011 |
| ENSG00000064218 | DMRT3   | 0.96903735  | 0.00893098  |

|                 |          |             |             |
|-----------------|----------|-------------|-------------|
| ENSG00000164615 | CAMLG    | 0.969056199 | 0.009193687 |
| ENSG00000106479 | ZNF862   | 0.969079969 | 0.026102042 |
| ENSG00000172680 | MOS      | 0.96908183  | 0.048871903 |
| ENSG00000196792 | STRN3    | 0.969117251 | 0.037965733 |
| ENSG00000183668 | PSG9     | 0.969126054 | 0.023923613 |
| ENSG00000180304 | OAZ2     | 0.969132514 | 0.022808052 |
| ENSG00000182718 | ANXA2    | 0.969135097 | 0.001881364 |
| ENSG00000155275 | TRMT44   | 0.969147626 | 0.014152639 |
| ENSG00000137875 | BCL2L10  | 0.969148779 | 0.017669746 |
| ENSG00000185345 | PARK2    | 0.969152786 | 0.003741992 |
| ENSG00000166704 | ZNF606   | 0.969171603 | 0.034521127 |
| ENSG00000118886 | GABRR2   | 0.969193638 | 0.034460982 |
| ENSG00000124391 | IL17C    | 0.96919767  | 0.037065771 |
| ENSG00000125337 | KIF25    | 0.969218888 | 0.030324157 |
| ENSG00000075415 | SLC25A3  | 0.969228161 | 0.045036925 |
| ENSG00000127419 | TMEM175  | 0.969240824 | 0.034586106 |
| ENSG00000213699 | SLC35F6  | 0.969245048 | 0.002420405 |
| ENSG00000156931 | VPS8     | 0.969283196 | 0.033270912 |
| ENSG00000144285 | SCN1A    | 0.969284871 | 0.000740716 |
| ENSG00000197769 | MAP1LC3C | 0.969295689 | 0.033718104 |
| ENSG00000196132 | MYT1     | 0.969337456 | 0.019040652 |
| ENSG00000181222 | POLR2A   | 0.969346365 | 0.004413383 |
| ENSG00000177984 | LCN15    | 0.969348703 | 0.016712293 |
| ENSG00000161647 | MPP3     | 0.969356095 | 0.04059102  |
| ENSG00000186197 | EDARADD  | 0.969357515 | 0.032644873 |
| ENSG00000139209 | SLC38A4  | 0.969399452 | 0.041998865 |
| ENSG00000161277 | THAP8    | 0.969413512 | 0.03422347  |
| ENSG00000155966 | AFF2     | 0.969436893 | 0.029919718 |
| ENSG00000160271 | RALGDS   | 0.969439388 | 0.043869967 |
| ENSG00000124227 | ANKRD60  | 0.969451579 | 0.043190835 |
| ENSG00000144488 | ESPNL    | 0.969474434 | 0.019279107 |
| ENSG00000186143 | C2orf53  | 0.96949073  | 0.023245852 |
| ENSG00000072062 | PRKACA   | 0.969491287 | 0.010315054 |
| ENSG00000108788 | MLX      | 0.969499489 | 0.003348328 |
| ENSG00000197019 | SERTAD1  | 0.969543209 | 0.013659177 |
| ENSG00000119487 | MAPKAP1  | 0.969549375 | 0.040408024 |
| ENSG00000053501 | USE1     | 0.969550748 | 0.003675895 |
| ENSG00000138347 | MYPN     | 0.969553259 | 0.011734897 |
| ENSG00000134982 | APC      | 0.969574142 | 0.046705934 |
| ENSG00000183837 | PNMA3    | 0.969577432 | 0.003274654 |
| ENSG00000182389 | CACNB4   | 0.969579237 | 0.029163753 |
| ENSG00000124818 | OPN5     | 0.969587059 | 0.00635434  |
| ENSG00000186960 | C14orf23 | 0.969589558 | 0.028888698 |
| ENSG00000124657 | OR2B6    | 0.969623031 | 0.044703437 |
| ENSG00000127241 | MASP1    | 0.96964557  | 4.15E-05    |
| ENSG00000187010 | RHD      | 0.969658045 | 0.005476551 |
| ENSG00000186501 | TMEM222  | 0.969667887 | 0.0146191   |

|                 |          |             |             |
|-----------------|----------|-------------|-------------|
| ENSG0000068724  | TTC7A    | 0.969670894 | 0.015986452 |
| ENSG00000140992 | PDPK1    | 0.969671259 | 0.001632256 |
| ENSG00000168036 | CTNNB1   | 0.969700659 | 0.033159392 |
| ENSG00000116183 | PAPPA2   | 0.969702304 | 0.010127501 |
| ENSG00000176490 | DIRAS1   | 0.969719405 | 0.032722659 |
| ENSG00000174151 | CYB561D1 | 0.969745225 | 0.007432259 |
| ENSG00000104907 | TRMT1    | 0.96976093  | 0.031694309 |
| ENSG0000067646  | ZFY      | 0.969769562 | 0.013904552 |
| ENSG00000166220 | TBATA    | 0.969841763 | 0.017153372 |
| ENSG00000109771 | LRP2BP   | 0.969854723 | 0.026442652 |
| ENSG00000105880 | DLX5     | 0.969866332 | 0.033902691 |
| ENSG00000128709 | HOXD9    | 0.969932648 | 0.00438086  |
| ENSG00000115593 | SMYD1    | 0.969935241 | 0.00352981  |
| ENSG00000163254 | CRYGC    | 0.969947457 | 0.026858811 |
| ENSG0000067177  | PHKA1    | 0.969970777 | 0.017523287 |
| ENSG00000185722 | ANKFY1   | 0.96999721  | 0.010439884 |
| ENSG00000104695 | PPP2CB   | 0.970007872 | 0.028709622 |
| ENSG00000135740 | SLC9A5   | 0.970051942 | 0.02736299  |
| ENSG00000100351 | GRAP2    | 0.970052201 | 0.039783049 |
| ENSG00000103978 | TMEM87A  | 0.970057101 | 0.032843524 |
| ENSG00000184276 | DEFB108B | 0.97007962  | 0.019117308 |
| ENSG00000157933 | SKI      | 0.970091503 | 0.005600922 |
| ENSG00000107829 | FBXW4    | 0.970107381 | 0.021485242 |
| ENSG00000142233 | NTN5     | 0.970113024 | 0.049867638 |
| ENSG00000113946 | CLDN16   | 0.970113711 | 0.007992629 |
| ENSG00000183250 | C21orf67 | 0.970131047 | 0.001903895 |
| ENSG00000101079 | NDRG3    | 0.970149007 | 0.033708947 |
| ENSG00000185988 | PLK5     | 0.970152971 | 0.005840333 |
| ENSG00000130489 | SCO2     | 0.970193071 | 0.00394605  |
| ENSG00000086758 | HUWE1    | 0.970202558 | 0.001069822 |
| ENSG00000114742 | WDR48    | 0.97020361  | 9.05E-05    |
| ENSG00000164588 | HCN1     | 0.970208996 | 0.001845165 |
| ENSG00000076258 | FMO4     | 0.970214827 | 0.034539991 |
| ENSG00000111640 | GAPDH    | 0.970226981 | 0.010838096 |
| ENSG00000066382 | MPPED2   | 0.97025876  | 0.020375481 |
| ENSG00000158552 | ZFAND2B  | 0.97027985  | 0.01915055  |
| ENSG00000163885 | CCDC37   | 0.97029385  | 0.049194995 |
| ENSG00000166924 | NYAP1    | 0.970307106 | 0.007526314 |
| ENSG00000221870 | TMEM257  | 0.970323087 | 0.036267917 |
| ENSG00000133706 | LARS     | 0.970324671 | 0.033739887 |
| ENSG00000164325 | TMEM174  | 0.97033035  | 0.00320303  |
| ENSG00000141252 | VPS53    | 0.970331312 | 0.006550452 |
| ENSG00000176340 | COX8A    | 0.970358866 | 0.004909118 |
| ENSG00000132589 | FLOT2    | 0.970359923 | 0.008169985 |
| ENSG00000104941 | RSPH6A   | 0.970376953 | 0.036285592 |
| ENSG00000167971 | CASKIN1  | 0.970395573 | 0.012510263 |
| ENSG00000156968 | MPV17L   | 0.97042842  | 0.040486053 |

|                 |          |             |             |
|-----------------|----------|-------------|-------------|
| ENSG00000110880 | CORO1C   | 0.970438292 | 0.046039722 |
| ENSG00000169933 | FRMPD4   | 0.970451912 | 0.045395966 |
| ENSG00000103194 | USP10    | 0.970473833 | 0.047784772 |
| ENSG00000163915 | C3orf65  | 0.970481581 | 0.00330427  |
| ENSG00000065883 | CDK13    | 0.970486606 | 0.013341834 |
| ENSG00000145192 | AHSG     | 0.970491323 | 0.022825404 |
| ENSG00000227059 | ANHx     | 0.970493474 | 0.022428032 |
| ENSG00000141371 | C17orf64 | 0.970513732 | 0.048635389 |
| ENSG00000162881 | OXER1    | 0.970525789 | 0.00121775  |
| ENSG00000116237 | ICMT     | 0.970538326 | 0.000506729 |
| ENSG00000103852 | TTC23    | 0.970554693 | 0.031745233 |
| ENSG00000160360 | GPSM1    | 0.970556752 | 0.033132425 |
| ENSG00000165125 | TRPV6    | 0.970561739 | 0.025961182 |
| ENSG00000198553 | KCNRG    | 0.97057719  | 0.024645732 |
| ENSG00000110786 | PTPN5    | 0.970597247 | 0.009475311 |
| ENSG00000147813 | NAPRT1   | 0.97060042  | 0.012630314 |
| ENSG00000182149 | IST1     | 0.970630934 | 0.004946622 |
| ENSG00000170855 | TRIAP1   | 0.970650281 | 0.015142028 |
| ENSG00000144741 | SLC25A26 | 0.970664887 | 0.020978557 |
| ENSG00000141570 | CBX8     | 0.970677672 | 0.040903861 |
| ENSG00000249961 | CCDC79   | 0.970738184 | 0.043663057 |
| ENSG00000088320 | REM1     | 0.970743699 | 0.035170232 |
| ENSG00000100316 | RPL3     | 0.970774816 | 0.000379295 |
| ENSG00000174576 | NPAS4    | 0.970776298 | 0.012222571 |
| ENSG00000099999 | RNF215   | 0.970786528 | 0.042609732 |
| ENSG00000120805 | ARL1     | 0.9708064   | 0.034227642 |
| ENSG00000131080 | EDA2R    | 0.970808984 | 0.032572624 |
| ENSG00000173175 | ADCY5    | 0.97080935  | 0.005677988 |
| ENSG00000143278 | F13B     | 0.970823651 | 0.045791245 |
| ENSG00000142408 | CACNG8   | 0.970828538 | 0.033100293 |
| ENSG00000100201 | DDX17    | 0.970843269 | 0.025299881 |
| ENSG00000253305 | PCDHGB6  | 0.970852153 | 0.016375741 |
| ENSG00000015676 | NUDCD3   | 0.970863227 | 0.0072683   |
| ENSG00000162961 | DPY30    | 0.970874688 | 0.016627421 |
| ENSG00000161649 | CD300LG  | 0.970885902 | 0.001061137 |
| ENSG00000110851 | PRDM4    | 0.970889896 | 0.042710187 |
| ENSG00000165280 | VCP      | 0.970894822 | 0.021356192 |
| ENSG00000153827 | TRIP12   | 0.970899274 | 0.020253367 |
| ENSG00000137434 | C6orf52  | 0.970901709 | 0.022511846 |
| ENSG00000184056 | VPS33B   | 0.970913421 | 0.013854097 |
| ENSG00000167664 | TMIGD2   | 0.970923147 | 0.03368077  |
| ENSG00000139767 | SRRM4    | 0.970925321 | 0.029078611 |
| ENSG00000168746 | C20orf62 | 0.970938293 | 0.002773003 |
| ENSG00000150394 | CDH8     | 0.97094216  | 0.000227351 |
| ENSG00000166455 | C16orf46 | 0.970946525 | 0.04628423  |
| ENSG00000154518 | ATP5G3   | 0.970957815 | 0.031737644 |
| ENSG00000105737 | GRIK5    | 0.970975751 | 0.018110736 |

|                 |               |             |             |
|-----------------|---------------|-------------|-------------|
| ENSG00000106028 | SSBP1         | 0.971036374 | 0.026102304 |
| ENSG00000204252 | HLA-DOA       | 0.971043947 | 0.001571088 |
| ENSG00000144893 | MED12L        | 0.971059013 | 0.006320141 |
| ENSG00000079482 | OPHN1         | 0.971083249 | 0.001781379 |
| ENSG00000142149 | HUNK          | 0.971168761 | 0.043009785 |
| ENSG00000134160 | TRPM1         | 0.971172219 | 0.001773268 |
| ENSG00000114204 | SERPINI2      | 0.971222135 | 0.046466151 |
| ENSG00000166377 | ATP9B         | 0.9712384   | 0.009966355 |
| ENSG00000103495 | MAZ           | 0.971257583 | 0.036681479 |
| ENSG00000141040 | ZNF287        | 0.971264209 | 0.02315222  |
| ENSG00000162571 | TTL10         | 0.971286042 | 0.039283302 |
| ENSG00000139155 | SLCO1C1       | 0.971294363 | 0.035823023 |
| ENSG00000107882 | SUFU          | 0.971296012 | 0.00237205  |
| ENSG00000002919 | SNX11         | 0.97129615  | 0.004489903 |
| ENSG00000056586 | RC3H2         | 0.971326758 | 0.027090457 |
| ENSG00000176994 | SMCR8         | 0.971351551 | 0.030542928 |
| ENSG00000052723 | SIKE1         | 0.97137513  | 0.043263465 |
| ENSG00000132874 | SLC14A2       | 0.971429455 | 0.016538716 |
| ENSG00000159905 | ZNF221        | 0.971466683 | 0.036656183 |
| ENSG00000123643 | SLC36A1       | 0.971468833 | 0.017577434 |
| ENSG00000125492 | BARHL1        | 0.971475678 | 0.000934094 |
| ENSG00000123576 | ESX1          | 0.97149003  | 0.010843372 |
| ENSG00000167612 | ANKRD33       | 0.971496106 | 0.037868631 |
| ENSG00000055955 | ITIH4         | 0.971520496 | 0.02620327  |
| ENSG00000204539 | CDSN          | 0.971520611 | 0.00755676  |
| ENSG00000128989 | ARPP19        | 0.971521435 | 0.014169567 |
| ENSG00000044459 | CNTLN         | 0.971537371 | 0.048549642 |
| ENSG00000156689 | GLYATL2       | 0.971543928 | 0.009557435 |
| ENSG00000169154 | GOT1L1        | 0.971548719 | 0.000651781 |
| ENSG00000184647 | PRSS55        | 0.971567556 | 0.039844648 |
| ENSG00000164270 | HTR4          | 0.971583327 | 0.014876767 |
| ENSG00000101162 | TUBB1         | 0.971587434 | 0.02990181  |
| ENSG00000185896 | LAMP1         | 0.971603949 | 0.035168313 |
| ENSG00000204131 | NHSL2         | 0.971605182 | 0.032349302 |
| ENSG00000186732 | MPPED1        | 0.971638122 | 0.0298253   |
| ENSG00000205838 | TTC23L        | 0.971659822 | 0.001569048 |
| ENSG00000268926 | DKFZP434H0512 | 0.971676357 | 0.009149759 |
| ENSG00000070388 | FGF22         | 0.971676401 | 0.035356375 |
| ENSG00000162704 | ARPC5         | 0.971682663 | 0.00774529  |
| ENSG00000145337 | PYURF         | 0.971690234 | 0.034286662 |
| ENSG00000139083 | ETV6          | 0.971690841 | 0.047628832 |
| ENSG00000206532 | RP11-553A10.1 | 0.971718289 | 0.028261781 |
| ENSG00000151461 | UPF2          | 0.971722047 | 0.031361004 |
| ENSG00000240682 | ISY1          | 0.971731586 | 0.012194012 |
| ENSG00000134333 | LDHA          | 0.97174954  | 0.013308237 |
| ENSG00000184381 | PLA2G6        | 0.971751116 | 0.029964406 |
| ENSG00000110484 | SCGB2A2       | 0.971758376 | 0.002282734 |

|                 |          |             |             |
|-----------------|----------|-------------|-------------|
| ENSG00000180483 | DEFB119  | 0.971767169 | 0.003727218 |
| ENSG00000132639 | SNAP25   | 0.971768045 | 0.040690768 |
| ENSG00000080166 | DCT      | 0.9717702   | 0.038704163 |
| ENSG00000197302 | ZNF720   | 0.971772734 | 0.043840069 |
| ENSG00000164007 | CLDN19   | 0.971794978 | 0.008575415 |
| ENSG00000197780 | TAF13    | 0.971800162 | 0.022230045 |
| ENSG00000125166 | GOT2     | 0.971811664 | 0.01811046  |
| ENSG00000227868 | C1orf234 | 0.971846127 | 0.047688085 |
| ENSG00000180016 | OR1E1    | 0.971856244 | 0.024381723 |
| ENSG00000137992 | DBT      | 0.971864944 | 0.031864716 |
| ENSG00000007545 | CRAMP1L  | 0.971926489 | 0.020698765 |
| ENSG00000156575 | PRG3     | 0.971935186 | 0.026259977 |
| ENSG00000196338 | NLGN3    | 0.971937869 | 0.039940498 |
| ENSG00000196776 | CD47     | 0.971939919 | 0.02988865  |
| ENSG00000100012 | SEC14L3  | 0.971942004 | 0.003379394 |
| ENSG00000133030 | MPRIIP   | 0.971945849 | 0.042621409 |
| ENSG00000138688 | KIAA1109 | 0.971951791 | 0.023427474 |
| ENSG00000182103 | FAM181B  | 0.971965933 | 0.037665797 |
| ENSG00000177047 | IFNW1    | 0.972013176 | 0.037052441 |
| ENSG00000241837 | ATP5O    | 0.972015162 | 0.013239682 |
| ENSG00000122733 | KIAA1045 | 0.972051376 | 0.000494044 |
| ENSG00000198650 | TAT      | 0.972053233 | 0.030641149 |
| ENSG00000091640 | SPAG7    | 0.972081289 | 0.028119355 |
| ENSG00000136861 | CDK5RAP2 | 0.972097472 | 0.039957211 |
| ENSG00000136925 | TSTD2    | 0.972133971 | 0.039200695 |
| ENSG00000053254 | FOXN3    | 0.972137389 | 0.001323482 |
| ENSG00000111676 | ATN1     | 0.972172083 | 0.020017489 |
| ENSG00000141376 | BCAS3    | 0.972226781 | 0.048919547 |
| ENSG00000103035 | PSMD7    | 0.972241161 | 0.038493355 |
| ENSG00000168070 | C11orf85 | 0.972278684 | 0.048804651 |
| ENSG00000162384 | C1orf123 | 0.972329535 | 0.016532516 |
| ENSG00000017621 | MAGIX    | 0.972334039 | 0.034072213 |
| ENSG00000222040 | ADRA2B   | 0.972345579 | 0.040173023 |
| ENSG00000220008 | LINGO3   | 0.97238795  | 0.00186687  |
| ENSG00000150760 | DOCK1    | 0.972400421 | 0.014248154 |
| ENSG00000211639 | IGLV4-60 | 0.972492121 | 0.02874555  |
| ENSG00000102984 | ZNF821   | 0.972517202 | 0.017355087 |
| ENSG00000198798 | MAGEB3   | 0.972563088 | 0.001279283 |
| ENSG00000091831 | ESR1     | 0.972618818 | 0.046468673 |
| ENSG00000167671 | UBXN6    | 0.972643294 | 0.013684833 |
| ENSG00000101017 | CD40     | 0.972655765 | 0.015052596 |
| ENSG00000169006 | NTSR2    | 0.972660882 | 0.018136844 |
| ENSG00000236279 | CLEC2L   | 0.972688078 | 0.034151007 |
| ENSG00000168385 | 2-Sep    | 0.972719109 | 0.009817715 |
| ENSG00000119231 | SENP5    | 0.972732251 | 0.002685956 |
| ENSG00000132017 | DCAF15   | 0.972735018 | 0.024617819 |
| ENSG00000061337 | LZTS1    | 0.972742441 | 0.015841312 |

|                 |           |             |             |
|-----------------|-----------|-------------|-------------|
| ENSG00000160226 | C21orf2   | 0.972746608 | 0.045285644 |
| ENSG00000144771 | LRTM1     | 0.972760374 | 0.002454392 |
| ENSG00000163793 | DNAJC5G   | 0.972802322 | 0.049048593 |
| ENSG00000221900 | POM121L12 | 0.972804455 | 0.036078879 |
| ENSG00000146360 | GPR6      | 0.97281863  | 0.015962126 |
| ENSG00000172409 | CLP1      | 0.972840657 | 0.004278079 |
| ENSG00000165702 | GF1B      | 0.972841979 | 0.03105838  |
| ENSG00000164082 | GRM2      | 0.972860092 | 0.02389338  |
| ENSG00000188778 | ADRB3     | 0.972879731 | 0.046318973 |
| ENSG00000168374 | ARF4      | 0.972912211 | 0.00228704  |
| ENSG00000197965 | MPZL1     | 0.972936847 | 0.023543678 |
| ENSG00000173208 | ABCD2     | 0.972942842 | 0.031565513 |
| ENSG00000101558 | VAPA      | 0.972980028 | 0.008959296 |
| ENSG00000148513 | ANKRD30A  | 0.973017121 | 0.017584226 |
| ENSG00000163810 | TGM4      | 0.973038235 | 0.018898117 |
| ENSG00000185985 | SLITRK2   | 0.973079913 | 0.016174758 |
| ENSG00000131725 | WDR44     | 0.973121737 | 0.031485286 |
| ENSG00000163681 | SLMAP     | 0.973126649 | 0.044626511 |
| ENSG00000119616 | FCF1      | 0.973129137 | 0.042421626 |
| ENSG00000198185 | ZNF334    | 0.973135956 | 0.028276458 |
| ENSG00000205856 | C22orf42  | 0.973167056 | 0.027462767 |
| ENSG00000178789 | CD300LB   | 0.973194227 | 0.018304214 |
| ENSG00000197226 | TBC1D9B   | 0.97322714  | 0.020113563 |
| ENSG00000113578 | FGF1      | 0.973228655 | 0.012454839 |
| ENSG00000163877 | SNIP1     | 0.973230505 | 0.023829809 |
| ENSG00000259092 | TRAV30    | 0.973243481 | 0.033048781 |
| ENSG00000005961 | ITGA2B    | 0.973248347 | 0.011488304 |
| ENSG00000182533 | CAV3      | 0.973258873 | 0.040447298 |
| ENSG00000145536 | ADAMTS16  | 0.973264417 | 0.040962287 |
| ENSG00000034239 | EFCAB1    | 0.973267275 | 0.010107804 |
| ENSG00000158859 | ADAMTS4   | 0.973280441 | 0.027348671 |
| ENSG00000180921 | FAM83H    | 0.973282166 | 0.027857939 |
| ENSG00000102230 | PCYT1B    | 0.973285893 | 0.038320617 |
| ENSG00000156113 | KCNMA1    | 0.973344494 | 0.038675445 |
| ENSG00000205108 | FAM205A   | 0.973348757 | 0.046300359 |
| ENSG00000135074 | ADAM19    | 0.973361008 | 0.022438191 |
| ENSG00000092841 | MYL6      | 0.973377559 | 0.000122255 |
| ENSG00000173157 | ADAMTS20  | 0.973381711 | 0.007415579 |
| ENSG00000175262 | C1orf127  | 0.973404543 | 0.030777383 |
| ENSG00000088826 | SMOX      | 0.973432704 | 0.033255042 |
| ENSG00000165584 | SSX3      | 0.97343908  | 0.023400767 |
| ENSG00000145965 | C6ORF50   | 0.973462662 | 0.016711022 |
| ENSG00000168159 | RNF187    | 0.973497175 | 0.002100433 |
| ENSG00000054654 | SYNE2     | 0.973498782 | 0.037906418 |
| ENSG00000165119 | HNRNPK    | 0.973514988 | 0.002215071 |
| ENSG00000164180 | TMEM161B  | 0.973531231 | 0.041122972 |
| ENSG00000136492 | BRIP1     | 0.973545716 | 0.036834866 |

|                 |           |             |             |
|-----------------|-----------|-------------|-------------|
| ENSG00000124613 | ZNF391    | 0.973548592 | 0.047295228 |
| ENSG00000138622 | HCN4      | 0.973553632 | 0.01990272  |
| ENSG00000004660 | CAMKK1    | 0.973576242 | 0.007902279 |
| ENSG00000172493 | AFF1      | 0.973576897 | 0.011764857 |
| ENSG00000115310 | RTN4      | 0.973591365 | 0.010430468 |
| ENSG00000169635 | HIC2      | 0.973618789 | 0.025150439 |
| ENSG00000021461 | CYP3A43   | 0.97363861  | 0.021085456 |
| ENSG00000113312 | TTC1      | 0.973640945 | 0.043174156 |
| ENSG00000185448 | FAM47A    | 0.973650869 | 0.045528919 |
| ENSG00000160716 | CHRN2     | 0.97368427  | 0.010180893 |
| ENSG00000165124 | SVEP1     | 0.97370701  | 0.041487124 |
| ENSG00000165059 | PRKACG    | 0.973715226 | 0.02209106  |
| ENSG00000111271 | ACAD10    | 0.973787143 | 0.015261125 |
| ENSG00000184792 | OSBP2     | 0.973791256 | 0.001639923 |
| ENSG00000169570 | DTWD2     | 0.973797458 | 0.012441343 |
| ENSG00000163939 | PBRM1     | 0.973801464 | 0.00012528  |
| ENSG00000164123 | C4orf45   | 0.973817566 | 0.029338711 |
| ENSG00000142864 | SERBP1    | 0.973830179 | 0.031143995 |
| ENSG00000167555 | ZNF528    | 0.973849621 | 0.00601006  |
| ENSG00000141956 | PRDM15    | 0.973864677 | 0.001152988 |
| ENSG00000104983 | CCDC61    | 0.973902001 | 0.014369151 |
| ENSG00000117971 | CHRN4     | 0.973922162 | 0.018394522 |
| ENSG00000174437 | ATP2A2    | 0.973939255 | 0.001088758 |
| ENSG00000133243 | BTBD2     | 0.973993367 | 0.048355475 |
| ENSG00000111261 | MANSC1    | 0.974001386 | 0.0460884   |
| ENSG00000167100 | SAMD14    | 0.974037599 | 0.032551183 |
| ENSG00000167470 | MIDN      | 0.97404144  | 0.028192148 |
| ENSG00000213246 | SUPT4H1   | 0.974136795 | 0.044703086 |
| ENSG00000141068 | KSR1      | 0.974152044 | 0.002893972 |
| ENSG00000127526 | SLC35E1   | 0.974163846 | 0.030596959 |
| ENSG00000169313 | P2RY12    | 0.974188854 | 0.035312768 |
| ENSG00000175376 | EIF1AD    | 0.974210973 | 0.019162691 |
| ENSG00000175106 | TVP23C    | 0.974225947 | 0.001295277 |
| ENSG00000182070 | OR52A1    | 0.97423167  | 0.019919531 |
| ENSG00000188394 | GPR21     | 0.974252946 | 0.035750446 |
| ENSG00000183379 | SYNDIG1L  | 0.974261201 | 0.041660845 |
| ENSG00000090534 | THPO      | 0.97428325  | 0.001107656 |
| ENSG00000115266 | APC2      | 0.974299756 | 0.039807714 |
| ENSG00000136750 | GAD2      | 0.974343289 | 0.005709807 |
| ENSG00000142937 | RPS8      | 0.974371596 | 0.017762043 |
| ENSG00000184271 | POU6F1    | 0.974431872 | 0.024638742 |
| ENSG00000135486 | HNRNPA1   | 0.974439487 | 0.040972208 |
| ENSG00000244694 | PTCHD4    | 0.974458148 | 0.033834244 |
| ENSG00000198374 | HIST1H2AL | 0.974468301 | 0.037747068 |
| ENSG00000170145 | SIK2      | 0.974473111 | 0.006321367 |
| ENSG00000187792 | ZNF70     | 0.974503621 | 0.012015482 |
| ENSG00000086062 | B4GALT1   | 0.97453197  | 0.00730199  |

|                 |            |             |             |
|-----------------|------------|-------------|-------------|
| ENSG00000127481 | UBR4       | 0.974551879 | 0.012370353 |
| ENSG00000132341 | RAN        | 0.974560643 | 0.049516097 |
| ENSG00000165202 | OR1Q1      | 0.974635116 | 0.023114649 |
| ENSG00000039068 | CDH1       | 0.974655481 | 0.026975622 |
| ENSG00000085644 | ZNF213     | 0.974714479 | 0.044615593 |
| ENSG00000157423 | HYDIN      | 0.974733831 | 0.035537876 |
| ENSG00000163444 | TMEM183A   | 0.974773429 | 0.009465695 |
| ENSG00000106631 | MYL7       | 0.974827709 | 0.037472728 |
| ENSG00000205835 | GMNC       | 0.974838416 | 0.029535458 |
| ENSG00000237190 | CDKN2AIPNL | 0.9748732   | 0.034213284 |
| ENSG00000138286 | FAM149B1   | 0.974891441 | 0.012541976 |
| ENSG00000204231 | RXRB       | 0.974936238 | 0.020476612 |
| ENSG00000147432 | CHRN3      | 0.974952915 | 0.016176    |
| ENSG00000116678 | LEPR       | 0.974969283 | 0.02764562  |
| ENSG00000112273 | HDGFL1     | 0.974980694 | 0.030597855 |
| ENSG00000147421 | HMBX1      | 0.974982489 | 0.041179438 |
| ENSG00000177733 | HNRNPA0    | 0.975019711 | 0.005680585 |
| ENSG00000215788 | TNFRSF25   | 0.975111664 | 0.04077279  |
| ENSG00000166716 | ZNF592     | 0.975117255 | 0.036450827 |
| ENSG00000135407 | AVIL       | 0.975117678 | 0.025327625 |
| ENSG00000127804 | METTL16    | 0.975179038 | 0.049653605 |
| ENSG00000134830 | C5AR2      | 0.975211159 | 0.014920045 |
| ENSG00000171094 | ALK        | 0.975212083 | 0.017541867 |
| ENSG00000095981 | KCNK16     | 0.975220226 | 0.028908792 |
| ENSG00000110171 | TRIM3      | 0.975312829 | 0.025171164 |
| ENSG00000168802 | CHTF8      | 0.975371955 | 0.021188418 |
| ENSG00000113716 | HMGXB3     | 0.975397564 | 0.026760547 |
| ENSG00000156574 | NODAL      | 0.975437059 | 0.031408433 |
| ENSG00000135365 | PHF21A     | 0.975445008 | 0.044234841 |
| ENSG00000173612 | GPRC6A     | 0.975477514 | 0.015347349 |
| ENSG00000203942 | C10orf62   | 0.975503811 | 0.031906077 |
| ENSG00000119698 | PPP4R4     | 0.975535114 | 0.043176599 |
| ENSG00000008735 | MAPK8IP2   | 0.975548343 | 0.02907396  |
| ENSG00000149295 | DRD2       | 0.975569771 | 0.002473434 |
| ENSG00000136848 | DAB2IP     | 0.975574493 | 0.045647156 |
| ENSG00000120279 | MYCT1      | 0.975611526 | 0.02947098  |
| ENSG00000122145 | TBX22      | 0.975620333 | 0.039641935 |
| ENSG00000167604 | NFKBID     | 0.975656414 | 0.038249168 |
| ENSG00000115423 | DNAH6      | 0.975764313 | 0.000113947 |
| ENSG00000149925 | ALDOA      | 0.975801572 | 0.006441063 |
| ENSG00000119669 | IRF2BPL    | 0.975856847 | 0.045509967 |
| ENSG00000184224 | C11orf72   | 0.975858033 | 0.037517662 |
| ENSG00000133020 | MYH8       | 0.975859549 | 0.032354514 |
| ENSG00000135973 | GPR45      | 0.97592506  | 0.038833044 |
| ENSG00000100413 | POLR3H     | 0.975980309 | 0.008555972 |
| ENSG00000180332 | KCTD4      | 0.976042957 | 0.007140204 |
| ENSG00000149177 | PTPRJ      | 0.976053827 | 0.001771905 |

|                 |          |             |             |
|-----------------|----------|-------------|-------------|
| ENSG00000147113 | CXorf36  | 0.976097929 | 0.016004471 |
| ENSG00000158435 | CNOT11   | 0.976107538 | 0.025400065 |
| ENSG00000186298 | PPP1CC   | 0.976113864 | 0.015270511 |
| ENSG00000196263 | ZNF471   | 0.976240735 | 0.008087663 |
| ENSG00000117036 | ETV3     | 0.976262259 | 0.025530716 |
| ENSG00000170616 | SCRT1    | 0.976279237 | 0.027041344 |
| ENSG00000068903 | SIRT2    | 0.976287886 | 0.017883685 |
| ENSG00000120457 | KCNJ5    | 0.976304515 | 0.039446844 |
| ENSG00000167098 | SUN5     | 0.976314951 | 0.033391848 |
| ENSG00000115353 | TACR1    | 0.97631622  | 0.038320951 |
| ENSG00000152455 | SUV39H2  | 0.976340323 | 0.012126058 |
| ENSG00000165566 | AMER2    | 0.976349497 | 0.012954201 |
| ENSG00000153246 | PLA2R1   | 0.976364176 | 0.026708389 |
| ENSG00000132906 | CASP9    | 0.976379898 | 0.006321143 |
| ENSG00000163875 | MEAF6    | 0.976446878 | 0.043814054 |
| ENSG00000022355 | GABRA1   | 0.976471773 | 0.043590497 |
| ENSG00000146839 | ZAN      | 0.976497689 | 0.030396173 |
| ENSG00000124702 | KLHDC3   | 0.976530998 | 0.029471491 |
| ENSG00000196368 | NUDT11   | 0.976534215 | 0.01442158  |
| ENSG00000187116 | LILRA5   | 0.976576124 | 0.015360577 |
| ENSG00000163914 | RHO      | 0.976663583 | 0.044994288 |
| ENSG00000183735 | TBK1     | 0.97669054  | 0.018972241 |
| ENSG00000113812 | ACTR8    | 0.976712552 | 0.027049695 |
| ENSG00000198746 | GPATCH3  | 0.976769024 | 0.038725026 |
| ENSG00000058335 | RASGRF1  | 0.976819204 | 0.011297906 |
| ENSG00000213347 | MXD3     | 0.976829287 | 0.044342453 |
| ENSG00000162399 | BSND     | 0.976985196 | 0.031772415 |
| ENSG00000143355 | LHX9     | 0.977011061 | 0.002826151 |
| ENSG00000156395 | SORCS3   | 0.977026788 | 0.017744194 |
| ENSG00000090975 | PITPNM2  | 0.977076902 | 0.004154922 |
| ENSG00000162913 | C1orf145 | 0.977119869 | 0.01517704  |
| ENSG00000119392 | GLE1     | 0.977174336 | 0.046936144 |
| ENSG00000170364 | SETMAR   | 0.977180963 | 0.039574111 |
| ENSG00000111879 | FAM184A  | 0.977203675 | 0.038572673 |
| ENSG00000166091 | CMTM5    | 0.977227692 | 0.028611284 |
| ENSG00000100353 | EIF3D    | 0.977230879 | 0.037775576 |
| ENSG00000127412 | TRPV5    | 0.977241964 | 0.019183337 |
| ENSG00000070756 | PABPC1   | 0.97737943  | 0.011766466 |
| ENSG00000114316 | USP4     | 0.977401442 | 0.013958044 |
| ENSG00000116688 | MFN2     | 0.97741781  | 0.038078519 |
| ENSG00000099338 | CATSPERG | 0.977421285 | 0.036360025 |
| ENSG00000132692 | BCAN     | 0.977428231 | 0.012288378 |
| ENSG00000100150 | DEPDC5   | 0.977456552 | 0.017801201 |
| ENSG00000213398 | LCAT     | 0.977492223 | 0.025076495 |
| ENSG00000163633 | C4orf36  | 0.977515642 | 0.037465068 |
| ENSG00000164742 | ADCY1    | 0.977571896 | 0.032381044 |
| ENSG00000177511 | ST8SIA3  | 0.977586372 | 0.020309706 |

|                 |           |             |             |
|-----------------|-----------|-------------|-------------|
| ENSG00000163888 | CAMK2N2   | 0.977632833 | 0.049390482 |
| ENSG00000174886 | NDUFA11   | 0.977701858 | 0.013431373 |
| ENSG00000196600 | SLC22A25  | 0.977709565 | 0.040621696 |
| ENSG00000118276 | B4GALT6   | 0.977722681 | 0.015839443 |
| ENSG00000168229 | PTGDR     | 0.977764977 | 0.041239666 |
| ENSG00000162551 | ALPL      | 0.977796309 | 0.02673608  |
| ENSG00000080603 | SRCAP     | 0.977798857 | 0.035227613 |
| ENSG00000165682 | CLEC1B    | 0.977804969 | 0.047638743 |
| ENSG00000050628 | PTGER3    | 0.977817306 | 0.021367984 |
| ENSG00000134313 | KIDINS220 | 0.977829352 | 0.009542    |
| ENSG00000178171 | AMER3     | 0.977831805 | 0.047195845 |
| ENSG00000135387 | CAPRIN1   | 0.977835782 | 0.048797467 |
| ENSG00000144218 | AFF3      | 0.977843566 | 0.010369111 |
| ENSG00000160055 | TMEM234   | 0.977909959 | 0.046271312 |
| ENSG00000143199 | ADCY10    | 0.977917914 | 0.045135319 |
| ENSG00000167383 | ZNF229    | 0.97794838  | 0.021146306 |
| ENSG00000170370 | EMX2      | 0.977975278 | 0.03419915  |
| ENSG00000086102 | NFX1      | 0.977982436 | 0.00716485  |
| ENSG00000086666 | ZFAND6    | 0.97801536  | 0.029104256 |
| ENSG00000166262 | FAM227B   | 0.978019478 | 0.03893572  |
| ENSG00000136928 | GABBR2    | 0.978051105 | 0.018362119 |
| ENSG00000179846 | NKPD1     | 0.978052372 | 0.04315936  |
| ENSG00000173064 | HECTD4    | 0.978059951 | 0.022234184 |
| ENSG00000162244 | RPL29     | 0.978072289 | 0.024763128 |
| ENSG00000146530 | VWDE      | 0.978142563 | 0.033048071 |
| ENSG00000161016 | RPL8      | 0.978224434 | 0.030766325 |
| ENSG00000100354 | TNRC6B    | 0.978254874 | 0.036199479 |
| ENSG00000124440 | HIF3A     | 0.978362452 | 0.034475094 |
| ENSG00000183032 | SLC25A21  | 0.978503928 | 0.021723685 |
| ENSG00000184752 | NDUFA12   | 0.978582036 | 0.021468358 |
| ENSG00000107929 | LARP4B    | 0.978595614 | 0.017016447 |
| ENSG00000112640 | PPP2R5D   | 0.978621011 | 0.007980422 |
| ENSG00000120899 | PTK2B     | 0.978643159 | 0.036368197 |
| ENSG00000163803 | PLB1      | 0.978648943 | 0.048535636 |
| ENSG00000174374 | WBSCR16   | 0.978661972 | 0.009992162 |
| ENSG00000005889 | ZFX       | 0.978731704 | 0.012969497 |
| ENSG00000170348 | TMED10    | 0.978751643 | 0.016178271 |
| ENSG00000155868 | MED7      | 0.97876359  | 0.043909947 |
| ENSG00000063169 | GLTSCR1   | 0.978835618 | 0.045927653 |
| ENSG00000175390 | EIF3F     | 0.978838906 | 0.033449037 |
| ENSG00000125851 | PCSK2     | 0.978846266 | 0.010324992 |
| ENSG00000137204 | SLC22A7   | 0.978928589 | 0.032844844 |
| ENSG00000182256 | GABRG3    | 0.978960813 | 0.035592663 |
| ENSG00000142784 | WDTC1     | 0.979003594 | 0.041374412 |
| ENSG00000198625 | MDM4      | 0.979161937 | 0.041571339 |
| ENSG00000130589 | HELZ2     | 0.979167311 | 0.006458037 |
| ENSG00000096264 | NCR2      | 0.979171142 | 0.044038113 |

|                 |            |             |             |
|-----------------|------------|-------------|-------------|
| ENSG00000185650 | ZFP36L1    | 0.979236286 | 0.024217063 |
| ENSG00000135116 | HRK        | 0.979253725 | 0.028765428 |
| ENSG00000139644 | TMBIM6     | 0.97927523  | 0.020613643 |
| ENSG00000169021 | UQCRFS1    | 0.97929532  | 0.048741656 |
| ENSG00000145826 | LECT2      | 0.9794074   | 0.039849963 |
| ENSG00000203630 | AL136531.1 | 0.979415888 | 0.043580123 |
| ENSG00000125363 | AMELX      | 0.979420554 | 0.00779124  |
| ENSG00000112077 | RHAG       | 0.979512505 | 0.017424173 |
| ENSG00000224586 | GPX5       | 0.979604753 | 0.001353804 |
| ENSG00000159082 | SYNJ1      | 0.979614708 | 0.047121272 |
| ENSG00000126752 | SSX1       | 0.979630143 | 0.028288187 |
| ENSG00000133226 | SRRM1      | 0.979662078 | 0.042491409 |
| ENSG00000153266 | FEZF2      | 0.979667469 | 0.013992605 |
| ENSG00000157060 | SHCBP1L    | 0.979690784 | 0.031750374 |
| ENSG00000136156 | ITM2B      | 0.979695271 | 0.020813365 |
| ENSG0000007001  | UPP2       | 0.979810543 | 0.037417836 |
| ENSG00000106113 | CRHR2      | 0.979970086 | 0.032675922 |
| ENSG00000095777 | MYO3A      | 0.980008989 | 0.032322112 |
| ENSG00000094914 | AAAS       | 0.980114215 | 0.037453394 |
| ENSG00000155640 | C10orf12   | 0.980142435 | 0.019731466 |
| ENSG00000198707 | CEP290     | 0.98016072  | 0.037408102 |
| ENSG00000163517 | HDAC11     | 0.980201117 | 0.049546792 |
| ENSG00000005381 | MPO        | 0.98022951  | 0.042849335 |
| ENSG00000072840 | EVC        | 0.980256298 | 0.044793093 |
| ENSG00000163646 | CLRN1      | 0.980272557 | 0.019590921 |
| ENSG00000169045 | HNRNPH1    | 0.980320655 | 0.025328912 |
| ENSG00000112539 | C6orf118   | 0.980428681 | 0.048032384 |
| ENSG00000162490 | DRAXIN     | 0.980453422 | 0.021440199 |
| ENSG00000197471 | SPN        | 0.980488234 | 0.028731192 |
| ENSG00000136758 | YME1L1     | 0.980505123 | 0.008907698 |
| ENSG00000181541 | MAB21L2    | 0.980525972 | 0.034909224 |
| ENSG00000166189 | HPS6       | 0.980615576 | 0.015684582 |
| ENSG00000182223 | ZAR1       | 0.980717186 | 0.035366837 |
| ENSG00000101977 | MCF2       | 0.980746189 | 0.044018913 |
| ENSG00000165023 | DIRAS2     | 0.980750767 | 0.03132997  |
| ENSG00000183117 | CSMD1      | 0.980839508 | 0.032803433 |
| ENSG00000160396 | HIPK4      | 0.980897465 | 0.007679832 |
| ENSG00000078687 | TNRC6C     | 0.981144186 | 0.020095479 |
| ENSG00000170322 | NFRKB      | 0.981194978 | 0.029586299 |
| ENSG00000129245 | FXR2       | 0.981276544 | 0.047681558 |
| ENSG00000126091 | ST3GAL3    | 0.981499394 | 0.011442645 |
| ENSG00000070413 | DGCR2      | 0.981509593 | 0.003363087 |
| ENSG00000132693 | CRP        | 0.981562083 | 0.013895169 |
| ENSG00000167378 | IRGQ       | 0.98159226  | 0.008841964 |
| ENSG00000183035 | CYLC1      | 0.981775105 | 0.006875387 |
| ENSG00000010704 | HFE        | 0.981875317 | 0.023926899 |
| ENSG00000197106 | SLC6A17    | 0.981918464 | 0.023740275 |

|                 |         |             |             |
|-----------------|---------|-------------|-------------|
| ENSG00000091664 | SLC17A6 | 0.981941587 | 0.028787707 |
| ENSG00000169641 | LUZP1   | 0.982012804 | 0.033370432 |
| ENSG00000146926 | ASB10   | 0.982053786 | 0.045942198 |
| ENSG00000198373 | WWP2    | 0.98206067  | 0.046720939 |
| ENSG00000204688 | OR2H1   | 0.982106656 | 0.021586736 |
| ENSG00000183473 | SSTR3   | 0.98221272  | 0.036844713 |
| ENSG00000112238 | PRDM13  | 0.982259147 | 0.049591728 |
| ENSG00000064225 | ST3GAL6 | 0.982309075 | 0.036047854 |
| ENSG00000150991 | UBC     | 0.982612505 | 0.030002009 |
| ENSG00000104327 | CALB1   | 0.983038914 | 0.03960878  |
| ENSG00000135503 | ACVR1B  | 0.98334548  | 0.012639094 |
| ENSG00000110321 | EIF4G2  | 0.983588612 | 0.002534858 |
| ENSG00000116459 | ATP5F1  | 0.983608417 | 0.048606265 |
| ENSG00000011007 | TCEB3   | 0.98379937  | 0.047753168 |
| ENSG00000131143 | COX4I1  | 0.9838978   | 0.027231617 |
| ENSG00000122136 | OBP2A   | 0.983936963 | 0.029237516 |
| ENSG00000186469 | GNG2    | 0.98426509  | 0.032548733 |
| ENSG00000049618 | ARID1B  | 0.984280777 | 0.034151422 |
| ENSG00000121351 | IAPP    | 0.984469505 | 0.034197881 |
| ENSG00000169031 | COL4A3  | 0.984518853 | 0.032921544 |
| ENSG00000135930 | EIF4E2  | 0.984846446 | 0.03718891  |
| ENSG00000156508 | EEF1A1  | 0.984977752 | 0.000907529 |
| ENSG00000115355 | CCDC88A | 0.985147718 | 0.038422382 |
| ENSG00000119321 | FKBP15  | 0.985197716 | 0.01823421  |
| ENSG00000154975 | CA10    | 0.986396928 | 0.019353111 |
| ENSG00000198242 | RPL23A  | 1.011668173 | 0.036554852 |
| ENSG00000173660 | UQCRH   | 1.013976327 | 0.046099495 |
| ENSG00000147231 | CXorf57 | 1.013999443 | 0.034887564 |
| ENSG00000115084 | SLC35F5 | 1.015778295 | 0.046553739 |
| ENSG00000198840 | MT-ND3  | 1.016042513 | 0.000666338 |
| ENSG00000179909 | ZNF154  | 1.016536661 | 0.034434106 |
| ENSG00000197958 | RPL12   | 1.016840625 | 0.022644949 |
| ENSG00000145075 | CCDC39  | 1.017028188 | 0.04149884  |
| ENSG00000145451 | GLRA3   | 1.017208435 | 0.039664605 |
| ENSG00000112695 | COX7A2  | 1.017580897 | 0.017907258 |
| ENSG00000142039 | CCDC97  | 1.017707944 | 0.037331403 |
| ENSG00000144791 | LIMD1   | 1.017815107 | 0.028863332 |
| ENSG00000119574 | ZBTB45  | 1.018284886 | 0.009695034 |
| ENSG00000118181 | RPS25   | 1.018488969 | 0.042654692 |
| ENSG00000221983 | UBA52   | 1.018517685 | 0.033529939 |
| ENSG00000134644 | PUM1    | 1.018541337 | 0.013355091 |
| ENSG00000124614 | RPS10   | 1.018616301 | 0.000300177 |
| ENSG00000090266 | NDUFB2  | 1.018720757 | 0.033098069 |
| ENSG00000189266 | PNRC2   | 1.01872397  | 0.017423035 |
| ENSG00000126698 | DNAJC8  | 1.018761674 | 0.042006646 |
| ENSG00000147183 | CPXCR1  | 1.018814233 | 0.04240892  |
| ENSG00000188612 | SUMO2   | 1.019172803 | 0.030856976 |

|                 |         |             |             |
|-----------------|---------|-------------|-------------|
| ENSG00000250486 | FAM218A | 1.019371656 | 0.043950272 |
| ENSG00000083168 | KAT6A   | 1.019470988 | 0.049393889 |
| ENSG00000154654 | NCAM2   | 1.019535117 | 0.023521296 |
| ENSG00000185024 | BRF1    | 1.019555552 | 0.026123357 |
| ENSG00000132670 | PTPRA   | 1.019585378 | 0.037489097 |
| ENSG00000075702 | WDR62   | 1.019802826 | 0.049878171 |
| ENSG00000196262 | PPIA    | 1.020092418 | 0.009409143 |
| ENSG00000079335 | CDC14A  | 1.020169239 | 0.045202412 |
| ENSG00000140285 | FGF7    | 1.020256975 | 0.039034056 |
| ENSG00000198918 | RPL39   | 1.020356195 | 0.019567704 |
| ENSG00000118680 | MYL12B  | 1.020480628 | 0.009767904 |
| ENSG00000186439 | TRDN    | 1.02048972  | 0.009411645 |
| ENSG00000106803 | SEC61B  | 1.020559829 | 0.004437691 |
| ENSG00000198026 | ZNF335  | 1.020588705 | 0.044822645 |
| ENSG00000123411 | IKZF4   | 1.020641754 | 0.015442566 |
| ENSG00000197748 | WDR96   | 1.020837594 | 0.034220786 |
| ENSG00000172888 | ZNF621  | 1.021342809 | 0.043569499 |
| ENSG00000118257 | NRP2    | 1.0214595   | 0.025201438 |
| ENSG00000116584 | ARHGEF2 | 1.021493289 | 0.022414279 |
| ENSG00000151292 | CSNK1G3 | 1.02151003  | 0.036765027 |
| ENSG00000075568 | TMEM131 | 1.021590541 | 0.025216606 |
| ENSG00000196683 | TOMM7   | 1.021596405 | 0.027564625 |
| ENSG00000168356 | SCN11A  | 1.021792571 | 0.014255378 |
| ENSG00000196440 | ARMCX4  | 1.021831873 | 0.040732288 |
| ENSG00000116117 | PARD3B  | 1.021866814 | 0.007447355 |
| ENSG00000126231 | PROZ    | 1.021898506 | 0.043896667 |
| ENSG00000167910 | CYP7A1  | 1.02190205  | 0.03356216  |
| ENSG00000090615 | GOLGA3  | 1.021942925 | 0.02823887  |
| ENSG00000102054 | RBBP7   | 1.021944393 | 0.046467923 |
| ENSG00000197296 | FITM2   | 1.022083216 | 0.011531808 |
| ENSG00000120160 | EQTN    | 1.022241415 | 0.001947497 |
| ENSG00000090487 | SPG21   | 1.022244929 | 0.037824765 |
| ENSG00000206560 | ANKRD28 | 1.02229738  | 0.046443612 |
| ENSG00000077254 | USP33   | 1.02247145  | 0.008624101 |
| ENSG00000124444 | ZNF576  | 1.022499374 | 0.027474973 |
| ENSG00000123572 | NRK     | 1.022500166 | 0.04816416  |
| ENSG00000174276 | ZNHIT2  | 1.022511521 | 0.03307774  |
| ENSG00000163041 | H3F3A   | 1.022630537 | 0.0036722   |
| ENSG00000065427 | KARS    | 1.022637192 | 0.037553821 |
| ENSG00000144040 | SFXN5   | 1.022817386 | 0.037171115 |
| ENSG00000175602 | CCDC85B | 1.022860585 | 0.025154485 |
| ENSG00000131051 | RBM39   | 1.022870249 | 0.030215818 |
| ENSG00000164418 | GRIK2   | 1.022876592 | 0.005861077 |
| ENSG00000197451 | HNRNPAB | 1.023006814 | 0.029574413 |
| ENSG00000128322 | IGLL1   | 1.023021571 | 0.040251923 |
| ENSG00000197894 | ADH5    | 1.023048702 | 0.033350885 |
| ENSG00000162300 | ZFPL1   | 1.02317083  | 0.042124058 |

|                 |          |             |             |
|-----------------|----------|-------------|-------------|
| ENSG00000184863 | RBM33    | 1.023206672 | 0.039904108 |
| ENSG00000163626 | COX18    | 1.02322991  | 0.01406982  |
| ENSG00000103855 | CD276    | 1.023273769 | 0.003995306 |
| ENSG00000172534 | HCFC1    | 1.023336803 | 0.019821065 |
| ENSG00000179774 | ATOH7    | 1.023415733 | 0.019786337 |
| ENSG00000154370 | TRIM11   | 1.023436097 | 0.030554612 |
| ENSG00000090061 | CCNK     | 1.023467213 | 0.046727536 |
| ENSG00000006468 | ETV1     | 1.023622882 | 0.041535108 |
| ENSG00000107618 | RBP3     | 1.023773104 | 0.04248665  |
| ENSG00000138606 | SHF      | 1.023910345 | 0.034539726 |
| ENSG00000269781 | FLJ20306 | 1.02391285  | 0.048892891 |
| ENSG00000160767 | FAM189B  | 1.023956408 | 0.01086317  |
| ENSG00000104760 | FGL1     | 1.024148594 | 0.037845944 |
| ENSG00000182512 | GLRX5    | 1.024149271 | 0.023267817 |
| ENSG00000257103 | LSM14A   | 1.024168259 | 0.016949955 |
| ENSG00000143970 | ASXL2    | 1.024210615 | 0.027462676 |
| ENSG00000053918 | KCNQ1    | 1.024225055 | 0.026058141 |
| ENSG00000172167 | MTBP     | 1.024375818 | 0.04751869  |
| ENSG00000177963 | RIC8A    | 1.024386205 | 0.012759176 |
| ENSG00000196663 | TECPR2   | 1.024526709 | 0.024822684 |
| ENSG00000182791 | CCDC87   | 1.024533462 | 0.020054884 |
| ENSG00000129055 | ANAPC13  | 1.024537162 | 0.01828911  |
| ENSG00000172728 | FUT10    | 1.024601302 | 0.015982883 |
| ENSG00000178562 | CD28     | 1.024631994 | 0.022641158 |
| ENSG00000168612 | ZSWIM1   | 1.024710597 | 0.020516724 |
| ENSG00000179364 | PACS2    | 1.024713003 | 0.010798482 |
| ENSG00000008256 | CYTH3    | 1.024716015 | 0.009878668 |
| ENSG00000169567 | HINT1    | 1.024785345 | 0.020527625 |
| ENSG00000188846 | RPL14    | 1.024789196 | 0.00953537  |
| ENSG00000117697 | NSL1     | 1.024842958 | 0.011693322 |
| ENSG00000204590 | GNL1     | 1.024928142 | 0.016604683 |
| ENSG00000169180 | XPO6     | 1.024931912 | 0.001940235 |
| ENSG00000031823 | RANBP3   | 1.024952386 | 0.028939436 |
| ENSG00000153037 | SRP19    | 1.025151309 | 0.032326476 |
| ENSG00000112655 | PTK7     | 1.025265096 | 0.023232399 |
| ENSG00000185338 | SOCS1    | 1.025288309 | 0.023174684 |
| ENSG00000134824 | FADS2    | 1.025295771 | 0.046512926 |
| ENSG00000085872 | CHERP    | 1.025306206 | 0.004624516 |
| ENSG00000132463 | GRSF1    | 1.025328073 | 0.022106771 |
| ENSG00000158156 | XKR8     | 1.025425357 | 0.030993682 |
| ENSG00000174460 | ZCCHC12  | 1.025439908 | 0.040045654 |
| ENSG00000130522 | JUND     | 1.025490989 | 0.031301977 |
| ENSG00000129103 | SUMF2    | 1.025563983 | 0.01626704  |
| ENSG00000144848 | ATG3     | 1.025643891 | 0.041446881 |
| ENSG00000134825 | TMEM258  | 1.025646227 | 0.00580828  |
| ENSG00000143727 | ACP1     | 1.025708156 | 0.017633766 |
| ENSG00000114391 | RPL24    | 1.025729052 | 0.00465458  |

|                 |              |             |             |
|-----------------|--------------|-------------|-------------|
| ENSG00000158691 | ZSCAN12      | 1.025864672 | 0.046052927 |
| ENSG00000168906 | MAT2A        | 1.025874948 | 0.03070014  |
| ENSG00000215897 | ZBTB8B       | 1.025937889 | 0.038522237 |
| ENSG00000130726 | TRIM28       | 1.026006898 | 0.040621419 |
| ENSG00000176476 | CCDC101      | 1.026019411 | 0.04795057  |
| ENSG00000015171 | ZMYND11      | 1.026186148 | 0.041750112 |
| ENSG00000205629 | LCMT1        | 1.026215801 | 0.029399487 |
| ENSG00000146143 | PRIM2        | 1.02623618  | 0.020694966 |
| ENSG00000137409 | MTCH1        | 1.026239687 | 0.045316713 |
| ENSG00000186866 | POFUT2       | 1.026242254 | 0.044977067 |
| ENSG00000116288 | PARK7        | 1.026282919 | 7.20E-05    |
| ENSG00000204371 | EHMT2        | 1.026316557 | 0.014037054 |
| ENSG00000196235 | SUPT5H       | 1.026361967 | 0.04839984  |
| ENSG00000144369 | FAM171B      | 1.026394744 | 0.006254486 |
| ENSG00000124813 | RUNX2        | 1.026498647 | 0.017077614 |
| ENSG00000070366 | SMG6         | 1.026509554 | 0.043489745 |
| ENSG00000178732 | GP5          | 1.02654169  | 0.049253237 |
| ENSG00000124562 | SNRPC        | 1.026683097 | 0.02810029  |
| ENSG00000143878 | RHOB         | 1.026689485 | 0.048430205 |
| ENSG00000149806 | FAU          | 1.026732254 | 0.000828485 |
| ENSG00000179314 | WSCD1        | 1.026737329 | 0.045005591 |
| ENSG00000136828 | RALGPS1      | 1.02674916  | 0.018898923 |
| ENSG00000106991 | ENG          | 1.026755729 | 0.011106721 |
| ENSG00000104859 | CLASRP       | 1.026773687 | 0.010157122 |
| ENSG00000131469 | RPL27        | 1.026819975 | 0.002570215 |
| ENSG00000089248 | ERP29        | 1.026882126 | 0.024984431 |
| ENSG00000112667 | DNPH1        | 1.026910741 | 0.02910118  |
| ENSG00000206562 | METTL6       | 1.02692798  | 0.021824303 |
| ENSG00000105373 | GLTSCR2      | 1.026936363 | 0.012692628 |
| ENSG00000143549 | TPM3         | 1.02702587  | 0.000905486 |
| ENSG00000143222 | UFC1         | 1.027043972 | 0.003062659 |
| ENSG00000099910 | KLHL22       | 1.027094485 | 0.010153875 |
| ENSG00000205649 | HTN3         | 1.027136332 | 0.019732442 |
| ENSG00000224870 | RP4-75&J18.2 | 1.027145004 | 0.017630684 |
| ENSG00000198099 | ADH4         | 1.027193472 | 0.041664442 |
| ENSG00000142794 | NBPF3        | 1.027280069 | 0.014458362 |
| ENSG00000102974 | CTCF         | 1.027289406 | 0.024108252 |
| ENSG00000117899 | MESDC2       | 1.027295048 | 0.003803478 |
| ENSG00000170464 | DNAJC18      | 1.027424128 | 0.009234734 |
| ENSG00000145191 | EIF2B5       | 1.027465827 | 0.026682155 |
| ENSG00000196865 | NHLRC2       | 1.02747037  | 0.031706972 |
| ENSG00000174145 | KIAA1239     | 1.027477991 | 0.021001963 |
| ENSG00000125485 | DDX31        | 1.027492816 | 0.03536769  |
| ENSG00000069329 | VPS35        | 1.027496007 | 0.006032526 |
| ENSG00000129084 | PSMA1        | 1.027500311 | 0.004484162 |
| ENSG00000133466 | C1QTNF6      | 1.027610964 | 0.02006689  |
| ENSG00000173486 | FKBP2        | 1.027644671 | 0.012365051 |

|                 |           |             |             |
|-----------------|-----------|-------------|-------------|
| ENSG00000170234 | PWWP2A    | 1.027731682 | 0.002985243 |
| ENSG00000139915 | MDGA2     | 1.027759713 | 0.006590472 |
| ENSG00000166986 | MARS      | 1.0277714   | 0.032288046 |
| ENSG00000176177 | ENTHD1    | 1.02778428  | 0.009201117 |
| ENSG00000136938 | ANP32B    | 1.027829676 | 0.000635351 |
| ENSG00000214556 | C17orf98  | 1.027840895 | 0.036678147 |
| ENSG00000168038 | ULK4      | 1.027843121 | 0.00877677  |
| ENSG00000083807 | SLC27A5   | 1.027870197 | 0.021478131 |
| ENSG00000067596 | DHX8      | 1.027931945 | 0.012920622 |
| ENSG00000156603 | MED19     | 1.028000273 | 0.005084538 |
| ENSG00000185523 | C1orf227  | 1.028063992 | 0.010298045 |
| ENSG00000081800 | SLC13A1   | 1.028068496 | 0.016345572 |
| ENSG00000146834 | MEPCE     | 1.028089442 | 0.039769451 |
| ENSG00000168621 | GDNF      | 1.028100802 | 0.007056591 |
| ENSG00000172809 | RPL38     | 1.028148695 | 0.024085363 |
| ENSG00000135097 | MSI1      | 1.028160169 | 0.040387466 |
| ENSG00000124383 | MPHOSPH10 | 1.028252769 | 0.018014906 |
| ENSG00000072042 | RDH11     | 1.028272675 | 0.04878285  |
| ENSG00000127418 | FGFRL1    | 1.028284708 | 0.045662801 |
| ENSG00000131389 | SLC6A6    | 1.028287086 | 0.001933368 |
| ENSG00000172757 | CFL1      | 1.028287095 | 0.001026714 |
| ENSG00000134815 | DHX34     | 1.028399006 | 0.010890435 |
| ENSG00000088247 | KHSRP     | 1.028407738 | 0.004576138 |
| ENSG00000103599 | IQCH      | 1.028441534 | 0.004714884 |
| ENSG00000066044 | ELAVL1    | 1.028485262 | 0.037475526 |
| ENSG00000134851 | TMEM165   | 1.028500584 | 0.035211326 |
| ENSG00000146066 | HIGD2A    | 1.028523354 | 0.034732075 |
| ENSG00000100884 | CPNE6     | 1.02855173  | 0.024311052 |
| ENSG00000163946 | FAM208A   | 1.02855296  | 0.00157509  |
| ENSG00000116198 | CEP104    | 1.02858011  | 0.033702956 |
| ENSG00000159199 | ATP5G1    | 1.02861227  | 0.007584825 |
| ENSG00000138735 | PDE5A     | 1.028617065 | 0.015266772 |
| ENSG00000160563 | MED27     | 1.028627132 | 0.019372849 |
| ENSG00000104825 | NFKBIB    | 1.028675927 | 0.035658931 |
| ENSG00000180626 | ZNF594    | 1.028707632 | 0.002427484 |
| ENSG00000124216 | SNAI1     | 1.028719668 | 0.035591343 |
| ENSG00000134490 | TMEM241   | 1.028719963 | 0.0312841   |
| ENSG00000117691 | NENF      | 1.028782132 | 0.029213409 |
| ENSG00000130997 | POLN      | 1.028821209 | 0.03931833  |
| ENSG00000183283 | DAZAP2    | 1.028907072 | 0.037076602 |
| ENSG00000176274 | SLC25A53  | 1.028913895 | 0.03438086  |
| ENSG00000174720 | LARP7     | 1.028925374 | 0.042596899 |
| ENSG00000169432 | SCN9A     | 1.028945866 | 0.024899614 |
| ENSG00000152683 | SLC30A6   | 1.028981237 | 0.006986812 |
| ENSG00000162944 | RFTN2     | 1.028984308 | 0.015409551 |
| ENSG00000131368 | MRPS25    | 1.029061344 | 0.01160034  |
| ENSG00000105341 | ATP5SL    | 1.029117035 | 0.007565974 |

|                 |           |             |             |
|-----------------|-----------|-------------|-------------|
| ENSG00000144677 | CTDSPL    | 1.029118761 | 0.009810563 |
| ENSG00000127452 | FBXL12    | 1.029138535 | 0.000845267 |
| ENSG00000189159 | HN1       | 1.029190199 | 0.030941323 |
| ENSG00000167716 | WDR81     | 1.029223053 | 0.005826405 |
| ENSG00000141294 | LRRC46    | 1.029265722 | 0.021266966 |
| ENSG00000189043 | NDUFA4    | 1.029342836 | 0.003439362 |
| ENSG00000169189 | NSMCE1    | 1.0293775   | 0.029099587 |
| ENSG00000103043 | VAC14     | 1.029535545 | 0.022841828 |
| ENSG00000156261 | CCT8      | 1.029543158 | 0.021384055 |
| ENSG00000101460 | MAP1LC3A  | 1.029560052 | 0.012971882 |
| ENSG00000141867 | BRD4      | 1.029593011 | 0.020311058 |
| ENSG00000196141 | SPATS2L   | 1.029605599 | 0.008098788 |
| ENSG00000159374 | M1AP      | 1.029669342 | 0.012241393 |
| ENSG00000146426 | TIAM2     | 1.029742947 | 0.028070757 |
| ENSG00000175334 | BANF1     | 1.029823921 | 0.021918989 |
| ENSG00000171443 | ZNF524    | 1.029876024 | 0.03259097  |
| ENSG00000072501 | SMC1A     | 1.029925738 | 0.019561314 |
| ENSG00000179403 | VWA1      | 1.029926994 | 0.014167682 |
| ENSG00000111834 | RSPH4A    | 1.029932542 | 0.011211292 |
| ENSG00000178694 | NSUN3     | 1.029956202 | 0.016400782 |
| ENSG00000100632 | ERH       | 1.02997897  | 0.018567964 |
| ENSG00000138073 | PREB      | 1.029997809 | 0.026714791 |
| ENSG00000074266 | EED       | 1.030022456 | 0.018178552 |
| ENSG00000168175 | MAPK1IP1L | 1.030040664 | 0.008146143 |
| ENSG00000124733 | MEA1      | 1.030048425 | 0.039756126 |
| ENSG00000112576 | CCND3     | 1.03014875  | 0.018554039 |
| ENSG00000133424 | LARGE     | 1.030172779 | 0.006047671 |
| ENSG00000163872 | YEATS2    | 1.030174079 | 0.00060277  |
| ENSG00000160584 | SIK3      | 1.030191243 | 0.048129974 |
| ENSG00000072864 | NDE1      | 1.030245178 | 0.006039128 |
| ENSG00000176746 | MAGEB6    | 1.030270107 | 0.006279933 |
| ENSG00000100266 | PACSIN2   | 1.030302909 | 0.023657168 |
| ENSG00000122026 | RPL21     | 1.03030387  | 0.004089866 |
| ENSG00000148358 | GPR107    | 1.030312707 | 0.024902305 |
| ENSG00000104375 | STK3      | 1.030315778 | 0.016688169 |
| ENSG00000160953 | MUM1      | 1.030326354 | 0.020409695 |
| ENSG00000248383 | PCDHAC1   | 1.030335838 | 0.006474253 |
| ENSG00000029363 | BCLAF1    | 1.030343706 | 0.00486322  |
| ENSG00000160714 | UBE2Q1    | 1.030350148 | 0.036813041 |
| ENSG00000171311 | EXOSC1    | 1.03039505  | 0.021644857 |
| ENSG00000147548 | WHSC1L1   | 1.030406461 | 0.011230426 |
| ENSG00000107223 | EDF1      | 1.030432925 | 0.003979774 |
| ENSG00000131591 | C1orf159  | 1.03045072  | 0.022344489 |
| ENSG00000178982 | EIF3K     | 1.03050885  | 0.003428786 |
| ENSG00000123444 | KBTBD4    | 1.030515005 | 0.026674398 |
| ENSG00000160691 | SHC1      | 1.030521553 | 0.02173003  |
| ENSG00000159692 | CTBP1     | 1.030562724 | 0.009878174 |

|                 |           |             |             |
|-----------------|-----------|-------------|-------------|
| ENSG00000105058 | FAM32A    | 1.030619483 | 0.024991551 |
| ENSG00000135441 | BLOC1S1   | 1.030630291 | 0.024341819 |
| ENSG00000204536 | CCHCR1    | 1.030686477 | 0.015846776 |
| ENSG00000116852 | KIF21B    | 1.030689382 | 0.017782262 |
| ENSG00000101161 | PRPF6     | 1.030711178 | 0.02892826  |
| ENSG00000083838 | ZNF446    | 1.030722864 | 0.00134372  |
| ENSG00000179933 | C14orf119 | 1.030742616 | 0.004544235 |
| ENSG00000213593 | TMX2      | 1.030803047 | 0.041555251 |
| ENSG00000069248 | NUP133    | 1.030846922 | 0.012491197 |
| ENSG00000162624 | LHX8      | 1.030851683 | 0.009541138 |
| ENSG00000184809 | C21orf88  | 1.030874271 | 0.030100311 |
| ENSG00000117501 | MROH9     | 1.03089955  | 0.042262344 |
| ENSG00000099821 | POLRMT    | 1.030928119 | 0.005233852 |
| ENSG00000160049 | DFFA      | 1.030953279 | 0.00242724  |
| ENSG00000167526 | RPL13     | 1.030966169 | 0.003518758 |
| ENSG00000197157 | SND1      | 1.031010182 | 0.016571818 |
| ENSG00000180423 | HARBI1    | 1.031072809 | 0.038008613 |
| ENSG00000229809 | ZNF688    | 1.031077427 | 0.001405002 |
| ENSG00000153187 | HNRNPU    | 1.03114575  | 0.000834863 |
| ENSG00000144231 | POLR2D    | 1.031185428 | 0.013402135 |
| ENSG00000101442 | ACTR5     | 1.03121376  | 0.01029779  |
| ENSG00000131263 | RLIM      | 1.031215106 | 0.035659747 |
| ENSG00000167302 | ENTHD2    | 1.031291425 | 0.019684016 |
| ENSG00000183386 | FHL3      | 1.031314982 | 0.007956069 |
| ENSG00000206052 | DOK6      | 1.031328335 | 0.007394254 |
| ENSG00000147606 | SLC26A7   | 1.031330507 | 0.019822756 |
| ENSG00000115806 | GORASP2   | 1.031347157 | 0.000913412 |
| ENSG00000170866 | LILRA3    | 1.031348267 | 0.008628434 |
| ENSG00000025770 | NCAPH2    | 1.031514667 | 0.006214445 |
| ENSG00000147677 | EIF3H     | 1.031524276 | 0.038399936 |
| ENSG00000129625 | REEP5     | 1.0315327   | 0.000854329 |
| ENSG00000101290 | CDS2      | 1.031545088 | 0.006763523 |
| ENSG00000130764 | LRRC47    | 1.0315585   | 0.003193954 |
| ENSG00000126746 | ZNF384    | 1.031563471 | 0.000136424 |
| ENSG00000115020 | PIKFYVE   | 1.031567998 | 0.014264799 |
| ENSG00000188817 | SNTN      | 1.031597074 | 0.023514375 |
| ENSG00000100811 | YY1       | 1.031674976 | 0.003078441 |
| ENSG00000185842 | DNAH14    | 1.031681493 | 0.001533592 |
| ENSG00000131067 | GGT7      | 1.031727693 | 0.041611035 |
| ENSG00000105771 | SMG9      | 1.031731684 | 4.61E-05    |
| ENSG00000174446 | SNAPC5    | 1.031733491 | 0.035690447 |
| ENSG00000182168 | UNC5C     | 1.031741714 | 0.004449619 |
| ENSG00000139687 | RB1       | 1.031786546 | 0.021145336 |
| ENSG00000163362 | C1orf106  | 1.03180806  | 0.010299682 |
| ENSG00000085185 | BCORL1    | 1.031831049 | 0.000165483 |
| ENSG00000215883 | CYB5RL    | 1.031862019 | 0.022447514 |
| ENSG00000149311 | ATM       | 1.031896933 | 0.028765169 |

|                 |           |             |             |
|-----------------|-----------|-------------|-------------|
| ENSG00000164919 | COX6C     | 1.031950263 | 0.002911916 |
| ENSG00000069966 | GNB5      | 1.032022712 | 0.028186724 |
| ENSG00000152127 | MGAT5     | 1.032071553 | 0.013631123 |
| ENSG00000142002 | DPP9      | 1.032124343 | 0.00135708  |
| ENSG00000141499 | WRAP53    | 1.032243802 | 0.026933299 |
| ENSG00000064545 | TMEM161A  | 1.032273755 | 0.035470988 |
| ENSG00000110107 | PRPF19    | 1.032282288 | 0.049349156 |
| ENSG00000135144 | DTX1      | 1.032303115 | 0.043896459 |
| ENSG00000131042 | LILRB2    | 1.032306713 | 0.011664448 |
| ENSG00000160131 | VMA21     | 1.032310255 | 0.031706621 |
| ENSG00000132510 | KDM6B     | 1.032323297 | 0.020402875 |
| ENSG00000114416 | FXR1      | 1.03235339  | 0.034479705 |
| ENSG00000080189 | SLC35C2   | 1.032374567 | 0.00490892  |
| ENSG00000103145 | HCFC1R1   | 1.032405793 | 0.009003871 |
| ENSG00000173928 | SWSAP1    | 1.032436498 | 0.044183429 |
| ENSG00000133056 | PIK3C2B   | 1.032440438 | 0.013078892 |
| ENSG00000112320 | SOBP      | 1.032442702 | 0.010576598 |
| ENSG00000185418 | TARSL2    | 1.032500437 | 0.044701534 |
| ENSG00000037474 | NSUN2     | 1.032502659 | 0.021771755 |
| ENSG00000153531 | ADPRHL1   | 1.032517112 | 0.001368622 |
| ENSG00000156427 | FGF18     | 1.032519774 | 0.034654353 |
| ENSG00000135111 | TBX3      | 1.032544786 | 0.046109669 |
| ENSG00000008988 | RPS20     | 1.032556649 | 9.22E-05    |
| ENSG00000132286 | TIMM10B   | 1.032587656 | 0.044107288 |
| ENSG00000151779 | NBAS      | 1.032653289 | 0.014405296 |
| ENSG00000215305 | VPS16     | 1.032687231 | 0.032386099 |
| ENSG00000101361 | NOP56     | 1.032699283 | 0.005273133 |
| ENSG00000133107 | TRPC4     | 1.032736083 | 0.008463869 |
| ENSG00000070061 | IKBKAP    | 1.032744949 | 0.026191013 |
| ENSG00000124177 | CHD6      | 1.032765419 | 0.018412114 |
| ENSG00000162736 | NCSTN     | 1.032765942 | 0.038302401 |
| ENSG00000144029 | MRPS5     | 1.032820686 | 0.003656862 |
| ENSG00000130770 | ATPIF1    | 1.032824703 | 0.000891688 |
| ENSG00000175606 | TMEM70    | 1.032836821 | 0.015930954 |
| ENSG00000101146 | RAE1      | 1.032836891 | 0.042561494 |
| ENSG00000153107 | ANAPC1    | 1.032844849 | 0.006706556 |
| ENSG00000188938 | FAM120AOS | 1.032870301 | 0.015225964 |
| ENSG00000164576 | SAP30L    | 1.032882017 | 0.036690966 |
| ENSG00000168002 | POLR2G    | 1.032901368 | 0.000222383 |
| ENSG00000102898 | NUTF2     | 1.033011632 | 0.002090362 |
| ENSG00000198663 | C6orf89   | 1.033034604 | 0.007962414 |
| ENSG00000256590 | TRDV3     | 1.033164983 | 0.024889831 |
| ENSG00000168348 | INSM2     | 1.03316584  | 0.023337797 |
| ENSG00000197746 | PSAP      | 1.033183324 | 0.026687824 |
| ENSG00000181135 | ZNF707    | 1.033218893 | 0.011309541 |
| ENSG00000161544 | CYGB      | 1.033240008 | 0.007047824 |
| ENSG00000100802 | C14orf93  | 1.033253843 | 0.016148068 |

|                 |          |             |             |
|-----------------|----------|-------------|-------------|
| ENSG00000102158 | MAGT1    | 1.033268179 | 0.041985586 |
| ENSG00000141295 | SCRN2    | 1.033310873 | 0.03523625  |
| ENSG00000251192 | ZNF674   | 1.033331781 | 0.011011433 |
| ENSG00000076201 | PTPN23   | 1.033335664 | 0.002123606 |
| ENSG00000166086 | JAM3     | 1.033349616 | 0.042529006 |
| ENSG00000129204 | USP6     | 1.03337698  | 0.001373856 |
| ENSG00000188529 | SRSF10   | 1.033378062 | 0.045949406 |
| ENSG00000158292 | GPR153   | 1.033382479 | 0.039257974 |
| ENSG00000011132 | APBA3    | 1.033387607 | 0.037669912 |
| ENSG00000163638 | ADAMTS9  | 1.03340332  | 0.010994704 |
| ENSG00000158793 | NIT1     | 1.033412715 | 0.044809487 |
| ENSG00000144580 | RQCD1    | 1.033452853 | 0.020044154 |
| ENSG00000130348 | QRSL1    | 1.033484701 | 0.016315194 |
| ENSG00000162889 | MAPKAPK2 | 1.033507001 | 0.004584557 |
| ENSG00000152520 | PAN3     | 1.0335623   | 0.039074638 |
| ENSG00000141385 | AFG3L2   | 1.03356286  | 0.000672535 |
| ENSG00000162669 | HFM1     | 1.033568817 | 0.036341093 |
| ENSG00000037241 | RPL26L1  | 1.033588517 | 0.046530466 |
| ENSG00000131626 | PPFIA1   | 1.033598366 | 0.015856056 |
| ENSG00000157600 | TMEM164  | 1.033650179 | 0.035369894 |
| ENSG00000136040 | PLXNC1   | 1.033672265 | 0.016699964 |
| ENSG00000053524 | MCF2L2   | 1.033696428 | 0.019974428 |
| ENSG00000141946 | ZIM3     | 1.033712357 | 0.006467174 |
| ENSG00000121073 | SLC35B1  | 1.033792852 | 0.016020525 |
| ENSG00000110583 | NAA40    | 1.033793258 | 0.041320625 |
| ENSG00000109738 | GLRB     | 1.033799766 | 0.006667854 |
| ENSG00000076554 | TPD52    | 1.03388894  | 0.047097165 |
| ENSG00000166965 | RCCD1    | 1.033901618 | 0.020087053 |
| ENSG00000104415 | WISP1    | 1.033913653 | 0.00726757  |
| ENSG00000154485 | MMP21    | 1.033931823 | 0.02913974  |
| ENSG00000204568 | MRPS18B  | 1.033933472 | 0.022450855 |
| ENSG00000115282 | TTC31    | 1.033962097 | 0.030180401 |
| ENSG00000236882 | C5orf27  | 1.033976781 | 0.036599226 |
| ENSG00000105447 | GRWD1    | 1.033992097 | 0.0124068   |
| ENSG00000079102 | RUNX1T1  | 1.03401711  | 0.025553825 |
| ENSG00000160404 | TOR2A    | 1.034024547 | 0.016084796 |
| ENSG00000167685 | ZNF444   | 1.034028372 | 0.031500494 |
| ENSG00000157036 | EXOG     | 1.034045939 | 0.002847371 |
| ENSG00000150540 | HNMT     | 1.034116579 | 0.032184102 |
| ENSG00000130299 | GTPBP3   | 1.034146535 | 0.015482433 |
| ENSG00000168273 | SMIM4    | 1.034177291 | 0.038097398 |
| ENSG00000136448 | NMT1     | 1.034189583 | 0.002419957 |
| ENSG00000038219 | BOD1L1   | 1.034191677 | 0.032737516 |
| ENSG00000181092 | ADIPOQ   | 1.034219324 | 0.007665586 |
| ENSG00000106459 | NRF1     | 1.034233324 | 0.020775158 |
| ENSG00000168066 | SF1      | 1.034248991 | 0.02985304  |
| ENSG00000084093 | REST     | 1.034360282 | 0.000490934 |

|                 |            |             |             |
|-----------------|------------|-------------|-------------|
| ENSG00000122545 | 7-Sep      | 1.034413754 | 0.029280578 |
| ENSG00000128655 | PDE11A     | 1.034423251 | 0.002567658 |
| ENSG00000168827 | GFM1       | 1.034445877 | 0.035118543 |
| ENSG00000137218 | FRS3       | 1.034509943 | 0.01526536  |
| ENSG00000100605 | ITPK1      | 1.034522484 | 0.010908664 |
| ENSG00000126217 | MCF2L      | 1.034522591 | 0.000533935 |
| ENSG00000240857 | RDH14      | 1.03454727  | 0.047413565 |
| ENSG00000007952 | NOX1       | 1.03455333  | 0.041753467 |
| ENSG00000215021 | PHB2       | 1.034554929 | 0.03066766  |
| ENSG00000105617 | LENG1      | 1.034561702 | 0.014187697 |
| ENSG00000156928 | MALSU1     | 1.034585759 | 0.00322893  |
| ENSG00000136933 | RABEPK     | 1.034611635 | 0.012381107 |
| ENSG00000143140 | GJA5       | 1.034629503 | 0.022537022 |
| ENSG00000144224 | UBXN4      | 1.034637297 | 0.006300844 |
| ENSG00000196208 | GREB1      | 1.034692696 | 0.003158794 |
| ENSG00000101966 | XIAP       | 1.034703485 | 0.019686446 |
| ENSG00000125818 | PSMF1      | 1.034835372 | 0.017179118 |
| ENSG00000148734 | NPPFR1     | 1.03484442  | 0.049836597 |
| ENSG00000114554 | PLXNA1     | 1.034920685 | 5.15E-07    |
| ENSG00000160791 | CCR5       | 1.034957746 | 0.049015496 |
| ENSG00000131473 | ACLY       | 1.03496489  | 0.042258258 |
| ENSG00000142534 | RPS11      | 1.034967674 | 0.000395703 |
| ENSG00000081791 | KIAA0141   | 1.034972511 | 0.005361709 |
| ENSG00000167797 | CDK2AP2    | 1.034977763 | 0.031587137 |
| ENSG00000132470 | ITGB4      | 1.034980678 | 0.001600428 |
| ENSG00000142528 | ZNF473     | 1.035066198 | 0.033277822 |
| ENSG00000081692 | JMJD4      | 1.035096111 | 0.004351315 |
| ENSG00000106415 | GLCCI1     | 1.035102137 | 0.032585216 |
| ENSG00000128731 | HERC2      | 1.035133203 | 0.009860917 |
| ENSG00000176601 | MAP3K19    | 1.035138417 | 0.021261612 |
| ENSG00000137076 | TLN1       | 1.03519779  | 0.025326436 |
| ENSG00000023228 | NDUFS1     | 1.03525905  | 0.043782192 |
| ENSG00000135414 | GDF11      | 1.035262065 | 0.004863402 |
| ENSG00000249852 | AC145676.2 | 1.035308866 | 0.008003043 |
| ENSG00000173535 | TNFRSF10C  | 1.035331702 | 0.036541102 |
| ENSG00000058673 | ZC3H11A    | 1.035348042 | 0.004723326 |
| ENSG00000131914 | LIN28A     | 1.03537513  | 0.02393743  |
| ENSG00000255103 | KIAA0754   | 1.035389681 | 0.037744119 |
| ENSG00000146223 | RPL7L1     | 1.035392943 | 0.005396082 |
| ENSG00000166166 | TRMT61A    | 1.035461591 | 3.37E-05    |
| ENSG00000101412 | E2F1       | 1.035465304 | 0.016813441 |
| ENSG00000143442 | POGZ       | 1.035468201 | 0.031242784 |
| ENSG00000170776 | AKAP13     | 1.035469563 | 0.041723069 |
| ENSG00000099617 | EFNA2      | 1.035544269 | 0.03788047  |
| ENSG00000130733 | YIPF2      | 1.035555469 | 0.012295095 |
| ENSG00000071626 | DAZAP1     | 1.035586495 | 0.019687053 |
| ENSG00000111087 | GLI1       | 1.035621849 | 0.013065378 |

|                 |             |             |             |
|-----------------|-------------|-------------|-------------|
| ENSG00000104047 | DTWD1       | 1.035673031 | 0.026300879 |
| ENSG00000074621 | SLC24A1     | 1.035675166 | 0.010548602 |
| ENSG00000101856 | PGRMC1      | 1.03569431  | 0.019177719 |
| ENSG00000113194 | FAF2        | 1.035698608 | 0.020691341 |
| ENSG00000106153 | CHCHD2      | 1.035704672 | 0.010654731 |
| ENSG00000006715 | VPS41       | 1.035711384 | 0.033863128 |
| ENSG00000144824 | PHLDB2      | 1.035738335 | 0.028902405 |
| ENSG00000217442 | SYCE3       | 1.035796793 | 0.049838857 |
| ENSG00000179271 | GADD45GIP1  | 1.035804954 | 0.002917515 |
| ENSG00000073578 | SDHA        | 1.035833899 | 0.035489463 |
| ENSG00000100281 | HMGXB4      | 1.035853342 | 0.0024874   |
| ENSG00000265096 | C1QTNF1-AS1 | 1.035890488 | 0.032503517 |
| ENSG00000125633 | CCDC93      | 1.035902169 | 0.035207624 |
| ENSG00000120314 | WDR55       | 1.035920871 | 0.010965142 |
| ENSG00000105948 | TTC26       | 1.035947689 | 0.0225784   |
| ENSG00000134014 | ELP3        | 1.035986924 | 0.011495078 |
| ENSG00000183605 | SFXN4       | 1.035989603 | 0.012401736 |
| ENSG00000169976 | SF3B5       | 1.035990437 | 0.030393755 |
| ENSG00000159307 | SCUBE1      | 1.036007622 | 0.029503521 |
| ENSG00000161981 | SNRNP25     | 1.036011051 | 0.036737073 |
| ENSG00000184432 | COPB2       | 1.036038074 | 0.008002741 |
| ENSG00000133639 | BTG1        | 1.036038138 | 0.047599535 |
| ENSG00000068323 | TFE3        | 1.036047333 | 0.000239793 |
| ENSG00000153093 | ACOXL       | 1.036065162 | 0.005488441 |
| ENSG00000107758 | PPP3CB      | 1.036096374 | 0.04778208  |
| ENSG00000144233 | AMMECR1L    | 1.036114698 | 0.013630562 |
| ENSG00000142319 | SLC6A3      | 1.036127656 | 0.0222819   |
| ENSG00000138032 | PPM1B       | 1.036152326 | 0.002105727 |
| ENSG00000068784 | SRBD1       | 1.03617479  | 0.018742526 |
| ENSG00000164182 | NDUFAF2     | 1.036175487 | 0.027401504 |
| ENSG00000176472 | ZNF575      | 1.036235527 | 0.009933762 |
| ENSG00000114544 | SLC41A3     | 1.036262471 | 0.011218917 |
| ENSG00000151116 | UEVLD       | 1.036263029 | 0.027111119 |
| ENSG00000108588 | CCDC47      | 1.036263194 | 0.022101154 |
| ENSG00000065989 | PDE4A       | 1.036267791 | 0.007926901 |
| ENSG00000184735 | DDX53       | 1.03627743  | 0.004629814 |
| ENSG00000073050 | XRCC1       | 1.036284746 | 0.046997504 |
| ENSG00000071082 | RPL31       | 1.036290186 | 0.039842589 |
| ENSG00000129351 | ILF3        | 1.036298914 | 0.035588892 |
| ENSG00000095752 | IL11        | 1.036373412 | 0.011408601 |
| ENSG00000166451 | CENPN       | 1.036419134 | 0.016608715 |
| ENSG00000163746 | PLSCR2      | 1.036430959 | 0.016022353 |
| ENSG00000198522 | GPN1        | 1.036448283 | 0.029682157 |
| ENSG00000154529 | CNTNAP3B    | 1.036456655 | 0.010810524 |
| ENSG00000148399 | DPH7        | 1.036497701 | 0.037900544 |
| ENSG00000108784 | NAGLU       | 1.036504938 | 0.047644595 |
| ENSG00000101182 | PSMA7       | 1.036509788 | 0.007989978 |

|                 |         |             |             |
|-----------------|---------|-------------|-------------|
| ENSG00000101160 | CTSZ    | 1.036545049 | 0.0242735   |
| ENSG00000136827 | TOR1A   | 1.036550256 | 0.006959816 |
| ENSG00000213077 | FAM106A | 1.036570945 | 0.03222158  |
| ENSG00000099331 | MYO9B   | 1.036576827 | 0.00069474  |
| ENSG00000143933 | CALM2   | 1.036581416 | 1.35E-06    |
| ENSG00000170959 | DCDC1   | 1.036595271 | 0.02800388  |
| ENSG00000165084 | C8orf34 | 1.036626452 | 0.016392542 |
| ENSG00000115042 | FAHD2A  | 1.036637536 | 0.00092312  |
| ENSG00000196814 | MVB12B  | 1.036646621 | 0.001099956 |
| ENSG00000120798 | NR2C1   | 1.036648139 | 0.033524943 |
| ENSG00000051382 | PIK3CB  | 1.036651024 | 0.038142209 |
| ENSG00000160050 | CCDC28B | 1.036656307 | 0.04371847  |
| ENSG00000115339 | GALNT3  | 1.036688375 | 0.00883468  |
| ENSG00000007047 | MARK4   | 1.036727774 | 0.004912884 |
| ENSG00000169410 | PTPN9   | 1.036736478 | 0.003031763 |
| ENSG00000155506 | LARP1   | 1.036760324 | 0.012988164 |
| ENSG00000138413 | IDH1    | 1.036804134 | 0.022862437 |
| ENSG00000089053 | ANAPC5  | 1.036808085 | 0.001747436 |
| ENSG00000065000 | AP3D1   | 1.036827414 | 0.005782053 |
| ENSG00000122507 | BBS9    | 1.036837061 | 0.03700622  |
| ENSG00000152022 | LIX1L   | 1.036842514 | 0.010131761 |
| ENSG00000126733 | DACH2   | 1.036845953 | 0.023115058 |
| ENSG00000167037 | SGSM1   | 1.03684624  | 0.017333035 |
| ENSG00000159202 | UBE2Z   | 1.036908708 | 0.006935438 |
| ENSG00000140718 | FTO     | 1.03703278  | 0.000603928 |
| ENSG00000107521 | HPS1    | 1.037114818 | 0.00010792  |
| ENSG00000142556 | ZNF614  | 1.037117825 | 0.042714836 |
| ENSG00000162267 | ITIH3   | 1.037123518 | 0.04942509  |
| ENSG00000142330 | CAPN10  | 1.037173427 | 0.009451255 |
| ENSG00000132254 | ARFIP2  | 1.037210906 | 0.045205746 |
| ENSG00000174915 | PTDSS2  | 1.037239617 | 0.029440227 |
| ENSG00000175832 | ETV4    | 1.037288113 | 0.009409351 |
| ENSG00000189114 | BLOC1S3 | 1.037312969 | 0.004167259 |
| ENSG00000166295 | ANAPC16 | 1.037329067 | 0.000624656 |
| ENSG00000176386 | CDC26   | 1.037336773 | 0.031080295 |
| ENSG00000171148 | TADA3   | 1.037340724 | 0.003217104 |
| ENSG00000169136 | ATF5    | 1.037342357 | 0.007570687 |
| ENSG00000136986 | DERL1   | 1.037349136 | 0.034180782 |
| ENSG00000267855 | NDUFA7  | 1.037418326 | 0.034955378 |
| ENSG00000061936 | SFSWAP  | 1.037457066 | 0.005188065 |
| ENSG00000129515 | SNX6    | 1.037468418 | 0.031139593 |
| ENSG00000163424 | C3orf30 | 1.03754608  | 0.018034675 |
| ENSG00000163492 | CCDC141 | 1.037573555 | 0.018344149 |
| ENSG00000128699 | ORMDL1  | 1.037684861 | 0.016385938 |
| ENSG00000113600 | C9      | 1.037734509 | 0.022203619 |
| ENSG00000133265 | HSPBP1  | 1.037741661 | 0.037694711 |
| ENSG00000188107 | EYS     | 1.037765178 | 0.021608868 |

|                 |          |             |             |
|-----------------|----------|-------------|-------------|
| ENSG00000150636 | CCDC102B | 1.037767612 | 0.028679694 |
| ENSG00000172943 | PHF8     | 1.037831156 | 0.023926282 |
| ENSG00000110076 | NRXN2    | 1.037843701 | 0.017528302 |
| ENSG00000154153 | FAM134B  | 1.03786848  | 0.022957395 |
| ENSG00000008130 | NADK     | 1.037869603 | 0.003495731 |
| ENSG00000092010 | PSME1    | 1.037878339 | 0.004654903 |
| ENSG00000241058 | NSUN6    | 1.037915985 | 0.040709069 |
| ENSG00000141367 | CLTC     | 1.037943276 | 0.048355581 |
| ENSG00000204669 | C9orf57  | 1.037948443 | 0.032386738 |
| ENSG00000198874 | TYW1     | 1.037955366 | 0.042317014 |
| ENSG00000115233 | PSMD14   | 1.037964278 | 0.00488922  |
| ENSG00000145495 | 6-Mar    | 1.038013747 | 0.004020486 |
| ENSG00000125944 | HNRNPR   | 1.038045027 | 0.002052674 |
| ENSG00000135454 | B4GALNT1 | 1.038056487 | 0.0009679   |
| ENSG00000189403 | HMGB1    | 1.038090364 | 0.000180071 |
| ENSG00000084073 | ZMPSTE24 | 1.038092963 | 0.01256648  |
| ENSG00000138867 | GUCD1    | 1.038159863 | 0.037894553 |
| ENSG00000165105 | RASEF    | 1.038186888 | 0.020291513 |
| ENSG00000116957 | TBCE     | 1.03820543  | 0.045474013 |
| ENSG00000116521 | SCAMP3   | 1.038221308 | 0.008758888 |
| ENSG00000150316 | CWC15    | 1.038247463 | 0.029495332 |
| ENSG00000122420 | PTGFR    | 1.038248674 | 0.004849149 |
| ENSG00000143751 | SDE2     | 1.038333847 | 0.027630992 |
| ENSG00000165724 | ZMYND19  | 1.038360576 | 0.01041295  |
| ENSG00000159216 | RUNX1    | 1.038395804 | 0.003773657 |
| ENSG00000117020 | AKT3     | 1.038406958 | 0.008011299 |
| ENSG00000115252 | PDE1A    | 1.038458861 | 0.001763206 |
| ENSG00000205937 | RNPS1    | 1.038468872 | 0.030157078 |
| ENSG00000183914 | DNAH2    | 1.038486228 | 0.034122678 |
| ENSG00000213024 | NUP62    | 1.038494849 | 0.001124243 |
| ENSG00000132591 | ERAL1    | 1.03851121  | 0.04500891  |
| ENSG00000181450 | ZNF678   | 1.038550471 | 0.000473278 |
| ENSG00000186908 | ZDHC17   | 1.038580385 | 0.029089241 |
| ENSG00000132661 | NXT1     | 1.038591956 | 0.048953265 |
| ENSG00000185250 | PPIL6    | 1.038593467 | 0.018494699 |
| ENSG00000135778 | NTPCR    | 1.038611599 | 0.010467078 |
| ENSG00000124786 | SLC35B3  | 1.038616539 | 0.001930987 |
| ENSG00000138085 | ATRAID   | 1.038666076 | 0.001241217 |
| ENSG00000099901 | RANBP1   | 1.038667368 | 0.005205491 |
| ENSG00000196290 | NIF3L1   | 1.038674501 | 0.000900091 |
| ENSG00000101363 | MANBAL   | 1.038710104 | 0.005877925 |
| ENSG00000100591 | AHSA1    | 1.038723461 | 0.03229419  |
| ENSG00000163608 | C3orf17  | 1.038782414 | 0.000658461 |
| ENSG00000236624 | CCDC163P | 1.038807846 | 0.001470909 |
| ENSG00000041988 | THAP3    | 1.038833705 | 0.003477421 |
| ENSG00000172500 | FIBP     | 1.038839814 | 0.012936647 |
| ENSG00000100029 | PES1     | 1.038903581 | 0.017126532 |

|                 |               |             |             |
|-----------------|---------------|-------------|-------------|
| ENSG00000132879 | FBXO44        | 1.038951787 | 0.031610204 |
| ENSG00000188428 | BLOC1S5       | 1.038977404 | 0.004233602 |
| ENSG00000104312 | RIPK2         | 1.038982391 | 0.01501126  |
| ENSG00000180376 | CCDC66        | 1.039005996 | 0.015862863 |
| ENSG00000102871 | TRADD         | 1.039013647 | 0.002428353 |
| ENSG00000020129 | NCDN          | 1.039025801 | 2.89E-05    |
| ENSG00000163913 | IFT122        | 1.039025901 | 0.023469672 |
| ENSG00000167157 | PRRX2         | 1.039051666 | 0.010823684 |
| ENSG00000178921 | PFAS          | 1.039069579 | 0.045096771 |
| ENSG00000012061 | ERCC1         | 1.039086175 | 0.008615301 |
| ENSG00000119121 | TRPM6         | 1.039123206 | 0.035099467 |
| ENSG00000103540 | CCP110        | 1.03913866  | 0.009677997 |
| ENSG00000154229 | PRKCA         | 1.039156012 | 0.016983899 |
| ENSG00000163515 | RETNLB        | 1.039165927 | 0.025198414 |
| ENSG00000198799 | LRIG2         | 1.039204266 | 0.002996636 |
| ENSG00000160345 | C9orf116      | 1.039204522 | 0.011284808 |
| ENSG00000105053 | VRK3          | 1.039222672 | 0.016358156 |
| ENSG00000257743 | RP11-1220K2.2 | 1.039226246 | 0.038754189 |
| ENSG00000164880 | INTS1         | 1.039227428 | 0.003150738 |
| ENSG00000164823 | OSGIN2        | 1.039230153 | 0.003435484 |
| ENSG00000096070 | BRPF3         | 1.039251392 | 0.002558061 |
| ENSG00000229676 | ZNF492        | 1.039286167 | 0.030664756 |
| ENSG00000113328 | CCNG1         | 1.039378897 | 0.027689187 |
| ENSG00000125755 | SYMPK         | 1.039390442 | 0.034896435 |
| ENSG00000132702 | HAPLN2        | 1.039393337 | 0.002925554 |
| ENSG00000171564 | FGB           | 1.039467823 | 0.012152834 |
| ENSG00000130520 | LSM4          | 1.039480824 | 0.045535813 |
| ENSG00000156697 | UTP14A        | 1.039481276 | 0.047107372 |
| ENSG00000100814 | CCNB1IP1      | 1.039492145 | 0.046583553 |
| ENSG00000139641 | ESYT1         | 1.0395729   | 0.015992862 |
| ENSG00000185104 | FAF1          | 1.039612961 | 0.000407876 |
| ENSG00000162999 | DUSP19        | 1.039619606 | 0.0034628   |
| ENSG00000196305 | IARS          | 1.039675778 | 0.003571683 |
| ENSG00000137073 | UBAP2         | 1.039682796 | 0.031742374 |
| ENSG00000143776 | CDC42BPA      | 1.039693831 | 0.018787214 |
| ENSG00000120509 | PDZD11        | 1.039702541 | 0.01895766  |
| ENSG00000074201 | CLNS1A        | 1.039710133 | 0.033818198 |
| ENSG00000188542 | DUSP28        | 1.03971245  | 0.026501121 |
| ENSG00000145041 | VPRBP         | 1.039745148 | 0.001806548 |
| ENSG00000027847 | B4GALT7       | 1.039776069 | 0.023761453 |
| ENSG00000067369 | TP53BP1       | 1.039776331 | 0.004633211 |
| ENSG00000181915 | ADO           | 1.03977657  | 0.022871095 |
| ENSG00000161057 | PSMC2         | 1.039816968 | 0.018151003 |
| ENSG00000038945 | MSR1          | 1.039826383 | 0.001957876 |
| ENSG00000137210 | TMEM14B       | 1.039856948 | 0.011949737 |
| ENSG00000075856 | SART3         | 1.039859078 | 0.000478717 |
| ENSG00000099985 | OSM           | 1.039859162 | 0.019547827 |

|                 |         |             |             |
|-----------------|---------|-------------|-------------|
| ENSG00000129946 | SHC2    | 1.039862921 | 0.047556486 |
| ENSG00000173597 | SULT1B1 | 1.039889001 | 0.026123178 |
| ENSG00000106086 | PLEKHA8 | 1.039912598 | 0.000215738 |
| ENSG00000070444 | MNT     | 1.039933401 | 0.001507163 |
| ENSG00000124160 | NCOA5   | 1.039936181 | 0.002825752 |
| ENSG00000124193 | SRSF6   | 1.039936387 | 0.033775826 |
| ENSG00000131174 | COX7B   | 1.039937721 | 0.033081495 |
| ENSG00000118655 | DCLRE1B | 1.039943702 | 0.043432835 |
| ENSG00000166188 | ZNF319  | 1.039951628 | 0.017397042 |
| ENSG00000151338 | MIPOL1  | 1.0399786   | 0.014390832 |
| ENSG00000067334 | DNTTIP2 | 1.03998129  | 0.001378561 |
| ENSG00000124508 | BTN2A2  | 1.039986689 | 0.002181193 |
| ENSG00000174791 | RIN1    | 1.039990515 | 0.04224134  |
| ENSG00000156194 | PPEF2   | 1.03999628  | 0.03065554  |
| ENSG00000177600 | RPLP2   | 1.040056991 | 0.001975077 |
| ENSG00000104973 | MED25   | 1.040075398 | 0.035774985 |
| ENSG00000123562 | MORF4L2 | 1.040076449 | 0.011923019 |
| ENSG00000005421 | PON1    | 1.040092774 | 0.046389404 |
| ENSG00000144130 | NT5DC4  | 1.040106753 | 0.03492852  |
| ENSG00000158987 | RAPGEF6 | 1.040190312 | 0.003409173 |
| ENSG00000111231 | GPN3    | 1.040196018 | 0.040248003 |
| ENSG00000108256 | NUFIP2  | 1.040209019 | 0.006669574 |
| ENSG00000132581 | SDF2    | 1.040224339 | 0.040677052 |
| ENSG00000105639 | JAK3    | 1.040242527 | 0.00011988  |
| ENSG00000137177 | KIF13A  | 1.040321988 | 0.040221086 |
| ENSG00000136937 | NCBP1   | 1.040351073 | 0.012731074 |
| ENSG00000184924 | PTRHD1  | 1.040379492 | 0.019021288 |
| ENSG00000077312 | SNRPA   | 1.040383271 | 0.043086618 |
| ENSG00000213865 | C8orf44 | 1.040390725 | 0.038370116 |
| ENSG00000137674 | MMP20   | 1.040403432 | 0.009452658 |
| ENSG00000111696 | NT5DC3  | 1.040418571 | 0.001061029 |
| ENSG00000128000 | ZNF780B | 1.040423408 | 0.000475308 |
| ENSG00000159322 | ADPGK   | 1.04043964  | 0.008004778 |
| ENSG00000082196 | C1QTNF3 | 1.040451101 | 0.015837069 |
| ENSG00000152082 | MZT2B   | 1.040456932 | 2.50E-05    |
| ENSG00000128626 | MRPS12  | 1.040463245 | 0.000138033 |
| ENSG00000181638 | ZFP41   | 1.040473394 | 0.001674413 |
| ENSG00000130175 | PRKCSH  | 1.040477391 | 0.000723336 |
| ENSG00000106245 | BUD31   | 1.040544281 | 0.032767695 |
| ENSG00000168264 | IRF2BP2 | 1.04054448  | 0.000270623 |
| ENSG00000186001 | LRCH3   | 1.040578641 | 0.00018245  |
| ENSG00000155090 | KLF10   | 1.040583397 | 0.030081286 |
| ENSG00000131115 | ZNF227  | 1.040595221 | 0.02959889  |
| ENSG00000114956 | DGUOK   | 1.040596906 | 0.032695324 |
| ENSG00000089280 | FUS     | 1.04060482  | 0.012599655 |
| ENSG00000100599 | RIN3    | 1.040606626 | 0.002559712 |
| ENSG00000183077 | AFMID   | 1.04063392  | 0.021592031 |

|                 |          |             |             |
|-----------------|----------|-------------|-------------|
| ENSG00000138297 | TIMM23   | 1.040648818 | 0.00291847  |
| ENSG00000175505 | CLCF1    | 1.040671353 | 0.027083641 |
| ENSG00000159352 | PSMD4    | 1.04068709  | 0.004892945 |
| ENSG00000138182 | KIF20B   | 1.040698496 | 0.045366202 |
| ENSG00000120158 | RCL1     | 1.040700921 | 0.012123689 |
| ENSG00000136003 | ISCU     | 1.040704915 | 0.000254349 |
| ENSG00000137337 | MDC1     | 1.040727049 | 0.034843265 |
| ENSG00000184845 | DRD1     | 1.040763638 | 0.027558605 |
| ENSG00000125450 | NUP85    | 1.040774357 | 0.039397212 |
| ENSG00000128713 | HOXD11   | 1.040779942 | 0.005015392 |
| ENSG00000089006 | SNX5     | 1.040802352 | 0.048589249 |
| ENSG00000178950 | GAK      | 1.040811358 | 0.033807393 |
| ENSG00000198822 | GRM3     | 1.040817604 | 0.027548978 |
| ENSG00000167562 | ZNF701   | 1.040848181 | 0.028556597 |
| ENSG00000132950 | ZMYM5    | 1.040853698 | 0.034356234 |
| ENSG00000130762 | ARHGEF16 | 1.040878577 | 0.027859513 |
| ENSG00000129315 | CCNT1    | 1.040878998 | 0.018350798 |
| ENSG00000153066 | TXNDC11  | 1.040911484 | 0.044210986 |
| ENSG00000167280 | ENGASE   | 1.040930454 | 0.028165748 |
| ENSG00000070761 | C16orf80 | 1.040952073 | 0.000609733 |
| ENSG00000171316 | CHD7     | 1.040959681 | 0.001453381 |
| ENSG00000254726 | MEX3A    | 1.040965023 | 0.002671122 |
| ENSG00000112782 | CLIC5    | 1.040986306 | 0.003349577 |
| ENSG00000156500 | FAM122C  | 1.041021496 | 0.033502924 |
| ENSG00000133275 | CSNK1G2  | 1.041024658 | 0.002476495 |
| ENSG00000138315 | OIT3     | 1.041094918 | 0.015947834 |
| ENSG00000242612 | DECR2    | 1.041177052 | 0.049785224 |
| ENSG00000152689 | RASGRP3  | 1.041179207 | 0.034788199 |
| ENSG00000121741 | ZMYM2    | 1.04118209  | 0.007348129 |
| ENSG00000079689 | SCGN     | 1.041202114 | 0.041587129 |
| ENSG00000204308 | RNF5     | 1.041249971 | 0.008234919 |
| ENSG00000134283 | PPHLN1   | 1.041263617 | 0.003835826 |
| ENSG00000137474 | MYO7A    | 1.041276616 | 0.004407285 |
| ENSG00000136152 | COG3     | 1.041279857 | 0.040477729 |
| ENSG00000065060 | UHRF1BP1 | 1.041303758 | 0.003622074 |
| ENSG00000125482 | TTF1     | 1.041319679 | 0.031203184 |
| ENSG00000198171 | DDRGK1   | 1.041321278 | 0.018639348 |
| ENSG00000171735 | CAMTA1   | 1.04133216  | 0.001705468 |
| ENSG00000182670 | TTC3     | 1.041344887 | 0.025837774 |
| ENSG00000019991 | HGF      | 1.041351648 | 4.46E-06    |
| ENSG00000087087 | SRRT     | 1.041363784 | 0.016669386 |
| ENSG00000177468 | OLIG3    | 1.041373011 | 0.00047365  |
| ENSG00000170537 | TMC7     | 1.041442544 | 0.010483208 |
| ENSG00000114030 | KPNA1    | 1.041449937 | 0.005730586 |
| ENSG00000139218 | SCAF11   | 1.041451153 | 0.000995829 |
| ENSG00000116138 | DNAJC16  | 1.041481969 | 0.000871258 |
| ENSG00000166126 | AMN      | 1.041506175 | 0.000905834 |

|                 |          |             |             |
|-----------------|----------|-------------|-------------|
| ENSG00000162949 | CAPN13   | 1.041510058 | 0.018083898 |
| ENSG00000166710 | B2M      | 1.041547691 | 0.009031894 |
| ENSG00000164307 | ERAP1    | 1.041561835 | 0.029678601 |
| ENSG00000165238 | WNK2     | 1.041564066 | 0.001261459 |
| ENSG00000111605 | CPSF6    | 1.041564862 | 0.018861373 |
| ENSG00000137547 | MRPL15   | 1.04157015  | 0.039810531 |
| ENSG00000254901 | MEF2BNB  | 1.041578232 | 0.002938787 |
| ENSG00000059573 | ALDH18A1 | 1.041581298 | 0.011033395 |
| ENSG00000147789 | ZNF7     | 1.041590434 | 1.86E-07    |
| ENSG00000101181 | MTG2     | 1.041614258 | 0.030640889 |
| ENSG00000100934 | SEC23A   | 1.041623845 | 0.029541445 |
| ENSG00000111837 | MAK      | 1.041626545 | 0.003200761 |
| ENSG00000113555 | PCDH12   | 1.041678423 | 0.000648465 |
| ENSG00000179912 | R3HDM2   | 1.041693237 | 0.004305636 |
| ENSG00000123737 | EXOSC9   | 1.041729724 | 0.009684203 |
| ENSG00000164118 | CEP44    | 1.041738889 | 0.026420887 |
| ENSG00000143436 | MRPL9    | 1.041795974 | 0.022986668 |
| ENSG00000113719 | ERGIC1   | 1.041836559 | 0.002923907 |
| ENSG00000125827 | TMX4     | 1.041846219 | 0.028391588 |
| ENSG00000179195 | ZNF664   | 1.041855169 | 0.007093204 |
| ENSG00000177383 | MAGEF1   | 1.041862558 | 0.022264887 |
| ENSG00000132305 | IMMT     | 1.04188051  | 0.000590598 |
| ENSG00000167397 | VKORC1   | 1.041920528 | 0.006140351 |
| ENSG00000184937 | WT1      | 1.041976378 | 0.011702656 |
| ENSG00000089159 | PXN      | 1.042038439 | 0.001939225 |
| ENSG00000172889 | EGFL7    | 1.042095501 | 0.022083055 |
| ENSG00000117481 | NSUN4    | 1.042107944 | 3.12E-05    |
| ENSG00000129158 | SERGEF   | 1.042109499 | 0.001339259 |
| ENSG00000124532 | MRS2     | 1.042220657 | 0.040068436 |
| ENSG00000117569 | PTBP2    | 1.04225613  | 0.009296946 |
| ENSG00000170906 | NDUFA3   | 1.042298677 | 0.000472752 |
| ENSG00000181264 | TMEM136  | 1.042328948 | 0.004985448 |
| ENSG00000177989 | ODF3B    | 1.042340825 | 0.011251588 |
| ENSG00000066654 | THUMPD1  | 1.042366747 | 0.008386206 |
| ENSG00000149136 | SSRP1    | 1.042368676 | 0.001743014 |
| ENSG00000105612 | DNASE2   | 1.042385574 | 0.019809034 |
| ENSG00000217128 | FNIP1    | 1.042389484 | 0.003803193 |
| ENSG00000183019 | C19orf59 | 1.042418399 | 0.021961203 |
| ENSG00000181852 | RNF41    | 1.042441126 | 0.001287366 |
| ENSG00000076924 | XAB2     | 1.042444439 | 0.013440844 |
| ENSG00000198626 | RYR2     | 1.042500957 | 0.007473396 |
| ENSG00000174628 | IQCK     | 1.042507311 | 0.009198245 |
| ENSG00000079387 | SENP1    | 1.042515149 | 0.006158097 |
| ENSG00000107816 | LZTS2    | 1.042516159 | 0.019158423 |
| ENSG00000106266 | SNX8     | 1.042526126 | 0.008980496 |
| ENSG00000120068 | HOXB8    | 1.042544442 | 0.001096221 |
| ENSG00000204592 | HLA-E    | 1.042563158 | 0.011199915 |

|                 |          |             |             |
|-----------------|----------|-------------|-------------|
| ENSG00000021762 | OSBPL5   | 1.042634691 | 0.032970781 |
| ENSG00000141480 | ARRB2    | 1.042660427 | 0.044347794 |
| ENSG00000142409 | ZNF787   | 1.042696369 | 0.020863806 |
| ENSG00000124570 | SERPINB6 | 1.042703547 | 0.02101647  |
| ENSG00000132749 | MTL5     | 1.042703939 | 0.007024857 |
| ENSG00000124243 | BCAS4    | 1.042705215 | 0.002320432 |
| ENSG00000135940 | COX5B    | 1.042714254 | 0.000139716 |
| ENSG00000113407 | TARS     | 1.042757807 | 0.041831626 |
| ENSG00000179950 | PUF60    | 1.042793864 | 0.012831831 |
| ENSG00000176204 | LRRTM4   | 1.042803724 | 0.001324029 |
| ENSG00000166548 | TK2      | 1.042821626 | 0.02424721  |
| ENSG00000113387 | SUB1     | 1.042824891 | 0.020345162 |
| ENSG00000126106 | TMEM53   | 1.042825523 | 0.032225499 |
| ENSG00000116161 | CACYBP   | 1.042842119 | 0.019356731 |
| ENSG00000168246 | UBTD2    | 1.042904668 | 0.000929223 |
| ENSG00000159140 | SON      | 1.042915512 | 1.32E-05    |
| ENSG00000169925 | BRD3     | 1.04293698  | 0.00156129  |
| ENSG00000115486 | GGCX     | 1.042978647 | 0.022251451 |
| ENSG00000198912 | C1orf174 | 1.042998809 | 0.000862871 |
| ENSG00000089057 | SLC23A2  | 1.043015011 | 0.016837276 |
| ENSG00000130731 | C16orf13 | 1.043045244 | 7.41E-05    |
| ENSG00000136068 | FLNB     | 1.043045427 | 0.030817888 |
| ENSG00000135108 | FBXO21   | 1.043045494 | 0.00218308  |
| ENSG00000187772 | LIN28B   | 1.043053969 | 0.022302256 |
| ENSG00000196411 | EPHB4    | 1.043054408 | 0.016671389 |
| ENSG00000204220 | PFDN6    | 1.043083712 | 0.018114988 |
| ENSG00000166685 | COG1     | 1.04310276  | 0.000166677 |
| ENSG00000149541 | B3GAT3   | 1.043107125 | 0.043377408 |
| ENSG00000115761 | NOL10    | 1.043111175 | 0.000119338 |
| ENSG00000103319 | EEF2K    | 1.043169575 | 0.021576444 |
| ENSG00000111331 | OAS3     | 1.043179546 | 0.03308927  |
| ENSG00000168758 | SEMA4C   | 1.043189138 | 0.012268917 |
| ENSG00000176208 | ATAD5    | 1.043190446 | 0.027121606 |
| ENSG00000160785 | SLC25A44 | 1.043235881 | 0.031687192 |
| ENSG00000077150 | NFKB2    | 1.043267959 | 0.018202093 |
| ENSG00000110711 | AIP      | 1.043277286 | 0.029662836 |
| ENSG00000068654 | POLR1A   | 1.043278292 | 0.001279735 |
| ENSG00000189306 | RRP7A    | 1.043319425 | 0.041320097 |
| ENSG00000198301 | SDAD1    | 1.043337175 | 0.02327037  |
| ENSG00000101276 | SLC52A3  | 1.043357119 | 0.010388446 |
| ENSG00000188647 | PTAR1    | 1.04336836  | 0.044901052 |
| ENSG00000204310 | AGPAT1   | 1.043371207 | 0.016551767 |
| ENSG00000089063 | TMEM230  | 1.043429237 | 0.012792258 |
| ENSG00000173726 | TOMM20   | 1.043460242 | 0.000250973 |
| ENSG00000186564 | FOXD2    | 1.043465601 | 0.029529831 |
| ENSG00000028310 | BRD9     | 1.043473519 | 0.008460785 |
| ENSG00000169756 | LIMS1    | 1.04347526  | 0.002763    |

|                 |           |             |             |
|-----------------|-----------|-------------|-------------|
| ENSG00000176853 | FAM91A1   | 1.043493836 | 0.007081359 |
| ENSG00000204086 | RPA4      | 1.043522285 | 0.047842274 |
| ENSG00000079134 | THOC1     | 1.04353731  | 0.01710972  |
| ENSG00000117614 | SYF2      | 1.04353807  | 0.000185147 |
| ENSG00000205858 | LRRC72    | 1.04354094  | 0.036654663 |
| ENSG00000117620 | SLC35A3   | 1.043548191 | 0.021400571 |
| ENSG00000089154 | GCN1L1    | 1.043664938 | 0.024160063 |
| ENSG00000131386 | GALNT15   | 1.043679611 | 0.013927519 |
| ENSG00000073803 | MAP3K13   | 1.043717107 | 0.000654892 |
| ENSG00000120318 | ARAP3     | 1.043731193 | 0.033758845 |
| ENSG00000158050 | DUSP2     | 1.043751047 | 0.040542829 |
| ENSG00000148219 | ASTN2     | 1.04377344  | 0.008395288 |
| ENSG00000159915 | ZNF233    | 1.043859201 | 0.006755479 |
| ENSG00000108559 | NUP88     | 1.043885829 | 0.004556861 |
| ENSG00000198369 | SPRED2    | 1.043899054 | 4.10E-05    |
| ENSG00000109917 | ZNF259    | 1.043901754 | 0.025447533 |
| ENSG00000091262 | ABCC6     | 1.043932696 | 0.021249355 |
| ENSG00000172260 | NEGR1     | 1.043957122 | 0.017415328 |
| ENSG00000110514 | MADD      | 1.043960489 | 0.005850811 |
| ENSG00000256073 | C21orf119 | 1.043967462 | 0.010684905 |
| ENSG00000065457 | ADAT1     | 1.043985237 | 0.040483477 |
| ENSG00000104884 | ERCC2     | 1.044002127 | 0.000411616 |
| ENSG00000144567 | FAM134A   | 1.044008212 | 0.000143191 |
| ENSG00000143543 | JTB       | 1.044016398 | 0.003694475 |
| ENSG00000065882 | TBC1D1    | 1.044045719 | 0.015388321 |
| ENSG00000166226 | CCT2      | 1.044048372 | 0.017503007 |
| ENSG00000197785 | ATAD3A    | 1.044091535 | 0.003839876 |
| ENSG00000123999 | INHA      | 1.044100479 | 0.021132038 |
| ENSG00000173230 | GOLGB1    | 1.044106596 | 1.84E-05    |
| ENSG00000172336 | POP7      | 1.044124244 | 0.04241496  |
| ENSG00000085224 | ATRX      | 1.044132939 | 0.00416244  |
| ENSG00000188747 | NOXA1     | 1.044164649 | 0.019301219 |
| ENSG00000145384 | FABP2     | 1.0441738   | 0.037468366 |
| ENSG00000115944 | COX7A2L   | 1.04418775  | 0.016878297 |
| ENSG00000198783 | ZNF830    | 1.044189383 | 0.016663839 |
| ENSG00000071889 | FAM3A     | 1.04427844  | 0.020390524 |
| ENSG00000165355 | FBXO33    | 1.044344216 | 0.042971547 |
| ENSG00000172725 | CORO1B    | 1.044348465 | 0.031903168 |
| ENSG00000232112 | TMA7      | 1.044353073 | 8.54E-07    |
| ENSG00000110237 | ARHGEF17  | 1.044359105 | 0.006411396 |
| ENSG00000150403 | TMCO3     | 1.044382271 | 0.021025638 |
| ENSG00000198131 | ZNF544    | 1.04440807  | 0.022612032 |
| ENSG00000142751 | GPN2      | 1.044435295 | 0.013055173 |
| ENSG00000169087 | HSPBAP1   | 1.044466501 | 0.043749359 |
| ENSG00000164941 | INTS8     | 1.044467263 | 0.009653279 |
| ENSG00000174231 | PRPF8     | 1.044478218 | 0.016434164 |
| ENSG00000181192 | DHTKD1    | 1.044486459 | 0.00538881  |

|                 |          |             |             |
|-----------------|----------|-------------|-------------|
| ENSG00000010030 | ETV7     | 1.044501703 | 0.038401347 |
| ENSG00000085998 | POMGNT1  | 1.044509162 | 0.047706033 |
| ENSG00000118363 | SPCS2    | 1.04452219  | 0.0130406   |
| ENSG00000183615 | FAM167B  | 1.044534741 | 0.010522666 |
| ENSG00000054967 | RELT     | 1.044543314 | 0.036540004 |
| ENSG00000126653 | NSRP1    | 1.044565643 | 0.00332281  |
| ENSG00000152404 | CWF19L2  | 1.044590925 | 0.007721965 |
| ENSG00000123570 | RAB9B    | 1.044631014 | 0.016958953 |
| ENSG00000182934 | SRPR     | 1.044636431 | 0.002329776 |
| ENSG00000171853 | TRAPPC12 | 1.044669574 | 0.012044438 |
| ENSG00000109536 | FRG1     | 1.044678357 | 0.00678573  |
| ENSG00000197181 | PIWIL2   | 1.044698822 | 0.032756865 |
| ENSG00000163399 | ATP1A1   | 1.044708733 | 0.049585843 |
| ENSG00000189180 | ZNF33A   | 1.044712616 | 0.036179242 |
| ENSG00000175854 | SWI5     | 1.044713166 | 0.016420241 |
| ENSG00000146399 | TAAR1    | 1.044721913 | 0.047120673 |
| ENSG00000167118 | URM1     | 1.044724748 | 0.000561612 |
| ENSG00000143379 | SETDB1   | 1.044730384 | 0.000190452 |
| ENSG00000183255 | PTTG1IP  | 1.044752616 | 0.000719616 |
| ENSG00000196453 | ZNF777   | 1.04478841  | 4.32E-06    |
| ENSG00000187017 | ESPN     | 1.044799577 | 0.012010529 |
| ENSG00000166263 | STXBP4   | 1.04480451  | 1.12E-05    |
| ENSG00000187742 | SECISBP2 | 1.044815259 | 0.038559118 |
| ENSG00000108021 | FAM208B  | 1.04483218  | 0.000422521 |
| ENSG00000164736 | SOX17    | 1.044835763 | 0.008186259 |
| ENSG00000167775 | CD320    | 1.044856981 | 0.0484737   |
| ENSG00000242950 | ERVW-1   | 1.044882516 | 0.001444372 |
| ENSG00000143545 | RAB13    | 1.044900014 | 0.006161381 |
| ENSG00000148331 | ASB6     | 1.044900291 | 0.001163425 |
| ENSG00000203485 | INF2     | 1.044937405 | 0.000109436 |
| ENSG00000142694 | EVA1B    | 1.044947683 | 0.003054396 |
| ENSG00000123810 | B9D2     | 1.044969551 | 0.001524884 |
| ENSG00000123685 | BATF3    | 1.044990464 | 0.0051889   |
| ENSG00000163132 | MSX1     | 1.045018905 | 0.025380285 |
| ENSG00000134668 | SPOCD1   | 1.045020046 | 0.0077608   |
| ENSG00000171759 | PAH      | 1.045023155 | 0.006188473 |
| ENSG00000119777 | TMEM214  | 1.045060635 | 0.0123916   |
| ENSG00000142178 | SIK1     | 1.045100625 | 0.011352379 |
| ENSG00000101557 | USP14    | 1.04516299  | 0.004983613 |
| ENSG00000144713 | RPL32    | 1.045175295 | 4.97E-05    |
| ENSG00000205339 | IPO7     | 1.045193565 | 0.019210388 |
| ENSG00000115604 | IL18R1   | 1.045195702 | 0.031720366 |
| ENSG00000116754 | SRSF11   | 1.04524402  | 0.008940508 |
| ENSG00000093217 | XYLB     | 1.045284819 | 0.002876602 |
| ENSG00000103249 | CLCN7    | 1.045302469 | 0.025599725 |
| ENSG00000167674 | HDGFRP2  | 1.04536622  | 4.99E-05    |
| ENSG00000145555 | MYO10    | 1.045371219 | 0.032952412 |

|                 |          |             |             |
|-----------------|----------|-------------|-------------|
| ENSG00000163584 | RPL22L1  | 1.045372581 | 0.046185276 |
| ENSG00000163050 | ADCK3    | 1.045432519 | 8.57E-06    |
| ENSG00000171858 | RPS21    | 1.045445863 | 0.005468815 |
| ENSG00000139343 | SNRPF    | 1.045492451 | 0.004105941 |
| ENSG00000138792 | ENPEP    | 1.045603886 | 0.004024522 |
| ENSG00000188243 | COMMD6   | 1.045613745 | 0.006828658 |
| ENSG00000169504 | CLIC4    | 1.0456203   | 0.021413584 |
| ENSG00000088205 | DDX18    | 1.045623096 | 0.001089438 |
| ENSG00000144028 | SNRNP200 | 1.045631619 | 0.018917576 |
| ENSG00000152795 | HNRNPDL  | 1.045641167 | 0.003171583 |
| ENSG00000183542 | KLRC4    | 1.045647449 | 0.017082229 |
| ENSG00000196504 | PRPF40A  | 1.045658561 | 0.000148555 |
| ENSG00000174111 | SOCS7    | 1.04566669  | 0.024548839 |
| ENSG00000170759 | KIF5B    | 1.045679714 | 3.76E-05    |
| ENSG00000164136 | IL15     | 1.045740101 | 0.01523524  |
| ENSG00000140905 | GCSH     | 1.045746001 | 0.043133906 |
| ENSG00000167487 | KLHL26   | 1.045757532 | 0.018214185 |
| ENSG00000108587 | GOSR1    | 1.045812429 | 0.024116979 |
| ENSG00000113621 | TXNDC15  | 1.045848981 | 0.006618876 |
| ENSG00000121964 | GTDC1    | 1.045853053 | 8.37E-05    |
| ENSG00000002549 | LAP3     | 1.045856015 | 0.037297166 |
| ENSG00000117411 | B4GALT2  | 1.045862823 | 0.009875707 |
| ENSG00000092969 | TGFB2    | 1.045874087 | 0.013233195 |
| ENSG00000159110 | IFNAR2   | 1.045878353 | 0.019308558 |
| ENSG00000178971 | CTC1     | 1.045905637 | 0.00995942  |
| ENSG00000153253 | SCN3A    | 1.045908161 | 0.000305458 |
| ENSG00000065600 | TMEM206  | 1.045937464 | 0.030257885 |
| ENSG00000102595 | UGGT2    | 1.045939798 | 0.011503693 |
| ENSG00000112514 | CUTA     | 1.045979915 | 0.010020134 |
| ENSG00000197054 | ZNF763   | 1.045982092 | 0.030671272 |
| ENSG00000177764 | ZCCHC3   | 1.046122799 | 0.000355028 |
| ENSG00000165775 | FUNDC2   | 1.046130567 | 0.000526476 |
| ENSG00000104320 | NBN      | 1.046152446 | 0.02139775  |
| ENSG00000144228 | SPOPL    | 1.046175399 | 0.022243245 |
| ENSG00000198836 | OPA1     | 1.046183485 | 0.005268542 |
| ENSG00000124529 | HIST1H4B | 1.046187122 | 0.008398714 |
| ENSG00000117298 | ECE1     | 1.046243943 | 0.002548999 |
| ENSG00000188580 | NKAIN2   | 1.04624691  | 0.045012391 |
| ENSG00000123427 | METTL21B | 1.046257292 | 0.033723572 |
| ENSG00000067066 | SP100    | 1.046257407 | 0.048086472 |
| ENSG00000106771 | TMEM245  | 1.046266104 | 0.003181668 |
| ENSG00000101439 | CST3     | 1.046277815 | 0.045027628 |
| ENSG00000157350 | ST3GAL2  | 1.046278919 | 7.56E-05    |
| ENSG00000058600 | POLR3E   | 1.046288709 | 0.001259874 |
| ENSG00000163576 | EFHB     | 1.046294827 | 0.006482033 |
| ENSG00000143179 | UCK2     | 1.046312016 | 0.043608025 |
| ENSG00000175216 | CKAP5    | 1.046326913 | 0.006193407 |

|                 |           |             |             |
|-----------------|-----------|-------------|-------------|
| ENSG00000137312 | FLOT1     | 1.046343565 | 0.005372646 |
| ENSG00000155097 | ATP6V1C1  | 1.046350451 | 0.011145523 |
| ENSG00000119508 | NR4A3     | 1.046369044 | 0.004271154 |
| ENSG00000134905 | CARS2     | 1.046402882 | 0.018462213 |
| ENSG00000166682 | TMPRSS5   | 1.046413781 | 0.011513555 |
| ENSG00000185825 | BCAP31    | 1.04641817  | 0.006294813 |
| ENSG00000172828 | CES3      | 1.046483916 | 0.031420216 |
| ENSG00000133687 | TMTC1     | 1.046491288 | 0.033119961 |
| ENSG00000117360 | PRPF3     | 1.046514866 | 0.014596642 |
| ENSG00000110435 | PDHX      | 1.04651837  | 0.010032876 |
| ENSG00000029639 | TFB1M     | 1.04652435  | 0.002227641 |
| ENSG00000108797 | CNTNAP1   | 1.046533457 | 0.018339845 |
| ENSG00000176371 | ZSCAN2    | 1.046562472 | 6.09E-05    |
| ENSG00000126067 | PSMB2     | 1.046600421 | 0.014323678 |
| ENSG00000172071 | EIF2AK3   | 1.04669779  | 0.003401226 |
| ENSG00000182004 | SNRPE     | 1.046701854 | 0.021153337 |
| ENSG00000175467 | SART1     | 1.046709663 | 0.0055644   |
| ENSG00000142687 | KIAA0319L | 1.046721509 | 0.001301285 |
| ENSG00000164978 | NUDT2     | 1.046744549 | 0.032651175 |
| ENSG00000196358 | NTNG2     | 1.046752426 | 0.009558611 |
| ENSG00000008324 | SS18L2    | 1.046777456 | 4.91E-05    |
| ENSG00000175354 | PTPN2     | 1.04682529  | 0.042867516 |
| ENSG00000163002 | NUP35     | 1.046836617 | 0.016447537 |
| ENSG00000106003 | LFNG      | 1.046850882 | 0.007945103 |
| ENSG00000154429 | CCSAP     | 1.046851203 | 0.003797034 |
| ENSG00000149633 | KIAA1755  | 1.046853159 | 0.007113238 |
| ENSG00000140688 | C16orf58  | 1.046927445 | 0.003231028 |
| ENSG00000163479 | SSR2      | 1.04693082  | 0.007567889 |
| ENSG00000166391 | MOGAT2    | 1.046980612 | 0.045710278 |
| ENSG00000221821 | C6orf226  | 1.046981728 | 0.007998796 |
| ENSG00000081019 | RSBN1     | 1.047018896 | 0.002803411 |
| ENSG00000141002 | TCF25     | 1.047022644 | 0.014576419 |
| ENSG00000107371 | EXOSC3    | 1.047068348 | 0.0057946   |
| ENSG00000177602 | GSG2      | 1.047113746 | 0.035098179 |
| ENSG00000085978 | ATG16L1   | 1.047120285 | 0.005061989 |
| ENSG00000213588 | ZBTB9     | 1.047138719 | 0.009548624 |
| ENSG00000182173 | TSEN54    | 1.047140177 | 0.0001979   |
| ENSG00000165118 | C9orf64   | 1.04714887  | 0.005367316 |
| ENSG00000147889 | CDKN2A    | 1.047176238 | 0.012705525 |
| ENSG00000253719 | ATXN7L3B  | 1.047194136 | 0.021446371 |
| ENSG00000118369 | USP35     | 1.047203997 | 0.014421892 |
| ENSG00000116128 | BCL9      | 1.047211325 | 0.000143595 |
| ENSG00000136877 | FPGS      | 1.047224458 | 0.00094544  |
| ENSG00000174099 | MSRB3     | 1.047300271 | 0.021770313 |
| ENSG00000041880 | PARP3     | 1.04730235  | 0.037222733 |
| ENSG00000151778 | SERP2     | 1.047305567 | 0.003571211 |
| ENSG00000115109 | EPB41L5   | 1.047334285 | 0.004479112 |

|                 |           |             |             |
|-----------------|-----------|-------------|-------------|
| ENSG00000132600 | PRMT7     | 1.047354879 | 0.004512587 |
| ENSG00000136819 | C9orf78   | 1.047358238 | 0.037659407 |
| ENSG00000105063 | PPP6R1    | 1.047370172 | 0.000533588 |
| ENSG00000130511 | SSBP4     | 1.047373545 | 0.001968396 |
| ENSG00000125877 | ITPA      | 1.047402328 | 0.006114606 |
| ENSG00000082516 | GEMIN5    | 1.047431622 | 0.046603838 |
| ENSG00000151348 | EXT2      | 1.047438943 | 0.024477354 |
| ENSG00000204611 | ZNF616    | 1.047471153 | 0.009256641 |
| ENSG00000197217 | ENTPD4    | 1.047474356 | 0.02061183  |
| ENSG00000137672 | TRPC6     | 1.047488174 | 0.001470497 |
| ENSG00000137731 | FXD2      | 1.047494412 | 0.023676116 |
| ENSG00000183597 | TANGO2    | 1.0475019   | 0.001906374 |
| ENSG00000082641 | NFE2L1    | 1.047503957 | 0.001041654 |
| ENSG00000033867 | SLC4A7    | 1.047508092 | 0.005594062 |
| ENSG00000218739 | CEBPZ-AS1 | 1.047511996 | 0.011104922 |
| ENSG00000122515 | ZMIZ2     | 1.047514725 | 0.014305845 |
| ENSG00000126254 | RBM42     | 1.047527517 | 0.02013967  |
| ENSG00000197860 | SGTB      | 1.047547359 | 8.46E-05    |
| ENSG00000205336 | GPR56     | 1.047588527 | 0.001749664 |
| ENSG00000130702 | LAMA5     | 1.047603473 | 0.030830673 |
| ENSG00000112081 | SRSF3     | 1.047608307 | 0.045670647 |
| ENSG00000121068 | TBX2      | 1.047612371 | 0.001084212 |
| ENSG00000103174 | NAGPA     | 1.047670932 | 0.035390693 |
| ENSG00000177954 | RPS27     | 1.047674053 | 0.000214386 |
| ENSG00000056661 | PCGF2     | 1.047687752 | 0.006975066 |
| ENSG00000128829 | EIF2AK4   | 1.047687771 | 0.047433909 |
| ENSG00000131778 | CHD1L     | 1.047696904 | 0.020532635 |
| ENSG00000166073 | GPR176    | 1.047708092 | 0.001425839 |
| ENSG00000010165 | METTL13   | 1.047762142 | 0.013071665 |
| ENSG00000168701 | TMEM208   | 1.047763249 | 0.033934288 |
| ENSG00000134864 | GGACT     | 1.04776725  | 0.000407614 |
| ENSG00000198331 | HYLS1     | 1.047771462 | 0.023510096 |
| ENSG00000172732 | MUS81     | 1.047775308 | 0.015144314 |
| ENSG00000105618 | PRPF31    | 1.047781886 | 0.026901478 |
| ENSG00000184216 | IRAK1     | 1.047790137 | 0.043210232 |
| ENSG00000127191 | TRAF2     | 1.047804498 | 0.005971645 |
| ENSG00000125967 | NECAB3    | 1.047818443 | 0.000297779 |
| ENSG00000172171 | TEFM      | 1.047825077 | 0.013491854 |
| ENSG00000174292 | TNK1      | 1.047908245 | 0.000158142 |
| ENSG00000007080 | CCDC124   | 1.047911055 | 0.005175766 |
| ENSG00000095794 | CREM      | 1.047932309 | 0.001318019 |
| ENSG00000117410 | ATP6V0B   | 1.04799231  | 0.029548215 |
| ENSG00000067113 | PPAP2A    | 1.04801792  | 0.038382731 |
| ENSG00000099282 | TSPAN15   | 1.048045124 | 0.027880847 |
| ENSG00000100505 | TRIM9     | 1.04805689  | 0.039613165 |
| ENSG00000086015 | MAST2     | 1.048076281 | 0.039718056 |
| ENSG0000008018  | PSMB1     | 1.048077684 | 6.28E-05    |

|                 |          |             |             |
|-----------------|----------|-------------|-------------|
| ENSG00000183773 | AIFM3    | 1.04811647  | 0.008905817 |
| ENSG00000170442 | KRT86    | 1.048122561 | 0.013453699 |
| ENSG00000147684 | NDUFB9   | 1.048222413 | 0.002110067 |
| ENSG00000198612 | COPS8    | 1.048227505 | 0.000364794 |
| ENSG00000064012 | CASP8    | 1.048236638 | 0.001004735 |
| ENSG00000156531 | PHF6     | 1.048246375 | 8.77E-05    |
| ENSG00000163933 | RFT1     | 1.048260134 | 0.027820137 |
| ENSG00000154783 | FGD5     | 1.048272714 | 0.001606393 |
| ENSG00000090581 | GNPTG    | 1.048273801 | 0.001478113 |
| ENSG00000119640 | ACYP1    | 1.048274224 | 0.037030163 |
| ENSG00000117143 | UAP1     | 1.048330536 | 0.004746812 |
| ENSG00000172057 | ORMDL3   | 1.048334772 | 0.001668529 |
| ENSG00000105519 | CAPS     | 1.048350141 | 0.049165175 |
| ENSG00000184886 | PIGW     | 1.048376035 | 0.037082011 |
| ENSG00000175213 | ZNF408   | 1.048395334 | 0.000697037 |
| ENSG00000065361 | ERBB3    | 1.048398596 | 0.001962788 |
| ENSG00000141293 | SKAP1    | 1.048443296 | 0.018028076 |
| ENSG00000161996 | WDR90    | 1.0484764   | 0.005844145 |
| ENSG00000150337 | FCGR1A   | 1.048478996 | 0.002774999 |
| ENSG00000173638 | SLC19A1  | 1.048481315 | 0.000190342 |
| ENSG00000164011 | ZNF691   | 1.048496844 | 0.007959039 |
| ENSG00000125449 | ARMC7    | 1.048498089 | 0.000140038 |
| ENSG00000083097 | DOPEY1   | 1.048539835 | 0.007666092 |
| ENSG00000158402 | CDC25C   | 1.048557395 | 0.001644177 |
| ENSG00000112511 | PHF1     | 1.048558864 | 0.000208693 |
| ENSG00000025156 | HSF2     | 1.048561675 | 0.024863455 |
| ENSG00000197694 | SPTAN1   | 1.048570704 | 0.027491365 |
| ENSG00000039650 | PNKP     | 1.048586936 | 0.042459117 |
| ENSG00000115652 | UXS1     | 1.04859036  | 0.012863758 |
| ENSG00000156471 | PTDSS1   | 1.048634935 | 0.019996789 |
| ENSG00000171634 | BPTF     | 1.048643398 | 0.017903006 |
| ENSG0000013523  | ANGEL1   | 1.048703669 | 0.000449634 |
| ENSG00000197362 | ZNF786   | 1.048742718 | 0.006850497 |
| ENSG00000164961 | KIAA0196 | 1.04876114  | 0.032331982 |
| ENSG00000105738 | SIPA1L3  | 1.048766817 | 0.004252192 |
| ENSG00000138613 | APH1B    | 1.048860138 | 0.025253114 |
| ENSG00000180071 | ANKRD18A | 1.048863103 | 0.012303745 |
| ENSG00000067141 | NEO1     | 1.048874027 | 0.014403133 |
| ENSG00000099385 | BCL7C    | 1.048874795 | 0.012242674 |
| ENSG00000107186 | MPDZ     | 1.048894112 | 0.014025714 |
| ENSG00000198055 | GRK6     | 1.048902619 | 0.001020129 |
| ENSG00000165732 | DDX21    | 1.049021671 | 0.002187819 |
| ENSG00000196584 | XRCC2    | 1.049068096 | 0.034741229 |
| ENSG00000127554 | GFER     | 1.049075489 | 0.000301283 |
| ENSG00000164111 | ANXA5    | 1.049084327 | 0.004301209 |
| ENSG00000088812 | ATRN     | 1.049089614 | 0.043814578 |
| ENSG00000185634 | SHC4     | 1.049095353 | 6.86E-05    |

|                 |            |             |             |
|-----------------|------------|-------------|-------------|
| ENSG00000174780 | SRP72      | 1.049108154 | 0.0052294   |
| ENSG00000100731 | PCNX       | 1.049108254 | 6.46E-05    |
| ENSG00000110987 | BCL7A      | 1.049112556 | 0.001292788 |
| ENSG00000135775 | COG2       | 1.049124824 | 0.005666503 |
| ENSG00000162385 | MAGOH      | 1.0491397   | 0.041330698 |
| ENSG00000091879 | ANGPT2     | 1.049160414 | 0.007799183 |
| ENSG00000108106 | UBE2S      | 1.049225511 | 0.006154005 |
| ENSG00000110074 | FOXRED1    | 1.049259235 | 0.006734846 |
| ENSG00000204514 | ZNF814     | 1.049276029 | 0.008294881 |
| ENSG00000177732 | SOX12      | 1.049279216 | 0.003567441 |
| ENSG00000132382 | MYBBP1A    | 1.049283459 | 5.14E-05    |
| ENSG00000178028 | DMAP1      | 1.049286978 | 0.007212362 |
| ENSG00000103510 | KAT8       | 1.049295974 | 0.000553876 |
| ENSG00000130332 | LSM7       | 1.04930142  | 0.048188667 |
| ENSG00000185347 | C14orf80   | 1.049369192 | 0.001475986 |
| ENSG00000047932 | GOPC       | 1.04937019  | 0.003756197 |
| ENSG00000111481 | COPZ1      | 1.049383394 | 0.013561219 |
| ENSG00000117791 | 2-Mar      | 1.049406177 | 0.047999402 |
| ENSG00000170903 | MSANTD4    | 1.049409892 | 0.018055747 |
| ENSG00000171914 | TLN2       | 1.049439322 | 0.038416295 |
| ENSG00000179262 | RAD23A     | 1.049446422 | 0.021415205 |
| ENSG00000198924 | DCLRE1A    | 1.049463599 | 0.031799216 |
| ENSG00000106976 | DNM1       | 1.04947645  | 0.02341303  |
| ENSG00000117597 | DIEXF      | 1.049496276 | 0.003127924 |
| ENSG00000173875 | ZNF791     | 1.049568345 | 0.035059201 |
| ENSG00000256223 | ZNF10      | 1.049572012 | 0.034557518 |
| ENSG00000168884 | TNIP2      | 1.049577406 | 0.001776217 |
| ENSG00000267976 | AP000695.1 | 1.049587797 | 0.001508828 |
| ENSG00000106460 | TMEM106B   | 1.049593361 | 0.024536695 |
| ENSG00000165480 | SKA3       | 1.049628035 | 0.027679031 |
| ENSG00000128536 | CDHR3      | 1.049640779 | 0.000493314 |
| ENSG00000188486 | H2AFX      | 1.049721305 | 0.001408267 |
| ENSG00000105229 | PIAS4      | 1.04972891  | 0.002677886 |
| ENSG00000086232 | EIF2AK1    | 1.049732903 | 0.016198568 |
| ENSG00000119705 | SLIRP      | 1.049736232 | 0.009774915 |
| ENSG00000150938 | CRIM1      | 1.049750503 | 0.011201719 |
| ENSG00000170632 | ARMC10     | 1.049766013 | 0.004925908 |
| ENSG00000144021 | CIAO1      | 1.049797796 | 0.000907176 |
| ENSG00000145014 | TMEM44     | 1.049805588 | 0.017221618 |
| ENSG00000160883 | HK3        | 1.049816323 | 0.007081319 |
| ENSG00000167291 | TBC1D16    | 1.049819357 | 1.97E-05    |
| ENSG00000157833 | GAREML     | 1.049823537 | 0.006734995 |
| ENSG00000140564 | FURIN      | 1.049828404 | 4.75E-05    |
| ENSG00000113361 | CDH6       | 1.049848368 | 0.000997493 |
| ENSG00000174021 | GNG5       | 1.049849986 | 0.000248568 |
| ENSG00000142273 | CBLC       | 1.049865541 | 0.000888017 |
| ENSG00000144214 | LYG1       | 1.049881159 | 0.00872949  |

|                 |               |             |             |
|-----------------|---------------|-------------|-------------|
| ENSG00000141141 | DDX52         | 1.049896612 | 0.033304712 |
| ENSG00000184205 | TSPYL2        | 1.049903557 | 0.001481642 |
| ENSG00000135622 | SEMA4F        | 1.049908319 | 0.000159017 |
| ENSG00000120742 | SERP1         | 1.049919609 | 0.015669594 |
| ENSG00000101901 | ALG13         | 1.04993383  | 0.000929752 |
| ENSG00000137168 | PPIL1         | 1.049966701 | 0.049334925 |
| ENSG00000198879 | SFMBT2        | 1.049982529 | 0.028550911 |
| ENSG0000006025  | OSBPL7        | 1.049991092 | 0.007014813 |
| ENSG00000085840 | ORC1          | 1.049991237 | 0.049378269 |
| ENSG00000171307 | ZDHHC16       | 1.050020588 | 0.001257091 |
| ENSG00000184508 | HDCC3         | 1.050047021 | 0.002687663 |
| ENSG00000164898 | C7orf55       | 1.050104281 | 0.01008536  |
| ENSG00000128335 | APOL2         | 1.050104323 | 0.011452395 |
| ENSG00000110651 | CD81          | 1.050113657 | 0.022667794 |
| ENSG00000181704 | YIPF6         | 1.050128923 | 0.000492062 |
| ENSG00000113273 | ARSB          | 1.050169945 | 0.000635892 |
| ENSG00000106034 | CPED1         | 1.050178198 | 0.009842916 |
| ENSG00000112319 | EYA4          | 1.050187372 | 0.029638984 |
| ENSG00000156127 | BATF          | 1.050199516 | 0.023045232 |
| ENSG00000184408 | KCND2         | 1.050209946 | 0.003617563 |
| ENSG00000198363 | ASPH          | 1.050304477 | 0.017301179 |
| ENSG00000164690 | SHH           | 1.050323032 | 0.005766943 |
| ENSG00000196372 | ASB13         | 1.05032397  | 0.016949761 |
| ENSG00000062524 | LTK           | 1.050351774 | 0.009958162 |
| ENSG00000169251 | NMD3          | 1.050418377 | 0.005382398 |
| ENSG00000224877 | C17orf89      | 1.050434493 | 4.62E-05    |
| ENSG00000163257 | DCAF16        | 1.05043462  | 0.04759025  |
| ENSG00000131697 | NPHP4         | 1.050435916 | 0.000309024 |
| ENSG00000128268 | MGAT3         | 1.050452405 | 0.000371901 |
| ENSG00000137221 | TJAP1         | 1.050458053 | 0.000647305 |
| ENSG00000157823 | AP3S2         | 1.050509831 | 0.002144535 |
| ENSG00000115350 | POLE4         | 1.050511885 | 0.008409151 |
| ENSG00000156858 | PRR14         | 1.050525268 | 0.00161473  |
| ENSG00000072274 | TFRC          | 1.050527734 | 0.000617618 |
| ENSG00000142025 | DMRTC2        | 1.050576825 | 0.002119625 |
| ENSG00000158158 | CNNM4         | 1.050608286 | 0.037125396 |
| ENSG00000058262 | SEC61A1       | 1.050619174 | 0.002662331 |
| ENSG00000128563 | PRKRIP1       | 1.050682799 | 0.000706183 |
| ENSG00000162241 | SLC25A45      | 1.050694359 | 0.031772465 |
| ENSG00000137494 | ANKRD42       | 1.050694433 | 0.011942234 |
| ENSG00000072110 | ACTN1         | 1.050730742 | 0.009786344 |
| ENSG00000164953 | TMEM67        | 1.050775903 | 0.000347289 |
| ENSG00000107798 | LIPA          | 1.050776326 | 0.003298454 |
| ENSG00000124795 | DEK           | 1.050796982 | 0.00328462  |
| ENSG00000248713 | RP11-766F14.2 | 1.050820193 | 0.011252853 |
| ENSG00000198917 | C9orf114      | 1.050821015 | 0.001042602 |
| ENSG00000162576 | MXRA8         | 1.05083857  | 0.002938547 |

|                 |          |             |             |
|-----------------|----------|-------------|-------------|
| ENSG00000068878 | PSME4    | 1.050850297 | 0.022151852 |
| ENSG00000135372 | NAT10    | 1.050857848 | 0.01727139  |
| ENSG00000203667 | COX20    | 1.050896258 | 0.042695963 |
| ENSG00000154945 | ANKRD40  | 1.050929199 | 0.000464112 |
| ENSG00000161671 | EMC10    | 1.050935445 | 0.001399039 |
| ENSG00000170961 | HAS2     | 1.050945658 | 0.019480205 |
| ENSG00000170619 | COMMD5   | 1.050978739 | 0.001839732 |
| ENSG00000170044 | ZPLD1    | 1.050992086 | 0.001781325 |
| ENSG00000196597 | ZNF782   | 1.050998582 | 0.024152035 |
| ENSG00000125352 | RNF113A  | 1.050998953 | 0.002897513 |
| ENSG00000164946 | FREM1    | 1.051019773 | 0.04719375  |
| ENSG00000169914 | OTUD3    | 1.051050884 | 0.038081587 |
| ENSG00000100532 | CGRRF1   | 1.051066726 | 0.007255868 |
| ENSG00000121940 | CLCC1    | 1.051078675 | 0.008172244 |
| ENSG00000075151 | EIF4G3   | 1.051114215 | 0.000589083 |
| ENSG00000152219 | ARL14EP  | 1.051137251 | 0.013929041 |
| ENSG00000115325 | DOK1     | 1.051157944 | 1.97E-05    |
| ENSG00000135537 | LACE1    | 1.051160313 | 0.006372297 |
| ENSG00000184634 | MED12    | 1.051167461 | 0.004994672 |
| ENSG00000171700 | RGS19    | 1.05124057  | 0.038673266 |
| ENSG00000137288 | UQCC2    | 1.051274352 | 0.019843821 |
| ENSG00000211460 | TSN      | 1.051332488 | 0.001230131 |
| ENSG00000168434 | COG7     | 1.051339644 | 0.046156109 |
| ENSG00000106692 | FKTN     | 1.05141301  | 0.031544242 |
| ENSG00000119509 | INVS     | 1.0514261   | 5.78E-05    |
| ENSG00000127922 | SHFM1    | 1.0514942   | 0.000958796 |
| ENSG00000069424 | KCNAB2   | 1.051514498 | 0.000113833 |
| ENSG00000178719 | GRINA    | 1.05153296  | 0.026512236 |
| ENSG00000146966 | DENND2A  | 1.051552067 | 0.007649098 |
| ENSG00000196684 | HSH2D    | 1.051574649 | 0.004241865 |
| ENSG00000101052 | IFT52    | 1.051581167 | 0.001292533 |
| ENSG00000154822 | PLCL2    | 1.051582041 | 0.022263729 |
| ENSG00000116497 | S100PBP  | 1.051611848 | 0.006014183 |
| ENSG00000109756 | RAPGEF2  | 1.051644081 | 0.004595162 |
| ENSG00000163389 | POGLUT1  | 1.051651301 | 0.008070744 |
| ENSG00000116898 | MRPS15   | 1.051664317 | 0.001692704 |
| ENSG00000146858 | ZC3HAV1L | 1.051685773 | 0.003342237 |
| ENSG00000118508 | RAB32    | 1.051691986 | 0.047149762 |
| ENSG00000214706 | IFRD2    | 1.051705028 | 0.008128311 |
| ENSG00000143479 | DYRK3    | 1.051717361 | 0.00729213  |
| ENSG00000116679 | IVNS1ABP | 1.051763285 | 0.013916165 |
| ENSG00000204356 | NELFE    | 1.051788329 | 0.000191085 |
| ENSG00000134318 | ROCK2    | 1.05179749  | 0.006172177 |
| ENSG00000160058 | BSDC1    | 1.051806974 | 0.019381892 |
| ENSG00000040531 | CTNS     | 1.051824618 | 0.042394125 |
| ENSG00000197980 | LEKR1    | 1.051869437 | 0.033093131 |
| ENSG00000228696 | ARL17B   | 1.051941783 | 0.044872257 |

|                 |          |             |             |
|-----------------|----------|-------------|-------------|
| ENSG00000081721 | DUSP12   | 1.051979317 | 0.035891692 |
| ENSG00000181191 | PJA1     | 1.052018262 | 0.012945475 |
| ENSG00000154473 | BUB3     | 1.05201951  | 0.017431495 |
| ENSG00000075131 | TIPIN    | 1.052046216 | 0.029082842 |
| ENSG00000089820 | ARHGAP4  | 1.052049526 | 0.002468136 |
| ENSG00000168014 | C2CD3    | 1.052054086 | 0.006861783 |
| ENSG00000172269 | DPAGT1   | 1.052056363 | 0.006775367 |
| ENSG00000197859 | ADAMTSL2 | 1.052066417 | 0.031655556 |
| ENSG00000204613 | TRIM10   | 1.05207949  | 7.50E-05    |
| ENSG00000167978 | SRRM2    | 1.05208639  | 0.03056636  |
| ENSG00000151388 | ADAMTS12 | 1.052183178 | 0.004490254 |
| ENSG00000257923 | CUX1     | 1.052189627 | 0.007937001 |
| ENSG00000170448 | NFXL1    | 1.052191466 | 0.014312194 |
| ENSG00000116833 | NR5A2    | 1.052225683 | 0.008871342 |
| ENSG00000162341 | TPCN2    | 1.05225535  | 0.042909283 |
| ENSG00000138442 | WDR12    | 1.052290673 | 0.000496618 |
| ENSG00000166261 | ZNF202   | 1.052298295 | 0.0233222   |
| ENSG00000146386 | ABRACL   | 1.052351735 | 0.007549239 |
| ENSG00000139637 | C12orf10 | 1.0523623   | 0.006343603 |
| ENSG00000069275 | NUCKS1   | 1.052366672 | 3.08E-05    |
| ENSG00000169169 | CPT1C    | 1.052406818 | 0.041519757 |
| ENSG00000143344 | RGL1     | 1.052414974 | 0.002156262 |
| ENSG00000108883 | EFTUD2   | 1.052415381 | 0.00229563  |
| ENSG00000163848 | ZNF148   | 1.052434185 | 6.96E-05    |
| ENSG00000100219 | XBP1     | 1.052441632 | 0.011683257 |
| ENSG00000100253 | MIOX     | 1.052451433 | 0.04663584  |
| ENSG00000116604 | MEF2D    | 1.052453656 | 0.000464713 |
| ENSG00000177464 | GPR4     | 1.052487943 | 0.000775123 |
| ENSG00000051108 | HERPUD1  | 1.052493566 | 0.021619809 |
| ENSG00000105983 | LMBR1    | 1.052530556 | 0.017814782 |
| ENSG00000090372 | STRN4    | 1.052543166 | 0.025687446 |
| ENSG00000132109 | TRIM21   | 1.052545052 | 0.024131542 |
| ENSG00000204852 | TCTN1    | 1.052551971 | 0.001395031 |
| ENSG00000151500 | THYN1    | 1.052560043 | 0.007784592 |
| ENSG00000135100 | HNF1A    | 1.052564471 | 0.003418456 |
| ENSG00000136531 | SCN2A    | 1.052598542 | 0.037524677 |
| ENSG00000254986 | DPP3     | 1.052606938 | 1.70E-05    |
| ENSG00000132153 | DHX30    | 1.052662989 | 1.18E-05    |
| ENSG00000177096 | FAM109B  | 1.052668066 | 0.024818713 |
| ENSG00000129167 | TPH1     | 1.052692953 | 0.007988702 |
| ENSG00000125970 | RALY     | 1.052707065 | 0.026783012 |
| ENSG00000121578 | B4GALT4  | 1.052761451 | 0.014540978 |
| ENSG00000143702 | CEP170   | 1.052776959 | 0.039946847 |
| ENSG00000091732 | ZC3HC1   | 1.052795658 | 0.001367849 |
| ENSG00000143183 | TMCO1    | 1.052797935 | 3.14E-05    |
| ENSG00000160570 | DEDD2    | 1.052805309 | 0.003788635 |
| ENSG00000075142 | SRI      | 1.052812927 | 0.002649646 |

|                 |            |             |             |
|-----------------|------------|-------------|-------------|
| ENSG00000150093 | ITGB1      | 1.052832352 | 0.011316009 |
| ENSG00000109111 | SUPT6H     | 1.052851065 | 0.000105195 |
| ENSG00000166349 | RAG1       | 1.052869023 | 0.049143107 |
| ENSG00000134899 | ERCC5      | 1.052881831 | 0.009091367 |
| ENSG00000104299 | INTS9      | 1.052903515 | 0.037811669 |
| ENSG00000181577 | C6orf223   | 1.052921714 | 0.008601327 |
| ENSG00000203724 | C1orf53    | 1.052939155 | 0.02708571  |
| ENSG00000130119 | GNL3L      | 1.052940355 | 0.038737821 |
| ENSG00000125354 | 6-Sep      | 1.052948    | 0.045454483 |
| ENSG00000215067 | AC027763.2 | 1.05296933  | 0.00151271  |
| ENSG00000172123 | SLFN12     | 1.052979021 | 0.024101578 |
| ENSG00000115053 | NCL        | 1.052989319 | 0.002032519 |
| ENSG00000188986 | NELFB      | 1.052996195 | 0.005880907 |
| ENSG00000171824 | EXOSC10    | 1.053002931 | 0.00034626  |
| ENSG00000165675 | ENOX2      | 1.053004676 | 0.010663547 |
| ENSG00000198208 | RPS6KL1    | 1.053038904 | 0.031086951 |
| ENSG00000149582 | TMEM25     | 1.05306987  | 0.000597365 |
| ENSG00000163818 | LZTFL1     | 1.053070101 | 0.014162899 |
| ENSG00000185379 | RAD51D     | 1.053083756 | 0.011599533 |
| ENSG00000003509 | NDUFAF7    | 1.053108193 | 0.008595334 |
| ENSG00000196422 | PPP1R26    | 1.053152127 | 0.001629763 |
| ENSG00000162910 | MRPL55     | 1.053209202 | 1.87E-05    |
| ENSG00000120942 | UBIAD1     | 1.053224189 | 1.93E-05    |
| ENSG00000116903 | EXOC8      | 1.053226051 | 0.011943955 |
| ENSG00000070610 | GBA2       | 1.053305823 | 0.004953194 |
| ENSG00000004866 | ST7        | 1.053360278 | 0.00441412  |
| ENSG00000090273 | NUDC       | 1.053369119 | 0.025296322 |
| ENSG00000165416 | SUGT1      | 1.053388164 | 0.002385705 |
| ENSG00000149577 | SIDT2      | 1.053391257 | 0.030577145 |
| ENSG00000169604 | ANTXR1     | 1.053400504 | 0.001388812 |
| ENSG00000119041 | GTF3C3     | 1.053463837 | 1.09E-05    |
| ENSG00000099326 | MZF1       | 1.053517482 | 0.002050244 |
| ENSG00000151131 | C12orf45   | 1.053529644 | 0.001283997 |
| ENSG00000196739 | COL27A1    | 1.053565125 | 0.010172609 |
| ENSG00000196655 | TRAPPC4    | 1.053575711 | 0.000811184 |
| ENSG00000156873 | PHKG2      | 1.053643711 | 0.010271381 |
| ENSG00000122547 | EEPD1      | 1.053647196 | 0.000380846 |
| ENSG00000148335 | NTMT1      | 1.053650013 | 2.52E-05    |
| ENSG00000197956 | S100A6     | 1.053655476 | 0.000230566 |
| ENSG00000144579 | CTDSP1     | 1.053659267 | 0.000140238 |
| ENSG00000096384 | HSP90AB1   | 1.053685973 | 0.032072005 |
| ENSG00000150907 | FOXO1      | 1.053707557 | 0.010402701 |
| ENSG00000125744 | RTN2       | 1.053707855 | 0.045736603 |
| ENSG00000132432 | SEC61G     | 1.053708664 | 0.008193379 |
| ENSG00000187456 | RDM1       | 1.053756207 | 0.01411032  |
| ENSG00000144560 | VGLL4      | 1.053762484 | 0.00477464  |
| ENSG00000198752 | CDC42BPB   | 1.053800083 | 0.034461239 |

|                  |            |             |             |
|------------------|------------|-------------|-------------|
| ENSG00000180822  | PSMG4      | 1.053805942 | 0.002312395 |
| ENSG00000139266  | 9-Mar      | 1.053870643 | 0.00113456  |
| ENSG00000136444  | RSAD1      | 1.054011406 | 0.011632158 |
| ENSG00000122122  | SASH3      | 1.05401326  | 0.044387654 |
| ENSG00000141428  | C18orf21   | 1.054021334 | 0.047576922 |
| ENSG00000101868  | POLA1      | 1.054043446 | 0.032951423 |
| ENSG00000026751  | SLAMF7     | 1.054044193 | 0.042121804 |
| ENSG00000116704  | SLC35D1    | 1.054056573 | 0.038801811 |
| ENSG00000105655  | ISYNA1     | 1.05408055  | 0.007535748 |
| ENSG00000124920  | MYRF       | 1.054095918 | 0.000720823 |
| ENSG00000124743  | KLHL31     | 1.054106297 | 0.003579676 |
| ENSG00000167862  | ICT1       | 1.054119824 | 0.018704223 |
| ENSG00000116539  | ASH1L      | 1.054140199 | 4.06E-07    |
| ENSG00000185000  | DGAT1      | 1.054144904 | 0.044274375 |
| ENSG00000163159  | VPS72      | 1.054195904 | 0.007520974 |
| ENSG00000186409  | CCDC30     | 1.054203156 | 0.010589526 |
| ENSG00000174804  | FZD4       | 1.054220439 | 0.018905744 |
| ENSG00000144061  | NPHP1      | 1.0542275   | 0.001095978 |
| ENSG00000138375  | SMARCAL1   | 1.054247006 | 0.005745233 |
| ENSG00000168237  | GLYCTK     | 1.054259941 | 0.003018786 |
| ENSG00000008405  | CRY1       | 1.054302284 | 0.016904911 |
| ENSG00000176946  | THAP4      | 1.05430657  | 0.000260728 |
| ENSG00000170043  | TRAPPC1    | 1.054315052 | 0.041740747 |
| ENSG00000116691  | MIIP       | 1.054331004 | 6.05E-07    |
| ENSG000000085377 | PREP       | 1.054342793 | 0.006029791 |
| ENSG00000232859  | LYRM9      | 1.054346006 | 0.004588179 |
| ENSG00000253276  | CCDC71L    | 1.054363875 | 1.35E-05    |
| ENSG00000169436  | COL22A1    | 1.054378257 | 0.029165637 |
| ENSG00000161860  | SYCE2      | 1.05440779  | 0.010417084 |
| ENSG00000146918  | NCAPG2     | 1.054410347 | 0.049972468 |
| ENSG00000123388  | HOXC11     | 1.054503322 | 0.038169064 |
| ENSG00000269563  | AC138655.1 | 1.054523008 | 0.007679838 |
| ENSG00000125703  | ATG4C      | 1.054523237 | 0.027750601 |
| ENSG00000239697  | TNFSF12    | 1.05453763  | 0.000829801 |
| ENSG00000254827  | SLC22A18AS | 1.054554703 | 0.012439479 |
| ENSG00000163807  | KIAA1143   | 1.054571451 | 1.21E-05    |
| ENSG00000136699  | SMPD4      | 1.054636078 | 0.006974687 |
| ENSG00000100221  | JOSD1      | 1.05464195  | 0.01218145  |
| ENSG00000198315  | ZKSCAN8    | 1.054662081 | 0.001315088 |
| ENSG00000104960  | PTOV1      | 1.054672307 | 0.001372416 |
| ENSG00000166340  | TPP1       | 1.054675738 | 0.007468629 |
| ENSG00000120063  | GNA13      | 1.054712274 | 0.000339468 |
| ENSG00000137504  | CREBZF     | 1.054735395 | 0.002887234 |
| ENSG00000059377  | TBXAS1     | 1.054759963 | 0.013855508 |
| ENSG00000198646  | NCOA6      | 1.054786214 | 7.83E-07    |
| ENSG00000141568  | FOXK2      | 1.054824444 | 0.000176176 |
| ENSG00000196365  | LONP1      | 1.054826861 | 0.004014681 |

|                 |          |             |             |
|-----------------|----------|-------------|-------------|
| ENSG00000104679 | R3HCC1   | 1.0548718   | 0.00202192  |
| ENSG00000198265 | HELZ     | 1.054880561 | 0.011889831 |
| ENSG00000130787 | HIP1R    | 1.054958187 | 0.012121924 |
| ENSG00000143321 | HDGF     | 1.055001448 | 0.011439423 |
| ENSG00000158042 | MRPL17   | 1.055055789 | 0.026543686 |
| ENSG00000196275 | GTF2IRD2 | 1.055084439 | 0.012401817 |
| ENSG00000113448 | PDE4D    | 1.055148157 | 0.000496102 |
| ENSG00000131876 | SNRPA1   | 1.055184544 | 0.027879362 |
| ENSG00000138161 | CUZD1    | 1.055266654 | 0.048679921 |
| ENSG00000250479 | CHCHD10  | 1.055272345 | 0.045968561 |
| ENSG00000149435 | GGTLC1   | 1.055283941 | 0.012409912 |
| ENSG00000133488 | SEC14L4  | 1.055284329 | 0.005261892 |
| ENSG00000121621 | KIF18A   | 1.055340328 | 0.030746806 |
| ENSG00000131873 | CHSY1    | 1.055366491 | 0.004211807 |
| ENSG00000176473 | WDR25    | 1.055369421 | 0.000116163 |
| ENSG00000204574 | ABCF1    | 1.055373114 | 0.000529279 |
| ENSG00000163823 | CCR1     | 1.055396939 | 0.016589578 |
| ENSG00000198816 | ZNF358   | 1.055451601 | 0.000743485 |
| ENSG00000134453 | RBM17    | 1.055495197 | 3.05E-05    |
| ENSG00000204348 | DXO      | 1.055511054 | 0.000201891 |
| ENSG00000179886 | TIGD5    | 1.055520831 | 0.000124498 |
| ENSG00000180767 | CHST13   | 1.055538876 | 3.67E-05    |
| ENSG00000160993 | ALKBH4   | 1.055545699 | 0.000282003 |
| ENSG00000135636 | DYSF     | 1.055548892 | 0.017757212 |
| ENSG00000132300 | PTCD3    | 1.055557224 | 0.004542026 |
| ENSG00000170385 | SLC30A1  | 1.055613138 | 0.002020046 |
| ENSG00000213463 | SYNJ2BP  | 1.055627361 | 0.001088617 |
| ENSG00000175193 | PARL     | 1.055636861 | 0.038908521 |
| ENSG00000197114 | ZGPAT    | 1.055642002 | 0.000283994 |
| ENSG00000131269 | ABCB7    | 1.055702756 | 0.010941804 |
| ENSG00000130475 | FCHO1    | 1.055703352 | 0.000363127 |
| ENSG00000125962 | ARMCX5   | 1.055706909 | 0.018723619 |
| ENSG00000169554 | ZEB2     | 1.055712479 | 0.024194243 |
| ENSG00000170624 | SGCD     | 1.055716876 | 0.006227008 |
| ENSG00000080845 | DLGAP4   | 1.05573024  | 3.24E-05    |
| ENSG00000142546 | NOSIP    | 1.055750105 | 0.017343645 |
| ENSG00000130827 | PLXNA3   | 1.055760823 | 0.035974203 |
| ENSG00000151366 | NDUFC2   | 1.055770076 | 1.06E-05    |
| ENSG00000103343 | ZNF174   | 1.055776037 | 0.00019629  |
| ENSG00000243364 | EFNA4    | 1.055805296 | 0.024288138 |
| ENSG00000135269 | TES      | 1.055808437 | 0.004914559 |
| ENSG00000186166 | CCDC84   | 1.055819698 | 0.016873289 |
| ENSG00000172007 | RAB33B   | 1.055825214 | 0.026083409 |
| ENSG00000114656 | KIAA1257 | 1.055851734 | 0.002105025 |
| ENSG00000152253 | SPC25    | 1.055887416 | 0.032922629 |
| ENSG00000174353 | STAG3L3  | 1.055887976 | 0.014170977 |
| ENSG00000151914 | DST      | 1.055914434 | 0.015471306 |

|                 |          |             |             |
|-----------------|----------|-------------|-------------|
| ENSG00000079432 | CIC      | 1.055920614 | 4.41E-05    |
| ENSG00000103196 | CRISPLD2 | 1.055962742 | 0.012270988 |
| ENSG00000221955 | SLC12A8  | 1.055963585 | 0.020636526 |
| ENSG00000137700 | SLC37A4  | 1.055992583 | 0.000509035 |
| ENSG00000181220 | ZNF746   | 1.056000003 | 0.000674545 |
| ENSG00000011275 | RNF216   | 1.056033485 | 8.96E-06    |
| ENSG00000176142 | TMEM39A  | 1.056047968 | 0.000728524 |
| ENSG00000196196 | HRCT1    | 1.056055389 | 0.004720251 |
| ENSG00000144619 | CNTN4    | 1.056069638 | 0.01050321  |
| ENSG00000099308 | MAST3    | 1.056082782 | 0.020197527 |
| ENSG00000179294 | C17orf96 | 1.056092114 | 0.005958523 |
| ENSG00000132676 | DAP3     | 1.056114864 | 2.66E-06    |
| ENSG00000112149 | CD83     | 1.056144454 | 0.039534204 |
| ENSG00000113532 | ST8SIA4  | 1.056164055 | 0.019955978 |
| ENSG00000089692 | LAG3     | 1.056189894 | 0.00158644  |
| ENSG00000119203 | CPSF3    | 1.056197074 | 0.00791796  |
| ENSG00000087365 | SF3B2    | 1.056200718 | 0.001511993 |
| ENSG00000115541 | HSPE1    | 1.056211121 | 0.003502846 |
| ENSG00000091009 | RBM27    | 1.056258703 | 0.000272102 |
| ENSG00000115128 | SF3B14   | 1.056314064 | 0.004591996 |
| ENSG00000152147 | GEMIN6   | 1.056316655 | 0.01232393  |
| ENSG00000145022 | TCTA     | 1.056332068 | 0.036141691 |
| ENSG00000062370 | ZNF112   | 1.056343033 | 0.028344354 |
| ENSG00000071994 | PDCD2    | 1.056349109 | 0.006140497 |
| ENSG00000168569 | TMEM223  | 1.056355812 | 0.017062353 |
| ENSG00000162627 | SNX7     | 1.056375426 | 0.000437176 |
| ENSG00000177565 | TBL1XR1  | 1.056417816 | 0.000264052 |
| ENSG00000198960 | ARMCX6   | 1.056425775 | 0.001360637 |
| ENSG00000025796 | SEC63    | 1.056463464 | 0.000335643 |
| ENSG00000068394 | GPKOW    | 1.056507512 | 0.008189338 |
| ENSG00000048991 | R3HDM1   | 1.056529036 | 0.035981208 |
| ENSG00000166278 | C2       | 1.05653513  | 0.044837644 |
| ENSG00000242485 | MRPL20   | 1.056551965 | 0.000390968 |
| ENSG00000034510 | TMSB10   | 1.056561747 | 0.000260206 |
| ENSG00000124802 | EEF1E1   | 1.05656318  | 0.045129493 |
| ENSG00000196407 | THEM5    | 1.056567695 | 0.041000442 |
| ENSG00000213672 | NCKIPSD  | 1.056570123 | 0.046628842 |
| ENSG00000185267 | CDNF     | 1.056596953 | 0.002965309 |
| ENSG00000162396 | PARS2    | 1.056598406 | 7.49E-05    |
| ENSG00000108395 | TRIM37   | 1.056602554 | 0.001942253 |
| ENSG00000160888 | IER2     | 1.056653403 | 0.003724845 |
| ENSG00000168653 | NDUFS5   | 1.056656895 | 7.89E-05    |
| ENSG00000087884 | AAMDC    | 1.056741644 | 0.005347074 |
| ENSG00000147274 | RBMX     | 1.056758301 | 0.00061601  |
| ENSG00000106069 | CHN2     | 1.056766869 | 0.024057827 |
| ENSG00000065183 | WDR3     | 1.056771959 | 0.035432352 |
| ENSG00000081087 | OSTM1    | 1.05677617  | 0.047302257 |

|                 |          |             |             |
|-----------------|----------|-------------|-------------|
| ENSG00000136271 | DDX56    | 1.056785924 | 0.024787358 |
| ENSG00000122779 | TRIM24   | 1.056827773 | 0.011564455 |
| ENSG00000214022 | REPIN1   | 1.056843101 | 0.000160172 |
| ENSG00000171206 | TRIM8    | 1.056874586 | 0.000222224 |
| ENSG00000138430 | OLA1     | 1.056918057 | 0.000190732 |
| ENSG00000018699 | TTC27    | 1.056971545 | 0.018305683 |
| ENSG00000146776 | ATXN7L1  | 1.056985678 | 1.36E-05    |
| ENSG00000115762 | PLEKHB2  | 1.057017447 | 0.002519347 |
| ENSG00000089737 | DDX24    | 1.057026167 | 1.21E-05    |
| ENSG00000040933 | INPP4A   | 1.057061238 | 0.000247734 |
| ENSG00000134684 | YARS     | 1.057090929 | 0.009858906 |
| ENSG00000115816 | CEBPZ    | 1.057107914 | 0.00040349  |
| ENSG00000129810 | SGOL1    | 1.05714566  | 0.020387134 |
| ENSG00000151575 | TEX9     | 1.057154065 | 0.028072241 |
| ENSG00000169221 | TBC1D10B | 1.057193785 | 0.029512336 |
| ENSG00000172262 | ZNF131   | 1.057197455 | 0.016311621 |
| ENSG00000105127 | AKAP8    | 1.057214481 | 1.19E-05    |
| ENSG00000088256 | GNA11    | 1.057277743 | 0.000158887 |
| ENSG00000104899 | AMH      | 1.057295466 | 0.014054944 |
| ENSG00000131437 | KIF3A    | 1.057356102 | 0.031670175 |
| ENSG00000099991 | CABIN1   | 1.057392029 | 2.58E-05    |
| ENSG00000110104 | CCDC86   | 1.057428498 | 0.004013518 |
| ENSG00000161980 | POLR3K   | 1.05745081  | 0.003448794 |
| ENSG00000162434 | JAK1     | 1.05749618  | 0.031129128 |
| ENSG00000214063 | TSPAN4   | 1.057528847 | 0.004973562 |
| ENSG00000221883 | ARIH2OS  | 1.057539725 | 0.004773561 |
| ENSG00000166228 | PCBD1    | 1.057612486 | 0.003796721 |
| ENSG00000114013 | CD86     | 1.05764856  | 0.034047686 |
| ENSG00000151576 | QTRTD1   | 1.057655837 | 0.013161642 |
| ENSG00000198948 | MFAP3L   | 1.057664836 | 0.001617457 |
| ENSG00000159377 | PSMB4    | 1.057678267 | 0.009008915 |
| ENSG00000115307 | AUP1     | 1.05768996  | 0.028349073 |
| ENSG00000243927 | MRPS6    | 1.05772384  | 0.000138544 |
| ENSG00000158636 | C11orf30 | 1.057738333 | 0.013101368 |
| ENSG00000188493 | C19orf54 | 1.057781669 | 0.049277227 |
| ENSG00000047648 | ARHGAP6  | 1.057784318 | 0.045733467 |
| ENSG00000119285 | HEATR1   | 1.057788878 | 0.033757349 |
| ENSG00000150722 | PPP1R1C  | 1.057803559 | 0.045141933 |
| ENSG00000166974 | MAPRE2   | 1.057816255 | 0.008123441 |
| ENSG00000009950 | MLXIPL   | 1.057841097 | 0.000708496 |
| ENSG00000135469 | COQ10A   | 1.057842951 | 0.002307606 |
| ENSG00000007255 | TRAPPC6A | 1.057851158 | 0.00582688  |
| ENSG00000162521 | RBBP4    | 1.057929231 | 0.016643885 |
| ENSG00000109065 | NAT9     | 1.057956753 | 0.015790918 |
| ENSG00000065057 | NTHL1    | 1.057994374 | 0.005532237 |
| ENSG00000213066 | FGFR1OP  | 1.058016844 | 0.002747147 |
| ENSG00000175455 | CCDC14   | 1.05802257  | 0.000260502 |

|                 |           |             |             |
|-----------------|-----------|-------------|-------------|
| ENSG00000090686 | USP48     | 1.058022656 | 0.001608755 |
| ENSG00000120658 | ENOX1     | 1.058048127 | 0.013364206 |
| ENSG00000110931 | CAMKK2    | 1.058058575 | 1.36E-05    |
| ENSG00000011021 | CLCN6     | 1.05809524  | 0.004783976 |
| ENSG00000244038 | DDOST     | 1.058114131 | 0.002587319 |
| ENSG00000168005 | C11orf84  | 1.058163856 | 0.000535832 |
| ENSG00000110455 | ACCS      | 1.058184358 | 0.024157569 |
| ENSG00000172878 | METAP1D   | 1.058205175 | 0.005451102 |
| ENSG00000141378 | PTRH2     | 1.058210295 | 0.002686624 |
| ENSG00000105339 | DENND3    | 1.058218569 | 0.008282447 |
| ENSG00000173141 | MRP63     | 1.058219502 | 0.002602223 |
| ENSG00000103502 | CDIPT     | 1.058230158 | 9.76E-07    |
| ENSG00000112996 | MRPS30    | 1.058234642 | 0.016775961 |
| ENSG00000064933 | PMS1      | 1.058245144 | 0.003127754 |
| ENSG00000170801 | HTRA3     | 1.058268856 | 0.00254852  |
| ENSG00000103202 | NME4      | 1.05827221  | 0.015638405 |
| ENSG00000171488 | LRRC8C    | 1.058308723 | 0.009489306 |
| ENSG00000198837 | DENND4B   | 1.058340658 | 0.018512008 |
| ENSG00000170892 | TSEN34    | 1.058409365 | 0.000121951 |
| ENSG00000130304 | SLC27A1   | 1.058433962 | 0.019071392 |
| ENSG00000025772 | TOMM34    | 1.058445371 | 0.023249804 |
| ENSG00000010539 | ZNF200    | 1.058483005 | 0.004893364 |
| ENSG00000153898 | MCOLN2    | 1.058493874 | 0.046829349 |
| ENSG00000100490 | CDKL1     | 1.058496223 | 0.006681382 |
| ENSG00000114805 | PLCH1     | 1.058503956 | 1.43E-05    |
| ENSG00000113360 | DROSHA    | 1.058537207 | 0.019595392 |
| ENSG00000139793 | MBNL2     | 1.058564945 | 0.003618321 |
| ENSG00000168056 | LTBP3     | 1.058615739 | 0.037032877 |
| ENSG00000167523 | SPATA33   | 1.058618634 | 0.008328417 |
| ENSG00000004534 | RBM6      | 1.058656871 | 0.04039102  |
| ENSG00000149100 | EIF3M     | 1.058673255 | 0.015292638 |
| ENSG00000108700 | CCL8      | 1.058678511 | 0.047521189 |
| ENSG00000157349 | DDX19B    | 1.058681424 | 0.001271144 |
| ENSG00000108592 | FTSJ3     | 1.058708076 | 0.000136717 |
| ENSG00000114779 | ABHD14B   | 1.058749781 | 0.020596565 |
| ENSG00000119403 | PHF19     | 1.058763927 | 0.005328369 |
| ENSG00000104689 | TNFRSF10A | 1.058764676 | 0.010881145 |
| ENSG00000189376 | C8orf76   | 1.058793031 | 0.006801755 |
| ENSG00000162194 | C11orf48  | 1.058807333 | 0.011524015 |
| ENSG00000183067 | IGSF5     | 1.058822658 | 0.013631203 |
| ENSG00000176679 | TGIF2LY   | 1.05882837  | 0.019475092 |
| ENSG00000172572 | PDE3A     | 1.058845191 | 0.000300834 |
| ENSG00000159388 | BTG2      | 1.058858439 | 0.024229494 |
| ENSG00000132801 | ZSWIM3    | 1.058903587 | 1.13E-05    |
| ENSG00000103710 | RASL12    | 1.059036873 | 0.01273771  |
| ENSG00000152484 | USP12     | 1.059086496 | 0.004699196 |
| ENSG00000087206 | UIMC1     | 1.059095342 | 1.70E-05    |

|                 |               |             |             |
|-----------------|---------------|-------------|-------------|
| ENSG00000214367 | HAUS3         | 1.059134111 | 0.017673888 |
| ENSG00000125846 | ZNF133        | 1.059159086 | 0.009555705 |
| ENSG00000164045 | CDC25A        | 1.059180053 | 0.00447471  |
| ENSG00000035664 | DAPK2         | 1.059181879 | 0.010423732 |
| ENSG00000105778 | AVL9          | 1.059211213 | 0.012989464 |
| ENSG00000187147 | RNF220        | 1.059284999 | 0.000370414 |
| ENSG00000121988 | ZRANB3        | 1.059314914 | 0.000240805 |
| ENSG00000130479 | MAP1S         | 1.059316714 | 0.015740915 |
| ENSG00000107175 | CREB3         | 1.05933093  | 0.00573659  |
| ENSG00000167550 | RHEBL1        | 1.059340647 | 0.000123254 |
| ENSG00000073536 | NLE1          | 1.059364624 | 0.006157554 |
| ENSG00000153157 | SYCP2L        | 1.059414181 | 0.001305048 |
| ENSG00000137414 | FAM8A1        | 1.059445857 | 0.004027698 |
| ENSG00000143256 | PFDN2         | 1.059455905 | 0.007481583 |
| ENSG00000164985 | PSIP1         | 1.059457252 | 0.040305751 |
| ENSG00000061273 | HDAC7         | 1.059470524 | 0.001343637 |
| ENSG00000184374 | COLEC10       | 1.059490186 | 0.033619984 |
| ENSG00000179832 | MROH1         | 1.059512551 | 0.005368033 |
| ENSG00000268953 | AC020952.1    | 1.059525459 | 0.008890406 |
| ENSG00000172172 | MRPL13        | 1.059557931 | 0.043608949 |
| ENSG00000174579 | MSL2          | 1.0595962   | 0.023680373 |
| ENSG00000125503 | PPP1R12C      | 1.059613517 | 0.000633327 |
| ENSG00000064999 | ANKS1A        | 1.059671666 | 3.86E-05    |
| ENSG00000160606 | TLCD1         | 1.059737886 | 0.033862972 |
| ENSG00000128591 | FLNC          | 1.059747092 | 0.011791595 |
| ENSG00000182534 | MXRA7         | 1.059766509 | 0.001759684 |
| ENSG00000205502 | C2CD4B        | 1.059768596 | 0.0009274   |
| ENSG00000118894 | FAM86A        | 1.059805247 | 0.005442029 |
| ENSG00000105438 | KDELRL1       | 1.059810085 | 0.001285381 |
| ENSG00000095587 | TLL2          | 1.059815392 | 0.002645083 |
| ENSG00000134265 | NAPG          | 1.059835919 | 0.000391199 |
| ENSG00000167861 | HID1          | 1.059836247 | 0.000612042 |
| ENSG00000205664 | RP11-706O15.1 | 1.059837217 | 0.032793454 |
| ENSG00000174173 | TRMT10C       | 1.059848576 | 0.018601214 |
| ENSG00000034677 | RNF19A        | 1.059858689 | 0.000141532 |
| ENSG00000128283 | CDC42EP1      | 1.059862167 | 0.002041586 |
| ENSG00000204237 | OXLD1         | 1.059864601 | 0.001525308 |
| ENSG00000110446 | SLC15A3       | 1.059872938 | 0.00968725  |
| ENSG00000137261 | KIAA0319      | 1.059922921 | 0.001777223 |
| ENSG00000153560 | UBP1          | 1.059951778 | 1.25E-05    |
| ENSG00000080345 | RIF1          | 1.059953743 | 1.44E-06    |
| ENSG00000105819 | PMPCB         | 1.059981138 | 0.000127777 |
| ENSG00000232237 | ASCL5         | 1.059987776 | 0.002103641 |
| ENSG00000231292 | IGKV1OR2-108  | 1.060020798 | 0.028211296 |
| ENSG00000179958 | DCTPP1        | 1.060038072 | 0.001965445 |
| ENSG00000013374 | NUB1          | 1.060044744 | 1.44E-05    |
| ENSG00000144481 | TRPM8         | 1.060048652 | 0.003966974 |

|                 |          |             |             |
|-----------------|----------|-------------|-------------|
| ENSG00000205542 | TMSB4X   | 1.060078345 | 0.002123665 |
| ENSG00000160199 | PKNOX1   | 1.060081008 | 8.30E-05    |
| ENSG00000196199 | MPHOSPH8 | 1.060090881 | 0.000519089 |
| ENSG00000163993 | S100P    | 1.060112119 | 0.004182166 |
| ENSG00000163607 | GTPBP8   | 1.06011924  | 0.048066881 |
| ENSG00000197457 | STMN3    | 1.060122272 | 0.004185443 |
| ENSG00000101680 | LAMA1    | 1.060147435 | 0.03235964  |
| ENSG00000110344 | UBE4A    | 1.060154084 | 6.32E-05    |
| ENSG00000084652 | TXLNA    | 1.060154403 | 0.045340044 |
| ENSG00000042062 | FAM65C   | 1.06017855  | 0.001065826 |
| ENSG00000198355 | PIM3     | 1.060185783 | 6.08E-05    |
| ENSG00000188807 | TMEM201  | 1.060197496 | 0.000448897 |
| ENSG00000133131 | MORC4    | 1.060217642 | 0.036837609 |
| ENSG00000130402 | ACTN4    | 1.060218982 | 0.001822806 |
| ENSG00000105793 | GTPBP10  | 1.060224688 | 0.035954397 |
| ENSG00000129654 | FOXJ1    | 1.060271102 | 0.027047461 |
| ENSG00000116396 | KCNC4    | 1.060311392 | 0.008834665 |
| ENSG00000127507 | EMR2     | 1.060367001 | 0.005861508 |
| ENSG00000185813 | PCYT2    | 1.06038058  | 0.000634881 |
| ENSG00000172115 | CYCS     | 1.060406441 | 0.030697755 |
| ENSG00000166902 | MRPL16   | 1.060426153 | 0.001886798 |
| ENSG00000103042 | SLC38A7  | 1.060427466 | 0.006367872 |
| ENSG00000154803 | FLCN     | 1.060482027 | 0.010530412 |
| ENSG00000116285 | ERRF1    | 1.060486366 | 0.021170952 |
| ENSG00000197275 | RAD54B   | 1.060535805 | 0.032972445 |
| ENSG00000116478 | HDAC1    | 1.060563237 | 0.002726521 |
| ENSG00000074370 | ATP2A3   | 1.060563578 | 0.011187664 |
| ENSG00000136856 | SLC2A8   | 1.060572865 | 0.011421135 |
| ENSG00000141179 | PCTP     | 1.060611026 | 0.006070071 |
| ENSG00000152332 | UHMK1    | 1.060616981 | 0.001061829 |
| ENSG00000164168 | TMEM184C | 1.060642965 | 7.34E-05    |
| ENSG00000167967 | E4F1     | 1.060651833 | 0.000198381 |
| ENSG00000101945 | SUV39H1  | 1.060665179 | 0.004573873 |
| ENSG00000070495 | JMJD6    | 1.060669598 | 9.23E-06    |
| ENSG00000169926 | KLF13    | 1.06068015  | 0.00309568  |
| ENSG00000050748 | MAPK9    | 1.060699705 | 0.000105015 |
| ENSG00000171433 | GLOD5    | 1.060747883 | 0.003908559 |
| ENSG00000187773 | FAM69C   | 1.060764372 | 0.029885127 |
| ENSG00000163950 | SLBP     | 1.060800554 | 0.003539785 |
| ENSG00000169188 | APEX2    | 1.060802493 | 0.000804584 |
| ENSG00000128833 | MYO5C    | 1.060849342 | 0.008426953 |
| ENSG00000214300 | SPDYE3   | 1.060874997 | 0.019520592 |
| ENSG00000091482 | SMPX     | 1.060880594 | 0.021461279 |
| ENSG00000143190 | POU2F1   | 1.060887773 | 0.029288617 |
| ENSG00000127603 | MACF1    | 1.060935339 | 9.81E-05    |
| ENSG00000111785 | RIC8B    | 1.060936223 | 0.000317274 |
| ENSG00000106367 | AP1S1    | 1.060945262 | 0.034847044 |

|                 |          |             |             |
|-----------------|----------|-------------|-------------|
| ENSG00000138175 | ARL3     | 1.060945934 | 0.000130766 |
| ENSG00000171421 | MRPL36   | 1.060954846 | 0.001251035 |
| ENSG00000168772 | CXXC4    | 1.060960208 | 0.000908058 |
| ENSG00000204632 | HLA-G    | 1.060977252 | 0.002195915 |
| ENSG00000160293 | VAV2     | 1.06099144  | 0.000362042 |
| ENSG00000090863 | GLG1     | 1.061010499 | 0.001069921 |
| ENSG00000164494 | PDSS2    | 1.061078794 | 0.011776644 |
| ENSG00000103269 | RHBDL1   | 1.061116977 | 0.00366444  |
| ENSG00000172671 | ZFAND4   | 1.06111785  | 0.004533722 |
| ENSG00000180370 | PAK2     | 1.061148812 | 6.29E-05    |
| ENSG00000168275 | COA6     | 1.061155096 | 9.66E-06    |
| ENSG00000166526 | ZNF3     | 1.06116317  | 0.04638653  |
| ENSG00000168994 | PXDC1    | 1.061204137 | 0.003862171 |
| ENSG00000090339 | ICAM1    | 1.061227709 | 0.003794694 |
| ENSG00000131116 | ZNF428   | 1.061234404 | 3.08E-05    |
| ENSG00000198586 | TLK1     | 1.061239575 | 2.53E-06    |
| ENSG00000157470 | FAM81A   | 1.06124149  | 0.002689041 |
| ENSG00000156140 | ADAMTS3  | 1.061279895 | 0.011117656 |
| ENSG00000149179 | C11orf49 | 1.061289226 | 0.005057977 |
| ENSG00000108298 | RPL19    | 1.061324829 | 1.32E-05    |
| ENSG00000143033 | MTF2     | 1.06135142  | 0.018491967 |
| ENSG00000163618 | CADPS    | 1.061388256 | 0.002232664 |
| ENSG00000258890 | CEP95    | 1.061398513 | 0.022638727 |
| ENSG00000113460 | BRX1     | 1.061401551 | 0.039813378 |
| ENSG00000117650 | NEK2     | 1.061428727 | 0.011648444 |
| ENSG00000109610 | SOD3     | 1.061434133 | 0.007005337 |
| ENSG00000244405 | ETV5     | 1.061483599 | 5.03E-05    |
| ENSG00000132768 | DPH2     | 1.061521677 | 0.000961818 |
| ENSG00000102384 | CENPI    | 1.061522792 | 0.002978135 |
| ENSG00000155959 | VBP1     | 1.061526806 | 0.001177081 |
| ENSG00000060982 | BCAT1    | 1.061555846 | 0.049438819 |
| ENSG00000196843 | ARID5A   | 1.061596247 | 0.042251098 |
| ENSG00000135837 | CEP350   | 1.061606627 | 0.000516798 |
| ENSG00000196981 | WDR5B    | 1.061607907 | 0.048064171 |
| ENSG00000011478 | QPCTL    | 1.061609875 | 0.000160166 |
| ENSG00000136243 | NUPL2    | 1.061659368 | 0.000783287 |
| ENSG00000169733 | RFNG     | 1.06167533  | 0.002421185 |
| ENSG00000103121 | CMC2     | 1.061759604 | 0.009910404 |
| ENSG00000164754 | RAD21    | 1.061763817 | 0.000970112 |
| ENSG00000081059 | TCF7     | 1.061795929 | 0.004107141 |
| ENSG00000114854 | TNNC1    | 1.061821157 | 0.002780837 |
| ENSG00000151466 | SCLT1    | 1.061837937 | 0.001564962 |
| ENSG00000185627 | PSMD13   | 1.061866013 | 0.006430307 |
| ENSG00000257704 | PRR24    | 1.061876462 | 0.001392642 |
| ENSG00000104886 | PLEKHJ1  | 1.061912574 | 0.029706503 |
| ENSG00000129277 | CCL4     | 1.061938896 | 0.015366327 |
| ENSG00000118420 | UBE3D    | 1.061954988 | 0.000552835 |

|                 |          |             |             |
|-----------------|----------|-------------|-------------|
| ENSG00000121774 | KHDRBS1  | 1.061976664 | 0.042689341 |
| ENSG00000206538 | VGLL3    | 1.061979779 | 0.032209396 |
| ENSG00000128928 | IVD      | 1.06198341  | 0.001562677 |
| ENSG00000122257 | RBBP6    | 1.062004506 | 0.000391034 |
| ENSG00000120332 | TNN      | 1.062060882 | 0.049592986 |
| ENSG00000047579 | DTNBP1   | 1.062062501 | 0.019533784 |
| ENSG00000204392 | LSM2     | 1.062073092 | 0.00299855  |
| ENSG00000124155 | PIGT     | 1.062079879 | 0.008384703 |
| ENSG00000166822 | TMEM170A | 1.06210865  | 1.87E-05    |
| ENSG00000153310 | FAM49B   | 1.062109372 | 0.032031929 |
| ENSG00000149084 | HSD17B12 | 1.062117699 | 0.000165604 |
| ENSG00000197043 | ANXA6    | 1.062128163 | 0.019401551 |
| ENSG00000148337 | CIZ1     | 1.062140251 | 0.000309021 |
| ENSG00000130826 | DKC1     | 1.062155114 | 0.001666059 |
| ENSG00000174851 | YIF1A    | 1.062217797 | 0.016843541 |
| ENSG00000167748 | KLK1     | 1.062273306 | 0.002562147 |
| ENSG00000148459 | PDSS1    | 1.062286227 | 0.009077425 |
| ENSG00000091972 | CD200    | 1.062296615 | 0.00431553  |
| ENSG00000165516 | KLHDC2   | 1.062304813 | 0.000760836 |
| ENSG00000148942 | SLC5A12  | 1.062321286 | 0.000942522 |
| ENSG00000149932 | TMEM219  | 1.06232239  | 0.002282697 |
| ENSG00000197771 | MCMBP    | 1.062359736 | 0.04204686  |
| ENSG00000168936 | TMEM129  | 1.062407535 | 0.00258167  |
| ENSG00000244005 | NFS1     | 1.062441811 | 0.029703447 |
| ENSG00000138100 | TRIM54   | 1.062443195 | 0.012881891 |
| ENSG00000101463 | SYNDIG1  | 1.062444104 | 0.048958145 |
| ENSG00000128891 | C15orf57 | 1.062465051 | 3.83E-05    |
| ENSG00000128512 | DOCK4    | 1.062465389 | 0.043953194 |
| ENSG00000120800 | UTP20    | 1.062489388 | 0.019470363 |
| ENSG00000111348 | ARHGDI1B | 1.0625044   | 0.024373152 |
| ENSG00000000419 | DPM1     | 1.062511489 | 0.000422722 |
| ENSG00000010810 | FYN      | 1.062531113 | 0.027740478 |
| ENSG00000110057 | UNC93B1  | 1.062543876 | 0.008821969 |
| ENSG00000131759 | RARA     | 1.062544306 | 9.24E-06    |
| ENSG00000109685 | WHSC1    | 1.062545854 | 0.006745633 |
| ENSG00000115875 | SRSF7    | 1.062618341 | 0.020105305 |
| ENSG00000138709 | LARP1B   | 1.062681398 | 0.000985791 |
| ENSG00000171729 | TMEM51   | 1.062721925 | 0.027361039 |
| ENSG00000006015 | C19orf60 | 1.06272854  | 0.026177361 |
| ENSG00000130254 | SAFB2    | 1.062779088 | 0.013245335 |
| ENSG00000104522 | TSTA3    | 1.062788656 | 0.035567223 |
| ENSG00000166321 | NUDT13   | 1.062820195 | 0.025693871 |
| ENSG00000171864 | PRND     | 1.062832182 | 0.019006239 |
| ENSG00000149474 | CSRP2BP  | 1.06285     | 0.013564031 |
| ENSG00000174684 | B3GNT1   | 1.062858484 | 0.000933881 |
| ENSG00000130675 | MNX1     | 1.062861093 | 0.009917444 |
| ENSG00000166860 | ZBTB39   | 1.06287433  | 0.003938636 |

|                 |         |             |             |
|-----------------|---------|-------------|-------------|
| ENSG00000041802 | LSG1    | 1.062892931 | 0.006311908 |
| ENSG00000137507 | LRRC32  | 1.062929012 | 0.04309658  |
| ENSG00000173137 | ADCK5   | 1.062949704 | 0.001066446 |
| ENSG00000185875 | THNSL1  | 1.062976556 | 0.005632247 |
| ENSG00000099330 | OCEL1   | 1.062982743 | 0.000352559 |
| ENSG00000196187 | TMEM63A | 1.062993649 | 0.005043058 |
| ENSG00000111052 | LIN7A   | 1.062994569 | 0.03950165  |
| ENSG00000055483 | USP36   | 1.06306939  | 0.021300094 |
| ENSG00000167635 | ZNF146  | 1.06307245  | 0.001182077 |
| ENSG00000100209 | HSCB    | 1.063110525 | 0.000754561 |
| ENSG00000115525 | ST3GAL5 | 1.063110863 | 0.00530925  |
| ENSG00000115415 | STAT1   | 1.063156263 | 0.037561865 |
| ENSG00000160111 | CPAMD8  | 1.063174405 | 0.006740396 |
| ENSG00000132780 | NASP    | 1.063178639 | 0.008013676 |
| ENSG00000111321 | LTBR    | 1.063222828 | 0.000149535 |
| ENSG00000037042 | TUBG2   | 1.063297485 | 0.01285657  |
| ENSG00000113319 | RASGRF2 | 1.063301606 | 0.025656658 |
| ENSG00000162642 | C1orf52 | 1.063326493 | 0.000131947 |
| ENSG00000135404 | CD63    | 1.063369808 | 0.000114752 |
| ENSG00000163481 | RNF25   | 1.063371169 | 0.000242601 |
| ENSG00000096654 | ZNF184  | 1.063385711 | 0.019633618 |
| ENSG00000164303 | ENPP6   | 1.063397744 | 0.020139279 |
| ENSG00000213780 | GTF2H4  | 1.063403303 | 0.005919361 |
| ENSG00000198042 | MAK16   | 1.063412605 | 0.011758772 |
| ENSG00000104472 | CHRAC1  | 1.063491243 | 0.001281484 |
| ENSG00000174100 | MRPL45  | 1.063500203 | 0.008342371 |
| ENSG00000196455 | PIK3R4  | 1.063506293 | 0.000375309 |
| ENSG00000091651 | ORC6    | 1.063522894 | 0.033311057 |
| ENSG00000166913 | YWHAB   | 1.063534079 | 0.020027334 |
| ENSG00000164008 | C1orf50 | 1.063538282 | 0.000302943 |
| ENSG00000204560 | DHX16   | 1.063557269 | 0.000215016 |
| ENSG00000123191 | ATP7B   | 1.063575915 | 0.025644947 |
| ENSG00000175318 | GRAMD2  | 1.063598247 | 0.024935414 |
| ENSG00000213719 | CLIC1   | 1.063658189 | 0.002447151 |
| ENSG00000178917 | ZNF852  | 1.063698823 | 0.008461863 |
| ENSG00000198077 | CYP2A7  | 1.063700164 | 9.48E-05    |
| ENSG00000165138 | ANKS6   | 1.063749217 | 0.000267519 |
| ENSG00000141504 | SAT2    | 1.063770703 | 0.002125968 |
| ENSG00000092020 | PPP2R3C | 1.063774019 | 0.001106413 |
| ENSG00000136247 | ZDHHC4  | 1.063785141 | 4.05E-06    |
| ENSG00000128045 | RASL11B | 1.063787972 | 0.017633619 |
| ENSG00000171169 | NAIF1   | 1.063815248 | 0.000447985 |
| ENSG00000106608 | URGCP   | 1.063861435 | 0.006625829 |
| ENSG00000225614 | ZNF469  | 1.063894805 | 0.000101153 |
| ENSG00000187522 | HSPA14  | 1.06389834  | 3.83E-05    |
| ENSG00000132196 | HSD17B7 | 1.063916559 | 0.022931394 |
| ENSG00000088882 | CPXM1   | 1.063931953 | 0.011845418 |

|                 |              |             |             |
|-----------------|--------------|-------------|-------------|
| ENSG00000130813 | C19orf66     | 1.06393938  | 0.001153519 |
| ENSG00000139890 | REM2         | 1.06399481  | 0.004958777 |
| ENSG00000158417 | EIF5B        | 1.06401617  | 0.000161325 |
| ENSG00000187736 | NHEJ1        | 1.064035785 | 0.001963864 |
| ENSG00000164080 | RAD54L2      | 1.064055321 | 0.000434088 |
| ENSG00000173744 | AGFG1        | 1.064092439 | 1.04E-05    |
| ENSG00000164105 | SAP30        | 1.064093157 | 0.000674674 |
| ENSG00000151287 | TEX30        | 1.064095046 | 0.008490867 |
| ENSG00000163468 | CCT3         | 1.064101217 | 0.000865233 |
| ENSG00000033100 | CHPF2        | 1.064102102 | 0.010469067 |
| ENSG00000151617 | EDNRA        | 1.064140024 | 0.02845293  |
| ENSG00000110713 | NUP98        | 1.064140379 | 0.001629532 |
| ENSG00000205323 | SARNP        | 1.064140479 | 0.000206204 |
| ENSG00000184281 | TSSC4        | 1.06417071  | 0.000364112 |
| ENSG00000184838 | PRR16        | 1.064215899 | 0.009074151 |
| ENSG00000116001 | TIA1         | 1.064227595 | 0.03780834  |
| ENSG00000171860 | C3AR1        | 1.064260433 | 0.034081887 |
| ENSG00000115392 | FANCL        | 1.064289887 | 0.00020601  |
| ENSG00000198610 | AKR1C4       | 1.064306599 | 0.023499834 |
| ENSG00000100105 | PATZ1        | 1.064313951 | 1.62E-08    |
| ENSG00000115364 | MRPL19       | 1.064317754 | 0.011945796 |
| ENSG00000027869 | SH2D2A       | 1.064321351 | 0.016565654 |
| ENSG00000115425 | PECR         | 1.064366403 | 7.36E-06    |
| ENSG00000181090 | EHMT1        | 1.064399447 | 7.25E-05    |
| ENSG00000184640 | 9-Sep        | 1.064403897 | 0.004484388 |
| ENSG00000198900 | TOP1         | 1.064407592 | 4.61E-06    |
| ENSG00000109586 | GALNT7       | 1.064565509 | 0.001139025 |
| ENSG00000126218 | F10          | 1.064571016 | 0.012889182 |
| ENSG00000177335 | C8orf31      | 1.064592667 | 0.014806545 |
| ENSG00000259305 | ZHX1-C8ORF76 | 1.064625309 | 0.03605933  |
| ENSG00000156398 | SFXN2        | 1.064672087 | 0.002735575 |
| ENSG00000163006 | CCDC138      | 1.064721872 | 0.019467869 |
| ENSG00000173214 | KIAA1919     | 1.064734045 | 0.000499253 |
| ENSG00000126953 | TIMM8A       | 1.064740362 | 0.016381589 |
| ENSG00000125409 | TEKT3        | 1.064748207 | 0.000471245 |
| ENSG00000159363 | ATP13A2      | 1.06476163  | 0.03014189  |
| ENSG00000173557 | C2orf70      | 1.064807874 | 0.000576704 |
| ENSG00000116213 | WRAP73       | 1.064825191 | 0.000186061 |
| ENSG00000269858 | EGLN2        | 1.064834413 | 0.003159019 |
| ENSG00000113811 | SELK         | 1.064836057 | 1.87E-06    |
| ENSG00000212734 | C17orf100    | 1.064841921 | 0.003515035 |
| ENSG00000116670 | MAD2L2       | 1.064915815 | 0.007901922 |
| ENSG00000164087 | POC1A        | 1.064974154 | 0.000105648 |
| ENSG00000124172 | ATP5E        | 1.064979485 | 5.92E-10    |
| ENSG00000114026 | OGG1         | 1.065010135 | 4.35E-06    |
| ENSG00000148396 | SEC16A       | 1.065010702 | 0.012975207 |
| ENSG00000124664 | SPDEF        | 1.065026651 | 0.000689524 |

|                 |          |             |             |
|-----------------|----------|-------------|-------------|
| ENSG00000140990 | NDUFB10  | 1.065053317 | 0.000317708 |
| ENSG00000170852 | KBTBD2   | 1.065074953 | 0.029599276 |
| ENSG00000154079 | C6orf57  | 1.065097037 | 0.003853489 |
| ENSG00000101109 | STK4     | 1.065114168 | 0.000152894 |
| ENSG00000127586 | CHTF18   | 1.065154211 | 0.00635092  |
| ENSG00000089775 | ZBTB25   | 1.065158487 | 0.002934377 |
| ENSG00000115966 | ATF2     | 1.065177154 | 0.00025639  |
| ENSG00000135451 | TROAP    | 1.065207106 | 0.000160534 |
| ENSG00000108262 | GIT1     | 1.065230421 | 5.97E-05    |
| ENSG00000129636 | ITFG1    | 1.065237168 | 0.001006659 |
| ENSG00000129566 | TEP1     | 1.065294146 | 0.006759224 |
| ENSG00000006194 | ZNF263   | 1.065300811 | 0.008000744 |
| ENSG00000126768 | TIMM17B  | 1.065310499 | 0.0004073   |
| ENSG00000104852 | SNRNP70  | 1.065344689 | 0.00801794  |
| ENSG00000185115 | NDNL2    | 1.06534503  | 0.004868725 |
| ENSG00000187145 | MRPS21   | 1.065345679 | 1.20E-07    |
| ENSG00000106554 | CHCHD3   | 1.065365347 | 0.024068631 |
| ENSG00000142453 | CARM1    | 1.065393147 | 2.14E-06    |
| ENSG00000151233 | GXYLT1   | 1.065414339 | 0.01380872  |
| ENSG00000105323 | HNRNPUL1 | 1.065426379 | 0.000174665 |
| ENSG00000119138 | KLF9     | 1.065439551 | 0.000118379 |
| ENSG00000166813 | KIF7     | 1.065524685 | 0.001675435 |
| ENSG00000148362 | C9orf142 | 1.065582941 | 0.000139218 |
| ENSG00000075213 | SEMA3A   | 1.065605252 | 0.031815954 |
| ENSG00000125885 | MCM8     | 1.065620501 | 0.000287307 |
| ENSG00000156983 | BRPF1    | 1.065635764 | 1.64E-05    |
| ENSG00000013392 | RWDD2A   | 1.065657068 | 0.003271009 |
| ENSG00000143314 | MRPL24   | 1.065681585 | 0.00137509  |
| ENSG00000116649 | SRM      | 1.065723591 | 0.001024166 |
| ENSG00000049656 | CLPTM1L  | 1.065726859 | 4.51E-06    |
| ENSG00000015532 | XYLT2    | 1.065735492 | 0.033693262 |
| ENSG00000101216 | GMEB2    | 1.065751833 | 1.11E-06    |
| ENSG00000163482 | STK36    | 1.065752109 | 0.002311764 |
| ENSG00000140577 | CRTC3    | 1.065760521 | 0.000252001 |
| ENSG00000203896 | LIME1    | 1.065789713 | 0.007597356 |
| ENSG00000161091 | MFSD12   | 1.06583324  | 0.006284407 |
| ENSG00000146576 | C7orf26  | 1.065833381 | 2.35E-07    |
| ENSG00000180628 | PCGF5    | 1.065844231 | 0.004948321 |
| ENSG00000203711 | C6orf99  | 1.065882593 | 0.016176844 |
| ENSG00000148290 | SURF1    | 1.065893507 | 0.000322859 |
| ENSG00000143870 | PDIA6    | 1.065912402 | 0.025383622 |
| ENSG00000182606 | TRAK1    | 1.065986791 | 0.043196412 |
| ENSG00000107937 | GTPBP4   | 1.066017402 | 0.00781015  |
| ENSG00000184557 | SOCS3    | 1.066026178 | 0.000106697 |
| ENSG00000164683 | HEY1     | 1.066036605 | 0.022561546 |
| ENSG00000016864 | GLT8D1   | 1.066041432 | 0.024865654 |
| ENSG00000137522 | RNF121   | 1.066059282 | 0.003544442 |

|                 |            |             |             |
|-----------------|------------|-------------|-------------|
| ENSG00000164124 | TMEM144    | 1.066061504 | 0.001816528 |
| ENSG00000170369 | CST2       | 1.066075891 | 0.000468544 |
| ENSG00000072135 | PTPN18     | 1.066098818 | 0.003947405 |
| ENSG00000017260 | ATP2C1     | 1.066112509 | 0.0090691   |
| ENSG00000156232 | WHAMM      | 1.066116906 | 0.005328725 |
| ENSG00000198860 | TSEN15     | 1.066137521 | 0.00431728  |
| ENSG00000222001 | AC106876.2 | 1.066159193 | 0.00708502  |
| ENSG00000198420 | FAM115A    | 1.066180634 | 0.001825451 |
| ENSG00000131069 | ACSS2      | 1.066184779 | 0.003529656 |
| ENSG00000134575 | ACP2       | 1.066191204 | 0.003584981 |
| ENSG00000152939 | MARVELD2   | 1.066228208 | 6.84E-05    |
| ENSG00000159674 | SPON2      | 1.06624215  | 0.01508424  |
| ENSG00000132541 | HRSP12     | 1.066243502 | 0.003263171 |
| ENSG00000153015 | CWC27      | 1.066255117 | 0.000501301 |
| ENSG00000168393 | DTYMK      | 1.066299483 | 0.009415201 |
| ENSG00000137462 | TLR2       | 1.066317147 | 0.012173232 |
| ENSG00000138443 | ABI2       | 1.066323203 | 3.35E-07    |
| ENSG00000140451 | PIF1       | 1.066340182 | 0.01413575  |
| ENSG00000102710 | SUPT20H    | 1.066346512 | 0.001414041 |
| ENSG00000120802 | TMPO       | 1.066395858 | 0.002102945 |
| ENSG00000089597 | GANAB      | 1.066404217 | 9.41E-05    |
| ENSG00000137200 | CMTR1      | 1.066421864 | 9.87E-05    |
| ENSG00000176919 | C8G        | 1.066443325 | 0.00074198  |
| ENSG00000124214 | STAU1      | 1.066446565 | 0.030742074 |
| ENSG00000123575 | FAM199X    | 1.066461439 | 0.00044916  |
| ENSG00000188994 | ZNF292     | 1.066461913 | 0.007997239 |
| ENSG00000135966 | TGFBRAP1   | 1.066524761 | 3.63E-07    |
| ENSG00000020426 | MNAT1      | 1.066535698 | 0.003758204 |
| ENSG00000153201 | RANBP2     | 1.066583027 | 0.000160165 |
| ENSG00000151176 | PLBD2      | 1.066615372 | 1.85E-05    |
| ENSG00000173480 | ZNF417     | 1.06663235  | 0.000300252 |
| ENSG00000120885 | CLU        | 1.066686206 | 0.046885256 |
| ENSG00000157106 | SMG1       | 1.066688235 | 0.000256185 |
| ENSG00000168096 | ANKS3      | 1.066716635 | 2.48E-05    |
| ENSG00000121390 | PSPC1      | 1.066725658 | 0.023760159 |
| ENSG00000105011 | ASF1B      | 1.066777379 | 0.009514936 |
| ENSG00000132359 | RAP1GAP2   | 1.066796212 | 0.013564568 |
| ENSG00000204519 | ZNF551     | 1.066918009 | 0.012637189 |
| ENSG00000005483 | KMT2E      | 1.06701809  | 0.000682802 |
| ENSG00000204219 | TCEA3      | 1.067061196 | 0.005021912 |
| ENSG00000179913 | B3GNT3     | 1.06706469  | 0.034733244 |
| ENSG00000183207 | RUVBL2     | 1.067154296 | 0.001196349 |
| ENSG00000101134 | DOK5       | 1.067170018 | 0.014664683 |
| ENSG00000151883 | PARP8      | 1.06718998  | 0.024457302 |
| ENSG00000080298 | RFX3       | 1.067228716 | 0.000587145 |
| ENSG00000164631 | ZNF12      | 1.067228874 | 0.011044971 |
| ENSG00000051180 | RAD51      | 1.067255633 | 0.005447201 |

|                 |          |             |             |
|-----------------|----------|-------------|-------------|
| ENSG00000174227 | PIGG     | 1.067326722 | 0.017637416 |
| ENSG00000122386 | ZNF205   | 1.067337602 | 0.000836732 |
| ENSG00000143811 | PYCR2    | 1.067410871 | 0.002604212 |
| ENSG00000128595 | CALU     | 1.067432377 | 9.58E-05    |
| ENSG00000131871 | VIMP     | 1.067508414 | 1.52E-05    |
| ENSG00000125817 | CENPB    | 1.06752713  | 0.002026577 |
| ENSG00000102053 | ZC3H12B  | 1.067558486 | 0.001787493 |
| ENSG00000133627 | ACTR3B   | 1.067574023 | 0.01607174  |
| ENSG00000153574 | RPIA     | 1.067585757 | 0.045590374 |
| ENSG00000119280 | C1orf198 | 1.067592434 | 2.25E-05    |
| ENSG00000028839 | TBPL1    | 1.067593429 | 0.00187164  |
| ENSG00000148700 | ADD3     | 1.067661984 | 0.000218432 |
| ENSG00000113721 | PDGFRB   | 1.067759988 | 0.010057357 |
| ENSG00000165175 | MID1IP1  | 1.067762151 | 0.034249742 |
| ENSG00000188677 | PARVB    | 1.067784043 | 0.000978224 |
| ENSG00000135999 | EPC2     | 1.067797587 | 0.000285181 |
| ENSG00000106078 | COBL     | 1.067837538 | 0.001667363 |
| ENSG00000139131 | YARS2    | 1.067840321 | 0.00515548  |
| ENSG00000122687 | FTSJ2    | 1.067907396 | 0.005606513 |
| ENSG00000132429 | POPDC3   | 1.067946739 | 0.046751872 |
| ENSG00000111602 | TIMELESS | 1.068047121 | 0.022745861 |
| ENSG00000105968 | H2AFV    | 1.068093388 | 0.000133942 |
| ENSG00000163291 | PAQR3    | 1.068135339 | 0.014440604 |
| ENSG00000107938 | EDRF1    | 1.068144398 | 0.000248166 |
| ENSG00000003147 | ICA1     | 1.068145935 | 0.000701685 |
| ENSG00000112715 | VEGFA    | 1.068155165 | 0.032299651 |
| ENSG00000165868 | HSPA12A  | 1.068189065 | 0.017573188 |
| ENSG00000119899 | SLC17A5  | 1.068208559 | 0.030015648 |
| ENSG00000182240 | BACE2    | 1.068235027 | 0.021663501 |
| ENSG00000132256 | TRIM5    | 1.068266819 | 0.006049517 |
| ENSG00000121851 | POLR3GL  | 1.068282611 | 0.000933887 |
| ENSG00000102804 | TSC22D1  | 1.068351685 | 2.03E-05    |
| ENSG00000106246 | PTCD1    | 1.068356539 | 0.001458849 |
| ENSG00000122550 | KLHL7    | 1.068375157 | 0.004667791 |
| ENSG00000136098 | NEK3     | 1.068386779 | 0.032239852 |
| ENSG00000156831 | NSMCE2   | 1.06839871  | 0.001216026 |
| ENSG00000100393 | EP300    | 1.068402487 | 0.000474614 |
| ENSG00000162729 | IGSF8    | 1.06841283  | 3.04E-05    |
| ENSG00000103254 | FAM173A  | 1.068431178 | 0.038865002 |
| ENSG00000116685 | KIAA2013 | 1.068432845 | 1.84E-09    |
| ENSG00000012048 | BRCA1    | 1.06844423  | 0.001254147 |
| ENSG00000123243 | ITIH5    | 1.068456498 | 0.022039742 |
| ENSG00000118058 | KMT2A    | 1.068458981 | 5.87E-05    |
| ENSG00000174953 | DHX36    | 1.068460327 | 7.24E-05    |
| ENSG00000159882 | ZNF230   | 1.06848229  | 0.02649719  |
| ENSG00000133302 | ANKRD32  | 1.068501851 | 0.002263043 |
| ENSG00000189409 | MMP23B   | 1.068527551 | 0.001757277 |

|                 |           |             |             |
|-----------------|-----------|-------------|-------------|
| ENSG00000148842 | CNNM2     | 1.06855139  | 1.58E-06    |
| ENSG00000084090 | STARD7    | 1.068585536 | 0.001963319 |
| ENSG00000125826 | RBCK1     | 1.068679152 | 0.00147593  |
| ENSG00000102738 | MRPS31    | 1.068690608 | 8.84E-05    |
| ENSG00000121481 | RNF2      | 1.068740432 | 0.034331306 |
| ENSG00000173705 | SUSD5     | 1.068754254 | 0.021339759 |
| ENSG00000172315 | TP53RK    | 1.06877849  | 0.000567405 |
| ENSG00000204922 | C11orf83  | 1.068781874 | 0.000645294 |
| ENSG00000187514 | PTMA      | 1.068795129 | 0.006410168 |
| ENSG00000089177 | KIF16B    | 1.06879772  | 0.01212659  |
| ENSG00000230055 | CISD3     | 1.068805061 | 0.004584556 |
| ENSG00000103066 | PLA2G15   | 1.068828712 | 0.007258928 |
| ENSG00000215114 | UBXN2B    | 1.068847904 | 0.000403434 |
| ENSG00000130816 | DNMT1     | 1.06885007  | 0.000312923 |
| ENSG00000116906 | GNPAT     | 1.068862347 | 1.79E-05    |
| ENSG00000105722 | ERF       | 1.068908823 | 0.004491074 |
| ENSG00000184232 | OAF       | 1.068912316 | 0.001802678 |
| ENSG00000121644 | DESI2     | 1.068925419 | 0.000273615 |
| ENSG00000117266 | CDK18     | 1.068928827 | 0.001535598 |
| ENSG00000101441 | CST4      | 1.068946963 | 0.008649668 |
| ENSG00000184164 | CRELD2    | 1.06899959  | 0.003576998 |
| ENSG00000183808 | RBM12B    | 1.06905643  | 0.000218243 |
| ENSG00000105711 | SCN1B     | 1.069059873 | 0.003968217 |
| ENSG00000165609 | NUDT5     | 1.069115989 | 3.45E-06    |
| ENSG00000167985 | SDHAF2    | 1.069126258 | 0.011338518 |
| ENSG00000136816 | TOR1B     | 1.06917204  | 0.022883455 |
| ENSG00000115970 | THADA     | 1.069173873 | 0.003471582 |
| ENSG00000176903 | PNMA1     | 1.069216154 | 0.008700814 |
| ENSG00000004139 | SARM1     | 1.069223066 | 0.00341569  |
| ENSG00000132792 | CTNBL1    | 1.069225187 | 0.042649067 |
| ENSG00000105849 | TWISTNB   | 1.069228118 | 2.85E-05    |
| ENSG00000100994 | PYGB      | 1.069244535 | 0.010880536 |
| ENSG00000137513 | NARS2     | 1.069245428 | 0.005528818 |
| ENSG00000109118 | PHF12     | 1.069318104 | 7.64E-06    |
| ENSG00000128408 | RIBC2     | 1.069364554 | 0.021261846 |
| ENSG00000113494 | PRLR      | 1.069365057 | 0.004627675 |
| ENSG00000138835 | RGS3      | 1.069383025 | 0.008097338 |
| ENSG00000143977 | SNRPG     | 1.069461023 | 0.000430481 |
| ENSG00000188130 | MAPK12    | 1.06946468  | 0.001971614 |
| ENSG00000160695 | VPS11     | 1.06947279  | 0.000124596 |
| ENSG00000110060 | PUS3      | 1.069473489 | 0.007824837 |
| ENSG00000163964 | PIGX      | 1.069490839 | 0.013931109 |
| ENSG00000125872 | LRRN4     | 1.069561249 | 0.000587186 |
| ENSG00000110002 | VWA5A     | 1.069588157 | 0.001805982 |
| ENSG00000128284 | APOL3     | 1.069630678 | 0.012983173 |
| ENSG00000135521 | LTV1      | 1.069648888 | 0.009166212 |
| ENSG00000198826 | ARHGAP11A | 1.069663553 | 0.010997578 |

|                 |          |             |             |
|-----------------|----------|-------------|-------------|
| ENSG00000114395 | CYB561D2 | 1.069663876 | 0.00020894  |
| ENSG00000130935 | NOL11    | 1.069668332 | 0.018229809 |
| ENSG00000073111 | MCM2     | 1.069696705 | 0.034260941 |
| ENSG00000196715 | VKORC1L1 | 1.069728145 | 1.51E-05    |
| ENSG00000250565 | ATP6V1E2 | 1.069734438 | 0.0018661   |
| ENSG00000102531 | FNDC3A   | 1.069747491 | 1.32E-05    |
| ENSG00000055732 | MCOLN3   | 1.069752651 | 0.021760749 |
| ENSG00000163909 | HEYL     | 1.06975951  | 6.50E-05    |
| ENSG00000100031 | GGT1     | 1.069759879 | 0.003941356 |
| ENSG00000163156 | SCNM1    | 1.069773393 | 0.000850766 |
| ENSG00000153933 | DGKE     | 1.069776988 | 6.02E-10    |
| ENSG00000158792 | SPATA2L  | 1.069789532 | 0.015588601 |
| ENSG00000076928 | ARHGEF1  | 1.069800154 | 0.000159091 |
| ENSG00000162676 | GF11     | 1.069830642 | 0.018523016 |
| ENSG00000109854 | HTATIP2  | 1.069862784 | 0.012480541 |
| ENSG00000197375 | SLC22A5  | 1.06988105  | 0.023870773 |
| ENSG00000095209 | TMEM38B  | 1.069885417 | 0.030089014 |
| ENSG00000197183 | C2orf112 | 1.069926427 | 7.36E-08    |
| ENSG00000078269 | SYNJ2    | 1.069945231 | 1.61E-08    |
| ENSG00000198056 | PRIM1    | 1.069958782 | 0.027274972 |
| ENSG00000116668 | SWT1     | 1.069961652 | 9.85E-06    |
| ENSG00000172578 | KLHL6    | 1.06999786  | 0.023015903 |
| ENSG00000197982 | C1orf122 | 1.070034537 | 7.32E-05    |
| ENSG00000136270 | TBRG4    | 1.070038707 | 0.013448583 |
| ENSG00000137343 | ATAT1    | 1.070041687 | 0.000307834 |
| ENSG00000126561 | STAT5A   | 1.070048269 | 0.002451799 |
| ENSG00000135632 | SMYD5    | 1.070065806 | 4.25E-06    |
| ENSG00000162585 | C1orf86  | 1.070068412 | 4.26E-06    |
| ENSG00000189292 | FAM150B  | 1.07012898  | 0.021621357 |
| ENSG00000170476 | MZB1     | 1.070168119 | 0.036460383 |
| ENSG00000102241 | HTATSF1  | 1.070208816 | 0.000843163 |
| ENSG00000123545 | NDUFAF4  | 1.070210702 | 0.017114117 |
| ENSG00000152464 | RPP38    | 1.070230888 | 0.000214147 |
| ENSG00000139405 | RITA1    | 1.070233778 | 0.006246582 |
| ENSG00000100263 | RHBDD3   | 1.070240691 | 0.00069012  |
| ENSG00000185344 | ATP6V0A2 | 1.070251926 | 4.56E-05    |
| ENSG00000086475 | SEPHS1   | 1.070274315 | 0.000184008 |
| ENSG00000145730 | PAM      | 1.070280988 | 0.000256452 |
| ENSG00000228716 | DHFR     | 1.070287011 | 0.002634109 |
| ENSG00000147687 | TATDN1   | 1.070302876 | 0.029474884 |
| ENSG00000078808 | SDF4     | 1.070327262 | 0.000587922 |
| ENSG00000092201 | SUPT16H  | 1.070340868 | 0.005845351 |
| ENSG00000148606 | POLR3A   | 1.070392422 | 0.000714622 |
| ENSG00000083099 | LYRM2    | 1.070403295 | 9.82E-05    |
| ENSG00000051128 | HOMER3   | 1.070462717 | 0.000265529 |
| ENSG00000133422 | MORC2    | 1.070503311 | 0.013721608 |
| ENSG00000161914 | ZNF653   | 1.070525977 | 0.001514589 |

|                 |          |             |             |
|-----------------|----------|-------------|-------------|
| ENSG00000143333 | RGS16    | 1.070546432 | 0.000915321 |
| ENSG00000167747 | C19orf48 | 1.070554958 | 0.000261753 |
| ENSG00000012504 | NR1H4    | 1.070569974 | 0.007220998 |
| ENSG00000183137 | CEP57L1  | 1.070572611 | 5.56E-05    |
| ENSG00000152503 | TRIM36   | 1.070578252 | 0.035225892 |
| ENSG00000161381 | PLXDC1   | 1.070585163 | 0.014625818 |
| ENSG00000111666 | CHPT1    | 1.070600953 | 0.015848265 |
| ENSG00000143850 | PLEKHA6  | 1.070608533 | 0.032988853 |
| ENSG00000175048 | ZDHHC14  | 1.070643126 | 0.000547728 |
| ENSG00000102897 | LYRM1    | 1.070655773 | 0.0003597   |
| ENSG00000110619 | CARS     | 1.070681526 | 0.004813695 |
| ENSG00000131495 | NDUFA2   | 1.070695029 | 3.22E-05    |
| ENSG00000151413 | NUBPL    | 1.070725099 | 0.019550078 |
| ENSG00000241258 | CRCP     | 1.070739903 | 2.15E-06    |
| ENSG00000100084 | HIRA     | 1.070804036 | 0.005323617 |
| ENSG00000167904 | TMEM68   | 1.070835736 | 0.005138907 |
| ENSG00000196793 | ZNF239   | 1.070850342 | 0.049529548 |
| ENSG00000101311 | FERMT1   | 1.070944866 | 0.004337334 |
| ENSG00000167088 | SNRPD1   | 1.070971244 | 0.003315178 |
| ENSG00000111371 | SLC38A1  | 1.07101237  | 0.000840425 |
| ENSG00000137133 | HINT2    | 1.071120482 | 0.000274274 |
| ENSG00000196636 | ACN9     | 1.071129329 | 0.022315446 |
| ENSG00000196911 | KPNA5    | 1.071146608 | 0.003776987 |
| ENSG00000141012 | GALNS    | 1.07118044  | 0.010300373 |
| ENSG00000056736 | IL17RB   | 1.07118958  | 0.021294921 |
| ENSG00000106236 | NPTX2    | 1.071203543 | 0.014849984 |
| ENSG00000169241 | SLC50A1  | 1.071207386 | 0.027106323 |
| ENSG00000105258 | POLR2I   | 1.071233783 | 3.93E-05    |
| ENSG00000120688 | WBP4     | 1.071267669 | 0.002318126 |
| ENSG00000135829 | DHX9     | 1.071333441 | 0.00019958  |
| ENSG00000177683 | THAP5    | 1.071424797 | 0.000244866 |
| ENSG00000262246 | CORO7    | 1.071436459 | 0.038692458 |
| ENSG00000054282 | SDCCAG8  | 1.071456349 | 0.000665257 |
| ENSG00000076351 | SLC46A1  | 1.071463857 | 0.000706412 |
| ENSG00000214078 | CPNE1    | 1.071482029 | 0.001673511 |
| ENSG00000147162 | OGT      | 1.07153387  | 0.039908366 |
| ENSG00000174358 | SLC6A19  | 1.071560961 | 0.001657513 |
| ENSG00000130811 | EIF3G    | 1.071561525 | 1.24E-07    |
| ENSG00000204116 | CHIC1    | 1.071563777 | 0.006156854 |
| ENSG00000065548 | ZC3H15   | 1.07156462  | 2.88E-06    |
| ENSG00000159714 | ZDHHC1   | 1.071574375 | 8.26E-05    |
| ENSG00000182952 | HMGNA4   | 1.0716153   | 6.28E-05    |
| ENSG00000198786 | MT-ND5   | 1.071646269 | 0.026713599 |
| ENSG00000154134 | ROBO3    | 1.071666559 | 0.006857351 |
| ENSG00000204472 | AIF1     | 1.071686419 | 0.004560702 |
| ENSG00000163795 | ZNF513   | 1.071688852 | 0.001302928 |
| ENSG00000123992 | DNPEP    | 1.071715816 | 0.005616606 |

|                 |          |             |             |
|-----------------|----------|-------------|-------------|
| ENSG00000160908 | ZNF394   | 1.071734654 | 0.00368799  |
| ENSG00000170689 | HOXB9    | 1.071770826 | 2.25E-05    |
| ENSG00000159063 | ALG8     | 1.071774071 | 0.000212807 |
| ENSG00000105327 | BBC3     | 1.0718206   | 0.000938794 |
| ENSG00000186198 | SLC51B   | 1.071858195 | 0.04266888  |
| ENSG00000007908 | SELE     | 1.071869758 | 0.004192384 |
| ENSG00000170791 | CHCHD7   | 1.071905125 | 0.000155526 |
| ENSG00000100564 | PIGH     | 1.071914535 | 3.81E-05    |
| ENSG00000182307 | C8orf33  | 1.071921913 | 0.002130372 |
| ENSG00000138398 | PPIG     | 1.071939422 | 3.05E-06    |
| ENSG00000169783 | LINGO1   | 1.071954323 | 0.000203636 |
| ENSG00000107651 | SEC23IP  | 1.071961531 | 0.000233214 |
| ENSG00000131153 | GINS2    | 1.071970463 | 0.001709393 |
| ENSG00000177189 | RPS6KA3  | 1.071974063 | 0.00090674  |
| ENSG00000116783 | TNNI3K   | 1.071993147 | 0.000998375 |
| ENSG00000105483 | CARD8    | 1.071994768 | 0.00019903  |
| ENSG00000180879 | SSR4     | 1.071995545 | 3.52E-06    |
| ENSG00000153879 | CEBPG    | 1.072013198 | 7.18E-05    |
| ENSG00000040199 | PHLPP2   | 1.072025089 | 2.49E-05    |
| ENSG00000136628 | EPRS     | 1.072039525 | 3.86E-05    |
| ENSG00000211450 | C11orf31 | 1.072088954 | 5.22E-06    |
| ENSG00000181396 | OGFOD3   | 1.072094807 | 0.001387487 |
| ENSG00000143368 | SF3B4    | 1.072124801 | 0.001474488 |
| ENSG00000185565 | LSAMP    | 1.072129486 | 0.014307864 |
| ENSG00000135314 | KHDC1    | 1.072162037 | 0.012581663 |
| ENSG00000115520 | COQ10B   | 1.072163953 | 3.73E-06    |
| ENSG00000151376 | ME3      | 1.07216627  | 0.02604118  |
| ENSG00000122482 | ZNF644   | 1.072196396 | 0.000140667 |
| ENSG00000133318 | RTN3     | 1.072203699 | 0.018123422 |
| ENSG00000172465 | TCEAL1   | 1.072220048 | 0.026922577 |
| ENSG00000172955 | ADH6     | 1.072258441 | 0.041045905 |
| ENSG00000174844 | DNAH12   | 1.072281484 | 0.007272416 |
| ENSG00000169679 | BUB1     | 1.072284535 | 3.80E-06    |
| ENSG00000204899 | MZT1     | 1.072394054 | 0.009567094 |
| ENSG00000091129 | NRCAM    | 1.07239696  | 0.002990501 |
| ENSG00000102393 | GLA      | 1.07240025  | 0.007694334 |
| ENSG00000177311 | ZBTB38   | 1.07240943  | 0.000198345 |
| ENSG00000134480 | CCNH     | 1.072450143 | 0.000255494 |
| ENSG00000106263 | EIF3B    | 1.072480198 | 0.005398571 |
| ENSG00000129675 | ARHGEF6  | 1.072492076 | 0.046430495 |
| ENSG00000183513 | COA5     | 1.07250941  | 2.52E-08    |
| ENSG00000163714 | U2SURP   | 1.072519988 | 0.045263675 |
| ENSG00000204859 | ZBTB48   | 1.07252489  | 4.97E-05    |
| ENSG00000135976 | ANKRD36  | 1.072525253 | 0.029768424 |
| ENSG00000165704 | HPRT1    | 1.072587989 | 0.024937089 |
| ENSG00000165879 | FRAT1    | 1.072616659 | 0.012100578 |
| ENSG00000110172 | CHORDC1  | 1.072635434 | 0.035326635 |

|                 |          |             |             |
|-----------------|----------|-------------|-------------|
| ENSG00000234769 | WASH4P   | 1.072698158 | 0.000761163 |
| ENSG00000134291 | TMEM106C | 1.072701157 | 0.036000042 |
| ENSG00000029993 | HMGB3    | 1.072704584 | 0.002429787 |
| ENSG00000116922 | C1orf109 | 1.072708934 | 0.004004761 |
| ENSG00000148450 | MSRB2    | 1.072727668 | 0.000184896 |
| ENSG00000127528 | KLF2     | 1.072742064 | 0.015131402 |
| ENSG00000089685 | BIRC5    | 1.072757155 | 0.018359231 |
| ENSG00000150990 | DHX37    | 1.072787849 | 3.64E-05    |
| ENSG00000101986 | ABCD1    | 1.072800091 | 5.38E-06    |
| ENSG00000175182 | FAM131A  | 1.072850529 | 6.32E-06    |
| ENSG00000157557 | ETS2     | 1.07285629  | 0.014711637 |
| ENSG00000148019 | CEP78    | 1.07288294  | 0.003557434 |
| ENSG00000117877 | CD3EAP   | 1.072890954 | 0.001304093 |
| ENSG00000164463 | CREBRF   | 1.072899914 | 0.004094711 |
| ENSG00000176953 | NFATC2IP | 1.07290134  | 1.85E-05    |
| ENSG00000161021 | MAML1    | 1.072959145 | 4.64E-08    |
| ENSG00000106400 | ZNHIT1   | 1.072971609 | 0.002094233 |
| ENSG00000135625 | EGR4     | 1.073004831 | 0.045706587 |
| ENSG00000143303 | RRNAD1   | 1.073005928 | 6.08E-05    |
| ENSG00000124116 | WFDC3    | 1.073008945 | 0.030791078 |
| ENSG00000135801 | TAF5L    | 1.073061526 | 2.74E-06    |
| ENSG00000178821 | TMEM52   | 1.07308833  | 0.011025264 |
| ENSG00000167476 | JSRP1    | 1.073109582 | 0.012098694 |
| ENSG00000110888 | CAPRIN2  | 1.073128363 | 0.037342858 |
| ENSG00000150456 | N6AMT2   | 1.073137322 | 0.001994628 |
| ENSG00000142945 | KIF2C    | 1.073146813 | 0.012826172 |
| ENSG00000198467 | TPM2     | 1.073156245 | 5.49E-06    |
| ENSG00000196812 | ZSCAN16  | 1.073189029 | 0.013257521 |
| ENSG00000214113 | LYRM4    | 1.073213537 | 0.001132712 |
| ENSG00000117984 | CTSD     | 1.073240899 | 0.003506222 |
| ENSG00000143799 | PARP1    | 1.073310817 | 0.006036374 |
| ENSG00000115524 | SF3B1    | 1.073317448 | 0.028264766 |
| ENSG00000064995 | TAF11    | 1.073338687 | 0.018856143 |
| ENSG00000135094 | SDS      | 1.073356949 | 0.006591357 |
| ENSG00000147133 | TAF1     | 1.073423109 | 0.000101723 |
| ENSG00000111912 | NCOA7    | 1.073484792 | 5.46E-05    |
| ENSG00000170266 | GLB1     | 1.073501446 | 0.01562263  |
| ENSG00000089682 | RBM41    | 1.073505156 | 0.033251082 |
| ENSG00000198824 | CHAMP1   | 1.073557368 | 0.000716167 |
| ENSG00000139567 | ACVRL1   | 1.073560663 | 0.003101551 |
| ENSG00000114767 | RRP9     | 1.073563014 | 6.04E-05    |
| ENSG00000055118 | KCNH2    | 1.073610711 | 4.26E-05    |
| ENSG00000138092 | CENPO    | 1.073647216 | 0.002900736 |
| ENSG00000124406 | ATP8A1   | 1.073651012 | 0.005399851 |
| ENSG00000110090 | CPT1A    | 1.073690215 | 0.002371769 |
| ENSG00000157212 | PAXIP1   | 1.073703468 | 0.00442044  |
| ENSG00000174891 | RSRC1    | 1.073754072 | 6.18E-06    |

|                 |          |             |             |
|-----------------|----------|-------------|-------------|
| ENSG00000141452 | C18orf8  | 1.073755159 | 0.01499796  |
| ENSG00000149262 | INTS4    | 1.073757498 | 0.003944922 |
| ENSG00000173511 | VEGFB    | 1.073773097 | 0.00111917  |
| ENSG00000127870 | RNF6     | 1.073774318 | 0.000327457 |
| ENSG00000112029 | FBXO5    | 1.073799474 | 0.012094793 |
| ENSG00000167384 | ZNF180   | 1.073804984 | 0.02672818  |
| ENSG00000124226 | RNF114   | 1.073843859 | 0.022396168 |
| ENSG00000235750 | KIAA0040 | 1.073906328 | 0.00286148  |
| ENSG00000244291 | C7orf13  | 1.073928484 | 0.005938024 |
| ENSG00000090097 | PCBP4    | 1.073949992 | 0.000482209 |
| ENSG00000213930 | GALT     | 1.073973154 | 0.000543605 |
| ENSG00000144711 | IQSEC1   | 1.073981341 | 0.000330757 |
| ENSG00000186532 | SMYD4    | 1.074073145 | 7.02E-05    |
| ENSG00000119523 | ALG2     | 1.074084105 | 3.13E-07    |
| ENSG00000176894 | PXMP2    | 1.074134269 | 0.006392354 |
| ENSG00000135749 | PCNXL2   | 1.074138388 | 0.000475956 |
| ENSG00000100345 | MYH9     | 1.074139773 | 7.34E-06    |
| ENSG00000183066 | WBP2NL   | 1.0741845   | 0.017460462 |
| ENSG00000165388 | ZNF488   | 1.074190273 | 0.000693749 |
| ENSG00000102096 | PIM2     | 1.074242798 | 0.035425803 |
| ENSG00000243147 | MRPL33   | 1.074291248 | 2.57E-07    |
| ENSG00000141456 | PELP1    | 1.074298726 | 2.21E-05    |
| ENSG00000105732 | ZNF574   | 1.07433337  | 9.78E-06    |
| ENSG00000182504 | CEP97    | 1.074366259 | 0.002658965 |
| ENSG00000198585 | NUDT16   | 1.074396224 | 1.04E-05    |
| ENSG00000139579 | NABP2    | 1.074400464 | 0.022818321 |
| ENSG00000198700 | IPO9     | 1.074430488 | 0.000146507 |
| ENSG00000106348 | IMPDH1   | 1.074444561 | 0.001514961 |
| ENSG00000196417 | ZNF765   | 1.074471705 | 2.26E-07    |
| ENSG00000122376 | FAM35A   | 1.074481547 | 0.000264015 |
| ENSG00000077044 | DGKD     | 1.074504776 | 0.001512359 |
| ENSG00000144852 | NR1I2    | 1.074508286 | 0.046983297 |
| ENSG00000153317 | ASAP1    | 1.074515764 | 0.000562247 |
| ENSG00000102081 | FMR1     | 1.074547054 | 0.003289472 |
| ENSG00000119681 | LTBP2    | 1.07457481  | 0.007609918 |
| ENSG00000133195 | SLC39A11 | 1.07458227  | 3.09E-05    |
| ENSG00000185339 | TCN2     | 1.074618295 | 3.74E-05    |
| ENSG00000066697 | MSANTD3  | 1.074618299 | 0.000841474 |
| ENSG00000116560 | SFPQ     | 1.074620308 | 0.011992037 |
| ENSG00000117385 | LEPRE1   | 1.074639427 | 0.010865047 |
| ENSG00000095380 | NANS     | 1.07467209  | 0.033701361 |
| ENSG00000172216 | CEBPB    | 1.074720657 | 0.018367535 |
| ENSG00000114904 | NEK4     | 1.074724157 | 0.002375614 |
| ENSG00000168137 | SETD5    | 1.074750658 | 0.026801325 |
| ENSG00000112280 | COL9A1   | 1.074819299 | 7.55E-05    |
| ENSG00000166337 | TAF10    | 1.074859388 | 1.20E-05    |
| ENSG00000126522 | ASL      | 1.074920433 | 0.048281508 |

|                 |            |             |             |
|-----------------|------------|-------------|-------------|
| ENSG00000133119 | RFC3       | 1.074936674 | 0.003939616 |
| ENSG00000120693 | SMAD9      | 1.074984425 | 0.007081198 |
| ENSG00000218891 | ZNF579     | 1.074998939 | 6.15E-05    |
| ENSG00000213341 | CHUK       | 1.074999431 | 0.001648382 |
| ENSG00000023902 | PLEKHO1    | 1.075004993 | 0.017248645 |
| ENSG00000124459 | ZNF45      | 1.075015448 | 0.000350518 |
| ENSG00000112759 | SLC29A1    | 1.075020651 | 0.004745181 |
| ENSG00000110925 | CSRNP2     | 1.075079295 | 9.55E-05    |
| ENSG00000168763 | CNNM3      | 1.075093166 | 0.018564794 |
| ENSG00000221990 | C5orf55    | 1.075114006 | 0.032067013 |
| ENSG00000171865 | RNASEH1    | 1.075121735 | 4.01E-05    |
| ENSG00000068912 | ERLEC1     | 1.075131566 | 9.44E-06    |
| ENSG00000165626 | BEND7      | 1.07513569  | 0.002952524 |
| ENSG00000164466 | SFXN1      | 1.075137668 | 0.009238053 |
| ENSG00000184014 | DENND5A    | 1.075151743 | 0.033483374 |
| ENSG00000143815 | LBR        | 1.075187955 | 4.63E-05    |
| ENSG00000151414 | NEK7       | 1.075214533 | 0.002438288 |
| ENSG00000124126 | PREX1      | 1.075271287 | 0.012291515 |
| ENSG00000166831 | RBPMS2     | 1.075280163 | 0.049589751 |
| ENSG00000164972 | C9orf24    | 1.075332776 | 0.002694636 |
| ENSG00000026950 | BTN3A1     | 1.075338404 | 0.010444211 |
| ENSG00000151790 | TDO2       | 1.075385505 | 0.0235643   |
| ENSG00000163428 | LRRC58     | 1.075420378 | 5.00E-06    |
| ENSG00000168903 | BTNL3      | 1.0754327   | 0.001479276 |
| ENSG00000204301 | NOTCH4     | 1.075442031 | 0.005785637 |
| ENSG00000172239 | PAIP1      | 1.075450581 | 0.002529438 |
| ENSG00000120498 | TEX11      | 1.075466355 | 0.008740925 |
| ENSG00000114455 | HHLA2      | 1.075474464 | 0.000284981 |
| ENSG00000161653 | NAGS       | 1.075476262 | 0.003536654 |
| ENSG00000146909 | NOM1       | 1.075481422 | 0.003563187 |
| ENSG00000121577 | POPDC2     | 1.075515614 | 0.000837202 |
| ENSG00000163170 | BOLA3      | 1.075541104 | 1.99E-05    |
| ENSG00000157456 | CCNB2      | 1.0755597   | 0.015116454 |
| ENSG00000142065 | ZFP14      | 1.075618562 | 0.01463462  |
| ENSG00000167705 | RILP       | 1.075620942 | 6.91E-05    |
| ENSG00000174606 | ANGEL2     | 1.075636159 | 0.001517699 |
| ENSG00000197892 | KIF13B     | 1.075649058 | 0.001790949 |
| ENSG00000148834 | GSTO1      | 1.075649994 | 0.006417933 |
| ENSG00000114503 | NCBP2      | 1.075707202 | 0.030645508 |
| ENSG00000180992 | MRPL14     | 1.075711785 | 1.23E-06    |
| ENSG00000143036 | SLC44A3    | 1.075716879 | 0.004124207 |
| ENSG00000254531 | AP001816.1 | 1.075768315 | 0.002125244 |
| ENSG00000134597 | RBMX2      | 1.075782905 | 0.043194052 |
| ENSG00000204713 | TRIM27     | 1.075804375 | 0.001721833 |
| ENSG00000008853 | RHOBTB2    | 1.07580846  | 7.38E-05    |
| ENSG00000126756 | UXT        | 1.075824126 | 7.48E-06    |
| ENSG00000097021 | ACOT7      | 1.075849528 | 0.000236374 |

|                 |            |             |             |
|-----------------|------------|-------------|-------------|
| ENSG00000182871 | COL18A1    | 1.075887942 | 0.019095279 |
| ENSG00000143153 | ATP1B1     | 1.075933121 | 0.007084442 |
| ENSG00000092421 | SEMA6A     | 1.075944818 | 0.043498753 |
| ENSG00000005189 | AC004381.6 | 1.075945392 | 0.008613079 |
| ENSG00000180953 | ST20       | 1.076000983 | 0.015615186 |
| ENSG00000121104 | FAM117A    | 1.076006956 | 0.033451145 |
| ENSG00000164221 | CCDC112    | 1.07601467  | 0.001384157 |
| ENSG00000073417 | PDE8A      | 1.07604007  | 3.50E-05    |
| ENSG00000111335 | OAS2       | 1.076051901 | 0.047709615 |
| ENSG00000176887 | SOX11      | 1.076113238 | 0.000777054 |
| ENSG00000094975 | SUCO       | 1.076123245 | 0.038856955 |
| ENSG00000110031 | LPXN       | 1.076124733 | 0.019815614 |
| ENSG00000196998 | WDR45      | 1.076127483 | 0.00167631  |
| ENSG00000182963 | GJC1       | 1.076130688 | 0.002540767 |
| ENSG00000106591 | MRPL32     | 1.076136976 | 2.16E-09    |
| ENSG00000142910 | TINAGL1    | 1.076150906 | 0.000298384 |
| ENSG00000198113 | TOR4A      | 1.076155558 | 0.000301572 |
| ENSG00000154358 | OBSCN      | 1.076162661 | 2.34E-05    |
| ENSG00000126453 | BCL2L12    | 1.076201497 | 0.000146556 |
| ENSG00000139496 | NUPL1      | 1.076216569 | 0.021063896 |
| ENSG00000164626 | KCNK5      | 1.07623291  | 0.029487022 |
| ENSG00000179222 | MAGED1     | 1.076235638 | 0.011267017 |
| ENSG00000261787 | TCF24      | 1.076248976 | 3.13E-06    |
| ENSG00000103363 | TCEB2      | 1.076316964 | 6.98E-07    |
| ENSG00000006282 | SPATA20    | 1.076338147 | 0.029479369 |
| ENSG00000171320 | ESCO2      | 1.076405527 | 0.00149786  |
| ENSG00000130775 | THEMIS2    | 1.076422164 | 0.036430196 |
| ENSG00000168944 | CEP120     | 1.076463655 | 0.000125419 |
| ENSG00000164761 | TNFRSF11B  | 1.076485665 | 0.013153167 |
| ENSG00000183665 | TRMT12     | 1.076505788 | 0.015944003 |
| ENSG00000204217 | BMPR2      | 1.07650818  | 0.004494953 |
| ENSG00000180035 | ZNF48      | 1.07651917  | 1.65E-06    |
| ENSG00000133315 | MACROD1    | 1.076524114 | 0.012489655 |
| ENSG00000168242 | HIST1H2BI  | 1.076567397 | 0.024631914 |
| ENSG00000175279 | APITD1     | 1.076573101 | 0.002303025 |
| ENSG00000198743 | SLC5A3     | 1.076584904 | 0.000785003 |
| ENSG00000108384 | RAD51C     | 1.076609202 | 0.000774637 |
| ENSG00000115687 | PASK       | 1.076648155 | 0.006153079 |
| ENSG00000135482 | ZC3H10     | 1.076715212 | 0.000974059 |
| ENSG00000132635 | PCED1A     | 1.07671642  | 0.000594373 |
| ENSG00000140694 | PARN       | 1.076718374 | 0.000729021 |
| ENSG00000170584 | NUDCD2     | 1.076728038 | 0.020524202 |
| ENSG00000258366 | RTEL1      | 1.076737607 | 4.04E-07    |
| ENSG00000087086 | FTL        | 1.07674906  | 0.000451693 |
| ENSG00000168887 | C2orf68    | 1.076755692 | 0.004002452 |
| ENSG00000169398 | PTK2       | 1.076766205 | 0.042795994 |
| ENSG00000171840 | NINJ2      | 1.076772623 | 0.017873346 |

|                 |          |             |             |
|-----------------|----------|-------------|-------------|
| ENSG00000144182 | LIPT1    | 1.076810787 | 0.001557323 |
| ENSG00000063241 | ISOC2    | 1.076817245 | 0.000702905 |
| ENSG00000167721 | TSR1     | 1.076829491 | 0.034063977 |
| ENSG00000143376 | SNX27    | 1.076843329 | 0.000735218 |
| ENSG00000174943 | KCTD13   | 1.076843705 | 0.000556193 |
| ENSG00000128340 | RAC2     | 1.076915225 | 0.014841027 |
| ENSG00000243279 | PRAF2    | 1.07691628  | 0.01781498  |
| ENSG00000132623 | ANKEF1   | 1.076930675 | 0.01618127  |
| ENSG00000103005 | USB1     | 1.076969924 | 5.38E-07    |
| ENSG00000065328 | MCM10    | 1.077003009 | 0.023817188 |
| ENSG00000182197 | EXT1     | 1.077018597 | 0.003528979 |
| ENSG00000204271 | SPIN3    | 1.077128034 | 0.002080921 |
| ENSG00000168918 | INPP5D   | 1.077133373 | 0.001714531 |
| ENSG00000143319 | ISG20L2  | 1.077203035 | 2.77E-06    |
| ENSG00000204060 | FOXO6    | 1.07721588  | 0.005359154 |
| ENSG00000113657 | DPYSL3   | 1.077239037 | 0.029222666 |
| ENSG00000085662 | AKR1B1   | 1.077403731 | 0.022088229 |
| ENSG00000105619 | TFPT     | 1.077422893 | 0.022170675 |
| ENSG00000145020 | AMT      | 1.077460067 | 0.027301315 |
| ENSG00000127946 | HIP1     | 1.077560878 | 0.00038389  |
| ENSG00000087095 | NLK      | 1.077569602 | 0.007312001 |
| ENSG00000114850 | SSR3     | 1.07758987  | 8.34E-05    |
| ENSG00000117859 | OSBPL9   | 1.077598828 | 0.042787536 |
| ENSG00000075234 | TTC38    | 1.077647605 | 0.002932054 |
| ENSG00000138821 | SLC39A8  | 1.077677425 | 7.97E-09    |
| ENSG00000132481 | TRIM47   | 1.077687623 | 0.0003678   |
| ENSG00000070047 | PHRF1    | 1.077740213 | 3.33E-06    |
| ENSG00000204387 | C6orf48  | 1.0777713   | 0.000332789 |
| ENSG00000111783 | RFX4     | 1.077793368 | 0.041803929 |
| ENSG00000145681 | HAPLN1   | 1.077793895 | 0.015099358 |
| ENSG00000122642 | FKBP9    | 1.077828367 | 0.000877161 |
| ENSG00000083312 | TNPO1    | 1.077888421 | 0.025317524 |
| ENSG00000175756 | AURKAIP1 | 1.077910317 | 6.90E-08    |
| ENSG00000087076 | HSD17B14 | 1.07794414  | 3.42E-05    |
| ENSG00000127337 | YEATS4   | 1.077945505 | 0.01210649  |
| ENSG00000178449 | COX14    | 1.077977248 | 3.28E-07    |
| ENSG00000051009 | FAM160A2 | 1.077982749 | 0.001067434 |
| ENSG00000139734 | DIAPH3   | 1.077995013 | 0.017364426 |
| ENSG00000111860 | CEP85L   | 1.078024356 | 0.00127496  |
| ENSG00000135637 | CCDC142  | 1.07803388  | 0.000118929 |
| ENSG00000125995 | ROMO1    | 1.078049007 | 2.25E-05    |
| ENSG00000025293 | PHF20    | 1.078052245 | 2.41E-07    |
| ENSG00000056097 | ZFR      | 1.078052735 | 0.000118917 |
| ENSG00000168661 | ZNF30    | 1.07811093  | 0.044964173 |
| ENSG00000118965 | WDR35    | 1.078112303 | 0.000165806 |
| ENSG00000002822 | MAD1L1   | 1.078174624 | 0.008079488 |
| ENSG00000004468 | CD38     | 1.078206433 | 0.005980773 |

|                 |            |             |             |
|-----------------|------------|-------------|-------------|
| ENSG00000134900 | TPP2       | 1.07821935  | 6.88E-05    |
| ENSG00000144642 | RBMS3      | 1.078219584 | 7.48E-05    |
| ENSG00000206503 | HLA-A      | 1.078224347 | 0.000155413 |
| ENSG00000165185 | KIAA1958   | 1.07822555  | 0.000458261 |
| ENSG00000225697 | SLC26A6    | 1.078248939 | 0.044930627 |
| ENSG00000070214 | SLC44A1    | 1.078285749 | 0.040631676 |
| ENSG00000182500 | ORAI1      | 1.078300903 | 0.005779528 |
| ENSG00000075292 | ZNF638     | 1.078316088 | 0.043938753 |
| ENSG00000123064 | DDX54      | 1.078339386 | 1.30E-07    |
| ENSG00000119333 | WDR34      | 1.078357841 | 0.000260421 |
| ENSG00000144827 | ABHD10     | 1.078360417 | 0.004327607 |
| ENSG00000089022 | MAPKAPK5   | 1.078426925 | 0.04391413  |
| ENSG00000171227 | TMEM37     | 1.078430125 | 0.001822004 |
| ENSG00000174371 | EXO1       | 1.078431308 | 0.001850469 |
| ENSG00000171155 | C1GALT1C1  | 1.078451901 | 0.024450992 |
| ENSG00000151651 | ADAM8      | 1.07845771  | 1.12E-07    |
| ENSG00000130699 | TAF4       | 1.078510327 | 5.19E-06    |
| ENSG00000183655 | KLHL25     | 1.078526209 | 0.000208615 |
| ENSG00000119242 | CCDC92     | 1.078529287 | 0.001416862 |
| ENSG00000116017 | ARID3A     | 1.078541913 | 0.004819544 |
| ENSG00000119650 | IFT43      | 1.078552214 | 3.32E-06    |
| ENSG00000074842 | C19orf10   | 1.078583078 | 0.000711593 |
| ENSG00000130956 | HABP4      | 1.07862448  | 5.95E-07    |
| ENSG00000203778 | FAM229B    | 1.078631059 | 0.002078661 |
| ENSG00000255748 | AC226150.4 | 1.078649855 | 0.003187635 |
| ENSG00000057663 | ATG5       | 1.078709076 | 2.90E-05    |
| ENSG00000138185 | ENTPD1     | 1.078716258 | 0.038332174 |
| ENSG00000064601 | CTSA       | 1.078722164 | 0.005100194 |
| ENSG00000114126 | TFDP2      | 1.078782537 | 0.000789214 |
| ENSG00000149269 | PAK1       | 1.078785946 | 0.013549063 |
| ENSG00000147905 | ZCCHC7     | 1.078792941 | 0.004085874 |
| ENSG00000162604 | TM2D1      | 1.078906612 | 5.10E-06    |
| ENSG00000168958 | MFF        | 1.07891383  | 2.88E-08    |
| ENSG00000182511 | FES        | 1.078944545 | 8.95E-05    |
| ENSG00000179889 | PDXDC1     | 1.078950894 | 0.008307382 |
| ENSG00000189057 | FAM111B    | 1.078957177 | 0.00110798  |
| ENSG00000132963 | POMP       | 1.078967469 | 7.78E-05    |
| ENSG00000149658 | YTHDF1     | 1.079012648 | 0.001487631 |
| ENSG00000196976 | LAGE3      | 1.079026853 | 4.43E-07    |
| ENSG00000178467 | P4HTM      | 1.079036532 | 0.007724943 |
| ENSG00000161800 | RACGAP1    | 1.079084256 | 0.003620671 |
| ENSG00000107874 | CUEDC2     | 1.079105788 | 4.42E-06    |
| ENSG00000111206 | FOXMI      | 1.079119804 | 0.026216862 |
| ENSG00000196092 | PAX5       | 1.079132869 | 0.00078853  |
| ENSG00000178177 | LCORL      | 1.079149912 | 0.001256434 |
| ENSG00000136159 | NUDT15     | 1.079154718 | 0.000677101 |
| ENSG00000183770 | FOXL2      | 1.079168789 | 0.042548377 |

|                 |               |             |             |
|-----------------|---------------|-------------|-------------|
| ENSG00000122390 | NAA60         | 1.079185451 | 7.50E-06    |
| ENSG00000167900 | TK1           | 1.079195161 | 0.026457231 |
| ENSG00000169957 | ZNF768        | 1.07921521  | 0.015775148 |
| ENSG00000140836 | ZFHX3         | 1.079242557 | 7.80E-05    |
| ENSG00000148296 | SURF6         | 1.079247086 | 2.21E-05    |
| ENSG00000102981 | PARD6A        | 1.079251183 | 3.70E-07    |
| ENSG00000071564 | TCF3          | 1.07929721  | 2.18E-08    |
| ENSG00000146828 | SLC12A9       | 1.079338964 | 0.002771809 |
| ENSG00000158604 | TMED4         | 1.079394885 | 4.32E-06    |
| ENSG00000079462 | PAFAH1B3      | 1.079420249 | 0.000184607 |
| ENSG00000036549 | ZZZ3          | 1.079458939 | 3.69E-05    |
| ENSG00000100368 | CSF2RB        | 1.079466522 | 0.04706242  |
| ENSG00000228300 | C19orf24      | 1.079490035 | 8.31E-08    |
| ENSG00000116985 | BMP8B         | 1.079513929 | 1.01E-07    |
| ENSG00000130517 | PGPEP1        | 1.07953365  | 2.91E-05    |
| ENSG00000151067 | CACNA1C       | 1.079546244 | 0.000838714 |
| ENSG00000120533 | ENY2          | 1.079554409 | 0.021621952 |
| ENSG00000164056 | SPRY1         | 1.079587869 | 7.03E-06    |
| ENSG00000152443 | ZNF776        | 1.079593964 | 0.000168586 |
| ENSG00000123485 | HJURP         | 1.07959598  | 0.028664074 |
| ENSG00000108773 | KAT2A         | 1.079606008 | 4.43E-05    |
| ENSG00000137103 | TMEM8B        | 1.07960744  | 0.00124235  |
| ENSG00000188295 | ZNF669        | 1.079608673 | 0.001195822 |
| ENSG00000065809 | FAM107B       | 1.079628184 | 0.024037672 |
| ENSG00000149090 | PAMR1         | 1.079635915 | 0.017175174 |
| ENSG00000160688 | FLAD1         | 1.07966916  | 2.16E-05    |
| ENSG00000169562 | GJB1          | 1.079714555 | 0.037131406 |
| ENSG00000198715 | C1orf85       | 1.079822117 | 0.003801111 |
| ENSG00000142186 | SCYL1         | 1.079841913 | 2.07E-10    |
| ENSG00000174197 | MGA           | 1.079853345 | 0.000818263 |
| ENSG00000187288 | CIDEC         | 1.079915582 | 0.006012374 |
| ENSG00000115760 | BIRC6         | 1.079938234 | 2.63E-07    |
| ENSG00000008300 | CELSR3        | 1.07999384  | 0.044156206 |
| ENSG00000169592 | INO80E        | 1.079997827 | 0.008383995 |
| ENSG00000169519 | METTL15       | 1.080009138 | 0.005055394 |
| ENSG00000116127 | ALMS1         | 1.080011154 | 0.004642854 |
| ENSG00000133657 | ATP13A3       | 1.080072703 | 0.001036796 |
| ENSG00000266208 | CTD-2267D19.3 | 1.080095917 | 3.29E-05    |
| ENSG00000119865 | CNRIP1        | 1.08010331  | 0.033006748 |
| ENSG00000173545 | ZNF622        | 1.080193522 | 5.40E-05    |
| ENSG00000188313 | PLSCR1        | 1.080217361 | 0.01065401  |
| ENSG00000198865 | CCDC152       | 1.08022484  | 0.003021059 |
| ENSG00000154928 | EPHB1         | 1.080229583 | 0.005431554 |
| ENSG00000137124 | ALDH1B1       | 1.080252181 | 0.000804561 |
| ENSG00000205791 | LOH12CR2      | 1.080255519 | 3.47E-05    |
| ENSG00000183145 | RIPPLY3       | 1.080261758 | 0.049100812 |
| ENSG00000161036 | LRWD1         | 1.080337827 | 2.70E-06    |

|                 |            |             |             |
|-----------------|------------|-------------|-------------|
| ENSG00000108771 | DHX58      | 1.080344914 | 0.000863092 |
| ENSG00000180008 | SOCS4      | 1.080420092 | 0.00023123  |
| ENSG00000108465 | CDK5RAP3   | 1.080470999 | 0.012647516 |
| ENSG00000105829 | BET1       | 1.080483381 | 0.042267815 |
| ENSG00000136122 | BORA       | 1.080552974 | 0.012555125 |
| ENSG00000211455 | STK38L     | 1.08056061  | 0.009307302 |
| ENSG00000115107 | STEAP3     | 1.080588341 | 0.002521079 |
| ENSG00000147257 | GPC3       | 1.080618171 | 0.019250969 |
| ENSG00000157895 | C12orf43   | 1.080620641 | 1.45E-05    |
| ENSG00000214106 | PAXIP1-AS2 | 1.080634282 | 0.000237521 |
| ENSG00000149554 | CHEK1      | 1.080645021 | 0.009642146 |
| ENSG00000146729 | GBAS       | 1.080653966 | 0.00355993  |
| ENSG00000107745 | MICU1      | 1.08067369  | 0.006479857 |
| ENSG00000175792 | RUVBL1     | 1.080697824 | 0.000247824 |
| ENSG00000109323 | MANBA      | 1.080734849 | 0.004913164 |
| ENSG00000122679 | RAMP3      | 1.080764371 | 0.011802506 |
| ENSG00000135723 | FHOD1      | 1.080779042 | 3.64E-07    |
| ENSG00000256771 | ZNF253     | 1.080791952 | 0.001195734 |
| ENSG00000137804 | NUSAP1     | 1.080792725 | 0.021398889 |
| ENSG00000133574 | GIMAP4     | 1.080866787 | 0.030937887 |
| ENSG00000134690 | CDCA8      | 1.080874659 | 0.023761698 |
| ENSG00000135643 | KCNMB4     | 1.080894478 | 0.007674197 |
| ENSG00000134013 | LOXL2      | 1.08091685  | 0.009020168 |
| ENSG00000152527 | PLEKHH2    | 1.080942711 | 0.000401515 |
| ENSG00000101391 | CDK5RAP1   | 1.081000067 | 3.59E-08    |
| ENSG00000102226 | USP11      | 1.081011059 | 0.007165036 |
| ENSG00000101473 | ACOT8      | 1.081011315 | 0.000527208 |
| ENSG00000132688 | NES        | 1.08105611  | 0.000499976 |
| ENSG00000241945 | PWP2       | 1.081072734 | 1.04E-05    |
| ENSG00000122574 | WIPF3      | 1.081084948 | 0.021832096 |
| ENSG00000140463 | BBS4       | 1.08112528  | 0.00072864  |
| ENSG00000135002 | RFK        | 1.081192931 | 0.013952763 |
| ENSG00000188186 | LAMTOR4    | 1.081213659 | 3.40E-05    |
| ENSG00000131351 | HAUS8      | 1.081241323 | 2.76E-05    |
| ENSG00000176678 | FOXL1      | 1.081250868 | 0.000159517 |
| ENSG00000189046 | ALKBH2     | 1.081256258 | 0.001102191 |
| ENSG00000127314 | RAP1B      | 1.081287058 | 0.046725339 |
| ENSG00000162972 | C2orf47    | 1.08132178  | 6.97E-09    |
| ENSG00000086991 | NOX4       | 1.081329426 | 0.000532752 |
| ENSG00000151503 | NCAPD3     | 1.081364646 | 5.78E-05    |
| ENSG00000101040 | ZMYND8     | 1.081374479 | 0.000381241 |
| ENSG00000141349 | G6PC3      | 1.081374853 | 4.13E-05    |
| ENSG00000198791 | CNOT7      | 1.081379865 | 0.034628708 |
| ENSG00000183856 | IQGAP3     | 1.081404259 | 3.29E-05    |
| ENSG00000164970 | FAM219A    | 1.081410119 | 7.29E-05    |
| ENSG00000090861 | AARS       | 1.081422701 | 0.02033711  |
| ENSG00000004399 | PLXND1     | 1.081430003 | 0.008531869 |

|                 |          |             |             |
|-----------------|----------|-------------|-------------|
| ENSG00000101199 | ARFGAP1  | 1.081435386 | 0.008523304 |
| ENSG00000180998 | GPR137C  | 1.081473262 | 0.047688509 |
| ENSG00000134817 | APLNR    | 1.081580308 | 0.003499052 |
| ENSG00000154144 | TBRG1    | 1.081626462 | 0.000324372 |
| ENSG00000140262 | TCF12    | 1.081642565 | 0.000175271 |
| ENSG00000136451 | VEZF1    | 1.08166382  | 3.09E-05    |
| ENSG00000120697 | ALG5     | 1.081664143 | 0.004492889 |
| ENSG00000120370 | GORAB    | 1.081713332 | 0.004888814 |
| ENSG00000180801 | ARSJ     | 1.081737386 | 0.000321693 |
| ENSG00000131013 | PPIL4    | 1.081751415 | 0.00331464  |
| ENSG00000168646 | AXIN2    | 1.081767429 | 0.003896749 |
| ENSG00000184831 | APOO     | 1.081769002 | 0.002162975 |
| ENSG00000176978 | DPP7     | 1.08180708  | 3.31E-05    |
| ENSG00000105707 | HPN      | 1.081808552 | 0.018901151 |
| ENSG00000139645 | ANKRD52  | 1.081809884 | 6.86E-08    |
| ENSG0000006074  | CCL18    | 1.081810038 | 0.033525667 |
| ENSG00000112763 | BTN2A1   | 1.081825532 | 9.86E-07    |
| ENSG00000197020 | ZNF100   | 1.081846452 | 0.000156604 |
| ENSG00000055163 | CYFIP2   | 1.081884851 | 0.030435961 |
| ENSG00000148123 | LPPR1    | 1.081891233 | 0.023647918 |
| ENSG00000131378 | RFTN1    | 1.081912615 | 1.63E-05    |
| ENSG00000052841 | TTC17    | 1.081929548 | 1.22E-06    |
| ENSG00000162687 | KCNT2    | 1.082052897 | 0.011861767 |
| ENSG00000138814 | PPP3CA   | 1.082098975 | 7.14E-06    |
| ENSG00000204070 | SYS1     | 1.082113994 | 8.02E-05    |
| ENSG00000139168 | ZCRB1    | 1.082143281 | 6.66E-08    |
| ENSG00000136718 | IMP4     | 1.082155287 | 1.34E-06    |
| ENSG00000117834 | SLC5A9   | 1.08218847  | 0.012505478 |
| ENSG00000115942 | ORC2     | 1.082218243 | 5.66E-06    |
| ENSG00000130529 | TRPM4    | 1.082234249 | 0.002010546 |
| ENSG00000171224 | C10orf35 | 1.082284457 | 0.004999165 |
| ENSG00000156973 | PDE6D    | 1.082355508 | 1.73E-05    |
| ENSG00000087338 | GMCL1    | 1.082358478 | 0.000719092 |
| ENSG00000166197 | NOLC1    | 1.082359099 | 2.32E-05    |
| ENSG00000105223 | PLD3     | 1.082384278 | 0.001041678 |
| ENSG00000122870 | BICC1    | 1.082422288 | 0.001007028 |
| ENSG00000204954 | C12orf73 | 1.08242361  | 9.30E-05    |
| ENSG00000101346 | POFUT1   | 1.08244733  | 8.59E-10    |
| ENSG00000173272 | MZT2A    | 1.082451979 | 3.41E-07    |
| ENSG00000120093 | HOXB3    | 1.082502597 | 0.000309834 |
| ENSG00000153936 | HS2ST1   | 1.082506445 | 0.002817444 |
| ENSG00000163655 | GMPS     | 1.082518078 | 0.000438064 |
| ENSG00000186416 | NKRF     | 1.082528596 | 4.35E-05    |
| ENSG00000182866 | LCK      | 1.082546898 | 0.023352706 |
| ENSG00000203760 | CENPW    | 1.082573427 | 0.00671188  |
| ENSG00000079691 | LRRC16A  | 1.082583131 | 0.049669615 |
| ENSG00000143297 | FCRL5    | 1.08258405  | 0.045486156 |

|                 |          |             |             |
|-----------------|----------|-------------|-------------|
| ENSG00000151332 | MBIP     | 1.082585616 | 0.035145256 |
| ENSG00000119684 | MLH3     | 1.082629178 | 3.70E-05    |
| ENSG00000081870 | HSPB11   | 1.082725459 | 5.42E-05    |
| ENSG00000136859 | ANGPTL2  | 1.082742804 | 0.001824824 |
| ENSG00000138036 | DYNC2LI1 | 1.082773201 | 0.012301707 |
| ENSG00000131148 | EMC8     | 1.082818787 | 4.81E-08    |
| ENSG00000164741 | DLC1     | 1.082884092 | 0.00033612  |
| ENSG00000125844 | RRBP1    | 1.082885404 | 0.001118306 |
| ENSG00000135315 | KIAA1009 | 1.082948094 | 0.000524726 |
| ENSG00000065308 | TRAM2    | 1.082983408 | 0.003508766 |
| ENSG00000117983 | MUC5B    | 1.082992718 | 0.028774257 |
| ENSG00000080493 | SLC4A4   | 1.082999594 | 0.009437675 |
| ENSG00000090020 | SLC9A1   | 1.083002597 | 0.000160282 |
| ENSG00000010626 | LRRC23   | 1.083007212 | 6.16E-05    |
| ENSG00000167004 | PDIA3    | 1.08311347  | 0.000983887 |
| ENSG00000244754 | N4BP2L2  | 1.083158132 | 0.000252977 |
| ENSG00000100228 | RAB36    | 1.08316382  | 0.002014171 |
| ENSG00000167258 | CDK12    | 1.083180107 | 0.000362894 |
| ENSG00000088179 | PTPN4    | 1.083187011 | 5.75E-05    |
| ENSG00000162290 | DCP1A    | 1.083239524 | 5.88E-07    |
| ENSG00000125629 | INSIG2   | 1.083259024 | 0.000307792 |
| ENSG00000198952 | SMG5     | 1.083286245 | 4.91E-08    |
| ENSG00000108829 | LRRC59   | 1.083317715 | 0.000182101 |
| ENSG00000167315 | ACAA2    | 1.083444033 | 0.000268765 |
| ENSG00000048828 | FAM120A  | 1.08345809  | 1.18E-08    |
| ENSG00000138193 | PLCE1    | 1.083473481 | 0.043483055 |
| ENSG00000169876 | MUC17    | 1.083509349 | 0.001674697 |
| ENSG00000130309 | COLGALT1 | 1.083574315 | 0.00115793  |
| ENSG00000149483 | TMEM138  | 1.083575767 | 7.38E-06    |
| ENSG00000013275 | PSMC4    | 1.083579996 | 6.86E-06    |
| ENSG00000152778 | IFIT5    | 1.083589732 | 0.011750246 |
| ENSG00000241127 | YAE1D1   | 1.083611993 | 0.000286693 |
| ENSG00000106399 | RPA3     | 1.083633866 | 0.002075766 |
| ENSG00000160190 | SLC37A1  | 1.0836362   | 0.000638684 |
| ENSG00000136731 | UGGT1    | 1.083644235 | 0.000952718 |
| ENSG00000107872 | FBXL15   | 1.083660963 | 0.00029369  |
| ENSG00000106609 | TMEM248  | 1.083742139 | 0.005294922 |
| ENSG00000162298 | SYVN1    | 1.083742657 | 5.67E-05    |
| ENSG00000112769 | LAMA4    | 1.083753036 | 7.33E-07    |
| ENSG00000160741 | CRTC2    | 1.083757235 | 4.16E-06    |
| ENSG00000204610 | TRIM15   | 1.083778196 | 0.045268288 |
| ENSG00000143322 | ABL2     | 1.083782171 | 1.10E-05    |
| ENSG00000105136 | ZNF419   | 1.083799556 | 0.000552892 |
| ENSG00000169891 | REPS2    | 1.083801156 | 0.02528336  |
| ENSG00000005436 | GCFC2    | 1.083836459 | 0.003829605 |
| ENSG00000043143 | JADE2    | 1.0838947   | 3.28E-07    |
| ENSG00000137812 | CASC5    | 1.083930675 | 0.000789159 |

|                 |          |             |             |
|-----------------|----------|-------------|-------------|
| ENSG00000198554 | WDHD1    | 1.083940535 | 0.042054539 |
| ENSG00000120458 | MSANTD2  | 1.083940654 | 0.008291448 |
| ENSG00000139132 | FGD4     | 1.083942743 | 0.001021368 |
| ENSG00000178764 | ZHX2     | 1.083966024 | 3.52E-05    |
| ENSG00000213563 | C8orf82  | 1.084015419 | 0.001580996 |
| ENSG00000137962 | ARHGAP29 | 1.084026054 | 4.18E-05    |
| ENSG00000070950 | RAD18    | 1.084037401 | 5.84E-08    |
| ENSG00000136897 | MRPL50   | 1.084069615 | 0.00014813  |
| ENSG00000117480 | FAAH     | 1.084115601 | 0.01126726  |
| ENSG00000108651 | UTP6     | 1.084128803 | 0.000132842 |
| ENSG00000111364 | DDX55    | 1.084147759 | 0.007227224 |
| ENSG00000169598 | DFFB     | 1.084148881 | 0.01197739  |
| ENSG00000141698 | NT5C3B   | 1.08415057  | 0.006133815 |
| ENSG00000165895 | ARHGAP42 | 1.08416712  | 2.20E-05    |
| ENSG00000113552 | GNPDA1   | 1.08419958  | 0.009253533 |
| ENSG00000166801 | FAM111A  | 1.084243562 | 0.001295586 |
| ENSG00000160991 | ORAI2    | 1.084309857 | 1.58E-06    |
| ENSG00000170703 | TTLL6    | 1.0843265   | 0.020986801 |
| ENSG00000182308 | DCAF4L1  | 1.084369987 | 0.015229398 |
| ENSG00000182319 | SGK223   | 1.084381384 | 0.000165757 |
| ENSG00000149328 | GLB1L2   | 1.084425099 | 0.007798074 |
| ENSG00000126351 | THRA     | 1.084465535 | 1.31E-05    |
| ENSG00000122033 | MTIF3    | 1.084478636 | 0.000310405 |
| ENSG00000244462 | RBM12    | 1.08449624  | 2.92E-05    |
| ENSG00000103056 | SMPD3    | 1.084539741 | 0.001782058 |
| ENSG00000165730 | STOX1    | 1.084561221 | 0.004172507 |
| ENSG00000120686 | UFM1     | 1.084678401 | 0.02190268  |
| ENSG00000198873 | GRK5     | 1.084749802 | 0.023747639 |
| ENSG00000128039 | SRD5A3   | 1.084765368 | 0.012146154 |
| ENSG00000101665 | SMAD7    | 1.084775265 | 0.034015587 |
| ENSG00000178386 | ZNF223   | 1.084803342 | 0.021631503 |
| ENSG00000100065 | CARD10   | 1.084853832 | 2.48E-08    |
| ENSG00000179041 | RRS1     | 1.084865334 | 0.041955398 |
| ENSG00000149346 | SLX4IP   | 1.08486772  | 0.003441913 |
| ENSG00000206535 | LNP1     | 1.084868642 | 8.17E-06    |
| ENSG00000130921 | C12orf65 | 1.084869126 | 4.27E-08    |
| ENSG00000105281 | SLC1A5   | 1.084893679 | 0.000192092 |
| ENSG00000099381 | SETD1A   | 1.084908954 | 7.64E-07    |
| ENSG00000111802 | TDP2     | 1.08491884  | 7.58E-05    |
| ENSG00000140455 | USP3     | 1.084976943 | 0.0214727   |
| ENSG00000228278 | ORM2     | 1.085096393 | 0.02458532  |
| ENSG00000256269 | HMBS     | 1.085109073 | 0.011606371 |
| ENSG00000123143 | PKN1     | 1.085166218 | 0.002246221 |
| ENSG00000163827 | LRRC2    | 1.085180287 | 0.00480724  |
| ENSG00000147872 | PLIN2    | 1.085308685 | 0.025181053 |
| ENSG00000138433 | CIR1     | 1.085325076 | 0.000190249 |
| ENSG00000168496 | FEN1     | 1.08534378  | 0.000749362 |

|                 |          |             |             |
|-----------------|----------|-------------|-------------|
| ENSG00000113456 | RAD1     | 1.085391514 | 0.00167762  |
| ENSG00000114859 | CLCN2    | 1.085458453 | 3.33E-05    |
| ENSG00000138639 | ARHGAP24 | 1.085478688 | 0.000574423 |
| ENSG00000135336 | ORC3     | 1.085490023 | 0.002133895 |
| ENSG00000188732 | FAM221A  | 1.08550136  | 0.003762563 |
| ENSG00000128228 | SDF2L1   | 1.08550333  | 0.000875928 |
| ENSG00000111450 | STX2     | 1.085504225 | 4.39E-05    |
| ENSG00000102890 | ELMO3    | 1.085525231 | 0.008878574 |
| ENSG00000147488 | ST18     | 1.085530165 | 0.047129108 |
| ENSG00000178105 | DDX10    | 1.085539241 | 0.00323874  |
| ENSG00000105708 | ZNF14    | 1.085568322 | 0.003252533 |
| ENSG00000062716 | VMP1     | 1.085576684 | 0.009910685 |
| ENSG00000068438 | FTSJ1    | 1.085586604 | 0.00037625  |
| ENSG00000168214 | RBPJ     | 1.085593455 | 0.037327957 |
| ENSG00000108055 | SMC3     | 1.085611605 | 0.003269818 |
| ENSG00000099998 | GGT5     | 1.085627325 | 4.16E-05    |
| ENSG00000040487 | PQLC2    | 1.085668379 | 6.32E-05    |
| ENSG00000136261 | BZW2     | 1.085674828 | 0.001079943 |
| ENSG00000173207 | CKS1B    | 1.085678477 | 0.001526931 |
| ENSG00000135317 | SNX14    | 1.085701503 | 0.000494    |
| ENSG00000073464 | CLCN4    | 1.085755421 | 5.82E-06    |
| ENSG00000147246 | HTR2C    | 1.085764391 | 0.021240625 |
| ENSG00000269343 | ZNF587B  | 1.085800498 | 0.000305385 |
| ENSG00000134253 | TRIM45   | 1.085820412 | 0.001003811 |
| ENSG00000155438 | NIFK     | 1.085872776 | 1.21E-05    |
| ENSG00000134470 | IL15RA   | 1.08589274  | 0.004223057 |
| ENSG00000072786 | STK10    | 1.085899934 | 0.013881449 |
| ENSG00000108294 | PSMB3    | 1.085905232 | 0.04029428  |
| ENSG00000173821 | RNF213   | 1.085939949 | 2.68E-06    |
| ENSG00000104951 | IL4I1    | 1.085953319 | 0.00015748  |
| ENSG00000162714 | ZNF496   | 1.08600653  | 6.81E-07    |
| ENSG00000118292 | C1orf54  | 1.086092337 | 0.000538143 |
| ENSG00000068650 | ATP11A   | 1.086117338 | 2.42E-09    |
| ENSG00000102755 | FLT1     | 1.086151878 | 0.027876246 |
| ENSG00000076604 | TRAF4    | 1.086158581 | 1.37E-05    |
| ENSG00000081320 | STK17B   | 1.086159158 | 0.003698977 |
| ENSG00000107949 | BCCIP    | 1.086170788 | 0.000105926 |
| ENSG00000102858 | MGRN1    | 1.086190643 | 0.003191299 |
| ENSG00000125505 | MBOAT7   | 1.086200997 | 2.73E-08    |
| ENSG00000104321 | TRPA1    | 1.086219396 | 0.010379313 |
| ENSG00000075539 | FRYL     | 1.086225386 | 2.38E-05    |
| ENSG00000145332 | KLHL8    | 1.086266711 | 0.006092734 |
| ENSG00000100889 | PCK2     | 1.086340692 | 0.034344655 |
| ENSG00000136147 | PHF11    | 1.086361586 | 0.021294267 |
| ENSG00000020922 | MRE11A   | 1.086388939 | 0.000211515 |
| ENSG00000108344 | PSMD3    | 1.086393807 | 0.005701872 |
| ENSG00000106384 | MOGAT3   | 1.086409326 | 0.00602796  |

|                 |          |             |             |
|-----------------|----------|-------------|-------------|
| ENSG00000128513 | POT1     | 1.086443051 | 2.80E-05    |
| ENSG00000109618 | SEPSECS  | 1.086476905 | 0.023068908 |
| ENSG00000153774 | CFDP1    | 1.08649681  | 0.040117119 |
| ENSG00000139946 | PELI2    | 1.086532104 | 0.017505667 |
| ENSG00000070476 | ZXDC     | 1.086588806 | 3.27E-05    |
| ENSG00000242013 | USP27X   | 1.086644937 | 0.002816592 |
| ENSG00000134686 | PHC2     | 1.086675999 | 0.013200181 |
| ENSG00000147459 | DOCK5    | 1.086717031 | 0.011721332 |
| ENSG00000162976 | PQLC3    | 1.086759112 | 0.001349547 |
| ENSG00000198892 | SHISA4   | 1.086794542 | 6.76E-05    |
| ENSG00000198088 | NUP62CL  | 1.086810216 | 0.009698569 |
| ENSG00000130202 | PVRL2    | 1.086838476 | 0.002377607 |
| ENSG00000164684 | ZNF704   | 1.08685859  | 9.72E-07    |
| ENSG00000035141 | FAM136A  | 1.086917047 | 0.000618553 |
| ENSG00000181004 | BBS12    | 1.086927663 | 0.0243177   |
| ENSG00000110628 | SLC22A18 | 1.08701899  | 0.02794003  |
| ENSG00000071894 | CPSF1    | 1.08712607  | 1.12E-07    |
| ENSG00000080824 | HSP90AA1 | 1.087173853 | 0.021203699 |
| ENSG00000181031 | RPH3AL   | 1.087174818 | 0.012552394 |
| ENSG00000094804 | CDC6     | 1.087202457 | 0.002838525 |
| ENSG00000158555 | GDPD5    | 1.087232732 | 0.000659319 |
| ENSG00000167468 | GPX4     | 1.087245292 | 1.98E-06    |
| ENSG00000104835 | SARS2    | 1.087245556 | 0.000200344 |
| ENSG00000138495 | COX17    | 1.087278675 | 0.014467011 |
| ENSG00000149231 | CCDC82   | 1.087292768 | 0.002343897 |
| ENSG00000034533 | ASTE1    | 1.087332253 | 2.12E-05    |
| ENSG00000151748 | SAV1     | 1.087400413 | 5.24E-05    |
| ENSG00000205133 | TRIQK    | 1.087411857 | 0.000490697 |
| ENSG00000101443 | WFDC2    | 1.087540931 | 0.000139785 |
| ENSG00000093009 | CDC45    | 1.087609    | 0.009179749 |
| ENSG00000011258 | MBTD1    | 1.087611631 | 0.043942329 |
| ENSG00000135953 | MFSD9    | 1.087616037 | 6.76E-05    |
| ENSG00000129048 | ACKR4    | 1.087643815 | 0.035206503 |
| ENSG00000154328 | NEIL2    | 1.087648309 | 0.026217308 |
| ENSG00000137842 | TMEM62   | 1.087650618 | 0.022464152 |
| ENSG00000169371 | SNUPN    | 1.087653035 | 3.63E-06    |
| ENSG00000183864 | TOB2     | 1.087666293 | 0.035542821 |
| ENSG00000151240 | DIP2C    | 1.087710408 | 5.19E-05    |
| ENSG00000179588 | ZFPM1    | 1.087735118 | 0.005418107 |
| ENSG00000182154 | MRPL41   | 1.087740388 | 4.19E-08    |
| ENSG00000112761 | WISP3    | 1.087763484 | 0.040870038 |
| ENSG00000136811 | ODF2     | 1.087766537 | 5.21E-06    |
| ENSG00000055332 | EIF2AK2  | 1.087777792 | 0.0448679   |
| ENSG00000135972 | MRPS9    | 1.087791087 | 6.84E-07    |
| ENSG00000136868 | SLC31A1  | 1.087795099 | 0.005508422 |
| ENSG00000142552 | RCN3     | 1.087816952 | 0.027336269 |
| ENSG00000005471 | ABC4     | 1.087891616 | 0.005966693 |

|                 |               |             |             |
|-----------------|---------------|-------------|-------------|
| ENSG00000111731 | C2CD5         | 1.087935011 | 0.028304896 |
| ENSG00000177842 | ZNF620        | 1.088005844 | 0.00074312  |
| ENSG00000126778 | SIX1          | 1.088059426 | 0.000107289 |
| ENSG00000135763 | URB2          | 1.088091977 | 0.000187868 |
| ENSG00000126261 | UBA2          | 1.088133048 | 2.29E-05    |
| ENSG00000196367 | TRRAP         | 1.088199553 | 0.001990919 |
| ENSG00000101407 | TTI1          | 1.088226936 | 0.022417489 |
| ENSG00000203876 | RP11-451M19.3 | 1.08823786  | 0.007982084 |
| ENSG00000188158 | NHS           | 1.088245406 | 0.005102441 |
| ENSG00000161638 | ITGA5         | 1.088271501 | 0.000156056 |
| ENSG00000101049 | SGK2          | 1.088340525 | 0.0484131   |
| ENSG00000165684 | SNAPC4        | 1.08835797  | 3.81E-07    |
| ENSG00000166669 | ATF7IP2       | 1.08838606  | 0.001220053 |
| ENSG00000187569 | DPPA3         | 1.088391717 | 0.04343286  |
| ENSG00000145685 | LHFPL2        | 1.088444085 | 0.017932117 |
| ENSG00000078579 | FGF20         | 1.088457179 | 0.009162142 |
| ENSG00000131373 | HACL1         | 1.088513719 | 2.88E-05    |
| ENSG00000186871 | ERCC6L        | 1.08852015  | 0.006802843 |
| ENSG00000060339 | CCAR1         | 1.088523192 | 3.19E-08    |
| ENSG00000166803 | KIAA0101      | 1.0885301   | 0.024255367 |
| ENSG00000168890 | TMEM150A      | 1.088611573 | 3.58E-05    |
| ENSG00000082898 | XPO1          | 1.088611795 | 0.03025473  |
| ENSG00000103550 | KNOP1         | 1.088657304 | 3.88E-05    |
| ENSG00000198855 | FICD          | 1.088712541 | 0.002332785 |
| ENSG00000165752 | STK32C        | 1.088713911 | 1.71E-05    |
| ENSG00000166004 | KIAA1731      | 1.08871899  | 9.77E-05    |
| ENSG00000168566 | SNRNP48       | 1.088724709 | 0.000901861 |
| ENSG00000161013 | MGAT4B        | 1.088762944 | 0.019318495 |
| ENSG00000196712 | NF1           | 1.088832295 | 2.66E-07    |
| ENSG00000184162 | NR2C2AP       | 1.088868228 | 2.78E-06    |
| ENSG00000196507 | TCEAL3        | 1.088870981 | 0.000671916 |
| ENSG00000136869 | TLR4          | 1.08889462  | 2.01E-05    |
| ENSG00000170035 | UBE2E3        | 1.088895713 | 3.97E-08    |
| ENSG00000104218 | CSPP1         | 1.088925293 | 2.23E-05    |
| ENSG00000156384 | SFR1          | 1.088932863 | 0.001336724 |
| ENSG00000122729 | ACO1          | 1.088934671 | 2.74E-05    |
| ENSG00000198908 | BHLHB9        | 1.088939255 | 0.012153482 |
| ENSG00000129083 | COPB1         | 1.088940954 | 0.017526659 |
| ENSG00000143889 | HNRNPLL       | 1.088964031 | 2.66E-05    |
| ENSG00000163882 | POLR2H        | 1.088966979 | 0.000595922 |
| ENSG00000120659 | TNFSF11       | 1.088972664 | 0.000291181 |
| ENSG00000143867 | OSR1          | 1.08898815  | 0.000509928 |
| ENSG00000204386 | NEU1          | 1.08902357  | 0.049696892 |
| ENSG00000255394 | C8orf49       | 1.089049249 | 0.007394263 |
| ENSG00000076555 | ACACB         | 1.089123041 | 0.001975193 |
| ENSG00000169122 | FAM110B       | 1.089129615 | 0.010164379 |
| ENSG00000183098 | GPC6          | 1.089160048 | 6.51E-05    |

|                 |              |             |             |
|-----------------|--------------|-------------|-------------|
| ENSG00000153147 | SMARCA5      | 1.089207159 | 1.04E-05    |
| ENSG00000184979 | USP18        | 1.089218671 | 0.014717646 |
| ENSG00000198089 | SFI1         | 1.089231322 | 5.56E-05    |
| ENSG00000112242 | E2F3         | 1.089281419 | 0.011691633 |
| ENSG00000054793 | ATP9A        | 1.089312939 | 0.007015028 |
| ENSG00000163902 | RPN1         | 1.089313705 | 3.98E-05    |
| ENSG00000118900 | UBN1         | 1.089349232 | 2.08E-09    |
| ENSG00000171843 | MLLT3        | 1.089387972 | 0.002248274 |
| ENSG00000140525 | FANCI        | 1.089397018 | 0.011383775 |
| ENSG00000136518 | ACTL6A       | 1.089397178 | 0.010092043 |
| ENSG00000184545 | DUSP8        | 1.08940888  | 0.016023301 |
| ENSG00000146592 | CREB5        | 1.089490431 | 0.000991913 |
| ENSG00000196247 | ZNF107       | 1.089531729 | 6.74E-05    |
| ENSG00000264324 | RP11-287D1.3 | 1.08957182  | 0.001532408 |
| ENSG00000108270 | AATF         | 1.08958208  | 0.000136987 |
| ENSG00000100888 | CHD8         | 1.089588658 | 0.007035954 |
| ENSG00000181610 | MRPS23       | 1.089598315 | 2.42E-05    |
| ENSG00000096872 | IFT74        | 1.089608126 | 0.042409235 |
| ENSG00000104897 | SF3A2        | 1.089666204 | 0.008619867 |
| ENSG00000099849 | RASSF7       | 1.089693105 | 1.87E-06    |
| ENSG00000167513 | CDT1         | 1.089696849 | 0.004871033 |
| ENSG00000124688 | MAD2L1BP     | 1.089699732 | 5.03E-06    |
| ENSG00000171055 | FEZ2         | 1.089702363 | 2.30E-06    |
| ENSG00000174485 | DENND4A      | 1.089762723 | 0.010426693 |
| ENSG00000125901 | MRPS26       | 1.089784916 | 4.80E-07    |
| ENSG00000184990 | SIVA1        | 1.089791872 | 1.40E-06    |
| ENSG00000115239 | GPR75-ASB3   | 1.089817734 | 0.003001727 |
| ENSG00000136010 | ALDH1L2      | 1.089873546 | 4.24E-05    |
| ENSG00000163781 | TOPBP1       | 1.089906266 | 0.018192399 |
| ENSG00000125046 | SSUH2        | 1.089982443 | 0.003996793 |
| ENSG00000144591 | GMPPA        | 1.089999485 | 0.001746678 |
| ENSG00000061656 | SPAG4        | 1.090012166 | 0.027183251 |
| ENSG00000109805 | NCAPG        | 1.090033147 | 0.015946225 |
| ENSG00000169718 | DUS1L        | 1.090053472 | 1.33E-07    |
| ENSG00000249437 | NAIP         | 1.090091263 | 0.000882753 |
| ENSG00000063176 | SPHK2        | 1.090198734 | 4.75E-06    |
| ENSG00000183486 | MX2          | 1.090227934 | 0.010408026 |
| ENSG00000044574 | HSPA5        | 1.090229969 | 0.001556224 |
| ENSG00000165661 | QSOX2        | 1.090257416 | 1.58E-06    |
| ENSG00000076864 | RAP1GAP      | 1.090263496 | 0.042078378 |
| ENSG00000137871 | ZNF280D      | 1.090295517 | 0.000174972 |
| ENSG00000115275 | MOGS         | 1.090325385 | 0.005706228 |
| ENSG00000135070 | ISCA1        | 1.090329098 | 1.54E-07    |
| ENSG00000138152 | BTBD16       | 1.090365558 | 0.047648816 |
| ENSG00000166128 | RAB8B        | 1.090373109 | 3.18E-05    |
| ENSG00000185532 | PRKG1        | 1.090380897 | 7.80E-06    |
| ENSG00000183971 | NPW          | 1.090407702 | 0.014474703 |

|                 |          |             |             |
|-----------------|----------|-------------|-------------|
| ENSG00000174469 | CNTNAP2  | 1.090426077 | 0.003939661 |
| ENSG00000089123 | TASP1    | 1.090624319 | 0.000192118 |
| ENSG00000235034 | C19orf81 | 1.09062523  | 0.029252151 |
| ENSG00000138382 | METTL5   | 1.090649673 | 5.43E-08    |
| ENSG00000058085 | LAMC2    | 1.09065844  | 0.002346604 |
| ENSG00000203859 | HSD3B2   | 1.090673312 | 0.030852519 |
| ENSG00000101126 | ADNP     | 1.090716269 | 2.91E-09    |
| ENSG00000128050 | PAICS    | 1.090722081 | 0.000354546 |
| ENSG00000111644 | ACRBP    | 1.090767488 | 0.001053146 |
| ENSG00000263002 | ZNF234   | 1.090787352 | 0.011118385 |
| ENSG00000158457 | TSPAN33  | 1.090817876 | 3.04E-05    |
| ENSG00000117707 | PROX1    | 1.090874628 | 0.00297099  |
| ENSG00000169967 | MAP3K2   | 1.090881862 | 1.11E-08    |
| ENSG00000147955 | SIGMAR1  | 1.090896545 | 7.59E-05    |
| ENSG00000185187 | SIGIRR   | 1.090944369 | 0.000944068 |
| ENSG00000137574 | TGS1     | 1.090959772 | 0.012492005 |
| ENSG00000074590 | NUAK1    | 1.090976121 | 0.008592485 |
| ENSG00000130204 | TOMM40   | 1.091050871 | 2.77E-05    |
| ENSG00000167588 | GPD1     | 1.091055928 | 0.000191932 |
| ENSG00000127334 | DYRK2    | 1.091127831 | 0.023159476 |
| ENSG00000132819 | RBM38    | 1.091129687 | 0.030037419 |
| ENSG00000109881 | CCDC34   | 1.091130648 | 1.69E-05    |
| ENSG00000171130 | ATP6V0E2 | 1.09114287  | 0.028929837 |
| ENSG00000182481 | KPNA2    | 1.091215938 | 0.005021123 |
| ENSG00000138074 | SLC5A6   | 1.09123946  | 1.38E-05    |
| ENSG00000157613 | CREB3L1  | 1.091262909 | 0.002639597 |
| ENSG00000121057 | AKAP1    | 1.091270263 | 0.008546572 |
| ENSG00000100077 | ADRBK2   | 1.091293473 | 0.007823137 |
| ENSG00000183475 | ASB7     | 1.091313356 | 8.89E-06    |
| ENSG00000139974 | SLC38A6  | 1.091404106 | 0.004786479 |
| ENSG00000198382 | UVRAG    | 1.091404776 | 0.030646794 |
| ENSG00000165424 | ZCCHC24  | 1.091416554 | 0.004527735 |
| ENSG00000165973 | NELL1    | 1.091459223 | 0.020013683 |
| ENSG00000121797 | CCRL2    | 1.091473205 | 0.002938594 |
| ENSG00000188818 | ZDHHC11  | 1.091473715 | 0.037220004 |
| ENSG00000122034 | GTF3A    | 1.091506067 | 0.009871175 |
| ENSG00000135929 | CYP27A1  | 1.091539776 | 0.002368381 |
| ENSG00000141574 | SECTM1   | 1.091544101 | 0.013450779 |
| ENSG00000132953 | XPO4     | 1.09161021  | 8.55E-05    |
| ENSG00000227507 | LTB      | 1.091671466 | 0.033483278 |
| ENSG00000123989 | CHPF     | 1.091673489 | 0.002530122 |
| ENSG00000130755 | GMFG     | 1.091673625 | 0.012068183 |
| ENSG00000115896 | PLCL1    | 1.091813291 | 6.22E-05    |
| ENSG00000180448 | HMHA1    | 1.091817652 | 0.043264489 |
| ENSG00000152193 | RNF219   | 1.091841195 | 0.018815809 |
| ENSG00000203705 | TATDN3   | 1.091893555 | 3.20E-06    |
| ENSG00000144445 | KANSL1L  | 1.091963729 | 0.002358324 |

|                 |          |             |             |
|-----------------|----------|-------------|-------------|
| ENSG00000009413 | REV3L    | 1.091978611 | 0.000444257 |
| ENSG00000144747 | TMF1     | 1.09197942  | 2.81E-05    |
| ENSG00000104660 | LEPROTL1 | 1.092039514 | 0.001622394 |
| ENSG00000198551 | ZNF627   | 1.092057793 | 3.33E-06    |
| ENSG00000152904 | GGPS1    | 1.092092973 | 0.000662417 |
| ENSG00000120539 | MASTL    | 1.092108909 | 0.020654205 |
| ENSG00000177697 | CD151    | 1.092144807 | 0.010523132 |
| ENSG00000158966 | CACHD1   | 1.092145515 | 0.023994897 |
| ENSG00000162174 | ASRGL1   | 1.092146665 | 0.047342888 |
| ENSG00000163840 | DTX3L    | 1.092153134 | 5.38E-06    |
| ENSG00000163346 | PBXIP1   | 1.092185827 | 2.41E-05    |
| ENSG00000120725 | SIL1     | 1.092194575 | 0.001420535 |
| ENSG00000114861 | FOXP1    | 1.092214339 | 4.10E-07    |
| ENSG00000065150 | IPO5     | 1.092230809 | 0.000240995 |
| ENSG00000166352 | C11orf74 | 1.092300643 | 0.00570568  |
| ENSG00000197798 | FAM118B  | 1.092312337 | 0.000135353 |
| ENSG00000119977 | TCTN3    | 1.09233212  | 1.31E-06    |
| ENSG00000143498 | TAF1A    | 1.092350401 | 0.005668042 |
| ENSG00000143740 | SNAP47   | 1.092397979 | 1.32E-07    |
| ENSG00000197905 | TEAD4    | 1.092401885 | 0.005067758 |
| ENSG00000112031 | MTRF1L   | 1.092402857 | 4.77E-07    |
| ENSG00000151849 | CENPJ    | 1.09244175  | 0.000183248 |
| ENSG00000147457 | CHMP7    | 1.092547406 | 0.007422642 |
| ENSG00000117419 | ERI3     | 1.092620631 | 2.68E-05    |
| ENSG00000156171 | DRAM2    | 1.09263472  | 8.61E-05    |
| ENSG00000090520 | DNAJB11  | 1.092650516 | 1.57E-06    |
| ENSG00000081237 | PTPRC    | 1.092656522 | 0.040533036 |
| ENSG00000120675 | DNAJC15  | 1.09266177  | 0.001214008 |
| ENSG00000165733 | BMS1     | 1.092715983 | 0.010016971 |
| ENSG00000197165 | SULT1A2  | 1.092742157 | 0.017791997 |
| ENSG00000167711 | SERPINF2 | 1.092770568 | 0.000869935 |
| ENSG00000089048 | ESF1     | 1.092784026 | 0.041840873 |
| ENSG00000130748 | TMEM160  | 1.092791076 | 0.000380018 |
| ENSG00000104529 | EEF1D    | 1.092829033 | 0.000118299 |
| ENSG00000169946 | ZFPM2    | 1.09290011  | 0.02481287  |
| ENSG00000136630 | HLX      | 1.092909718 | 3.18E-05    |
| ENSG00000105967 | TFEC     | 1.092918565 | 0.008581843 |
| ENSG00000168081 | PNOC     | 1.093047887 | 0.03824989  |
| ENSG00000130948 | HSD17B3  | 1.093073787 | 0.001016471 |
| ENSG00000171150 | SOCS5    | 1.093089823 | 0.00019376  |
| ENSG00000183718 | TRIM52   | 1.093093488 | 0.000877426 |
| ENSG00000125257 | ABCC4    | 1.093125258 | 0.001774621 |
| ENSG00000188636 | LDOC1L   | 1.09312638  | 9.62E-06    |
| ENSG00000181045 | SLC26A11 | 1.09313228  | 3.25E-05    |
| ENSG00000144381 | HSPD1    | 1.09314657  | 0.014082329 |
| ENSG00000168792 | ABHD15   | 1.093188108 | 0.001234267 |
| ENSG00000118946 | PCDH17   | 1.093300756 | 0.039393113 |

|                 |          |             |             |
|-----------------|----------|-------------|-------------|
| ENSG00000110218 | PANX1    | 1.093328436 | 0.005096087 |
| ENSG00000184661 | CDCA2    | 1.093337009 | 0.000644925 |
| ENSG00000011465 | DCN      | 1.093337857 | 0.019138742 |
| ENSG00000181555 | SETD2    | 1.093341387 | 5.11E-09    |
| ENSG00000170312 | CDK1     | 1.093350964 | 0.007487606 |
| ENSG00000143643 | TTC13    | 1.093375569 | 0.002739594 |
| ENSG00000152749 | GPR180   | 1.093396218 | 2.61E-05    |
| ENSG00000167703 | SLC43A2  | 1.09340082  | 2.55E-05    |
| ENSG00000196155 | PLEKHG4  | 1.093470084 | 0.000147834 |
| ENSG00000121691 | CAT      | 1.093479033 | 0.000134933 |
| ENSG00000169359 | SLC33A1  | 1.093480155 | 0.034045327 |
| ENSG00000165689 | SDCCAG3  | 1.093519139 | 0.004472094 |
| ENSG00000197299 | BLM      | 1.093527055 | 0.008073043 |
| ENSG00000146072 | TNFRSF21 | 1.093665057 | 0.023174188 |
| ENSG00000110046 | ATG2A    | 1.093673519 | 2.24E-07    |
| ENSG00000066379 | ZNRD1    | 1.093675315 | 2.03E-05    |
| ENSG00000143226 | FCGR2A   | 1.093677387 | 0.028079435 |
| ENSG00000198000 | NOL8     | 1.093814588 | 0.000696884 |
| ENSG00000162755 | KLHDC9   | 1.09383264  | 0.001054951 |
| ENSG00000099250 | NRP1     | 1.093860083 | 5.38E-05    |
| ENSG00000198324 | FAM109A  | 1.093970712 | 1.55E-05    |
| ENSG00000117724 | CENPF    | 1.094033999 | 0.010241296 |
| ENSG00000146670 | CDCA5    | 1.094035461 | 0.000478684 |
| ENSG00000112365 | ZBTB24   | 1.094063223 | 0.006925903 |
| ENSG00000130413 | STK33    | 1.094078028 | 0.000348433 |
| ENSG00000242265 | PEG10    | 1.094134372 | 0.010414928 |
| ENSG00000006740 | ARHGAP44 | 1.094164817 | 0.006582019 |
| ENSG00000135916 | ITM2C    | 1.094224542 | 0.045243515 |
| ENSG00000137834 | SMAD6    | 1.094237689 | 6.46E-07    |
| ENSG00000138686 | BBS7     | 1.094252298 | 0.000238565 |
| ENSG00000109736 | MFSD10   | 1.094308898 | 0.002529917 |
| ENSG00000167333 | TRIM68   | 1.094399885 | 4.37E-05    |
| ENSG00000118600 | TMEM5    | 1.094415168 | 0.041032708 |
| ENSG00000114446 | IFT57    | 1.094419761 | 1.05E-05    |
| ENSG00000119004 | CYP20A1  | 1.094515671 | 1.41E-06    |
| ENSG00000163378 | EOGT     | 1.094553564 | 0.007593115 |
| ENSG00000239900 | ADSL     | 1.094583204 | 1.29E-06    |
| ENSG00000163166 | IWS1     | 1.094660313 | 4.62E-13    |
| ENSG00000152518 | ZFP36L2  | 1.094783489 | 0.003919232 |
| ENSG00000179456 | ZBTB18   | 1.094793033 | 7.17E-06    |
| ENSG00000089639 | GMIP     | 1.094886194 | 0.004504308 |
| ENSG00000105717 | PBX4     | 1.094942277 | 0.000286461 |
| ENSG00000166012 | TAF1D    | 1.094951677 | 0.045128851 |
| ENSG00000112294 | ALDH5A1  | 1.094961549 | 0.00302728  |
| ENSG00000103449 | SALL1    | 1.095000164 | 1.33E-05    |
| ENSG00000157778 | PSMG3    | 1.095052971 | 1.16E-07    |
| ENSG00000130768 | SMPDL3B  | 1.095056376 | 0.049697484 |

|                 |           |             |             |
|-----------------|-----------|-------------|-------------|
| ENSG00000152457 | DCLRE1C   | 1.095147413 | 0.046246103 |
| ENSG0000001626  | CFTR      | 1.095168335 | 0.012507372 |
| ENSG00000234545 | FAM133B   | 1.095178466 | 0.001298721 |
| ENSG00000013288 | MAN2B2    | 1.095191033 | 0.00028057  |
| ENSG00000043462 | LCP2      | 1.095217973 | 0.014847467 |
| ENSG00000105185 | PDCD5     | 1.095260835 | 1.30E-05    |
| ENSG00000187372 | PCDHB13   | 1.095274886 | 0.005381199 |
| ENSG00000156265 | MAP3K7CL  | 1.095329157 | 0.000591648 |
| ENSG00000163864 | NMNAT3    | 1.095373157 | 0.00066059  |
| ENSG00000114988 | LMAN2L    | 1.095383498 | 9.76E-08    |
| ENSG00000005059 | CCDC109B  | 1.095517557 | 0.011388318 |
| ENSG00000166750 | SLFN5     | 1.09557329  | 0.000195594 |
| ENSG00000120696 | KBTBD7    | 1.09562252  | 0.000478364 |
| ENSG00000141497 | ZMYND15   | 1.095646018 | 1.15E-05    |
| ENSG00000140526 | ABHD2     | 1.095697947 | 0.021446476 |
| ENSG00000119431 | HDHD3     | 1.09579428  | 0.000441317 |
| ENSG00000169955 | ZNF747    | 1.095873806 | 4.79E-05    |
| ENSG00000140379 | BCL2A1    | 1.095895861 | 0.024199977 |
| ENSG00000184489 | PTP4A3    | 1.095909237 | 0.041376824 |
| ENSG00000105821 | DNAJC2    | 1.09597322  | 0.009445056 |
| ENSG00000242247 | ARFGAP3   | 1.095974445 | 4.58E-06    |
| ENSG00000164822 | DEFA6     | 1.095981109 | 0.03270639  |
| ENSG00000125753 | VASP      | 1.09601651  | 0.001116444 |
| ENSG00000083444 | PLOD1     | 1.096024753 | 0.004859573 |
| ENSG00000105518 | TMEM205   | 1.0960607   | 1.83E-06    |
| ENSG00000179632 | MAF1      | 1.096094208 | 3.64E-05    |
| ENSG00000179178 | TMEM125   | 1.096124422 | 0.002265395 |
| ENSG00000162897 | FCAMR     | 1.096173946 | 0.006074301 |
| ENSG00000122566 | HNRNPA2B1 | 1.096224845 | 0.004250092 |
| ENSG00000049759 | NEDD4L    | 1.096242112 | 0.002750655 |
| ENSG00000023171 | GRAMD1B   | 1.096247308 | 0.012598834 |
| ENSG00000132205 | EMILIN2   | 1.096285855 | 6.10E-08    |
| ENSG00000182325 | FBXL6     | 1.096296278 | 3.19E-05    |
| ENSG00000154743 | TSEN2     | 1.096332212 | 0.00034942  |
| ENSG00000234745 | HLA-B     | 1.096332254 | 4.07E-05    |
| ENSG00000017483 | SLC38A5   | 1.096348802 | 0.044399996 |
| ENSG00000125686 | MED1      | 1.096364193 | 0.000939049 |
| ENSG00000143952 | VPS54     | 1.096430343 | 0.048675338 |
| ENSG00000189050 | RNFT1     | 1.096503078 | 0.005934574 |
| ENSG00000112304 | ACOT13    | 1.096523855 | 0.002600417 |
| ENSG00000223865 | HLA-DPB1  | 1.096618234 | 0.021401221 |
| ENSG00000176261 | ZBTB8OS   | 1.09662977  | 3.24E-06    |
| ENSG00000090776 | EFNB1     | 1.096633446 | 7.23E-05    |
| ENSG00000097007 | ABL1      | 1.096633489 | 1.01E-06    |
| ENSG00000118482 | PHF3      | 1.096633633 | 8.75E-08    |
| ENSG00000144120 | TMEM177   | 1.096674669 | 0.015768818 |
| ENSG00000149600 | COMMD7    | 1.096768516 | 1.03E-10    |

|                 |          |             |             |
|-----------------|----------|-------------|-------------|
| ENSG00000163794 | UCN      | 1.096785798 | 0.00085786  |
| ENSG00000110811 | LEPREL2  | 1.096803526 | 0.000441299 |
| ENSG00000177119 | ANO6     | 1.09686903  | 4.91E-08    |
| ENSG00000174669 | SLC29A2  | 1.096933038 | 3.39E-05    |
| ENSG00000136770 | DNAJC1   | 1.096945289 | 7.14E-12    |
| ENSG00000115935 | WIPF1    | 1.096948691 | 0.020045904 |
| ENSG00000100196 | KDELR3   | 1.097014737 | 0.010315875 |
| ENSG00000154864 | PIEZO2   | 1.097035444 | 0.000582299 |
| ENSG00000111358 | GTF2H3   | 1.097102509 | 0.01166912  |
| ENSG00000166326 | TRIM44   | 1.097123268 | 2.68E-07    |
| ENSG00000198040 | ZNF84    | 1.097215372 | 0.000443514 |
| ENSG00000170264 | FAM161A  | 1.097216906 | 8.10E-05    |
| ENSG00000175311 | ANKS4B   | 1.097249318 | 0.006878612 |
| ENSG00000162929 | KIAA1841 | 1.097344417 | 8.66E-06    |
| ENSG00000186020 | ZNF529   | 1.097453855 | 0.000626446 |
| ENSG00000172183 | ISG20    | 1.097456378 | 3.01E-05    |
| ENSG00000163382 | APOA1BP  | 1.097459292 | 1.49E-08    |
| ENSG00000102030 | NAA10    | 1.09747889  | 4.17E-06    |
| ENSG00000133065 | SLC41A1  | 1.097480884 | 4.60E-05    |
| ENSG00000196757 | ZNF700   | 1.09748436  | 0.00547895  |
| ENSG00000145819 | ARHGAP26 | 1.097634693 | 0.001245432 |
| ENSG00000108821 | COL1A1   | 1.097645834 | 0.011512105 |
| ENSG00000138231 | DBR1     | 1.097711545 | 0.001577776 |
| ENSG00000183814 | LIN9     | 1.097771514 | 3.63E-05    |
| ENSG00000178096 | BOLA1    | 1.097858381 | 8.75E-05    |
| ENSG00000164818 | HEATR2   | 1.097863484 | 6.48E-06    |
| ENSG00000146242 | TPBG     | 1.097935291 | 0.000320435 |
| ENSG00000177888 | ZBTB41   | 1.097954742 | 4.45E-07    |
| ENSG00000124541 | RRP36    | 1.097971803 | 3.96E-05    |
| ENSG00000155304 | HSPA13   | 1.098024805 | 0.014486997 |
| ENSG00000136231 | IGF2BP3  | 1.098112112 | 0.031351453 |
| ENSG00000165458 | INPPL1   | 1.098166671 | 0.000312316 |
| ENSG00000087088 | BAX      | 1.098178854 | 0.00530167  |
| ENSG00000136295 | TTYH3    | 1.098234944 | 1.55E-06    |
| ENSG00000205352 | PRR13    | 1.098326596 | 0.00101751  |
| ENSG00000144935 | TRPC1    | 1.098349526 | 0.0014951   |
| ENSG00000144659 | SLC25A38 | 1.098353048 | 2.54E-06    |
| ENSG00000139372 | TDG      | 1.098370165 | 0.047400289 |
| ENSG00000143315 | PIGM     | 1.09837111  | 1.27E-05    |
| ENSG00000175877 | WBSCR28  | 1.098466321 | 0.000462148 |
| ENSG00000010803 | SCMH1    | 1.098532729 | 5.20E-05    |
| ENSG00000148803 | FUOM     | 1.098536388 | 0.000119605 |
| ENSG00000134398 | ERN2     | 1.098540676 | 0.001474264 |
| ENSG00000078237 | C12orf5  | 1.098585419 | 0.006236639 |
| ENSG00000102316 | MAGED2   | 1.098610283 | 2.40E-05    |
| ENSG00000259120 | SMIM6    | 1.098621695 | 0.001966543 |
| ENSG00000142192 | APP      | 1.098661415 | 0.02762219  |

|                 |          |             |             |
|-----------------|----------|-------------|-------------|
| ENSG00000112562 | SMOC2    | 1.098737447 | 0.023184368 |
| ENSG00000086589 | RBM22    | 1.098793612 | 0.001197368 |
| ENSG00000077684 | JADE1    | 1.098801686 | 0.000346383 |
| ENSG00000114423 | CBLB     | 1.098893228 | 0.004116756 |
| ENSG00000108666 | C17orf75 | 1.098924864 | 0.000426267 |
| ENSG00000126216 | TUBGCP3  | 1.098981958 | 0.007970946 |
| ENSG00000123352 | SPATS2   | 1.099028564 | 1.92E-06    |
| ENSG00000189362 | TMEM194B | 1.099060417 | 0.000355442 |
| ENSG00000143390 | RFX5     | 1.099154689 | 1.96E-05    |
| ENSG00000117500 | TMED5    | 1.099199542 | 1.02E-06    |
| ENSG00000102699 | PARP4    | 1.099223215 | 2.98E-05    |
| ENSG00000066651 | TRMT11   | 1.099280279 | 7.46E-06    |
| ENSG00000179604 | CDC42EP4 | 1.09936024  | 7.58E-07    |
| ENSG00000096433 | ITPR3    | 1.099362039 | 0.002199539 |
| ENSG00000114631 | PODXL2   | 1.09936374  | 0.04760862  |
| ENSG00000197056 | ZMYM1    | 1.099407913 | 0.025672438 |
| ENSG00000145216 | FIP1L1   | 1.0994348   | 1.57E-05    |
| ENSG00000147119 | CHST7    | 1.099435986 | 0.002125982 |
| ENSG00000088899 | LZTS3    | 1.099531716 | 0.003781744 |
| ENSG00000113739 | STC2     | 1.099580818 | 0.000642368 |
| ENSG00000103152 | MPG      | 1.099715124 | 0.000289678 |
| ENSG00000122140 | MRPS2    | 1.099723502 | 3.89E-05    |
| ENSG00000161896 | IP6K3    | 1.099812743 | 0.02707761  |
| ENSG00000105397 | TYK2     | 1.099870378 | 0.00074728  |
| ENSG00000167272 | POP5     | 1.099887066 | 1.19E-06    |
| ENSG00000178691 | SUZ12    | 1.099894732 | 0.016704315 |
| ENSG00000176410 | DNAJC30  | 1.099975749 | 5.62E-06    |
| ENSG00000124279 | FASTKD3  | 1.099990444 | 0.000271015 |
| ENSG00000101138 | CSTF1    | 1.100054961 | 3.15E-06    |
| ENSG00000105664 | COMP     | 1.100068262 | 0.039138268 |
| ENSG00000196781 | TLE1     | 1.100249599 | 4.47E-08    |
| ENSG00000165507 | C10orf10 | 1.100304298 | 0.03280395  |
| ENSG00000183161 | FANCF    | 1.10036671  | 0.007540499 |
| ENSG00000197461 | PDGFA    | 1.100423422 | 0.026747379 |
| ENSG00000176890 | TYMS     | 1.100427172 | 0.020169213 |
| ENSG00000185716 | C16orf52 | 1.100434565 | 2.76E-05    |
| ENSG00000116337 | AMPD2    | 1.100448907 | 0.004305415 |
| ENSG00000166900 | STX3     | 1.100463941 | 0.000112444 |
| ENSG00000185088 | RPS27L   | 1.100493213 | 0.010737905 |
| ENSG00000134198 | TSPAN2   | 1.100494838 | 0.00437182  |
| ENSG00000177606 | JUN      | 1.10053678  | 0.000403107 |
| ENSG00000129195 | FAM64A   | 1.10055008  | 0.000166251 |
| ENSG00000197702 | PARVA    | 1.100568345 | 1.77E-05    |
| ENSG00000149781 | FERMT3   | 1.100628877 | 0.002659687 |
| ENSG00000086061 | DNAJA1   | 1.100665458 | 0.008435845 |
| ENSG00000188559 | RALGAPA2 | 1.100710573 | 5.76E-06    |
| ENSG00000198887 | SMC5     | 1.100717482 | 0.022042293 |

|                 |          |             |             |
|-----------------|----------|-------------|-------------|
| ENSG00000130038 | EFCAB4B  | 1.100742098 | 0.000104906 |
| ENSG00000198792 | TMEM184B | 1.10078667  | 0.006358344 |
| ENSG00000011376 | LARS2    | 1.100804352 | 1.80E-05    |
| ENSG00000185010 | F8       | 1.100867698 | 0.003600446 |
| ENSG00000157637 | SLC38A10 | 1.100894459 | 0.000140075 |
| ENSG00000174010 | KLHL15   | 1.10089505  | 0.000457294 |
| ENSG00000106089 | STX1A    | 1.100934477 | 1.40E-10    |
| ENSG00000198740 | ZNF652   | 1.100970536 | 7.89E-06    |
| ENSG00000178999 | AURKB    | 1.100987102 | 0.049987831 |
| ENSG00000077147 | TM9SF3   | 1.10102347  | 0.026032486 |
| ENSG00000180532 | ZSCAN4   | 1.101096161 | 0.002063823 |
| ENSG00000151364 | KCTD14   | 1.101136348 | 0.020777886 |
| ENSG00000211648 | IGLV1-47 | 1.101138915 | 0.008956903 |
| ENSG00000171951 | SCG2     | 1.101141162 | 0.026550573 |
| ENSG00000196503 | ARL9     | 1.101152327 | 0.014071916 |
| ENSG00000146477 | SLC22A3  | 1.101222015 | 0.043533668 |
| ENSG00000139835 | GRTP1    | 1.101246173 | 0.000264865 |
| ENSG00000152804 | HHEX     | 1.101257109 | 0.023991656 |
| ENSG00000126243 | LRFN3    | 1.101323584 | 0.004652681 |
| ENSG00000198286 | CARD11   | 1.10132871  | 0.000550886 |
| ENSG00000142089 | IFITM3   | 1.101374664 | 0.001135758 |
| ENSG00000026297 | RNASET2  | 1.101424294 | 0.007718145 |
| ENSG00000106346 | USP42    | 1.101424871 | 7.82E-12    |
| ENSG00000138640 | FAM13A   | 1.101433263 | 0.001210296 |
| ENSG00000163811 | WDR43    | 1.101439791 | 0.036528595 |
| ENSG00000018610 | CXorf56  | 1.101450362 | 0.00131947  |
| ENSG00000163956 | LRPAP1   | 1.101471309 | 1.28E-06    |
| ENSG00000156787 | TBC1D31  | 1.101480965 | 0.049506861 |
| ENSG00000160999 | SH2B2    | 1.101487251 | 0.00668841  |
| ENSG00000168303 | MPLKIP   | 1.10159807  | 2.09E-05    |
| ENSG00000153814 | JAZF1    | 1.101611816 | 0.005381346 |
| ENSG00000171241 | SHCBP1   | 1.101744426 | 0.028363369 |
| ENSG00000106772 | PRUNE2   | 1.101774842 | 0.003790801 |
| ENSG00000125743 | SNRPD2   | 1.101802805 | 1.47E-08    |
| ENSG00000175054 | ATR      | 1.101849045 | 0.007518605 |
| ENSG00000066185 | ZMYND12  | 1.101880285 | 0.002804473 |
| ENSG00000196652 | ZKSCAN5  | 1.101888749 | 7.47E-07    |
| ENSG00000166260 | COX11    | 1.101903682 | 0.000129277 |
| ENSG00000135090 | TAOK3    | 1.101915162 | 1.88E-05    |
| ENSG00000156504 | FAM122B  | 1.102024115 | 0.000213923 |
| ENSG00000146247 | PHIP     | 1.102035904 | 0.011801462 |
| ENSG00000173327 | MAP3K11  | 1.102061346 | 0.00067426  |
| ENSG00000124275 | MTRR     | 1.102064637 | 0.000116319 |
| ENSG00000155366 | RHOC     | 1.10232241  | 0.005857777 |
| ENSG00000166002 | SMCO4    | 1.102380038 | 0.00694588  |
| ENSG00000120685 | PROSER1  | 1.102445587 | 9.92E-06    |
| ENSG00000188342 | GTF2F2   | 1.102449566 | 0.000348823 |

|                 |           |             |             |
|-----------------|-----------|-------------|-------------|
| ENSG00000106477 | CEP41     | 1.102474674 | 2.89E-05    |
| ENSG00000120075 | HOXB5     | 1.102480319 | 3.22E-06    |
| ENSG00000147044 | CASK      | 1.102501436 | 0.009074489 |
| ENSG00000099377 | HSD3B7    | 1.102513547 | 2.24E-06    |
| ENSG00000117148 | ACTL8     | 1.102587192 | 0.008338488 |
| ENSG00000162849 | KIF26B    | 1.102605125 | 2.62E-06    |
| ENSG00000125812 | GZF1      | 1.102607774 | 0.000154285 |
| ENSG00000120699 | EXOSC8    | 1.102739579 | 3.53E-05    |
| ENSG00000180773 | SLC36A4   | 1.102827373 | 0.001300428 |
| ENSG00000112144 | ICK       | 1.10286861  | 0.011163819 |
| ENSG00000074696 | PTPLAD1   | 1.102953666 | 0.003353439 |
| ENSG00000163935 | SFMBT1    | 1.103174403 | 1.04E-05    |
| ENSG00000138095 | LRPPRC    | 1.103285513 | 0.021990893 |
| ENSG00000181315 | ZNF322    | 1.103285727 | 0.001610144 |
| ENSG00000177283 | FZD8      | 1.103304034 | 0.000308627 |
| ENSG00000111641 | NOP2      | 1.103316653 | 2.37E-06    |
| ENSG00000221968 | FADS3     | 1.103329812 | 3.57E-05    |
| ENSG00000173598 | NUDT4     | 1.103408918 | 1.62E-07    |
| ENSG00000197696 | NMB       | 1.103533763 | 0.000537053 |
| ENSG00000136870 | ZNF189    | 1.103581591 | 0.009034304 |
| ENSG00000139278 | GLIPR1    | 1.103600908 | 0.010887281 |
| ENSG00000116096 | SPR       | 1.103612143 | 0.000773868 |
| ENSG00000039139 | DNAH5     | 1.103642969 | 0.000553722 |
| ENSG00000174718 | KIAA1551  | 1.103694018 | 0.026619388 |
| ENSG00000110536 | PTPMT1    | 1.103754032 | 1.63E-06    |
| ENSG00000115419 | GLS       | 1.103803754 | 0.024911929 |
| ENSG00000160200 | CBS       | 1.103803995 | 0.000298321 |
| ENSG00000116586 | LAMTOR2   | 1.103824491 | 8.22E-08    |
| ENSG00000100162 | CENPM     | 1.103825085 | 0.009463985 |
| ENSG00000138207 | RBP4      | 1.103845522 | 0.001020927 |
| ENSG00000136982 | DSCC1     | 1.103849472 | 0.000135172 |
| ENSG00000109819 | PPARGC1A  | 1.103894373 | 0.000122021 |
| ENSG00000154553 | PDLIM3    | 1.104080139 | 0.038788422 |
| ENSG00000106105 | GARS      | 1.104090873 | 0.000517466 |
| ENSG00000107833 | NPM3      | 1.104120109 | 7.76E-05    |
| ENSG00000175197 | DDIT3     | 1.104147372 | 0.000462653 |
| ENSG00000109066 | TMEM104   | 1.104165829 | 4.77E-11    |
| ENSG00000198723 | C19orf45  | 1.10418095  | 0.000461152 |
| ENSG00000147874 | HAUS6     | 1.104204019 | 0.002361115 |
| ENSG00000023608 | SNAPC1    | 1.104264968 | 0.001517415 |
| ENSG00000160255 | ITGB2     | 1.104291631 | 0.046691395 |
| ENSG00000196730 | DAPK1     | 1.104293369 | 0.00022424  |
| ENSG00000141655 | TNFRSF11A | 1.104300465 | 0.042098004 |
| ENSG00000104856 | RELB      | 1.104343826 | 0.005666707 |
| ENSG00000180785 | OR51E1    | 1.104367834 | 0.003837022 |
| ENSG00000164038 | SLC9B2    | 1.104376501 | 0.02618492  |
| ENSG00000135913 | USP37     | 1.104383439 | 4.93E-05    |

|                 |         |             |             |
|-----------------|---------|-------------|-------------|
| ENSG00000149716 | ORAOV1  | 1.104411726 | 1.95E-05    |
| ENSG00000163660 | CCNL1   | 1.104412127 | 0.03015342  |
| ENSG00000101096 | NFATC2  | 1.104414238 | 1.28E-06    |
| ENSG00000003436 | TFPI    | 1.104447196 | 0.002892927 |
| ENSG00000115947 | ORC4    | 1.104458187 | 8.84E-05    |
| ENSG00000033011 | ALG1    | 1.104469168 | 0.006302269 |
| ENSG00000159899 | NPR2    | 1.104514559 | 3.60E-05    |
| ENSG00000013375 | PGM3    | 1.10452881  | 1.34E-05    |
| ENSG00000120526 | NUDCD1  | 1.104551731 | 1.30E-05    |
| ENSG00000162402 | USP24   | 1.104602743 | 1.12E-08    |
| ENSG00000146842 | TMEM209 | 1.104769485 | 1.06E-05    |
| ENSG00000168743 | NPNT    | 1.104837665 | 0.008036996 |
| ENSG00000103326 | CAPN15  | 1.104874446 | 0.000274115 |
| ENSG00000133328 | HRASLS2 | 1.104968753 | 0.01600005  |
| ENSG00000140993 | TIGD7   | 1.105013592 | 0.017585145 |
| ENSG00000180914 | OXTR    | 1.105027103 | 0.011763027 |
| ENSG00000183291 | 15-Sep  | 1.105068758 | 9.31E-08    |
| ENSG00000099834 | CDHR5   | 1.105086724 | 0.010628465 |
| ENSG00000213015 | ZNF580  | 1.105126628 | 0.000143248 |
| ENSG00000143198 | MGST3   | 1.10513405  | 2.00E-07    |
| ENSG00000134897 | BIVM    | 1.105181385 | 2.83E-05    |
| ENSG00000108848 | LUC7L3  | 1.105198434 | 0.037228421 |
| ENSG00000119522 | DENND1A | 1.105271877 | 0.049038392 |
| ENSG00000144815 | NXPE3   | 1.105281762 | 2.01E-05    |
| ENSG00000166482 | MFAP4   | 1.105349973 | 0.02487918  |
| ENSG00000171522 | PTGER4  | 1.105362803 | 0.021614605 |
| ENSG00000114439 | BBX     | 1.105381933 | 1.08E-07    |
| ENSG00000137161 | CNPY3   | 1.105395285 | 7.35E-05    |
| ENSG00000186281 | GPAT2   | 1.105401548 | 4.30E-05    |
| ENSG00000139323 | POC1B   | 1.105402538 | 1.20E-05    |
| ENSG00000171222 | SCAND1  | 1.105426968 | 3.74E-08    |
| ENSG00000205138 | SDHAF1  | 1.105435113 | 6.54E-09    |
| ENSG00000164220 | F2RL2   | 1.105488299 | 2.05E-07    |
| ENSG00000071859 | FAM50A  | 1.105540808 | 0.001399507 |
| ENSG00000140284 | SLC27A2 | 1.105594151 | 0.017399352 |
| ENSG00000183340 | JRKL    | 1.105639235 | 0.002802649 |
| ENSG00000198964 | SGMS1   | 1.10564166  | 0.001194289 |
| ENSG00000071537 | SEL1L   | 1.105689805 | 1.29E-05    |
| ENSG00000141198 | TOM1L1  | 1.105784256 | 0.001433322 |
| ENSG00000132646 | PCNA    | 1.10578583  | 0.005371382 |
| ENSG00000076650 | GPATCH1 | 1.105821741 | 5.22E-07    |
| ENSG00000102996 | MMP15   | 1.105844974 | 0.004304215 |
| ENSG00000103490 | PYCARD  | 1.105865692 | 3.98E-05    |
| ENSG00000088766 | CRLS1   | 1.105894309 | 1.02E-07    |
| ENSG00000146540 | C7orf50 | 1.105912515 | 1.66E-07    |
| ENSG00000182621 | PLCB1   | 1.1059325   | 3.18E-08    |
| ENSG00000204856 | FAM216A | 1.10596194  | 0.014206108 |

|                 |          |             |             |
|-----------------|----------|-------------|-------------|
| ENSG00000138385 | SSB      | 1.106015819 | 0.026256464 |
| ENSG00000137185 | ZSCAN9   | 1.106044886 | 3.72E-05    |
| ENSG00000133816 | MICAL2   | 1.10607418  | 5.47E-05    |
| ENSG00000122884 | P4HA1    | 1.106103964 | 0.005446091 |
| ENSG00000000460 | C1orf112 | 1.10612829  | 0.000572598 |
| ENSG00000160207 | HSF2BP   | 1.106157384 | 0.002483118 |
| ENSG00000170802 | FOXN2    | 1.106236221 | 1.90E-07    |
| ENSG00000122707 | RECK     | 1.106265234 | 0.02028188  |
| ENSG00000214029 | ZNF891   | 1.106276795 | 0.013961001 |
| ENSG00000149798 | CDC42EP2 | 1.1064454   | 1.08E-06    |
| ENSG00000162813 | BPNT1    | 1.106486213 | 2.77E-05    |
| ENSG00000118705 | RPN2     | 1.106490163 | 0.000719651 |
| ENSG00000128059 | PPAT     | 1.106493599 | 0.013929197 |
| ENSG00000197594 | ENPP1    | 1.106515344 | 9.77E-08    |
| ENSG00000160326 | SLC2A6   | 1.106518948 | 0.001048848 |
| ENSG00000134954 | ETS1     | 1.106560166 | 5.18E-05    |
| ENSG00000142634 | EFHD2    | 1.106564875 | 0.000453038 |
| ENSG00000172159 | FRMD3    | 1.106580288 | 0.000355917 |
| ENSG00000179526 | SHARPIN  | 1.106636547 | 3.74E-08    |
| ENSG00000089335 | ZNF302   | 1.106691198 | 0.008512439 |
| ENSG00000165914 | TTC7B    | 1.106776023 | 0.034202255 |
| ENSG00000239713 | APOBEC3G | 1.106791949 | 0.017360599 |
| ENSG00000130193 | THEM6    | 1.106861411 | 2.67E-05    |
| ENSG00000163611 | SPICE1   | 1.106933008 | 8.15E-06    |
| ENSG00000187098 | MITF     | 1.106998036 | 0.007085409 |
| ENSG00000155465 | SLC7A7   | 1.107042398 | 0.000537953 |
| ENSG00000148950 | IMMP1L   | 1.107072223 | 4.96E-05    |
| ENSG00000119922 | IFIT2    | 1.107097273 | 0.017587476 |
| ENSG00000105810 | CDK6     | 1.107137148 | 0.014438377 |
| ENSG00000078967 | UBE2D4   | 1.107139596 | 1.31E-07    |
| ENSG00000159184 | HOXB13   | 1.107143546 | 4.45E-06    |
| ENSG00000231925 | TAPBP    | 1.107152185 | 0.000505195 |
| ENSG00000145919 | BOD1     | 1.107161367 | 1.89E-07    |
| ENSG00000196646 | ZNF136   | 1.107171572 | 0.003068754 |
| ENSG00000157181 | C1orf27  | 1.107180217 | 8.11E-07    |
| ENSG00000171105 | INSR     | 1.107194059 | 0.002035016 |
| ENSG00000146250 | PRSS35   | 1.107208315 | 0.010134842 |
| ENSG00000125630 | POLR1B   | 1.107217598 | 1.85E-05    |
| ENSG00000152952 | PLOD2    | 1.107244599 | 0.026031684 |
| ENSG00000169016 | E2F6     | 1.107270137 | 1.33E-07    |
| ENSG00000070814 | TCOF1    | 1.107338151 | 6.19E-08    |
| ENSG00000136280 | CCM2     | 1.107353744 | 8.64E-07    |
| ENSG00000143614 | GATAD2B  | 1.107355892 | 1.38E-07    |
| ENSG00000168016 | TRANK1   | 1.107364745 | 0.001185308 |
| ENSG00000108064 | TFAM     | 1.107392468 | 3.39E-07    |
| ENSG00000128578 | STRIP2   | 1.107397604 | 0.002467397 |
| ENSG00000183722 | LHFP     | 1.107409166 | 0.001017558 |

|                 |              |             |             |
|-----------------|--------------|-------------|-------------|
| ENSG00000135847 | ACBD6        | 1.107465699 | 1.72E-06    |
| ENSG00000137814 | HAUS2        | 1.10761668  | 0.006341812 |
| ENSG00000111678 | C12orf57     | 1.10762515  | 2.80E-08    |
| ENSG00000138111 | TMEM180      | 1.107670212 | 7.63E-06    |
| ENSG00000088298 | EDEM2        | 1.10768543  | 0.000194656 |
| ENSG00000155016 | CYP2U1       | 1.107778211 | 0.00028096  |
| ENSG00000037897 | METTL1       | 1.107787062 | 3.45E-07    |
| ENSG00000164430 | MB21D1       | 1.107819178 | 1.11E-05    |
| ENSG00000079819 | EPB41L2      | 1.107834587 | 0.038610853 |
| ENSG00000130305 | NSUN5        | 1.107867167 | 0.008038772 |
| ENSG00000197959 | DNM3         | 1.107877183 | 0.0012625   |
| ENSG00000154240 | CEP112       | 1.107904607 | 0.005224965 |
| ENSG00000156966 | B3GNT7       | 1.107923474 | 6.56E-05    |
| ENSG00000172270 | BSG          | 1.107950658 | 4.43E-05    |
| ENSG00000173517 | PEAK1        | 1.108021654 | 3.72E-07    |
| ENSG00000129007 | CALML4       | 1.108049971 | 0.000137321 |
| ENSG00000117395 | EBNA1BP2     | 1.108052854 | 0.010665573 |
| ENSG00000106404 | CLDN15       | 1.108054348 | 0.011937092 |
| ENSG00000261740 | RP11-345J4.5 | 1.108082382 | 0.005446951 |
| ENSG00000164659 | KIAA1324L    | 1.108142096 | 0.016381291 |
| ENSG00000198168 | SVIP         | 1.10828627  | 2.64E-06    |
| ENSG00000116857 | TMEM9        | 1.108362349 | 5.74E-06    |
| ENSG00000112118 | MCM3         | 1.108396352 | 0.000666887 |
| ENSG00000124784 | RIOK1        | 1.108409611 | 0.000154759 |
| ENSG00000135899 | SP110        | 1.108439907 | 0.002241917 |
| ENSG00000100036 | SLC35E4      | 1.10846082  | 2.94E-06    |
| ENSG00000132122 | SPATA6       | 1.108571093 | 5.19E-05    |
| ENSG00000128791 | TWSG1        | 1.108637736 | 0.004301465 |
| ENSG00000198298 | ZNF485       | 1.108680836 | 0.009136605 |
| ENSG00000166508 | MCM7         | 1.108720631 | 0.001258138 |
| ENSG00000170085 | SIMC1        | 1.108731317 | 0.000220338 |
| ENSG00000175592 | FOSL1        | 1.10874213  | 0.004674011 |
| ENSG00000204764 | RANBP17      | 1.108764755 | 0.000283785 |
| ENSG00000124479 | NDP          | 1.108835447 | 0.001870021 |
| ENSG00000118004 | COLEC11      | 1.108896771 | 0.000216916 |
| ENSG00000093183 | SEC22C       | 1.108905968 | 7.49E-08    |
| ENSG00000112578 | BYSL         | 1.108940963 | 6.31E-06    |
| ENSG00000141577 | AZI1         | 1.108944483 | 4.02E-08    |
| ENSG00000198169 | ZNF251       | 1.108983817 | 5.24E-06    |
| ENSG00000180257 | ZNF816       | 1.108989556 | 1.69E-06    |
| ENSG00000159214 | CCDC24       | 1.109084858 | 6.14E-05    |
| ENSG00000102743 | SLC25A15     | 1.109098338 | 1.49E-06    |
| ENSG00000106344 | RBM28        | 1.109249988 | 0.001043377 |
| ENSG00000136104 | RNASEH2B     | 1.109251947 | 0.000303072 |
| ENSG00000203965 | EFCAB7       | 1.109279078 | 0.007455685 |
| ENSG00000134461 | ANKRD16      | 1.109303804 | 0.000456253 |
| ENSG00000076662 | ICAM3        | 1.109345335 | 0.014467977 |

|                 |            |             |             |
|-----------------|------------|-------------|-------------|
| ENSG00000181789 | COPG1      | 1.109392532 | 4.77E-05    |
| ENSG00000136717 | BIN1       | 1.109409191 | 0.002168239 |
| ENSG00000107554 | DNMBP      | 1.10941387  | 0.002431673 |
| ENSG00000184445 | KNTC1      | 1.109434368 | 0.003163247 |
| ENSG00000198945 | L3MBTL3    | 1.10945233  | 0.000766813 |
| ENSG00000171067 | C11orf24   | 1.109492063 | 0.00099616  |
| ENSG00000187513 | GJA4       | 1.109496597 | 6.15E-05    |
| ENSG00000070882 | OSBPL3     | 1.109515454 | 0.007035185 |
| ENSG00000007933 | FMO3       | 1.109523484 | 0.049870631 |
| ENSG00000206530 | WDR52      | 1.109524615 | 0.006467718 |
| ENSG00000268175 | AC117395.1 | 1.109652516 | 0.000955148 |
| ENSG00000165501 | LRR1       | 1.109779814 | 0.000202937 |
| ENSG00000090612 | ZNF268     | 1.109788375 | 0.011517775 |
| ENSG00000124103 | FAM209A    | 1.109806553 | 0.003803093 |
| ENSG00000173226 | IQCB1      | 1.109865372 | 1.16E-06    |
| ENSG00000117862 | TXNDC12    | 1.109866775 | 1.09E-09    |
| ENSG00000087116 | ADAMTS2    | 1.109875079 | 4.80E-08    |
| ENSG00000111679 | PTPN6      | 1.109936703 | 0.003329621 |
| ENSG00000154122 | ANKH       | 1.110048219 | 0.003485113 |
| ENSG00000115368 | WDR75      | 1.110057964 | 8.70E-07    |
| ENSG00000081052 | COL4A4     | 1.110073921 | 0.030308082 |
| ENSG00000174405 | LIG4       | 1.110161343 | 7.85E-05    |
| ENSG00000121848 | RNF115     | 1.110191391 | 5.65E-07    |
| ENSG00000105559 | PLEKHA4    | 1.11021443  | 1.47E-05    |
| ENSG00000141391 | SLMO1      | 1.110221465 | 0.004452636 |
| ENSG00000147679 | UTP23      | 1.110292963 | 7.42E-05    |
| ENSG00000149091 | DGKZ       | 1.110303932 | 0.007856715 |
| ENSG00000125247 | TMTC4      | 1.11031474  | 0.000134801 |
| ENSG00000047410 | TPR        | 1.110460502 | 7.52E-05    |
| ENSG00000178700 | DHFRL1     | 1.110511175 | 0.000431575 |
| ENSG00000108961 | RANGRF     | 1.110593969 | 9.04E-07    |
| ENSG00000149636 | DSN1       | 1.110683332 | 0.020351912 |
| ENSG00000137135 | ARHGEF39   | 1.110713447 | 0.000195627 |
| ENSG00000105643 | ARRDC2     | 1.110757283 | 3.96E-06    |
| ENSG00000112234 | FBXL4      | 1.110780513 | 0.00260898  |
| ENSG00000132356 | PRKAA1     | 1.110893092 | 8.99E-06    |
| ENSG00000162989 | KCNJ3      | 1.11102327  | 0.000123539 |
| ENSG00000178718 | RPP25      | 1.111028844 | 0.022305473 |
| ENSG00000173947 | PIFO       | 1.11109053  | 0.005877498 |
| ENSG00000198556 | ZNF789     | 1.111097476 | 0.000198314 |
| ENSG00000092607 | TBX15      | 1.111136862 | 0.000157187 |
| ENSG00000140105 | WARS       | 1.111200911 | 0.004128545 |
| ENSG00000117280 | RAB7L1     | 1.11120145  | 0.043215171 |
| ENSG00000167085 | PHB        | 1.111250954 | 0.00286015  |
| ENSG00000132386 | SERPINF1   | 1.111301744 | 0.021470801 |
| ENSG00000165392 | WRN        | 1.111328101 | 4.02E-05    |
| ENSG00000155792 | DEPTOR     | 1.111333192 | 0.002693085 |

|                 |            |             |             |
|-----------------|------------|-------------|-------------|
| ENSG00000134508 | CABLES1    | 1.111362084 | 0.000299594 |
| ENSG00000173889 | PHC3       | 1.111388541 | 1.49E-06    |
| ENSG00000042980 | ADAM28     | 1.111554593 | 0.044816701 |
| ENSG00000062822 | POLD1      | 1.111633891 | 0.000166382 |
| ENSG00000171724 | VAT1L      | 1.111704372 | 0.000248449 |
| ENSG00000126070 | AGO3       | 1.111766588 | 3.99E-07    |
| ENSG00000226479 | TMEM185B   | 1.1117831   | 0.008476323 |
| ENSG00000111674 | ENO2       | 1.111816173 | 0.018239994 |
| ENSG00000174177 | CTU2       | 1.111842403 | 1.24E-07    |
| ENSG00000138587 | MNS1       | 1.111854777 | 0.016227052 |
| ENSG00000241962 | C2orf15    | 1.111914859 | 8.26E-05    |
| ENSG00000186185 | KIF18B     | 1.111925402 | 0.000638334 |
| ENSG00000178057 | NDUFAF3    | 1.112006624 | 8.59E-07    |
| ENSG00000104432 | IL7        | 1.112075579 | 0.041642762 |
| ENSG00000145623 | OSMR       | 1.112191196 | 0.000823366 |
| ENSG00000187800 | PEAR1      | 1.112236495 | 5.95E-07    |
| ENSG00000125843 | AP5S1      | 1.112295334 | 5.37E-06    |
| ENSG00000038382 | TRIO       | 1.112327793 | 4.79E-07    |
| ENSG00000020577 | SAMD4A     | 1.112354777 | 0.017837901 |
| ENSG00000111554 | MDM1       | 1.112356384 | 0.011956216 |
| ENSG00000157399 | ARSE       | 1.112415141 | 0.010795503 |
| ENSG00000165943 | MOAP1      | 1.112490592 | 7.79E-10    |
| ENSG00000165923 | AGBL2      | 1.112504725 | 0.006151637 |
| ENSG00000197536 | C5orf56    | 1.112524483 | 0.000424922 |
| ENSG00000071246 | VASH1      | 1.112571229 | 0.025963615 |
| ENSG00000005075 | POLR2J     | 1.112642641 | 1.98E-07    |
| ENSG00000120328 | PCDHB12    | 1.11265475  | 0.023001329 |
| ENSG00000125870 | SNRPB2     | 1.112685655 | 0.003359931 |
| ENSG00000167840 | ZNF232     | 1.112700603 | 0.018633441 |
| ENSG00000118407 | FILIP1     | 1.112765598 | 9.43E-05    |
| ENSG00000169951 | ZNF764     | 1.112816154 | 0.007475296 |
| ENSG00000156162 | DPY19L4    | 1.112868084 | 0.047796001 |
| ENSG00000181982 | CCDC149    | 1.112880816 | 2.18E-05    |
| ENSG00000101577 | LPIN2      | 1.112889996 | 0.003684021 |
| ENSG00000137207 | YIPF3      | 1.112928404 | 8.17E-06    |
| ENSG00000139505 | MTMR6      | 1.112956842 | 0.000180608 |
| ENSG00000198794 | SCAMP5     | 1.113020966 | 1.15E-05    |
| ENSG00000198108 | CHSY3      | 1.113056393 | 0.000118622 |
| ENSG00000187051 | RPS19BP1   | 1.113092623 | 5.71E-08    |
| ENSG00000160710 | ADAR       | 1.113146159 | 3.84E-05    |
| ENSG00000248835 | AL357673.1 | 1.113147858 | 9.82E-06    |
| ENSG00000048052 | HDAC9      | 1.113230695 | 0.015924012 |
| ENSG00000147601 | TERF1      | 1.113246035 | 0.041147104 |
| ENSG00000172922 | RNASEH2C   | 1.11325497  | 1.22E-07    |
| ENSG00000189067 | LITAF      | 1.113373597 | 0.007301061 |
| ENSG00000179776 | CDH5       | 1.113446014 | 0.04613421  |
| ENSG00000129071 | MBD4       | 1.113447533 | 0.013696324 |

|                 |           |             |             |
|-----------------|-----------|-------------|-------------|
| ENSG00000075218 | GTSE1     | 1.113559631 | 0.006981768 |
| ENSG00000269404 | SPIB      | 1.11357981  | 0.017739934 |
| ENSG00000155254 | MARVELD1  | 1.113602947 | 2.40E-05    |
| ENSG00000168061 | SAC3D1    | 1.113661718 | 0.042507406 |
| ENSG00000141696 | LEPREL4   | 1.113680749 | 0.011746193 |
| ENSG00000111252 | SH2B3     | 1.113708593 | 0.001278624 |
| ENSG00000204428 | LY6G5C    | 1.113742499 | 0.000490663 |
| ENSG00000070087 | PFN2      | 1.113798275 | 0.003095952 |
| ENSG00000083635 | NUFIP1    | 1.113805801 | 3.75E-07    |
| ENSG00000123908 | AGO2      | 1.113858567 | 0.000765349 |
| ENSG00000163874 | ZC3H12A   | 1.113899579 | 0.009211141 |
| ENSG00000116675 | DNAJC6    | 1.11390088  | 2.37E-05    |
| ENSG00000163510 | CWC22     | 1.113910122 | 8.32E-06    |
| ENSG00000172590 | MRPL52    | 1.113943093 | 2.31E-08    |
| ENSG00000165632 | TAF3      | 1.113946304 | 2.59E-08    |
| ENSG00000067208 | EVI5      | 1.11400435  | 8.48E-07    |
| ENSG00000140323 | DISP2     | 1.114011357 | 0.005833808 |
| ENSG00000006327 | TNFRSF12A | 1.114022932 | 0.003098013 |
| ENSG00000075643 | MOCOS     | 1.11403631  | 0.026995909 |
| ENSG00000064199 | SPA17     | 1.114040694 | 0.002906614 |
| ENSG00000154310 | TNIK      | 1.114060248 | 0.00780616  |
| ENSG00000150656 | CNDP1     | 1.114188248 | 0.028820139 |
| ENSG00000085741 | WNT11     | 1.114210198 | 0.033109778 |
| ENSG00000133138 | TBC1D8B   | 1.114211373 | 0.025023658 |
| ENSG00000164379 | FOXQ1     | 1.114237355 | 3.06E-05    |
| ENSG00000166881 | TMEM194A  | 1.114282873 | 1.58E-05    |
| ENSG00000115568 | ZNF142    | 1.114294212 | 2.17E-09    |
| ENSG00000165304 | MELK      | 1.114349266 | 0.014692932 |
| ENSG00000147475 | ERLIN2    | 1.114356131 | 0.00588487  |
| ENSG00000120832 | MTERFD3   | 1.114431008 | 0.000352909 |
| ENSG00000180979 | LRRC57    | 1.114550051 | 7.43E-06    |
| ENSG00000133121 | STARD13   | 1.114568369 | 1.29E-06    |
| ENSG00000103264 | FBXO31    | 1.114604341 | 3.39E-06    |
| ENSG00000143195 | ILDR2     | 1.114865    | 1.10E-05    |
| ENSG00000177225 | PDDC1     | 1.114882265 | 2.29E-05    |
| ENSG00000113722 | CDX1      | 1.11490154  | 0.002846001 |
| ENSG00000101132 | PFDN4     | 1.114970343 | 2.68E-08    |
| ENSG00000173171 | MTX1      | 1.114999112 | 1.81E-06    |
| ENSG00000113504 | SLC12A7   | 1.115009541 | 0.000301516 |
| ENSG00000158163 | DZIP1L    | 1.115157897 | 0.000454677 |
| ENSG00000164114 | MAP9      | 1.115280797 | 0.004035215 |
| ENSG00000144485 | HES6      | 1.115283012 | 1.14E-08    |
| ENSG00000086300 | SNX10     | 1.115301519 | 0.000602036 |
| ENSG00000124228 | DDX27     | 1.115357776 | 0.00348952  |
| ENSG00000166927 | MS4A7     | 1.115398644 | 0.000410077 |
| ENSG00000178665 | ZNF713    | 1.11543889  | 0.029699305 |
| ENSG00000101773 | RBBP8     | 1.115565942 | 0.014279519 |

|                 |             |             |             |
|-----------------|-------------|-------------|-------------|
| ENSG00000182667 | NTM         | 1.115585124 | 0.004107048 |
| ENSG00000106823 | ECM2        | 1.115603013 | 5.84E-05    |
| ENSG00000057252 | SOAT1       | 1.115610445 | 0.001028    |
| ENSG00000185730 | ZNF696      | 1.1156719   | 2.25E-06    |
| ENSG00000147862 | NFIB        | 1.115691198 | 0.001056264 |
| ENSG00000159167 | STC1        | 1.115726739 | 0.002661905 |
| ENSG00000013364 | MVP         | 1.115730732 | 0.000760453 |
| ENSG00000148773 | MKI67       | 1.115794998 | 0.005482466 |
| ENSG00000072954 | TMEM38A     | 1.115838606 | 0.002316516 |
| ENSG00000166033 | HTRA1       | 1.115899296 | 0.013221981 |
| ENSG00000048649 | RSF1        | 1.115914035 | 2.64E-05    |
| ENSG00000031691 | CENPQ       | 1.115981912 | 0.002097746 |
| ENSG00000146521 | C6orf123    | 1.11604318  | 0.000734212 |
| ENSG00000180938 | ZNF572      | 1.116074851 | 0.028422324 |
| ENSG00000136144 | RCBTB1      | 1.116125695 | 1.16E-05    |
| ENSG00000127081 | ZNF484      | 1.116190957 | 2.54E-07    |
| ENSG00000118473 | SGIP1       | 1.116306362 | 0.001312585 |
| ENSG00000166797 | FAM96A      | 1.116333513 | 8.93E-12    |
| ENSG00000143554 | SLC27A3     | 1.116336587 | 0.001546556 |
| ENSG00000142959 | BEST4       | 1.116343491 | 0.017001847 |
| ENSG00000186283 | TOR3A       | 1.116405807 | 0.00195518  |
| ENSG00000119782 | FKBP1B      | 1.116426955 | 0.00327656  |
| ENSG00000139746 | RBM26       | 1.116503693 | 0.027696014 |
| ENSG00000016391 | CHDH        | 1.11650719  | 5.26E-07    |
| ENSG00000178381 | ZFAND2A     | 1.116531036 | 0.002923478 |
| ENSG00000153558 | FBXL2       | 1.11659228  | 0.000403984 |
| ENSG00000123131 | PRDX4       | 1.116598136 | 1.32E-08    |
| ENSG00000095739 | BAMBI       | 1.116636526 | 0.010577213 |
| ENSG00000141741 | MIEN1       | 1.116658064 | 0.000600678 |
| ENSG00000102678 | FGF9        | 1.116736176 | 0.028303984 |
| ENSG00000213020 | ZNF611      | 1.116838956 | 0.011321622 |
| ENSG00000158427 | TMSB15B     | 1.11686687  | 0.002176609 |
| ENSG00000168067 | MAP4K2      | 1.116897764 | 6.46E-05    |
| ENSG00000162430 | SEPN1       | 1.116915965 | 2.05E-11    |
| ENSG00000105928 | DFNA5       | 1.116976383 | 0.020120961 |
| ENSG00000160179 | ABCG1       | 1.116984481 | 0.000383273 |
| ENSG00000170965 | PLAC1       | 1.116990027 | 0.02953139  |
| ENSG00000114784 | EIF1B       | 1.117067718 | 2.42E-10    |
| ENSG00000205189 | ZBTB10      | 1.117097278 | 0.001000489 |
| ENSG00000253251 | CTC-534A2.2 | 1.117098574 | 0.004080028 |
| ENSG00000170276 | HSPB2       | 1.117110043 | 0.004671648 |
| ENSG00000154237 | LRRK1       | 1.117134017 | 7.76E-06    |
| ENSG00000136240 | KDEL2       | 1.117264936 | 1.16E-05    |
| ENSG00000143401 | ANP32E      | 1.117292798 | 0.009240446 |
| ENSG00000204525 | HLA-C       | 1.117303197 | 1.50E-05    |
| ENSG00000138190 | EXOC6       | 1.117327241 | 1.44E-08    |
| ENSG00000117594 | HSD11B1     | 1.117355408 | 0.000593628 |

|                 |           |             |             |
|-----------------|-----------|-------------|-------------|
| ENSG00000155256 | ZFYVE27   | 1.117393197 | 8.80E-09    |
| ENSG00000102763 | VWA8      | 1.117398903 | 0.000104908 |
| ENSG00000165801 | ARHGEF40  | 1.11741387  | 1.35E-05    |
| ENSG00000084636 | COL16A1   | 1.117417977 | 0.001768048 |
| ENSG00000176788 | BASP1     | 1.117475848 | 0.012129432 |
| ENSG00000109113 | RAB34     | 1.117550059 | 0.000190505 |
| ENSG00000089472 | HEPH      | 1.117596566 | 0.025763123 |
| ENSG00000177432 | NAP1L5    | 1.117631315 | 0.012035531 |
| ENSG00000131773 | KHDRBS3   | 1.117639222 | 0.009523354 |
| ENSG00000175711 | B3GNTL1   | 1.117659111 | 1.44E-05    |
| ENSG00000128242 | GAL3ST1   | 1.1177045   | 1.52E-05    |
| ENSG00000121864 | ZNF639    | 1.117715883 | 0.000182128 |
| ENSG00000152422 | XRCC4     | 1.117746065 | 0.007039162 |
| ENSG00000184428 | TOP1MT    | 1.117821565 | 9.22E-06    |
| ENSG00000107159 | CA9       | 1.11784348  | 0.028339666 |
| ENSG00000169116 | PARM1     | 1.117850696 | 0.007001666 |
| ENSG00000196660 | SLC30A10  | 1.117898444 | 0.003071579 |
| ENSG00000005801 | ZNF195    | 1.117919194 | 0.01328335  |
| ENSG00000142856 | ITGB3BP   | 1.117962874 | 5.76E-05    |
| ENSG00000167625 | ZNF526    | 1.118124976 | 1.10E-05    |
| ENSG00000173530 | TNFRSF10D | 1.11814659  | 8.30E-08    |
| ENSG00000118193 | KIF14     | 1.118146673 | 0.003866573 |
| ENSG00000135541 | AHI1      | 1.118166056 | 1.00E-06    |
| ENSG00000145431 | PDGFC     | 1.118218743 | 2.45E-05    |
| ENSG00000087157 | PGS1      | 1.118236873 | 7.65E-08    |
| ENSG00000204287 | HLA-DRA   | 1.118267999 | 0.007495283 |
| ENSG00000116641 | DOCK7     | 1.118357977 | 5.24E-06    |
| ENSG00000185803 | SLC52A2   | 1.118366456 | 0.001218431 |
| ENSG00000147669 | POLR2K    | 1.118428573 | 1.25E-08    |
| ENSG00000135047 | CTSL      | 1.118458359 | 0.013157633 |
| ENSG00000152990 | GPR125    | 1.118491841 | 2.61E-08    |
| ENSG00000089195 | TRMT6     | 1.118514968 | 6.01E-06    |
| ENSG00000070961 | ATP2B1    | 1.118540478 | 0.029213042 |
| ENSG00000135185 | TMEM243   | 1.11856777  | 0.004808123 |
| ENSG00000142227 | EMP3      | 1.118644742 | 0.011789764 |
| ENSG00000163507 | KIAA1524  | 1.118648133 | 0.002537748 |
| ENSG00000174928 | C3orf33   | 1.118649158 | 4.59E-06    |
| ENSG00000175029 | CTBP2     | 1.118652415 | 0.001478395 |
| ENSG00000106080 | FKBP14    | 1.118713985 | 3.30E-07    |
| ENSG00000165983 | PTER      | 1.118727717 | 1.32E-06    |
| ENSG00000112183 | RBM24     | 1.118778339 | 0.002029232 |
| ENSG00000139826 | ABHD13    | 1.118781756 | 0.000581924 |
| ENSG00000120694 | HSPH1     | 1.118859171 | 3.02E-05    |
| ENSG00000166598 | HSP90B1   | 1.118888478 | 0.006114263 |
| ENSG00000118217 | ATF6      | 1.118897933 | 1.35E-08    |
| ENSG00000140280 | LYSMD2    | 1.119005868 | 3.34E-05    |
| ENSG00000151657 | KIN       | 1.119093358 | 0.000713864 |

|                 |            |             |             |
|-----------------|------------|-------------|-------------|
| ENSG00000164104 | HMGB2      | 1.119096549 | 0.040837581 |
| ENSG00000143106 | PSMA5      | 1.119114632 | 2.75E-08    |
| ENSG00000177951 | BET1L      | 1.119159836 | 1.92E-07    |
| ENSG00000113296 | THBS4      | 1.119184169 | 0.010747827 |
| ENSG00000177706 | FAM20C     | 1.119223284 | 0.001637601 |
| ENSG00000169919 | GUSB       | 1.119223531 | 0.000979878 |
| ENSG00000139998 | RAB15      | 1.119247527 | 0.007904311 |
| ENSG00000178343 | SHISA3     | 1.119279644 | 0.009535552 |
| ENSG00000162415 | ZSWIM5     | 1.119368023 | 0.001147064 |
| ENSG00000140853 | NLRC5      | 1.119387663 | 0.002623438 |
| ENSG00000108551 | RASD1      | 1.119404018 | 0.000618956 |
| ENSG00000148737 | TCF7L2     | 1.119412142 | 0.002308004 |
| ENSG00000142892 | PIGK       | 1.119450736 | 0.018482665 |
| ENSG00000013810 | TACC3      | 1.119456826 | 0.01981819  |
| ENSG00000131669 | NINJ1      | 1.119525544 | 5.55E-07    |
| ENSG00000162775 | RBM15      | 1.119537042 | 0.001113045 |
| ENSG00000174807 | CD248      | 1.119554307 | 7.14E-08    |
| ENSG00000184005 | ST6GALNAC3 | 1.119582819 | 0.028770641 |
| ENSG00000196387 | ZNF140     | 1.119641508 | 0.002831054 |
| ENSG00000100911 | PSME2      | 1.119685793 | 0.00073565  |
| ENSG00000152620 | NADK2      | 1.119750002 | 0.000481311 |
| ENSG00000172602 | RND1       | 1.119757647 | 0.004377198 |
| ENSG00000111196 | MAGOHB     | 1.119825756 | 0.000211866 |
| ENSG00000112701 | SENP6      | 1.119928887 | 2.48E-06    |
| ENSG00000173402 | DAG1       | 1.119954103 | 3.92E-08    |
| ENSG00000184785 | SMIM10     | 1.119957811 | 0.001021323 |
| ENSG00000138035 | PNPT1      | 1.119994967 | 9.70E-06    |
| ENSG00000250317 | SMIM20     | 1.120084049 | 1.82E-08    |
| ENSG00000182492 | BGN        | 1.120093334 | 0.00717902  |
| ENSG00000164330 | EBF1       | 1.120106601 | 0.000974206 |
| ENSG00000112699 | GMDS       | 1.12015707  | 0.03019351  |
| ENSG00000178074 | C2orf69    | 1.120170281 | 1.16E-05    |
| ENSG00000186376 | ZNF75D     | 1.120174058 | 3.40E-05    |
| ENSG00000169245 | CXCL10     | 1.120404625 | 0.035314043 |
| ENSG00000135114 | OASL       | 1.120434827 | 0.003883655 |
| ENSG00000131848 | ZSCAN5A    | 1.12055641  | 0.000789086 |
| ENSG00000068366 | ACSL4      | 1.120576273 | 0.008362385 |
| ENSG00000106355 | LSM5       | 1.12068718  | 0.003495131 |
| ENSG00000189042 | ZNF567     | 1.120783252 | 0.000404245 |
| ENSG00000153207 | AHCTF1     | 1.120812775 | 1.09E-08    |
| ENSG00000196547 | MAN2A2     | 1.12087917  | 9.73E-05    |
| ENSG00000162545 | CAMK2N1    | 1.120918313 | 0.004189728 |
| ENSG00000196526 | AFAP1      | 1.120983135 | 0.012421259 |
| ENSG00000151090 | THRB       | 1.120990466 | 0.003319737 |
| ENSG00000125912 | NCLN       | 1.121043829 | 0.002759734 |
| ENSG00000107242 | PIP5K1B    | 1.121118985 | 0.00117589  |
| ENSG00000134697 | GNL2       | 1.121161116 | 1.53E-07    |

|                 |          |             |             |
|-----------------|----------|-------------|-------------|
| ENSG00000101670 | LIPG     | 1.121168433 | 0.018021844 |
| ENSG00000104081 | BMF      | 1.1212133   | 0.000843771 |
| ENSG00000178538 | CA8      | 1.12123496  | 5.15E-05    |
| ENSG00000107815 | C10orf2  | 1.121370524 | 4.27E-06    |
| ENSG00000240583 | AQP1     | 1.121391839 | 0.005289299 |
| ENSG00000166734 | CASC4    | 1.121445435 | 1.83E-09    |
| ENSG00000181026 | AEN      | 1.121472502 | 2.92E-08    |
| ENSG00000170955 | PRKCDBP  | 1.121500991 | 3.42E-06    |
| ENSG00000116761 | CTH      | 1.121550263 | 0.032524007 |
| ENSG00000136213 | CHST12   | 1.121582265 | 8.92E-06    |
| ENSG00000198393 | ZNF26    | 1.121617153 | 1.36E-06    |
| ENSG00000197345 | MRPL21   | 1.121644243 | 0.00080736  |
| ENSG00000154380 | ENAH     | 1.121662201 | 1.35E-06    |
| ENSG00000104518 | GSDMD    | 1.121699043 | 0.001430552 |
| ENSG00000181038 | METTL23  | 1.121704952 | 1.13E-09    |
| ENSG00000187867 | PALM3    | 1.121758926 | 0.031703944 |
| ENSG00000160959 | LRRC14   | 1.121767766 | 1.14E-07    |
| ENSG00000135535 | CD164    | 1.121799985 | 0.034213256 |
| ENSG00000169508 | GPR183   | 1.121863979 | 0.022650774 |
| ENSG00000159459 | UBR1     | 1.121955851 | 9.84E-08    |
| ENSG00000101911 | PRPS2    | 1.122148317 | 0.005778963 |
| ENSG00000137478 | FCHSD2   | 1.122168254 | 0.000107298 |
| ENSG00000198523 | PLN      | 1.12218046  | 0.041322346 |
| ENSG00000151881 | C5orf28  | 1.122274457 | 0.043038498 |
| ENSG00000185238 | PRMT3    | 1.122325201 | 6.59E-05    |
| ENSG00000219438 | FAM19A5  | 1.122326501 | 7.38E-06    |
| ENSG00000141753 | IGFBP4   | 1.122353635 | 0.031661567 |
| ENSG00000100665 | SERPINA4 | 1.12237736  | 0.002638577 |
| ENSG00000186088 | GSAP     | 1.12240232  | 0.027789844 |
| ENSG00000257727 | CNPY2    | 1.122503502 | 0.000382744 |
| ENSG00000132763 | MMACHC   | 1.122640706 | 2.89E-06    |
| ENSG00000171365 | CLCN5    | 1.122643128 | 2.79E-05    |
| ENSG00000117676 | RPS6KA1  | 1.122695026 | 0.004112199 |
| ENSG00000187678 | SPRY4    | 1.122815311 | 0.000370223 |
| ENSG00000101846 | STS      | 1.122822968 | 0.00564347  |
| ENSG00000100558 | PLEK2    | 1.122917928 | 0.001138167 |
| ENSG00000169242 | EFNA1    | 1.123000779 | 0.002357464 |
| ENSG00000150401 | DCUN1D2  | 1.123052217 | 3.96E-06    |
| ENSG00000118762 | PKD2     | 1.123103457 | 0.003771585 |
| ENSG00000135722 | FBXL8    | 1.123115612 | 0.005089646 |
| ENSG00000110330 | BIRC2    | 1.123197806 | 0.01886255  |
| ENSG00000100625 | SIX4     | 1.123280144 | 4.89E-09    |
| ENSG00000101470 | TNNC2    | 1.12329053  | 3.01E-05    |
| ENSG00000112787 | FBRSL1   | 1.123430969 | 1.97E-09    |
| ENSG00000181754 | AMIGO1   | 1.123446252 | 4.42E-06    |
| ENSG00000197555 | SIPA1L1  | 1.12353142  | 7.50E-06    |
| ENSG00000116580 | GON4L    | 1.123542358 | 8.25E-09    |

|                 |          |             |             |
|-----------------|----------|-------------|-------------|
| ENSG00000139192 | TAPBPL   | 1.123571385 | 0.013332454 |
| ENSG00000138758 | 11-Sep   | 1.123628999 | 1.78E-09    |
| ENSG00000167191 | GPRC5B   | 1.123631643 | 0.011308193 |
| ENSG00000108854 | SMURF2   | 1.123686626 | 0.03497427  |
| ENSG00000181472 | ZBTB2    | 1.123709446 | 1.73E-05    |
| ENSG00000104728 | ARHGEF10 | 1.123732719 | 0.00286485  |
| ENSG00000105854 | PON2     | 1.123786285 | 0.008762735 |
| ENSG00000253797 | UTP14C   | 1.1238208   | 1.28E-08    |
| ENSG00000125850 | OVOL2    | 1.123845757 | 2.65E-05    |
| ENSG00000076003 | MCM6     | 1.12387251  | 0.000128004 |
| ENSG00000197162 | ZNF785   | 1.123970109 | 2.77E-05    |
| ENSG00000131943 | C19orf12 | 1.124013363 | 0.000866138 |
| ENSG00000197279 | ZNF165   | 1.124051274 | 0.049470984 |
| ENSG00000105989 | WNT2     | 1.124099164 | 0.000138447 |
| ENSG00000171135 | JAGN1    | 1.124113544 | 3.48E-11    |
| ENSG00000157765 | SLC34A2  | 1.124155936 | 0.00331329  |
| ENSG00000125810 | CD93     | 1.124166851 | 0.008172197 |
| ENSG00000026025 | VIM      | 1.124167528 | 0.001776537 |
| ENSG00000176022 | B3GALT6  | 1.124228665 | 7.75E-09    |
| ENSG00000079150 | FKBP7    | 1.124232961 | 5.50E-07    |
| ENSG00000132680 | KIAA0907 | 1.124258067 | 0.010463116 |
| ENSG00000255150 | EID3     | 1.124300918 | 0.001231088 |
| ENSG00000101057 | MYBL2    | 1.124369796 | 0.013186832 |
| ENSG00000119703 | ZC2HC1C  | 1.124558551 | 3.99E-05    |
| ENSG00000106009 | BRAT1    | 1.124568281 | 2.21E-06    |
| ENSG00000168961 | LGALS9   | 1.124594599 | 0.000334938 |
| ENSG00000101474 | APMAP    | 1.124714074 | 0.000474326 |
| ENSG00000167618 | LAIR2    | 1.124928022 | 0.000841206 |
| ENSG00000138434 | SSFA2    | 1.124943277 | 0.007232885 |
| ENSG00000139540 | SLC39A5  | 1.1249611   | 3.10E-05    |
| ENSG00000146276 | GABRR1   | 1.12500361  | 0.026070584 |
| ENSG00000143786 | CNIH3    | 1.125023652 | 2.06E-05    |
| ENSG00000178033 | FAM26E   | 1.12505456  | 0.002232564 |
| ENSG00000104998 | IL27RA   | 1.125067999 | 0.000838536 |
| ENSG00000154813 | DPH3     | 1.125072866 | 1.31E-05    |
| ENSG00000091127 | PUS7     | 1.12517969  | 0.02540104  |
| ENSG00000153071 | DAB2     | 1.125225984 | 0.012138719 |
| ENSG00000157150 | TIMP4    | 1.125280233 | 0.003131719 |
| ENSG00000104205 | SGK3     | 1.125292453 | 6.37E-08    |
| ENSG00000162458 | FBLIM1   | 1.125311724 | 7.11E-06    |
| ENSG00000138363 | ATIC     | 1.125312427 | 0.00031186  |
| ENSG00000184163 | FAM132A  | 1.125322715 | 0.000820589 |
| ENSG00000157259 | GATAD1   | 1.125337563 | 0.001789377 |
| ENSG00000164879 | CA3      | 1.125339484 | 0.000132439 |
| ENSG00000185885 | IFITM1   | 1.125340181 | 0.022109305 |
| ENSG00000143158 | MPC2     | 1.125449997 | 6.76E-06    |
| ENSG00000147649 | MTDH     | 1.125459592 | 0.025832124 |

|                 |          |             |             |
|-----------------|----------|-------------|-------------|
| ENSG00000169851 | PCDH7    | 1.12549595  | 0.012150501 |
| ENSG00000085491 | SLC25A24 | 1.125502988 | 0.047296259 |
| ENSG00000151490 | PTPRO    | 1.125505922 | 0.049296867 |
| ENSG00000142185 | TRPM2    | 1.125507004 | 7.50E-08    |
| ENSG00000108679 | LGALS3BP | 1.125509391 | 0.00015186  |
| ENSG00000100290 | BIK      | 1.125513534 | 2.14E-05    |
| ENSG00000067533 | RRP15    | 1.125536086 | 2.41E-05    |
| ENSG00000177426 | TGIF1    | 1.125598163 | 0.00139734  |
| ENSG00000205208 | C4orf46  | 1.125599839 | 0.001964675 |
| ENSG00000136603 | SKIL     | 1.125601621 | 0.000115913 |
| ENSG00000165233 | C9orf89  | 1.125724584 | 5.58E-11    |
| ENSG00000071462 | WBSCR22  | 1.125913602 | 0.000671241 |
| ENSG00000127838 | PNKD     | 1.125942092 | 1.73E-09    |
| ENSG00000172935 | MRGPRF   | 1.125994187 | 0.014375941 |
| ENSG00000116830 | TTF2     | 1.126174008 | 0.000268281 |
| ENSG00000135931 | ARMC9    | 1.126207265 | 3.34E-07    |
| ENSG00000027697 | IFNGR1   | 1.126229777 | 0.022322718 |
| ENSG00000153487 | ING1     | 1.12630682  | 4.81E-08    |
| ENSG00000172292 | CERS6    | 1.126478754 | 1.09E-05    |
| ENSG00000198829 | SUCNR1   | 1.12655805  | 0.010342168 |
| ENSG00000137364 | TPMT     | 1.12662674  | 4.31E-06    |
| ENSG00000085760 | MTIF2    | 1.126630307 | 0.029180424 |
| ENSG00000143248 | RGS5     | 1.12664746  | 0.025652202 |
| ENSG00000126456 | IRF3     | 1.126767315 | 0.000172297 |
| ENSG00000111665 | CDCA3    | 1.126844029 | 4.09E-05    |
| ENSG00000197496 | SLC2A10  | 1.126926161 | 0.015429935 |
| ENSG00000113638 | TTC33    | 1.126980746 | 0.000361983 |
| ENSG00000164574 | GALNT10  | 1.126982578 | 0.004405556 |
| ENSG00000177868 | CCDC23   | 1.127044208 | 3.05E-06    |
| ENSG00000197586 | ENTPD6   | 1.127063984 | 0.000737036 |
| ENSG00000160191 | PDE9A    | 1.127080141 | 0.002078458 |
| ENSG00000130958 | SLC35D2  | 1.127188277 | 0.001254572 |
| ENSG00000107819 | SFXN3    | 1.127231482 | 0.000418425 |
| ENSG00000119630 | PGF      | 1.127267307 | 0.000748518 |
| ENSG00000054690 | PLEKHH1  | 1.127317249 | 2.83E-05    |
| ENSG00000114378 | HYAL1    | 1.12732251  | 0.043909565 |
| ENSG00000064651 | SLC12A2  | 1.127355785 | 0.017840685 |
| ENSG00000175899 | A2M      | 1.127366226 | 0.027351912 |
| ENSG00000122952 | ZWINT    | 1.127381966 | 0.036973577 |
| ENSG00000143924 | EML4     | 1.12745841  | 9.88E-11    |
| ENSG00000204128 | C2orf72  | 1.127461346 | 2.80E-06    |
| ENSG00000141446 | ESCO1    | 1.127501705 | 1.77E-06    |
| ENSG00000158714 | SLAMF8   | 1.127545489 | 0.021208728 |
| ENSG00000071539 | TRIP13   | 1.127551371 | 0.001630961 |
| ENSG00000221869 | CEBPD    | 1.127557886 | 9.53E-07    |
| ENSG00000064703 | DDX20    | 1.127558485 | 5.95E-06    |
| ENSG00000121749 | TBC1D15  | 1.127570085 | 0.028972707 |

|                 |          |             |             |
|-----------------|----------|-------------|-------------|
| ENSG00000115946 | PNO1     | 1.127650136 | 2.26E-06    |
| ENSG00000181649 | PHLDA2   | 1.127674436 | 3.84E-05    |
| ENSG00000163501 | IHH      | 1.127679433 | 0.000132249 |
| ENSG00000106392 | C1GALT1  | 1.127710191 | 0.012269351 |
| ENSG00000177192 | PUS1     | 1.1277358   | 1.17E-06    |
| ENSG00000242802 | AP5Z1    | 1.127744204 | 0.019848082 |
| ENSG00000117122 | MFAP2    | 1.12778106  | 0.016515777 |
| ENSG00000061918 | GUCY1B3  | 1.127791367 | 0.000267412 |
| ENSG00000148297 | MED22    | 1.127805379 | 1.45E-06    |
| ENSG00000134901 | KDELC1   | 1.127822003 | 3.39E-06    |
| ENSG00000111863 | ADTRP    | 1.127845903 | 0.003469481 |
| ENSG00000180855 | ZNF443   | 1.127879195 | 0.006165016 |
| ENSG00000149531 | FRG1B    | 1.127883771 | 0.001343058 |
| ENSG00000163463 | KRTCAP2  | 1.127884359 | 6.57E-17    |
| ENSG00000123136 | DDX39A   | 1.127890343 | 0.002210699 |
| ENSG00000106524 | ANKMY2   | 1.127940564 | 0.011545704 |
| ENSG00000050165 | DKK3     | 1.128100717 | 0.00240651  |
| ENSG00000163512 | AZI2     | 1.128107138 | 7.96E-06    |
| ENSG00000147642 | SYBU     | 1.128214654 | 0.031299095 |
| ENSG00000112473 | SLC39A7  | 1.128278004 | 0.000120473 |
| ENSG00000184451 | CCR10    | 1.128321331 | 0.001807386 |
| ENSG00000072571 | HMMR     | 1.12833278  | 0.016520709 |
| ENSG00000159403 | C1R      | 1.128453505 | 0.028587816 |
| ENSG00000163513 | TGFBR2   | 1.128541917 | 1.64E-05    |
| ENSG00000125798 | FOXA2    | 1.128701703 | 0.000755506 |
| ENSG00000163762 | TM4SF18  | 1.128709678 | 0.006502582 |
| ENSG00000147654 | EBAG9    | 1.128748946 | 4.10E-08    |
| ENSG00000196569 | LAMA2    | 1.128820051 | 0.000116063 |
| ENSG00000132781 | MUTYH    | 1.128827485 | 1.95E-10    |
| ENSG00000101457 | DNTTIP1  | 1.128861955 | 4.98E-07    |
| ENSG00000088448 | ANKRD10  | 1.128917433 | 0.008177905 |
| ENSG00000204642 | HLA-F    | 1.128919893 | 0.000172345 |
| ENSG00000103811 | CTSH     | 1.128925789 | 0.002967572 |
| ENSG00000129028 | THAP10   | 1.128963672 | 0.000116802 |
| ENSG00000085721 | RRN3     | 1.128977992 | 1.37E-05    |
| ENSG00000198205 | ZXDA     | 1.129020371 | 6.85E-05    |
| ENSG00000144647 | POMGNT2  | 1.12904183  | 5.60E-05    |
| ENSG00000123095 | BHLHE41  | 1.129046385 | 0.001102164 |
| ENSG00000154040 | CABYR    | 1.129164937 | 0.018333136 |
| ENSG00000089327 | FXD5     | 1.129236004 | 0.000110956 |
| ENSG00000102977 | ACD      | 1.129285745 | 9.13E-08    |
| ENSG00000073849 | ST6GAL1  | 1.129291792 | 4.00E-08    |
| ENSG00000112561 | TFEB     | 1.129315225 | 5.37E-08    |
| ENSG00000204564 | C6orf136 | 1.129373855 | 4.74E-06    |
| ENSG00000180353 | HCLS1    | 1.129476533 | 0.022113755 |
| ENSG00000179761 | PIPOX    | 1.129499126 | 0.012455906 |
| ENSG00000110717 | NDUFS8   | 1.129502791 | 7.05E-05    |

|                 |         |             |             |
|-----------------|---------|-------------|-------------|
| ENSG00000120253 | NUP43   | 1.129511855 | 0.013551962 |
| ENSG00000136193 | SCRN1   | 1.129544427 | 0.030350118 |
| ENSG00000102034 | ELF4    | 1.129553343 | 0.000500992 |
| ENSG00000197147 | LRRC8B  | 1.129584763 | 9.73E-08    |
| ENSG00000162998 | FRZB    | 1.1297701   | 0.002464761 |
| ENSG00000116095 | PLEKHA3 | 1.129811396 | 1.69E-11    |
| ENSG00000182141 | ZNF708  | 1.129844078 | 0.000349205 |
| ENSG00000121152 | NCAPH   | 1.129906762 | 0.000191686 |
| ENSG00000131043 | AAR2    | 1.130234145 | 3.86E-13    |
| ENSG00000203791 | METTL10 | 1.130268663 | 0.000185239 |
| ENSG00000162511 | LAPTM5  | 1.130297573 | 0.017302112 |
| ENSG00000131791 | PRKAB2  | 1.130337336 | 1.51E-07    |
| ENSG00000161921 | CXCL16  | 1.130407016 | 7.43E-06    |
| ENSG00000115756 | HPCAL1  | 1.130464204 | 0.001167855 |
| ENSG00000155093 | PTPRN2  | 1.13046718  | 0.001253823 |
| ENSG00000152767 | FARP1   | 1.130489288 | 0.003243888 |
| ENSG00000108511 | HOXB6   | 1.130590075 | 0.027698698 |
| ENSG00000164251 | F2RL1   | 1.130622561 | 4.28E-06    |
| ENSG00000161281 | COX7A1  | 1.130641818 | 1.21E-05    |
| ENSG00000109861 | CTSC    | 1.130707147 | 0.023257743 |
| ENSG00000149485 | FADS1   | 1.130775894 | 0.002405284 |
| ENSG00000148840 | PPRC1   | 1.130799349 | 2.36E-07    |
| ENSG00000129538 | RNASE1  | 1.13082471  | 0.026890192 |
| ENSG00000157064 | NMNAT2  | 1.130997583 | 0.006281981 |
| ENSG00000071575 | TRIB2   | 1.131105086 | 0.003452481 |
| ENSG00000185201 | IFITM2  | 1.131246913 | 0.008082115 |
| ENSG00000196214 | ZNF766  | 1.131283223 | 8.73E-08    |
| ENSG00000148516 | ZEB1    | 1.131346406 | 2.66E-06    |
| ENSG00000162482 | AKR7A3  | 1.131376936 | 0.009292254 |
| ENSG00000160447 | PKN3    | 1.131404577 | 2.50E-07    |
| ENSG00000104219 | ZDHHC2  | 1.131478825 | 0.013462751 |
| ENSG00000055044 | NOP58   | 1.131611236 | 2.92E-11    |
| ENSG00000101955 | SRPX    | 1.131641647 | 0.039133829 |
| ENSG00000240204 | SMKR1   | 1.131747353 | 0.00178214  |
| ENSG00000081377 | CDC14B  | 1.131960632 | 0.000887731 |
| ENSG00000115267 | IFIH1   | 1.132059755 | 0.041138611 |
| ENSG00000203907 | OOEP    | 1.132184355 | 0.026284698 |
| ENSG00000171456 | ASXL1   | 1.132300688 | 1.22E-14    |
| ENSG00000198901 | PRC1    | 1.132318175 | 0.014091297 |
| ENSG00000010292 | NCAPD2  | 1.132398822 | 4.89E-05    |
| ENSG00000145012 | LPP     | 1.132446301 | 1.91E-09    |
| ENSG00000181019 | NQO1    | 1.132527834 | 1.49E-05    |
| ENSG00000170962 | PDGFD   | 1.132551107 | 0.038237627 |
| ENSG00000196639 | HRH1    | 1.132571241 | 8.88E-05    |
| ENSG00000120162 | MOB3B   | 1.132641536 | 9.82E-05    |
| ENSG00000149948 | HMGA2   | 1.132647279 | 0.015127023 |
| ENSG00000138028 | CGREF1  | 1.132669385 | 0.002029534 |

|                 |           |             |             |
|-----------------|-----------|-------------|-------------|
| ENSG00000146731 | CCT6A     | 1.132688567 | 0.004432411 |
| ENSG00000162636 | FAM102B   | 1.132787984 | 9.55E-10    |
| ENSG00000162851 | TFB2M     | 1.132812073 | 1.77E-06    |
| ENSG00000164414 | SLC35A1   | 1.132849493 | 0.010621311 |
| ENSG00000173621 | LRFN4     | 1.132999699 | 3.17E-07    |
| ENSG00000188404 | SELL      | 1.133063059 | 0.02938128  |
| ENSG00000168916 | ZNF608    | 1.133103666 | 0.000423872 |
| ENSG00000105866 | SP4       | 1.133136003 | 9.92E-10    |
| ENSG00000019582 | CD74      | 1.133141275 | 0.002128027 |
| ENSG00000178752 | FAM132B   | 1.133155783 | 0.000835466 |
| ENSG00000184060 | ADAP2     | 1.13317972  | 0.000710358 |
| ENSG00000197405 | C5AR1     | 1.133191815 | 0.003705589 |
| ENSG00000186310 | NAP1L3    | 1.133246496 | 0.004746867 |
| ENSG00000173166 | RAPH1     | 1.133475774 | 1.83E-06    |
| ENSG00000196159 | FAT4      | 1.133482883 | 0.000210921 |
| ENSG00000133773 | CCDC59    | 1.133625591 | 0.032174764 |
| ENSG00000144354 | CDCA7     | 1.133648913 | 0.000435806 |
| ENSG00000106025 | TSPAN12   | 1.133749522 | 0.000352524 |
| ENSG00000127329 | PTPRB     | 1.133754269 | 2.36E-08    |
| ENSG00000028137 | TNFRSF1B  | 1.133771394 | 0.030262106 |
| ENSG00000182916 | TCEAL7    | 1.134027993 | 0.005212148 |
| ENSG00000164403 | SHROOM1   | 1.134101781 | 1.81E-06    |
| ENSG00000120662 | MTRF1     | 1.134126401 | 8.54E-06    |
| ENSG00000070404 | FSTL3     | 1.134173218 | 1.70E-05    |
| ENSG00000101000 | PROCR     | 1.134221918 | 0.002395224 |
| ENSG00000106638 | TBL2      | 1.134262314 | 0.00092239  |
| ENSG00000145220 | LYAR      | 1.134274941 | 2.82E-06    |
| ENSG00000112977 | DAP       | 1.134275969 | 0.000183544 |
| ENSG00000175581 | MRPL48    | 1.134334452 | 1.55E-06    |
| ENSG00000172954 | LCLAT1    | 1.134386394 | 3.99E-10    |
| ENSG00000179163 | FUCA1     | 1.13440726  | 0.000568005 |
| ENSG00000183763 | TRAIP     | 1.134421451 | 9.25E-06    |
| ENSG00000162782 | TDRD5     | 1.134476374 | 0.004626723 |
| ENSG00000117155 | SSX2IP    | 1.13451393  | 0.000126462 |
| ENSG00000128245 | YWHAH     | 1.134523041 | 0.007203859 |
| ENSG00000171757 | LRRC34    | 1.134715462 | 0.005065454 |
| ENSG00000120738 | EGR1      | 1.13473104  | 0.001194036 |
| ENSG00000152492 | CCDC50    | 1.134811141 | 4.57E-07    |
| ENSG00000183160 | TMEM119   | 1.134846667 | 0.005605365 |
| ENSG00000196787 | HIST1H2AG | 1.135045921 | 0.012575637 |
| ENSG00000146243 | IRAK1BP1  | 1.135057976 | 0.014562814 |
| ENSG00000101639 | CEP192    | 1.135188611 | 8.12E-05    |
| ENSG00000106070 | GRB10     | 1.135218574 | 0.000326676 |
| ENSG00000156802 | ATAD2     | 1.135274796 | 0.000153533 |
| ENSG00000119397 | CNTRL     | 1.135320976 | 1.18E-06    |
| ENSG00000003393 | ALS2      | 1.135369267 | 3.46E-08    |
| ENSG00000165244 | ZNF367    | 1.135395678 | 0.000463692 |

|                 |           |             |             |
|-----------------|-----------|-------------|-------------|
| ENSG00000135750 | KCNK1     | 1.135446245 | 0.042841962 |
| ENSG00000122861 | PLAU      | 1.135556223 | 0.005899927 |
| ENSG00000188483 | IER5L     | 1.135574284 | 4.13E-06    |
| ENSG00000143494 | VASH2     | 1.135655896 | 1.32E-05    |
| ENSG00000066056 | TIE1      | 1.135663656 | 0.032086551 |
| ENSG00000145864 | GABRB2    | 1.135696186 | 0.008560868 |
| ENSG00000164099 | PRSS12    | 1.135725804 | 0.003601536 |
| ENSG00000140092 | FBLN5     | 1.135762561 | 0.00054424  |
| ENSG00000006125 | AP2B1     | 1.135765153 | 0.002963701 |
| ENSG00000184967 | NOC4L     | 1.135891117 | 1.92E-07    |
| ENSG00000175063 | UBE2C     | 1.135936216 | 0.007746375 |
| ENSG00000113140 | SPARC     | 1.136114173 | 0.030576696 |
| ENSG00000138346 | DNA2      | 1.136255741 | 2.90E-05    |
| ENSG00000163013 | FBXO41    | 1.136335996 | 4.08E-06    |
| ENSG00000136872 | ALDOB     | 1.136367599 | 0.007697947 |
| ENSG00000111596 | CNOT2     | 1.136435304 | 0.010185732 |
| ENSG00000058804 | NDC1      | 1.136560356 | 1.12E-07    |
| ENSG00000112312 | GMNN      | 1.136580517 | 0.014014773 |
| ENSG00000106012 | IQCE      | 1.136643667 | 0.00032281  |
| ENSG00000120889 | TNFRSF10B | 1.136905925 | 8.66E-07    |
| ENSG00000165802 | NSMF      | 1.13692916  | 0.002532529 |
| ENSG00000153214 | TMEM87B   | 1.137031973 | 2.40E-09    |
| ENSG00000159885 | ZNF222    | 1.137169914 | 0.000218637 |
| ENSG00000185920 | PTCH1     | 1.137188912 | 1.76E-05    |
| ENSG00000149679 | CABLES2   | 1.137218301 | 4.38E-07    |
| ENSG00000100526 | CDKN3     | 1.137221862 | 0.006768285 |
| ENSG00000061794 | MRPS35    | 1.137292455 | 0.004255309 |
| ENSG00000198246 | SLC29A3   | 1.137363738 | 1.18E-07    |
| ENSG00000105963 | ADAP1     | 1.137415761 | 0.003650861 |
| ENSG00000158186 | MRAS      | 1.137487691 | 2.60E-05    |
| ENSG00000002834 | LASP1     | 1.137506228 | 0.005255093 |
| ENSG00000114993 | RTKN      | 1.137797517 | 0.000238277 |
| ENSG00000123219 | CENPK     | 1.137809997 | 0.002501924 |
| ENSG00000124145 | SDC4      | 1.137994995 | 0.003706504 |
| ENSG00000106125 | FAM188B   | 1.13801461  | 1.76E-05    |
| ENSG00000117010 | ZNF684    | 1.138054731 | 7.11E-07    |
| ENSG00000172037 | LAMB2     | 1.138086869 | 5.70E-07    |
| ENSG00000077514 | POLD3     | 1.138172537 | 0.00086617  |
| ENSG00000138778 | CENPE     | 1.138248594 | 0.004200734 |
| ENSG00000131781 | FMO5      | 1.138254971 | 0.046413313 |
| ENSG00000147535 | PPAPDC1B  | 1.138394085 | 1.67E-07    |
| ENSG00000143067 | ZNF697    | 1.13841451  | 2.63E-08    |
| ENSG00000110318 | KIAA1377  | 1.138441844 | 4.52E-08    |
| ENSG00000156970 | BUB1B     | 1.138481138 | 0.001991737 |
| ENSG00000143578 | CREB3L4   | 1.138517922 | 2.51E-05    |
| ENSG00000162337 | LRP5      | 1.138607774 | 0.000441231 |
| ENSG00000172348 | RCAN2     | 1.138741344 | 0.0127984   |

|                 |          |             |             |
|-----------------|----------|-------------|-------------|
| ENSG00000111581 | NUP107   | 1.138770317 | 0.025213937 |
| ENSG00000116918 | TSNAX    | 1.138821461 | 0.037414384 |
| ENSG00000146535 | GNA12    | 1.138885601 | 4.56E-12    |
| ENSG00000164647 | STEAP1   | 1.138962319 | 0.019925039 |
| ENSG00000105879 | CBLL1    | 1.138967322 | 4.09E-05    |
| ENSG00000152291 | TGOLN2   | 1.138991694 | 9.73E-06    |
| ENSG00000204406 | MBD5     | 1.139016004 | 7.72E-06    |
| ENSG00000165511 | C10orf25 | 1.13920686  | 4.48E-05    |
| ENSG00000181817 | LSM10    | 1.139237764 | 1.47E-09    |
| ENSG00000077232 | DNAJC10  | 1.139257936 | 0.009462527 |
| ENSG00000104093 | DMXL2    | 1.139351096 | 0.048662112 |
| ENSG00000164151 | KIAA0947 | 1.139362898 | 1.35E-06    |
| ENSG00000056277 | ZNF280C  | 1.13949738  | 0.002288638 |
| ENSG00000163069 | SGCB     | 1.139598483 | 1.80E-06    |
| ENSG00000165915 | SLC39A13 | 1.139624148 | 1.73E-11    |
| ENSG00000128581 | RABL5    | 1.139639434 | 7.45E-06    |
| ENSG00000131238 | PPT1     | 1.139765509 | 1.96E-10    |
| ENSG00000167608 | TMC4     | 1.139864816 | 0.000166179 |
| ENSG00000167617 | CDC42EP5 | 1.139927261 | 0.012109348 |
| ENSG00000143324 | XPR1     | 1.139987166 | 7.69E-08    |
| ENSG00000154309 | DISP1    | 1.140007546 | 0.004636499 |
| ENSG00000198846 | TOX      | 1.140147036 | 0.000696084 |
| ENSG00000176401 | EID2B    | 1.140167792 | 0.00103799  |
| ENSG00000138002 | IFT172   | 1.140623139 | 6.57E-06    |
| ENSG00000056998 | GYG2     | 1.14063368  | 2.91E-05    |
| ENSG00000106665 | CLIP2    | 1.140655782 | 0.004690368 |
| ENSG00000156587 | UBE2L6   | 1.140659078 | 0.000940581 |
| ENSG00000165322 | ARHGAP12 | 1.140770054 | 0.020885254 |
| ENSG00000030066 | NUP160   | 1.140790415 | 9.70E-08    |
| ENSG00000118513 | MYB      | 1.140881298 | 0.000335675 |
| ENSG00000124766 | SOX4     | 1.140896552 | 0.002872474 |
| ENSG00000132561 | MATN2    | 1.140995642 | 0.003647383 |
| ENSG00000132773 | TOE1     | 1.141049476 | 2.88E-10    |
| ENSG00000143633 | C1orf131 | 1.141093781 | 3.11E-11    |
| ENSG00000127423 | AUNIP    | 1.141151131 | 1.81E-05    |
| ENSG00000095539 | SEMA4G   | 1.141337432 | 0.001183192 |
| ENSG00000143653 | SCCPDH   | 1.141446837 | 0.00059007  |
| ENSG00000147118 | ZNF182   | 1.141469295 | 5.52E-07    |
| ENSG00000138448 | ITGAV    | 1.141505472 | 0.032454802 |
| ENSG00000185684 | EP400NL  | 1.14165876  | 7.63E-06    |
| ENSG00000175745 | NR2F1    | 1.141670419 | 4.33E-06    |
| ENSG00000132437 | DDC      | 1.14167304  | 0.015848901 |
| ENSG00000196284 | SUPT3H   | 1.141699436 | 5.19E-06    |
| ENSG00000256087 | ZNF432   | 1.141806786 | 0.016271198 |
| ENSG00000173698 | GPR64    | 1.141864183 | 0.016749859 |
| ENSG00000165060 | FXN      | 1.141977433 | 2.21E-05    |
| ENSG00000231389 | HLA-DPA1 | 1.141996926 | 0.007090616 |

|                 |          |             |             |
|-----------------|----------|-------------|-------------|
| ENSG00000170190 | SLC16A5  | 1.142191414 | 4.03E-05    |
| ENSG00000088305 | DNMT3B   | 1.142200125 | 8.53E-06    |
| ENSG00000120254 | MTHFD1L  | 1.142519511 | 2.63E-09    |
| ENSG00000197261 | C6orf141 | 1.142522632 | 0.006856028 |
| ENSG00000047230 | CTPS2    | 1.142527033 | 2.15E-06    |
| ENSG00000157657 | ZNF618   | 1.142555962 | 1.79E-05    |
| ENSG00000189227 | C15orf61 | 1.142566114 | 4.89E-08    |
| ENSG00000101596 | SMCHD1   | 1.142726961 | 1.50E-06    |
| ENSG00000152763 | WDR78    | 1.142829078 | 2.33E-05    |
| ENSG00000110917 | MLEC     | 1.14296168  | 0.005854408 |
| ENSG00000111859 | NEDD9    | 1.143033965 | 0.002373591 |
| ENSG00000172156 | CCL11    | 1.143102153 | 0.006385972 |
| ENSG00000136141 | LRCH1    | 1.143123566 | 1.76E-08    |
| ENSG00000043591 | ADRB1    | 1.143127034 | 0.000620376 |
| ENSG00000064313 | TAF2     | 1.143153187 | 0.030105382 |
| ENSG00000185947 | ZNF267   | 1.14321613  | 0.010145923 |
| ENSG00000185862 | EVI2B    | 1.14321958  | 0.036311292 |
| ENSG00000086619 | ERO1LB   | 1.143400742 | 0.000350282 |
| ENSG00000088325 | TPX2     | 1.143516378 | 0.00605708  |
| ENSG00000107796 | ACTA2    | 1.143534539 | 0.004951749 |
| ENSG00000173852 | DPY19L1  | 1.143553828 | 0.003092953 |
| ENSG00000130203 | APOE     | 1.143574079 | 4.87E-05    |
| ENSG00000049323 | LTBP1    | 1.143611861 | 0.000919561 |
| ENSG00000179988 | PSTK     | 1.143648622 | 0.001737353 |
| ENSG00000137166 | FOXP4    | 1.143760285 | 2.89E-08    |
| ENSG00000130513 | GDF15    | 1.143815143 | 0.008828347 |
| ENSG00000173193 | PARP14   | 1.143880441 | 6.28E-07    |
| ENSG00000063322 | MED29    | 1.143939002 | 1.96E-06    |
| ENSG00000108582 | CPD      | 1.143956997 | 1.22E-07    |
| ENSG00000030110 | BAK1     | 1.143988226 | 0.004685392 |
| ENSG00000139178 | C1RL     | 1.14405992  | 1.76E-12    |
| ENSG00000148935 | GAS2     | 1.144291257 | 0.000165699 |
| ENSG00000083842 | ZNF8     | 1.144373749 | 9.89E-07    |
| ENSG00000124839 | RAB17    | 1.144386778 | 0.001600646 |
| ENSG00000181924 | COA4     | 1.144428085 | 3.06E-10    |
| ENSG00000171159 | C9orf16  | 1.144472857 | 0.00038404  |
| ENSG00000160867 | FGFR4    | 1.14460437  | 0.007752151 |
| ENSG00000084774 | CAD      | 1.144611129 | 9.26E-07    |
| ENSG00000146433 | TMEM181  | 1.144671033 | 8.28E-10    |
| ENSG00000187801 | ZFP69B   | 1.144825115 | 6.16E-05    |
| ENSG00000119969 | HELLS    | 1.144866313 | 0.019233521 |
| ENSG00000131471 | AOC3     | 1.144871306 | 0.009392803 |
| ENSG00000173465 | SSSCA1   | 1.144947411 | 1.32E-09    |
| ENSG00000153064 | BANK1    | 1.144986655 | 0.001392949 |
| ENSG00000138823 | MTTP     | 1.14508677  | 0.00235197  |
| ENSG00000147804 | SLC39A4  | 1.145159675 | 0.001257134 |
| ENSG00000117586 | TNFSF4   | 1.145191968 | 0.005248748 |

|                 |            |             |             |
|-----------------|------------|-------------|-------------|
| ENSG00000137486 | ARRB1      | 1.145213151 | 6.70E-06    |
| ENSG00000162543 | UBXN10     | 1.145239537 | 2.03E-06    |
| ENSG00000142173 | COL6A2     | 1.145273521 | 0.000520969 |
| ENSG00000203943 | SAMD13     | 1.145298578 | 0.007080723 |
| ENSG00000168283 | BMI1       | 1.145362347 | 0.048807533 |
| ENSG00000197256 | KANK2      | 1.145491457 | 9.05E-05    |
| ENSG00000198673 | FAM19A2    | 1.145495645 | 0.014256849 |
| ENSG00000156006 | NAT2       | 1.145602988 | 0.010711788 |
| ENSG00000147168 | IL2RG      | 1.145673989 | 0.004978836 |
| ENSG00000198915 | RASGEF1A   | 1.145761799 | 0.002942133 |
| ENSG00000163520 | FBLN2      | 1.145763756 | 0.000673563 |
| ENSG00000171492 | LRRC8D     | 1.145853203 | 0.001052768 |
| ENSG00000117069 | ST6GALNAC5 | 1.146086217 | 0.000746678 |
| ENSG00000088451 | TGDS       | 1.14611306  | 6.36E-07    |
| ENSG00000011600 | TYROBP     | 1.14616529  | 0.025422997 |
| ENSG00000140391 | TSPAN3     | 1.146238356 | 0.000477479 |
| ENSG00000178104 | PDE4DIP    | 1.146279291 | 3.09E-10    |
| ENSG00000211598 | IGKV4-1    | 1.146447059 | 0.008458423 |
| ENSG00000115306 | SPTBN1     | 1.14648749  | 5.99E-11    |
| ENSG00000117525 | F3         | 1.146524993 | 5.80E-05    |
| ENSG00000070018 | LRP6       | 1.146604104 | 1.26E-10    |
| ENSG00000126249 | PDCD2L     | 1.146687246 | 2.15E-05    |
| ENSG00000128534 | NAA38      | 1.146700741 | 7.12E-06    |
| ENSG00000204520 | MICA       | 1.146872392 | 7.14E-06    |
| ENSG00000114547 | ROPN1B     | 1.146892212 | 0.004984971 |
| ENSG00000102805 | CLN5       | 1.146994262 | 5.73E-06    |
| ENSG00000110719 | TCIRG1     | 1.147137154 | 0.001478606 |
| ENSG00000036473 | OTC        | 1.147291765 | 0.007476839 |
| ENSG00000165757 | KIAA1462   | 1.147337289 | 9.04E-08    |
| ENSG00000187164 | KIAA1598   | 1.14734028  | 0.048212683 |
| ENSG00000178927 | C17orf62   | 1.147461402 | 0.000114213 |
| ENSG00000179598 | PLD6       | 1.147515913 | 4.35E-05    |
| ENSG00000141934 | PPAP2C     | 1.147517984 | 0.005948153 |
| ENSG00000110079 | MS4A4A     | 1.147534034 | 0.000732962 |
| ENSG00000120708 | TGFBI      | 1.147589886 | 0.006216335 |
| ENSG00000144724 | PTPRG      | 1.147669816 | 0.003921545 |
| ENSG00000138134 | STAMBPL1   | 1.147731189 | 1.41E-05    |
| ENSG00000170412 | GPRC5C     | 1.14777752  | 0.000156998 |
| ENSG00000136522 | MRPL47     | 1.147805141 | 7.74E-09    |
| ENSG00000107281 | NPDC1      | 1.147806243 | 0.000265778 |
| ENSG00000073910 | FRY        | 1.147878754 | 4.91E-06    |
| ENSG00000185686 | PRAME      | 1.147888152 | 0.015109231 |
| ENSG00000129757 | CDKN1C     | 1.147928916 | 3.23E-07    |
| ENSG00000198863 | RUNDC1     | 1.148152512 | 6.13E-11    |
| ENSG00000140832 | MARVELD3   | 1.14836671  | 1.30E-07    |
| ENSG00000156853 | ZNF689     | 1.148384424 | 5.23E-06    |
| ENSG00000154589 | LY96       | 1.148416924 | 0.017074686 |

|                 |          |             |             |
|-----------------|----------|-------------|-------------|
| ENSG00000214274 | ANG      | 1.148439435 | 0.024730207 |
| ENSG00000104870 | FCGRT    | 1.148611319 | 0.001488512 |
| ENSG00000215018 | COL28A1  | 1.148703281 | 0.005798944 |
| ENSG00000214530 | STARD10  | 1.148748063 | 3.80E-06    |
| ENSG00000049089 | COL9A2   | 1.148808986 | 0.000194668 |
| ENSG00000136514 | RTP4     | 1.148826748 | 0.00173412  |
| ENSG00000217555 | CKLF     | 1.148878736 | 0.002966083 |
| ENSG00000182118 | FAM89A   | 1.148951979 | 2.00E-05    |
| ENSG00000106546 | AHR      | 1.149080952 | 0.006877304 |
| ENSG00000054983 | GALC     | 1.149159035 | 0.000486525 |
| ENSG00000135968 | GCC2     | 1.149345332 | 0.035352781 |
| ENSG00000158528 | PPP1R9A  | 1.149424669 | 0.000323189 |
| ENSG00000166866 | MYO1A    | 1.149494468 | 0.000756275 |
| ENSG00000180346 | TIGD2    | 1.14973565  | 9.18E-07    |
| ENSG00000213221 | DNLZ     | 1.149809679 | 5.85E-07    |
| ENSG00000132744 | ACY3     | 1.149850358 | 2.96E-05    |
| ENSG00000157224 | CLDN12   | 1.149887417 | 1.72E-05    |
| ENSG00000050405 | LIMA1    | 1.149909392 | 0.00129428  |
| ENSG00000198841 | KTI12    | 1.149968837 | 9.38E-08    |
| ENSG00000066279 | ASPM     | 1.150103879 | 0.000552494 |
| ENSG00000130300 | PLVAP    | 1.150112471 | 1.05E-05    |
| ENSG00000171448 | ZBTB26   | 1.15020173  | 1.91E-06    |
| ENSG00000142871 | CYR61    | 1.150232621 | 0.000130759 |
| ENSG00000132530 | XAF1     | 1.150294181 | 0.002839653 |
| ENSG00000171848 | RRM2     | 1.150307202 | 0.026290656 |
| ENSG00000130706 | ADRM1    | 1.150509274 | 3.67E-08    |
| ENSG00000128266 | GNAZ     | 1.15073835  | 0.001662273 |
| ENSG00000156510 | HKDC1    | 1.150819393 | 7.69E-10    |
| ENSG00000168615 | ADAM9    | 1.150950097 | 0.045671851 |
| ENSG00000211644 | IGLV1-51 | 1.151122677 | 0.008987202 |
| ENSG00000167981 | ZNF597   | 1.151167022 | 0.000968253 |
| ENSG00000128944 | KNSTRN   | 1.151179104 | 3.12E-05    |
| ENSG00000131910 | NR0B2    | 1.151182937 | 0.002066467 |
| ENSG00000130508 | PXDN     | 1.151257142 | 0.003173832 |
| ENSG00000113368 | LMNB1    | 1.151275545 | 0.012557984 |
| ENSG00000184154 | LRTOMT   | 1.151407399 | 0.00325081  |
| ENSG00000141542 | RAB40B   | 1.151589345 | 8.85E-10    |
| ENSG00000110042 | DTX4     | 1.151785493 | 0.001012857 |
| ENSG00000175548 | ALG10B   | 1.151906706 | 0.004152335 |
| ENSG00000134569 | LRP4     | 1.152086606 | 0.014199751 |
| ENSG00000125931 | CITED1   | 1.152196248 | 0.000130773 |
| ENSG00000112981 | NME5     | 1.152219927 | 0.003119798 |
| ENSG00000165030 | NFIL3    | 1.152350381 | 1.96E-05    |
| ENSG00000163521 | GLB1L    | 1.152418105 | 1.07E-05    |
| ENSG00000124574 | ABCC10   | 1.152691302 | 3.35E-09    |
| ENSG00000162836 | ACP6     | 1.152775212 | 4.40E-07    |
| ENSG00000116406 | EDEM3    | 1.152936283 | 1.01E-05    |

|                 |          |             |             |
|-----------------|----------|-------------|-------------|
| ENSG00000138075 | ABCG5    | 1.152961039 | 0.004000741 |
| ENSG00000163918 | RFC4     | 1.15322759  | 0.001732629 |
| ENSG00000112394 | SLC16A10 | 1.153268345 | 0.003527528 |
| ENSG00000185499 | MUC1     | 1.15329241  | 0.02494207  |
| ENSG00000170571 | EMB      | 1.153299216 | 6.10E-05    |
| ENSG00000107485 | GATA3    | 1.153393423 | 0.013234373 |
| ENSG00000105976 | MET      | 1.153504269 | 1.19E-07    |
| ENSG00000185745 | IFIT1    | 1.153568513 | 0.045752057 |
| ENSG00000137691 | C11orf70 | 1.153578756 | 8.06E-05    |
| ENSG00000213614 | HEXA     | 1.15360085  | 3.73E-10    |
| ENSG00000179820 | MYADM    | 1.153628151 | 6.44E-05    |
| ENSG00000156469 | MTERFD1  | 1.153695164 | 0.006888903 |
| ENSG00000104524 | PYCRL    | 1.153784259 | 1.69E-08    |
| ENSG00000168078 | PBK      | 1.153874887 | 0.025562875 |
| ENSG00000065485 | PDIA5    | 1.154069285 | 0.000236281 |
| ENSG00000139211 | AMIGO2   | 1.154084106 | 0.016553261 |
| ENSG00000140749 | IGSF6    | 1.154119061 | 0.006158719 |
| ENSG00000158164 | TMSB15A  | 1.154167905 | 0.015242379 |
| ENSG00000117523 | PRRC2C   | 1.154269918 | 1.92E-10    |
| ENSG00000187815 | ZFP69    | 1.154386584 | 0.000577497 |
| ENSG00000120820 | GLT8D2   | 1.154590425 | 0.000106791 |
| ENSG00000097046 | CDC7     | 1.15461181  | 0.004129282 |
| ENSG00000069712 | KIAA1107 | 1.15473308  | 5.13E-05    |
| ENSG00000126458 | RRAS     | 1.154767861 | 1.18E-06    |
| ENSG00000174939 | ASPHD1   | 1.154785767 | 0.006671009 |
| ENSG00000169696 | ASPSR1   | 1.154860485 | 7.64E-06    |
| ENSG00000138080 | EMILIN1  | 1.154904637 | 0.000322519 |
| ENSG00000101224 | CDC25B   | 1.154949924 | 0.002388131 |
| ENSG00000109689 | STIM2    | 1.155257047 | 3.15E-09    |
| ENSG00000198380 | GFPT1    | 1.155299935 | 0.006081214 |
| ENSG00000100523 | DDHD1    | 1.155372894 | 7.32E-07    |
| ENSG00000182326 | C1S      | 1.155568109 | 0.012201992 |
| ENSG00000242574 | HLA-DMB  | 1.155649206 | 0.003925115 |
| ENSG00000165959 | CLMN     | 1.155687526 | 0.007751395 |
| ENSG00000137492 | PRKRIR   | 1.155723618 | 0.002349409 |
| ENSG00000107897 | ACBD5    | 1.155948973 | 2.05E-08    |
| ENSG00000151834 | GABRA2   | 1.155966306 | 0.020137829 |
| ENSG00000173588 | CCDC41   | 1.155977202 | 2.19E-06    |
| ENSG00000163535 | SGOL2    | 1.156110913 | 0.000118977 |
| ENSG00000163697 | APBB2    | 1.15616757  | 2.69E-06    |
| ENSG00000032742 | IFT88    | 1.156315565 | 7.45E-10    |
| ENSG00000178462 | TUBAL3   | 1.156486667 | 0.003180325 |
| ENSG00000047597 | XK       | 1.15656236  | 0.039821922 |
| ENSG00000118514 | ALDH8A1  | 1.156630398 | 0.014827217 |
| ENSG00000138755 | CXCL9    | 1.157021139 | 0.012968936 |
| ENSG00000187210 | GCNT1    | 1.157058356 | 0.022994115 |
| ENSG00000102038 | SMARCA1  | 1.157126022 | 0.000912494 |

|                 |          |             |             |
|-----------------|----------|-------------|-------------|
| ENSG00000091409 | ITGA6    | 1.157150347 | 0.007726864 |
| ENSG00000172915 | NBEA     | 1.157223369 | 0.000773739 |
| ENSG00000108753 | HNFB1B   | 1.157387915 | 0.006139763 |
| ENSG00000144426 | NBEAL1   | 1.157411098 | 5.27E-05    |
| ENSG00000183779 | ZNF703   | 1.157420582 | 1.16E-06    |
| ENSG00000111801 | BTN3A3   | 1.157465486 | 0.015338371 |
| ENSG00000196418 | ZNF124   | 1.157498932 | 3.15E-06    |
| ENSG00000214290 | COLCA2   | 1.157644027 | 0.002028218 |
| ENSG00000186340 | THBS2    | 1.157688315 | 0.024438062 |
| ENSG00000135318 | NT5E     | 1.157743592 | 0.011280944 |
| ENSG00000107863 | ARHGAP21 | 1.157744455 | 1.50E-08    |
| ENSG00000170458 | CD14     | 1.157762752 | 0.00651957  |
| ENSG00000156170 | NDUFAF6  | 1.157777757 | 2.03E-06    |
| ENSG00000151229 | SLC2A13  | 1.157852917 | 2.07E-09    |
| ENSG00000139318 | DUSP6    | 1.157915511 | 9.58E-05    |
| ENSG00000162745 | OLFML2B  | 1.157924341 | 0.014644541 |
| ENSG00000130222 | GADD45G  | 1.158184573 | 0.000138134 |
| ENSG00000117479 | SLC19A2  | 1.158192163 | 7.83E-07    |
| ENSG00000103494 | RPGRIP1L | 1.158266015 | 0.000109807 |
| ENSG00000004864 | SLC25A13 | 1.158280094 | 0.001636462 |
| ENSG00000129009 | ISLR     | 1.158283833 | 0.000263896 |
| ENSG00000073712 | FERMT2   | 1.158469933 | 3.94E-05    |
| ENSG00000170088 | TMEM192  | 1.158658257 | 1.02E-05    |
| ENSG00000204264 | PSMB8    | 1.158719201 | 0.0007693   |
| ENSG00000113209 | PCDHB5   | 1.158748938 | 0.026724302 |
| ENSG00000059804 | SLC2A3   | 1.158812061 | 1.78E-06    |
| ENSG00000135480 | KRT7     | 1.158925014 | 2.74E-05    |
| ENSG00000154734 | ADAMTS1  | 1.158975134 | 1.16E-05    |
| ENSG00000172985 | SH3RF3   | 1.159174089 | 2.32E-05    |
| ENSG00000153233 | PTPRR    | 1.159278406 | 0.034295112 |
| ENSG00000025434 | NR1H3    | 1.159581746 | 0.003028558 |
| ENSG00000116793 | PHTF1    | 1.159780992 | 3.02E-06    |
| ENSG00000143416 | SELENBP1 | 1.159843059 | 1.51E-06    |
| ENSG00000124785 | NRN1     | 1.159867769 | 0.026552911 |
| ENSG00000015475 | BID      | 1.159971621 | 0.000316749 |
| ENSG00000134321 | RSAD2    | 1.16010434  | 0.028690671 |
| ENSG00000158869 | FCER1G   | 1.16011638  | 0.00399238  |
| ENSG00000189058 | APOD     | 1.160150759 | 0.000450848 |
| ENSG00000178409 | BEND3    | 1.16034684  | 2.00E-07    |
| ENSG00000173546 | CSPG4    | 1.160449985 | 6.26E-06    |
| ENSG00000198087 | CD2AP    | 1.160590792 | 0.012625067 |
| ENSG00000101189 | MRGBP    | 1.160694354 | 0.003153186 |
| ENSG00000153944 | MSI2     | 1.16097602  | 8.43E-09    |
| ENSG00000187123 | LYPD6    | 1.160981274 | 2.96E-06    |
| ENSG00000087448 | KLHL42   | 1.16104516  | 4.22E-06    |
| ENSG00000164933 | SLC25A32 | 1.161090362 | 0.009918474 |
| ENSG00000118503 | TNFAIP3  | 1.161125883 | 0.03645556  |

|                 |            |             |             |
|-----------------|------------|-------------|-------------|
| ENSG00000088727 | KIF9       | 1.16113621  | 8.58E-10    |
| ENSG00000102172 | SMS        | 1.161143891 | 0.008007499 |
| ENSG00000157873 | TNFRSF14   | 1.161248999 | 0.007004903 |
| ENSG00000151065 | DCP1B      | 1.161249094 | 6.07E-09    |
| ENSG00000151012 | SLC7A11    | 1.161252239 | 0.002154332 |
| ENSG00000214413 | BBIP1      | 1.1613526   | 2.56E-08    |
| ENSG00000147382 | FAM58A     | 1.161443717 | 1.82E-11    |
| ENSG00000111452 | GPR133     | 1.161575214 | 0.039294275 |
| ENSG00000131203 | IDO1       | 1.161601231 | 0.041915791 |
| ENSG00000173334 | TRIB1      | 1.161646398 | 0.001005896 |
| ENSG00000115468 | EFHD1      | 1.161690971 | 0.001699199 |
| ENSG00000122778 | KIAA1549   | 1.161799076 | 4.84E-09    |
| ENSG00000165556 | CDX2       | 1.161833192 | 0.000108124 |
| ENSG00000184207 | PGP        | 1.161897612 | 6.57E-11    |
| ENSG00000073756 | PTGS2      | 1.161927434 | 0.031456178 |
| ENSG00000168394 | TAP1       | 1.161992752 | 0.007715873 |
| ENSG00000076706 | MCAM       | 1.162098168 | 2.88E-07    |
| ENSG00000226887 | ERVMER34-1 | 1.162356622 | 0.000862202 |
| ENSG00000005108 | THSD7A     | 1.16238491  | 0.000387716 |
| ENSG00000102760 | RGCC       | 1.162407663 | 5.17E-07    |
| ENSG00000184307 | ZDHHC23    | 1.162475622 | 1.29E-06    |
| ENSG00000189184 | PCDH18     | 1.162530941 | 4.79E-05    |
| ENSG00000157800 | SLC37A3    | 1.162559057 | 1.58E-09    |
| ENSG00000129295 | LRRC6      | 1.16277834  | 0.005805452 |
| ENSG00000109205 | ODAM       | 1.162930971 | 0.011294599 |
| ENSG00000144837 | PLA1A      | 1.16303691  | 0.019705911 |
| ENSG00000101882 | NKAP       | 1.163085991 | 5.09E-07    |
| ENSG00000173372 | C1QA       | 1.163205455 | 0.008250353 |
| ENSG00000136960 | ENPP2      | 1.163339217 | 0.047779349 |
| ENSG00000146039 | SLC17A4    | 1.16338819  | 0.004879802 |
| ENSG00000015413 | DPEP1      | 1.16345366  | 0.034440608 |
| ENSG00000214050 | FBXO16     | 1.163470828 | 5.78E-05    |
| ENSG00000115165 | CYTIP      | 1.16358531  | 0.02957533  |
| ENSG00000233493 | TMEM238    | 1.163600561 | 6.26E-07    |
| ENSG00000090971 | NAT14      | 1.163753329 | 1.90E-05    |
| ENSG00000160469 | BRSK1      | 1.163757278 | 0.000887948 |
| ENSG00000166130 | IKBIP      | 1.163781614 | 1.75E-06    |
| ENSG00000135596 | MICAL1     | 1.16378417  | 0.002510003 |
| ENSG00000184007 | PTP4A2     | 1.163908582 | 0.001176045 |
| ENSG00000111247 | RAD51AP1   | 1.164115226 | 0.016702758 |
| ENSG00000167543 | TP53I13    | 1.164152082 | 6.38E-12    |
| ENSG00000100575 | TIMM9      | 1.164346913 | 5.27E-08    |
| ENSG00000146859 | TMEM140    | 1.164585609 | 4.79E-06    |
| ENSG00000211895 | IGHA1      | 1.16464943  | 0.039914098 |
| ENSG00000130707 | ASS1       | 1.164660021 | 0.008851559 |
| ENSG00000070269 | TMEM260    | 1.164741131 | 6.33E-07    |
| ENSG00000100749 | VRK1       | 1.164757183 | 0.007872732 |

|                 |            |             |             |
|-----------------|------------|-------------|-------------|
| ENSG00000124875 | CXCL6      | 1.164822933 | 0.047034134 |
| ENSG00000070669 | ASNS       | 1.164914913 | 0.003311281 |
| ENSG00000169439 | SDC2       | 1.164944717 | 8.53E-05    |
| ENSG00000125895 | TMEM74B    | 1.164988254 | 0.001021103 |
| ENSG00000135124 | P2RX4      | 1.165001053 | 0.000288541 |
| ENSG00000068097 | HEATR6     | 1.165245364 | 4.57E-07    |
| ENSG00000153922 | CHD1       | 1.165450931 | 2.58E-09    |
| ENSG00000080823 | MOK        | 1.165558922 | 3.30E-05    |
| ENSG00000142611 | PRDM16     | 1.165597502 | 0.003365501 |
| ENSG00000163453 | IGFBP7     | 1.165623799 | 0.027420554 |
| ENSG00000146070 | PLA2G7     | 1.165892006 | 0.026635161 |
| ENSG00000162618 | ELTD1      | 1.16634264  | 0.000481681 |
| ENSG00000131711 | MAP1B      | 1.166514074 | 6.66E-05    |
| ENSG00000077585 | GPR137B    | 1.166586047 | 0.001152557 |
| ENSG00000170231 | FABP6      | 1.166768848 | 0.002673201 |
| ENSG00000133114 | GPALPP1    | 1.166891602 | 3.34E-06    |
| ENSG00000138696 | BMPR1B     | 1.167038833 | 0.001859175 |
| ENSG00000178623 | GPR35      | 1.167201556 | 0.000476287 |
| ENSG00000132952 | USPL1      | 1.167217919 | 6.03E-08    |
| ENSG00000169740 | ZNF32      | 1.167253308 | 5.08E-07    |
| ENSG00000169826 | CSGALNACT2 | 1.167282239 | 7.72E-07    |
| ENSG00000158480 | SPATA2     | 1.167331046 | 3.33E-08    |
| ENSG00000121211 | MND1       | 1.16748701  | 0.000441271 |
| ENSG00000109743 | BST1       | 1.167583867 | 7.77E-06    |
| ENSG00000122786 | CALD1      | 1.167614174 | 8.68E-07    |
| ENSG00000116984 | MTR        | 1.167690064 | 2.98E-10    |
| ENSG00000183831 | ANKRD45    | 1.167898203 | 0.003392322 |
| ENSG00000039560 | RAI14      | 1.167976518 | 0.021079395 |
| ENSG00000179085 | DPM3       | 1.167995609 | 3.65E-09    |
| ENSG00000101605 | MYOM1      | 1.168004509 | 7.02E-05    |
| ENSG00000090376 | IRAK3      | 1.1680292   | 0.006198488 |
| ENSG00000164713 | BRI3       | 1.168183561 | 3.36E-09    |
| ENSG00000166959 | MS4A8      | 1.168269451 | 0.002067142 |
| ENSG00000163251 | FZD5       | 1.168353604 | 0.002239519 |
| ENSG00000119729 | RHOQ       | 1.168357693 | 8.62E-09    |
| ENSG00000165115 | KIF27      | 1.168463455 | 1.20E-06    |
| ENSG00000054965 | FAM168A    | 1.168595929 | 6.17E-07    |
| ENSG00000169429 | IL8        | 1.168734798 | 0.037938076 |
| ENSG00000167925 | GHDC       | 1.168872672 | 6.42E-05    |
| ENSG00000152669 | CCNO       | 1.168876573 | 2.73E-06    |
| ENSG00000153982 | GDPD1      | 1.168928528 | 0.000452906 |
| ENSG00000130147 | SH3BP4     | 1.168984769 | 0.001800503 |
| ENSG00000164078 | MST1R      | 1.16904581  | 0.000298665 |
| ENSG00000170540 | ARL6IP1    | 1.169057377 | 0.000136935 |
| ENSG00000154447 | SH3RF1     | 1.169250993 | 2.71E-07    |
| ENSG00000138061 | CYP1B1     | 1.169277984 | 0.034242388 |
| ENSG00000035499 | DEPDC1B    | 1.169388878 | 0.001499908 |

|                 |            |             |             |
|-----------------|------------|-------------|-------------|
| ENSG00000107551 | RASSF4     | 1.169410646 | 2.23E-05    |
| ENSG00000104324 | CPQ        | 1.169420586 | 4.14E-06    |
| ENSG00000162694 | EXTL2      | 1.169453575 | 4.52E-06    |
| ENSG00000087495 | PHACTR3    | 1.169464431 | 0.007513957 |
| ENSG00000222017 | AC011997.1 | 1.169490541 | 0.000370276 |
| ENSG00000115758 | ODC1       | 1.169575307 | 0.013573286 |
| ENSG00000058091 | CDK14      | 1.169614539 | 6.08E-05    |
| ENSG00000042317 | SPATA7     | 1.169817511 | 3.83E-08    |
| ENSG00000257335 | MGAM       | 1.170140058 | 0.001546966 |
| ENSG00000153790 | C7orf31    | 1.17023691  | 1.21E-06    |
| ENSG00000128203 | ASPHD2     | 1.170251802 | 0.000704901 |
| ENSG00000117477 | CCDC181    | 1.170275257 | 0.00471971  |
| ENSG00000139146 | FAM60A     | 1.170342539 | 7.23E-06    |
| ENSG00000198443 | KRTAP4-1   | 1.170669776 | 0.015909951 |
| ENSG00000117643 | MAN1C1     | 1.170788074 | 0.000216894 |
| ENSG00000196549 | MME        | 1.171045875 | 0.004499823 |
| ENSG00000198682 | PAPSS2     | 1.171055422 | 0.000887012 |
| ENSG00000121380 | BCL2L14    | 1.171254949 | 0.008373243 |
| ENSG00000173041 | ZNF680     | 1.171328015 | 9.93E-06    |
| ENSG00000104369 | JPH1       | 1.171423285 | 1.34E-06    |
| ENSG00000170417 | TMEM182    | 1.171470574 | 1.65E-08    |
| ENSG00000181143 | MUC16      | 1.171485782 | 0.011111777 |
| ENSG00000103175 | WFDC1      | 1.171781557 | 0.0001964   |
| ENSG00000168917 | SLC35G2    | 1.171840333 | 0.003904828 |
| ENSG00000196511 | TPK1       | 1.171854702 | 0.033612319 |
| ENSG00000172986 | GXYLT2     | 1.171985064 | 0.000433388 |
| ENSG00000163975 | MF12       | 1.172052931 | 5.55E-05    |
| ENSG00000064270 | ATP2C2     | 1.172071598 | 0.000808608 |
| ENSG00000115641 | FHL2       | 1.172078872 | 2.24E-08    |
| ENSG00000165512 | ZNF22      | 1.172183445 | 1.57E-07    |
| ENSG00000113583 | C5orf15    | 1.172266034 | 0.000505507 |
| ENSG00000007372 | PAX6       | 1.172438658 | 0.001388803 |
| ENSG00000104213 | PDGFRL     | 1.172506767 | 0.00146136  |
| ENSG00000102048 | ASB9       | 1.172554626 | 1.38E-05    |
| ENSG00000157985 | AGAP1      | 1.172677722 | 2.71E-09    |
| ENSG00000158985 | CDC42SE2   | 1.172758101 | 2.32E-08    |
| ENSG00000177570 | SAMD12     | 1.172850592 | 1.43E-09    |
| ENSG00000123689 | G0S2       | 1.172957904 | 0.000866357 |
| ENSG00000052795 | FNIP2      | 1.173506492 | 3.27E-10    |
| ENSG00000188707 | ZBED6CL    | 1.173545157 | 9.59E-08    |
| ENSG00000155380 | SLC16A1    | 1.17364929  | 0.001254252 |
| ENSG00000150471 | LPHN3      | 1.173715084 | 7.35E-05    |
| ENSG00000006042 | TMEM98     | 1.173898243 | 9.34E-10    |
| ENSG00000127561 | SYNGR3     | 1.174108888 | 0.011006925 |
| ENSG00000267795 | SMIM22     | 1.174154744 | 4.30E-06    |
| ENSG00000159713 | TPPP3      | 1.174154746 | 0.000629093 |
| ENSG00000143570 | SLC39A1    | 1.174295431 | 1.91E-08    |

|                 |              |             |             |
|-----------------|--------------|-------------|-------------|
| ENSG00000116774 | OLFML3       | 1.174305727 | 0.00048519  |
| ENSG00000125676 | THOC2        | 1.174334081 | 4.00E-11    |
| ENSG00000232671 | RP11-126K1.2 | 1.174424197 | 3.40E-07    |
| ENSG00000123975 | CKS2         | 1.174592419 | 0.011255945 |
| ENSG00000155660 | PDIA4        | 1.174626167 | 0.000309437 |
| ENSG00000196659 | TTC30B       | 1.174693847 | 4.20E-06    |
| ENSG00000157992 | KRTCAP3      | 1.174701362 | 3.42E-09    |
| ENSG00000186417 | GLDN         | 1.174911979 | 0.000960626 |
| ENSG00000127328 | RAB3IP       | 1.174941988 | 4.84E-05    |
| ENSG00000183150 | GPR19        | 1.175032462 | 0.000580471 |
| ENSG00000204991 | SPIRE2       | 1.175158125 | 3.94E-06    |
| ENSG00000170989 | S1PR1        | 1.175394784 | 0.000540231 |
| ENSG00000107537 | PHYH         | 1.175435482 | 0.022177705 |
| ENSG00000109501 | WFS1         | 1.175461321 | 1.02E-07    |
| ENSG00000146678 | IGFBP1       | 1.175563103 | 0.046943997 |
| ENSG00000082512 | TRAF5        | 1.175575856 | 0.006225319 |
| ENSG00000117399 | CDC20        | 1.175665964 | 0.003877864 |
| ENSG00000166510 | CCDC68       | 1.175776701 | 0.039854296 |
| ENSG00000106366 | SERPINE1     | 1.175787403 | 0.005710576 |
| ENSG00000172366 | FAM195A      | 1.175908122 | 2.95E-09    |
| ENSG00000115828 | QPCT         | 1.17610201  | 0.048225384 |
| ENSG00000051523 | CYBA         | 1.17631923  | 0.000201445 |
| ENSG00000127928 | GNGT1        | 1.176491306 | 0.009110492 |
| ENSG00000179344 | HLA-DQB1     | 1.176547931 | 0.01167143  |
| ENSG00000126787 | DLGAP5       | 1.176579401 | 0.000408315 |
| ENSG00000169347 | GP2          | 1.176598181 | 0.018643176 |
| ENSG00000047634 | SCML1        | 1.176619981 | 1.82E-05    |
| ENSG00000147224 | PRPS1        | 1.176669338 | 8.38E-07    |
| ENSG00000148655 | C10orf11     | 1.17670833  | 5.90E-05    |
| ENSG00000128567 | PODXL        | 1.176843794 | 0.000693745 |
| ENSG00000175445 | LPL          | 1.176980759 | 4.45E-05    |
| ENSG00000151746 | BICD1        | 1.177378542 | 5.84E-08    |
| ENSG00000137745 | MMP13        | 1.177481121 | 0.020474353 |
| ENSG00000163131 | CTSS         | 1.17750445  | 0.004081789 |
| ENSG00000204335 | SP5          | 1.177895409 | 0.000897204 |
| ENSG00000150961 | SEC24D       | 1.178068138 | 2.12E-07    |
| ENSG00000171121 | KCNMB3       | 1.178094329 | 3.19E-08    |
| ENSG00000183963 | SMTN         | 1.178140646 | 1.78E-06    |
| ENSG00000154274 | C4orf19      | 1.178282387 | 0.0030999   |
| ENSG00000073060 | SCARB1       | 1.178289645 | 1.08E-08    |
| ENSG00000137285 | TUBB2B       | 1.178293468 | 0.003446592 |
| ENSG00000127920 | GNG11        | 1.178306339 | 9.82E-06    |
| ENSG00000187049 | TMEM216      | 1.178419465 | 7.28E-13    |
| ENSG00000134285 | FKBP11       | 1.17845403  | 0.00118418  |
| ENSG00000205084 | TMEM231      | 1.178473236 | 1.23E-05    |
| ENSG00000135773 | CAPN9        | 1.178579509 | 0.046330783 |
| ENSG00000166068 | SPRED1       | 1.178608631 | 6.53E-08    |

|                 |          |             |             |
|-----------------|----------|-------------|-------------|
| ENSG00000133111 | RFXAP    | 1.178939793 | 1.32E-07    |
| ENSG00000205047 | FLJ00104 | 1.178969257 | 0.000444065 |
| ENSG00000188487 | INSC     | 1.179008223 | 0.001624949 |
| ENSG00000144407 | PTH2R    | 1.179118853 | 0.044166235 |
| ENSG00000137825 | ITPKA    | 1.179142755 | 2.04E-05    |
| ENSG00000109193 | SULT1E1  | 1.179170743 | 0.007853499 |
| ENSG00000165949 | IFI27    | 1.179378894 | 0.000413127 |
| ENSG00000005884 | ITGA3    | 1.179444085 | 0.001282585 |
| ENSG00000106443 | PHF14    | 1.179542425 | 4.63E-10    |
| ENSG00000149257 | SERPINH1 | 1.179824421 | 0.000661148 |
| ENSG00000203668 | CHML     | 1.179903191 | 4.09E-06    |
| ENSG00000169507 | SLC38A11 | 1.180096591 | 0.008408119 |
| ENSG00000128656 | CHN1     | 1.180408544 | 6.94E-06    |
| ENSG00000106948 | AKNA     | 1.180749891 | 1.15E-06    |
| ENSG00000005448 | WDR54    | 1.180895334 | 1.06E-07    |
| ENSG00000137573 | SULF1    | 1.180924241 | 0.034429118 |
| ENSG00000110721 | CHKA     | 1.18098043  | 0.002959005 |
| ENSG00000104341 | LAPTM4B  | 1.181189164 | 1.08E-05    |
| ENSG00000078401 | EDN1     | 1.181406053 | 3.93E-06    |
| ENSG00000065911 | MTHFD2   | 1.181578436 | 0.00049007  |
| ENSG00000124201 | ZNFX1    | 1.181606783 | 1.91E-12    |
| ENSG00000197142 | ACSL5    | 1.181736506 | 0.012835642 |
| ENSG00000117226 | GBP3     | 1.181773378 | 0.004801653 |
| ENSG00000165806 | CASP7    | 1.182010137 | 0.006763112 |
| ENSG00000163083 | INHBB    | 1.182075156 | 0.010388708 |
| ENSG00000187498 | COL4A1   | 1.182139849 | 0.006507991 |
| ENSG00000171617 | ENC1     | 1.182251768 | 0.002565273 |
| ENSG00000123843 | C4BPB    | 1.182274393 | 0.001352801 |
| ENSG00000196878 | LAMB3    | 1.18236058  | 0.005489772 |
| ENSG00000014914 | MTMR11   | 1.182361809 | 0.001674429 |
| ENSG00000172301 | COPRS    | 1.182558528 | 6.53E-11    |
| ENSG00000256980 | KHDC1L   | 1.182613654 | 0.021842063 |
| ENSG00000083642 | PDS5B    | 1.182671556 | 9.63E-08    |
| ENSG00000105499 | PLA2G4C  | 1.182787218 | 0.000364159 |
| ENSG00000111671 | SPSB2    | 1.182921778 | 1.32E-06    |
| ENSG00000123496 | IL13RA2  | 1.183037884 | 0.000997694 |
| ENSG00000106333 | PCOLCE   | 1.183191147 | 2.40E-07    |
| ENSG00000091436 | MLTK     | 1.183191693 | 1.13E-08    |
| ENSG00000198758 | EPS8L3   | 1.183218485 | 0.005303624 |
| ENSG00000116299 | KIAA1324 | 1.183591941 | 3.64E-05    |
| ENSG00000106077 | ABHD11   | 1.183631228 | 0.006868646 |
| ENSG00000106537 | TSPAN13  | 1.183701237 | 0.00058889  |
| ENSG00000152377 | SPOCK1   | 1.183958858 | 8.10E-05    |
| ENSG00000184988 | TMEM106A | 1.183986166 | 4.64E-06    |
| ENSG00000153904 | DDAH1    | 1.18412376  | 0.002738503 |
| ENSG00000163435 | ELF3     | 1.184231661 | 0.003460621 |
| ENSG00000154736 | ADAMTS5  | 1.184306292 | 1.11E-06    |

|                 |          |             |             |
|-----------------|----------|-------------|-------------|
| ENSG00000156876 | SASS6    | 1.184323094 | 2.31E-06    |
| ENSG00000109452 | INPP4B   | 1.18447097  | 0.007735091 |
| ENSG00000173926 | 3-Mar    | 1.184535409 | 0.025692246 |
| ENSG00000145088 | EAF2     | 1.184611357 | 2.26E-07    |
| ENSG00000166575 | TMEM135  | 1.184737623 | 0.005564457 |
| ENSG00000165113 | GKAP1    | 1.185020321 | 5.12E-08    |
| ENSG00000188811 | NHLRC3   | 1.18535394  | 2.27E-09    |
| ENSG00000198546 | ZNF511   | 1.185523076 | 3.27E-11    |
| ENSG00000103429 | BFAR     | 1.185646814 | 0.000117775 |
| ENSG00000261652 | C15orf65 | 1.185653739 | 5.55E-05    |
| ENSG00000146232 | NFKBIE   | 1.185687943 | 5.84E-05    |
| ENSG00000105523 | FAM83E   | 1.185900289 | 0.01117723  |
| ENSG00000170456 | DENND5B  | 1.186048438 | 3.94E-05    |
| ENSG00000077152 | UBE2T    | 1.186228733 | 9.25E-06    |
| ENSG00000164610 | RP9      | 1.186838606 | 3.78E-10    |
| ENSG00000130988 | RGN      | 1.186906178 | 0.001955276 |
| ENSG00000002933 | TMEM176A | 1.186985143 | 0.00094619  |
| ENSG00000137821 | LRRC49   | 1.186991218 | 5.98E-06    |
| ENSG00000170017 | ALCAM    | 1.187024064 | 0.023243821 |
| ENSG00000164116 | GUCY1A3  | 1.187039595 | 0.001206186 |
| ENSG00000105699 | LSR      | 1.18706472  | 0.009990938 |
| ENSG00000161179 | YDJC     | 1.187107925 | 1.56E-12    |
| ENSG00000168952 | STXBP6   | 1.187180202 | 0.000102554 |
| ENSG00000100068 | LRP5L    | 1.187231129 | 1.39E-08    |
| ENSG00000011422 | PLAUR    | 1.187240269 | 0.000157095 |
| ENSG00000179299 | NSUN7    | 1.187506433 | 0.000168476 |
| ENSG00000123610 | TNFAIP6  | 1.18758978  | 0.014817158 |
| ENSG00000142686 | C1orf216 | 1.188140789 | 9.87E-07    |
| ENSG00000100342 | APOL1    | 1.188199007 | 0.011908325 |
| ENSG00000137860 | SLC28A2  | 1.18834833  | 0.036314169 |
| ENSG00000083857 | FAT1     | 1.188367732 | 4.94E-05    |
| ENSG00000163359 | COL6A3   | 1.188432808 | 0.007541331 |
| ENSG00000108846 | ABCC3    | 1.188483812 | 4.52E-05    |
| ENSG00000135362 | PRR5L    | 1.188745659 | 6.03E-05    |
| ENSG00000176731 | C8orf59  | 1.188937171 | 9.25E-10    |
| ENSG00000117461 | PIK3R3   | 1.188982132 | 1.84E-07    |
| ENSG00000120334 | CENPL    | 1.188988045 | 1.60E-07    |
| ENSG00000123473 | STIL     | 1.189053386 | 0.006426431 |
| ENSG00000172638 | EFEMP2   | 1.189099445 | 4.42E-09    |
| ENSG00000197008 | ZNF138   | 1.189202578 | 3.19E-05    |
| ENSG00000177363 | LRRN4CL  | 1.189207734 | 9.07E-05    |
| ENSG00000179918 | SEPHS2   | 1.189255639 | 0.000598145 |
| ENSG00000049860 | HEXB     | 1.189278775 | 0.001568805 |
| ENSG00000133739 | LRRCC1   | 1.189365265 | 3.79E-06    |
| ENSG00000148702 | HABP2    | 1.189416983 | 0.00177007  |
| ENSG00000121966 | CXCR4    | 1.189521709 | 0.006466051 |
| ENSG00000078098 | FAP      | 1.189665974 | 0.001037533 |

|                 |            |             |             |
|-----------------|------------|-------------|-------------|
| ENSG00000148735 | PLEKHS1    | 1.18968093  | 0.035568803 |
| ENSG00000219545 | RPA3-AS1   | 1.189754883 | 3.07E-09    |
| ENSG00000112877 | CEP72      | 1.18980033  | 7.07E-05    |
| ENSG00000196126 | HLA-DRB1   | 1.189909959 | 0.000425373 |
| ENSG00000167600 | CYP2S1     | 1.189938458 | 3.06E-05    |
| ENSG00000198780 | FAM169A    | 1.189956467 | 0.000441765 |
| ENSG00000076716 | GPC4       | 1.190111564 | 1.87E-09    |
| ENSG00000186470 | BTN3A2     | 1.190337466 | 0.006004427 |
| ENSG00000101974 | ATP11C     | 1.190587067 | 1.24E-06    |
| ENSG00000064763 | FAR2       | 1.190623361 | 0.007486324 |
| ENSG00000050820 | BCAR1      | 1.19074166  | 7.70E-09    |
| ENSG00000133216 | EPHB2      | 1.190776425 | 4.57E-07    |
| ENSG00000213626 | LBH        | 1.19088877  | 0.018744631 |
| ENSG00000065534 | MYLK       | 1.191037046 | 0.000467938 |
| ENSG00000197557 | TTC30A     | 1.191190976 | 0.000100887 |
| ENSG00000205220 | PSMB10     | 1.191444819 | 0.000566832 |
| ENSG00000183734 | ASCL2      | 1.191502828 | 0.000520261 |
| ENSG00000156313 | RPGR       | 1.191556273 | 2.73E-06    |
| ENSG00000124191 | TOX2       | 1.191628971 | 0.000279047 |
| ENSG00000163923 | RPL39L     | 1.191665948 | 5.14E-07    |
| ENSG00000125730 | C3         | 1.191934692 | 0.018310728 |
| ENSG00000198959 | TGM2       | 1.191950132 | 2.33E-08    |
| ENSG00000147121 | KRBOX4     | 1.192302691 | 4.07E-09    |
| ENSG00000080986 | NDC80      | 1.192417896 | 0.015591821 |
| ENSG00000147027 | TMEM47     | 1.192424981 | 0.001751618 |
| ENSG00000155629 | PIK3AP1    | 1.192522289 | 2.02E-07    |
| ENSG00000196074 | SYCP2      | 1.192595418 | 0.022260234 |
| ENSG00000147251 | DOCK11     | 1.192635084 | 0.001577871 |
| ENSG00000135697 | BCMO1      | 1.192902035 | 0.001396221 |
| ENSG00000008952 | SEC62      | 1.192956854 | 2.22E-14    |
| ENSG00000136205 | TNS3       | 1.193298123 | 0.001332152 |
| ENSG00000176273 | SLC35G1    | 1.193336619 | 1.57E-07    |
| ENSG00000137251 | TINAG      | 1.193377134 | 0.000100273 |
| ENSG00000102935 | ZNF423     | 1.193414697 | 0.000361461 |
| ENSG00000135119 | RNFT2      | 1.193775269 | 4.32E-08    |
| ENSG00000125845 | BMP2       | 1.193951037 | 0.005777813 |
| ENSG00000175567 | UCP2       | 1.193959859 | 0.00054613  |
| ENSG00000203666 | EFCAB2     | 1.194009918 | 4.86E-05    |
| ENSG00000125378 | BMP4       | 1.194052733 | 0.000221001 |
| ENSG00000001036 | FUCA2      | 1.194301535 | 2.55E-12    |
| ENSG00000139832 | RAB20      | 1.194329242 | 3.90E-05    |
| ENSG00000092964 | DPYSL2     | 1.194434559 | 2.69E-07    |
| ENSG00000132640 | BTBD3      | 1.19446773  | 0.016432627 |
| ENSG00000198431 | TXNRD1     | 1.194568715 | 0.001515917 |
| ENSG00000147408 | CSGALNACT1 | 1.194718232 | 0.000364966 |
| ENSG00000050344 | NFE2L3     | 1.194928387 | 0.014480669 |
| ENSG00000196975 | ANXA4      | 1.195018606 | 0.000415353 |

|                 |          |             |             |
|-----------------|----------|-------------|-------------|
| ENSG00000069122 | GPR116   | 1.195027998 | 6.37E-07    |
| ENSG00000079257 | LXN      | 1.195118389 | 5.98E-08    |
| ENSG00000169047 | IRS1     | 1.195256894 | 7.92E-08    |
| ENSG00000086289 | EPDR1    | 1.195314762 | 0.014524987 |
| ENSG00000164109 | MAD2L1   | 1.195697875 | 0.002063765 |
| ENSG00000174607 | UGT8     | 1.195769825 | 9.94E-05    |
| ENSG00000177707 | PVRL3    | 1.19588364  | 0.006028666 |
| ENSG00000122565 | CBX3     | 1.195905269 | 0.001874687 |
| ENSG00000187118 | CMC1     | 1.195932787 | 1.01E-13    |
| ENSG00000185507 | IRF7     | 1.19605564  | 2.33E-07    |
| ENSG00000087586 | AURKA    | 1.196085686 | 0.009845584 |
| ENSG00000171612 | SLC25A33 | 1.196203999 | 1.43E-12    |
| ENSG00000188706 | ZDHHC9   | 1.196610003 | 3.59E-12    |
| ENSG00000135677 | GNS      | 1.196613505 | 2.96E-11    |
| ENSG00000071967 | CYBRD1   | 1.196621741 | 0.000269958 |
| ENSG00000117318 | ID3      | 1.196776504 | 1.65E-06    |
| ENSG00000104290 | FZD3     | 1.196799301 | 3.21E-07    |
| ENSG00000172379 | ARNT2    | 1.197051378 | 0.001932299 |
| ENSG00000108176 | DNAJC12  | 1.197519981 | 6.98E-06    |
| ENSG00000144401 | METTL21A | 1.197811238 | 5.86E-07    |
| ENSG00000164465 | DCBLD1   | 1.197915929 | 1.07E-09    |
| ENSG00000164162 | ANAPC10  | 1.198193508 | 9.53E-07    |
| ENSG00000171502 | COL24A1  | 1.198697423 | 0.001587896 |
| ENSG00000099812 | MISP     | 1.19875137  | 0.000997343 |
| ENSG00000197208 | SLC22A4  | 1.198774778 | 3.22E-05    |
| ENSG00000123609 | NMI      | 1.198792274 | 0.004858174 |
| ENSG00000153179 | RASSF3   | 1.198836699 | 4.22E-08    |
| ENSG00000101003 | GINS1    | 1.198962239 | 0.007564966 |
| ENSG00000165092 | ALDH1A1  | 1.199015416 | 0.024498007 |
| ENSG00000132170 | PPARG    | 1.199219077 | 0.003377526 |
| ENSG00000176485 | PLA2G16  | 1.19932773  | 0.006676073 |
| ENSG00000175329 | ISX      | 1.199397626 | 0.021417957 |
| ENSG00000198455 | ZXDB     | 1.199491437 | 1.13E-05    |
| ENSG00000125347 | IRF1     | 1.199537766 | 0.004992268 |
| ENSG00000095203 | EPB41L4B | 1.1995675   | 0.002198425 |
| ENSG00000131620 | ANO1     | 1.19970833  | 0.00222344  |
| ENSG00000215790 | SLC35E2  | 1.199814161 | 5.65E-05    |
| ENSG00000184220 | CMSS1    | 1.200059702 | 3.31E-09    |
| ENSG00000249992 | TMEM158  | 1.200508633 | 4.14E-06    |
| ENSG00000164877 | MICALL2  | 1.200526378 | 0.000177875 |
| ENSG00000137801 | THBS1    | 1.200541552 | 7.71E-06    |
| ENSG00000114529 | C3orf52  | 1.200783523 | 0.019962932 |
| ENSG00000240694 | PNMA2    | 1.200999694 | 3.53E-06    |
| ENSG00000169330 | KIAA1024 | 1.201565232 | 1.43E-05    |
| ENSG00000134871 | COL4A2   | 1.201618937 | 0.019402258 |
| ENSG00000150687 | PRSS23   | 1.201832995 | 0.013077467 |
| ENSG00000176153 | GPX2     | 1.201910337 | 0.000635339 |

|                 |          |             |             |
|-----------------|----------|-------------|-------------|
| ENSG00000154096 | THY1     | 1.201915769 | 0.002386703 |
| ENSG00000204291 | COL15A1  | 1.202078146 | 0.046842066 |
| ENSG00000121361 | KCNJ8    | 1.202113705 | 2.93E-07    |
| ENSG00000039600 | SOX30    | 1.202611123 | 4.33E-05    |
| ENSG00000160972 | PPP1R16A | 1.202638419 | 3.34E-07    |
| ENSG00000128342 | LIF      | 1.202648993 | 5.25E-13    |
| ENSG00000162065 | TBC1D24  | 1.202915903 | 1.25E-10    |
| ENSG00000174514 | MFSD4    | 1.203069396 | 0.024254234 |
| ENSG00000135862 | LAMC1    | 1.203087218 | 2.89E-12    |
| ENSG00000106688 | SLC1A1   | 1.203285331 | 1.26E-05    |
| ENSG00000131016 | AKAP12   | 1.203390576 | 0.000168014 |
| ENSG00000157593 | SLC35B2  | 1.203589904 | 1.13E-11    |
| ENSG00000108187 | PBLD     | 1.203733279 | 0.036207308 |
| ENSG00000139618 | BRCA2    | 1.203742609 | 5.45E-05    |
| ENSG00000116741 | RGS2     | 1.20384656  | 1.33E-06    |
| ENSG00000213337 | ANKRD39  | 1.203910619 | 5.10E-09    |
| ENSG00000196352 | CD55     | 1.204145115 | 0.000563078 |
| ENSG00000174899 | C3orf55  | 1.204221394 | 0.000864587 |
| ENSG00000060718 | COL11A1  | 1.204330392 | 0.002885745 |
| ENSG00000071794 | HLTF     | 1.204594045 | 4.07E-08    |
| ENSG00000123146 | CD97     | 1.204894809 | 8.84E-05    |
| ENSG00000118849 | RARRES1  | 1.204927649 | 0.01369046  |
| ENSG00000143674 | MLK4     | 1.20508543  | 1.37E-07    |
| ENSG00000148468 | FAM171A1 | 1.205205902 | 0.012863421 |
| ENSG00000144362 | PHOSPHO2 | 1.205280056 | 4.59E-06    |
| ENSG00000102401 | ARMCX3   | 1.205408307 | 0.011905818 |
| ENSG00000162814 | SPATA17  | 1.205415913 | 0.000846769 |
| ENSG00000163171 | CDC42EP3 | 1.205557726 | 7.63E-08    |
| ENSG00000080007 | DDX43    | 1.205630253 | 0.012341814 |
| ENSG00000186007 | LEMD1    | 1.205638312 | 0.006282999 |
| ENSG00000182853 | VMO1     | 1.205830552 | 0.000926237 |
| ENSG00000057294 | PKP2     | 1.20590636  | 3.44E-12    |
| ENSG00000140743 | CDR2     | 1.205934743 | 0.009584748 |
| ENSG00000123096 | SSPN     | 1.206088867 | 0.005452123 |
| ENSG00000183801 | OLFML1   | 1.206301264 | 2.64E-05    |
| ENSG00000169495 | HTRA4    | 1.206301994 | 0.00016149  |
| ENSG00000071073 | MGAT4A   | 1.206837733 | 3.77E-06    |
| ENSG00000160813 | PPP1R35  | 1.207269504 | 3.46E-09    |
| ENSG00000158122 | AAED1    | 1.207432964 | 1.03E-07    |
| ENSG00000132718 | SYT11    | 1.207468471 | 0.000458584 |
| ENSG00000006611 | USH1C    | 1.207677189 | 0.003037702 |
| ENSG00000128683 | GAD1     | 1.207795943 | 0.000708851 |
| ENSG00000110492 | MDK      | 1.207931221 | 0.001150689 |
| ENSG00000162817 | C1orf115 | 1.208242732 | 0.001769557 |
| ENSG00000147592 | LACTB2   | 1.208243281 | 0.02620633  |
| ENSG00000205560 | CPT1B    | 1.208464374 | 0.04045962  |
| ENSG00000169174 | PCSK9    | 1.20854811  | 3.95E-05    |

|                 |              |             |             |
|-----------------|--------------|-------------|-------------|
| ENSG00000021300 | PLEKHB1      | 1.208729902 | 0.021968273 |
| ENSG00000166670 | MMP10        | 1.208937892 | 0.000198065 |
| ENSG00000122176 | FMOD         | 1.209062022 | 1.01E-05    |
| ENSG00000010270 | STARD3NL     | 1.209098157 | 2.67E-08    |
| ENSG00000164181 | ELOVL7       | 1.209998719 | 5.77E-08    |
| ENSG00000138180 | CEP55        | 1.210015331 | 0.00298047  |
| ENSG00000241399 | CD302        | 1.210114179 | 0.037052205 |
| ENSG00000068489 | PRR11        | 1.210423988 | 0.000412283 |
| ENSG00000183891 | TTC32        | 1.210563743 | 3.59E-07    |
| ENSG00000168542 | COL3A1       | 1.210781355 | 0.007799313 |
| ENSG00000111110 | PPM1H        | 1.21081096  | 2.49E-05    |
| ENSG00000144959 | NCEH1        | 1.210923972 | 2.98E-05    |
| ENSG00000152894 | PTPRK        | 1.211291446 | 0.001046531 |
| ENSG00000153395 | LPCAT1       | 1.211551616 | 0.000834935 |
| ENSG00000185950 | IRS2         | 1.21161783  | 9.21E-06    |
| ENSG00000006634 | DBF4         | 1.211863415 | 0.004726245 |
| ENSG00000198734 | F5           | 1.211897996 | 0.044461929 |
| ENSG00000138794 | CASP6        | 1.211924982 | 1.03E-11    |
| ENSG00000106049 | HIBADH       | 1.212223485 | 1.12E-07    |
| ENSG00000004799 | PDK4         | 1.212474171 | 2.32E-07    |
| ENSG00000125266 | EFNB2        | 1.21279594  | 0.002397493 |
| ENSG00000130635 | COL5A1       | 1.212947127 | 0.009968353 |
| ENSG00000145247 | OCIAD2       | 1.213648245 | 3.71E-11    |
| ENSG00000168993 | CPLX1        | 1.213670879 | 0.001227929 |
| ENSG00000155099 | TMEM55A      | 1.213681022 | 1.23E-06    |
| ENSG00000131747 | TOP2A        | 1.213762238 | 0.005705324 |
| ENSG00000125740 | FOSB         | 1.214102093 | 0.000559904 |
| ENSG00000227184 | EPPK1        | 1.214186062 | 9.37E-07    |
| ENSG00000188761 | BCL2L15      | 1.214196843 | 2.53E-06    |
| ENSG00000181634 | TNFSF15      | 1.214277888 | 7.15E-07    |
| ENSG00000188242 | CTD-2228K2.5 | 1.214298985 | 0.014806323 |
| ENSG00000150977 | RILPL2       | 1.21430207  | 3.16E-09    |
| ENSG00000185404 | SP140L       | 1.21477604  | 0.009882105 |
| ENSG00000101825 | MXRA5        | 1.215022408 | 0.000315903 |
| ENSG00000135220 | UGT2A3       | 1.215080323 | 0.00530031  |
| ENSG00000022567 | SLC45A4      | 1.215113863 | 1.39E-09    |
| ENSG00000268172 | AL590452.1   | 1.21522535  | 7.39E-06    |
| ENSG00000133019 | CHRM3        | 1.215370567 | 6.04E-05    |
| ENSG00000106701 | FSD1L        | 1.215613764 | 4.38E-06    |
| ENSG00000169744 | LDB2         | 1.215747953 | 2.80E-05    |
| ENSG00000205269 | TMEM170B     | 1.215847199 | 9.91E-05    |
| ENSG00000243955 | GSTA1        | 1.216292984 | 0.020300645 |
| ENSG00000123684 | LPGAT1       | 1.216335159 | 0.002706175 |
| ENSG00000107165 | TYRP1        | 1.216365961 | 0.0223806   |
| ENSG00000119408 | NEK6         | 1.216386565 | 1.80E-14    |
| ENSG00000149131 | SERPING1     | 1.216426049 | 4.64E-05    |
| ENSG00000167641 | PPP1R14A     | 1.216672396 | 4.71E-05    |

|                 |          |             |             |
|-----------------|----------|-------------|-------------|
| ENSG0000001631  | KRIT1    | 1.21696361  | 0.011245976 |
| ENSG00000120322 | PCDHB8   | 1.217013493 | 0.004664204 |
| ENSG00000180884 | ZNF792   | 1.217100388 | 8.93E-07    |
| ENSG00000115738 | ID2      | 1.217452006 | 0.005332322 |
| ENSG00000142102 | ATHL1    | 1.218130432 | 0.015480157 |
| ENSG00000158079 | PTPDC1   | 1.218192099 | 1.14E-08    |
| ENSG00000197483 | ZNF628   | 1.218198291 | 5.43E-07    |
| ENSG00000112773 | FAM46A   | 1.218312522 | 0.000271713 |
| ENSG00000139410 | SDSL     | 1.218430879 | 2.58E-07    |
| ENSG00000204516 | MICB     | 1.21857743  | 0.000902231 |
| ENSG00000164692 | COL1A2   | 1.218937856 | 0.008357701 |
| ENSG00000109089 | CDR2L    | 1.219214935 | 0.012363829 |
| ENSG00000131831 | RAI2     | 1.219822629 | 0.002022731 |
| ENSG00000196950 | SLC39A10 | 1.219977565 | 1.85E-05    |
| ENSG00000162105 | SHANK2   | 1.220407897 | 4.94E-07    |
| ENSG00000166869 | CHP2     | 1.220452329 | 0.002472858 |
| ENSG00000111799 | COL12A1  | 1.220882511 | 1.28E-09    |
| ENSG00000161048 | NAPEPLD  | 1.221554581 | 6.97E-10    |
| ENSG00000164308 | ERAP2    | 1.221834789 | 0.017295047 |
| ENSG00000181722 | ZBTB20   | 1.221989465 | 3.75E-09    |
| ENSG00000162614 | NEXN     | 1.222197961 | 0.0030862   |
| ENSG00000137965 | IFI44    | 1.222568968 | 0.034137723 |
| ENSG00000146410 | MTFR2    | 1.222680039 | 4.07E-07    |
| ENSG00000074527 | NTN4     | 1.222883744 | 0.000123353 |
| ENSG00000187699 | C2orf88  | 1.222936099 | 0.000342967 |
| ENSG00000078081 | LAMP3    | 1.223184969 | 0.018268468 |
| ENSG00000101115 | SALL4    | 1.223461439 | 5.30E-06    |
| ENSG00000139354 | GAS2L3   | 1.223721591 | 5.74E-05    |
| ENSG00000048462 | TNFRSF17 | 1.223861335 | 0.015157631 |
| ENSG00000111057 | KRT18    | 1.223861712 | 0.00069282  |
| ENSG00000123130 | ACOT9    | 1.224226445 | 3.30E-10    |
| ENSG00000157388 | CACNA1D  | 1.224236736 | 7.16E-09    |
| ENSG00000143375 | CGN      | 1.224716288 | 9.86E-08    |
| ENSG00000107789 | MINPP1   | 1.224969643 | 0.001794594 |
| ENSG00000118707 | TGIF2    | 1.225094723 | 1.54E-07    |
| ENSG00000154511 | FAM69A   | 1.225227876 | 3.27E-08    |
| ENSG00000103089 | FA2H     | 1.225353638 | 0.000299838 |
| ENSG00000013588 | GPRC5A   | 1.225391369 | 0.000693688 |
| ENSG00000188343 | FAM92A1  | 1.225438748 | 4.47E-06    |
| ENSG00000163430 | FSTL1    | 1.225471029 | 2.37E-08    |
| ENSG00000248487 | ABHD14A  | 1.225521358 | 9.80E-10    |
| ENSG00000112852 | PCDHB2   | 1.225686438 | 0.0085754   |
| ENSG00000147202 | DIAPH2   | 1.22640812  | 1.65E-10    |
| ENSG00000173482 | PTPRM    | 1.226574146 | 2.63E-07    |
| ENSG00000136048 | DRAM1    | 1.226795275 | 0.000135056 |
| ENSG00000152359 | POC5     | 1.22731428  | 3.57E-13    |
| ENSG00000181392 | SYNE4    | 1.227411791 | 2.45E-06    |

|                 |          |             |             |
|-----------------|----------|-------------|-------------|
| ENSG00000173221 | GLRX     | 1.227469213 | 0.007717551 |
| ENSG00000053747 | LAMA3    | 1.227926542 | 0.005931912 |
| ENSG00000147381 | MAGEA4   | 1.227964483 | 0.047309962 |
| ENSG00000153234 | NR4A2    | 1.228118981 | 0.015980528 |
| ENSG00000137942 | FNBP1L   | 1.228205993 | 0.00035394  |
| ENSG00000148584 | A1CF     | 1.228271145 | 0.000205864 |
| ENSG00000185905 | C16orf54 | 1.22839865  | 0.03518676  |
| ENSG00000102524 | TNFSF13B | 1.229060492 | 0.000269623 |
| ENSG00000122862 | SRGN     | 1.230086575 | 0.00981771  |
| ENSG00000147454 | SLC25A37 | 1.230308873 | 0.003579751 |
| ENSG00000239382 | ALKBH6   | 1.230530655 | 1.83E-13    |
| ENSG00000180818 | HOXC10   | 1.231091283 | 0.037905923 |
| ENSG00000120875 | DUSP4    | 1.231510637 | 0.031651    |
| ENSG00000162692 | VCAM1    | 1.231588721 | 0.000206933 |
| ENSG00000110195 | FOLR1    | 1.231594896 | 0.011340676 |
| ENSG00000161570 | CCL5     | 1.231654042 | 0.045649348 |
| ENSG00000168502 | SOGA2    | 1.232432748 | 5.18E-05    |
| ENSG00000165376 | CLDN2    | 1.232562839 | 0.000820723 |
| ENSG00000123612 | ACVR1C   | 1.232647055 | 4.57E-05    |
| ENSG00000165140 | FBP1     | 1.232829765 | 0.000944231 |
| ENSG00000183508 | FAM46C   | 1.232966635 | 0.001527783 |
| ENSG00000120149 | MSX2     | 1.233553985 | 4.26E-05    |
| ENSG00000196139 | AKR1C3   | 1.233606611 | 3.83E-09    |
| ENSG00000072422 | RHOBTB1  | 1.233618061 | 0.000563275 |
| ENSG00000106397 | PLOD3    | 1.233654387 | 7.49E-05    |
| ENSG00000163710 | PCOLCE2  | 1.233681937 | 0.002864876 |
| ENSG00000115170 | ACVR1    | 1.23371103  | 2.63E-11    |
| ENSG00000187068 | C3orf70  | 1.234117757 | 8.59E-05    |
| ENSG00000083535 | PIBF1    | 1.234533788 | 2.06E-06    |
| ENSG00000163735 | CXCL5    | 1.234758778 | 0.011113042 |
| ENSG00000090889 | KIF4A    | 1.234928237 | 0.000788975 |
| ENSG00000100985 | MMP9     | 1.23522471  | 0.000504086 |
| ENSG00000198466 | ZNF587   | 1.235230065 | 2.35E-07    |
| ENSG00000103742 | IGDCC4   | 1.235436629 | 0.000142666 |
| ENSG00000167105 | TMEM92   | 1.235501359 | 5.30E-09    |
| ENSG00000115648 | MLPH     | 1.235728365 | 0.000457985 |
| ENSG00000173369 | C1QB     | 1.236559194 | 0.00358773  |
| ENSG00000204604 | ZNF468   | 1.236690079 | 0.002975581 |
| ENSG00000239887 | C1orf226 | 1.236880353 | 6.36E-10    |
| ENSG00000140968 | IRF8     | 1.236968309 | 0.002717425 |
| ENSG00000171428 | NAT1     | 1.237024365 | 0.00924138  |
| ENSG00000154760 | SLFN13   | 1.237058576 | 4.57E-05    |
| ENSG00000140937 | CDH11    | 1.237404827 | 0.003435284 |
| ENSG00000117228 | GBP1     | 1.237595172 | 0.008794519 |
| ENSG00000260027 | HOXB7    | 1.237728355 | 1.10E-05    |
| ENSG00000168386 | FILIP1L  | 1.237860057 | 1.06E-10    |
| ENSG00000197408 | CYP2B6   | 1.237925059 | 0.00038943  |

|                 |          |             |             |
|-----------------|----------|-------------|-------------|
| ENSG00000260916 | CCPG1    | 1.238008986 | 2.17E-10    |
| ENSG00000101104 | PABPC1L  | 1.23807995  | 1.49E-06    |
| ENSG00000145414 | NAF1     | 1.238085287 | 1.02E-06    |
| ENSG00000198681 | MAGEA1   | 1.238883957 | 0.009374697 |
| ENSG00000120756 | PLS1     | 1.238934986 | 0.003873058 |
| ENSG00000136059 | VILL     | 1.239186889 | 0.001880633 |
| ENSG00000166341 | DCHS1    | 1.239218961 | 4.43E-06    |
| ENSG00000168675 | LDLRAD4  | 1.239348387 | 9.40E-07    |
| ENSG00000111012 | CYP27B1  | 1.239677153 | 8.36E-07    |
| ENSG00000168062 | BATF2    | 1.240031069 | 2.65E-07    |
| ENSG00000021826 | CPS1     | 1.240234411 | 0.040422324 |
| ENSG00000134258 | VTCN1    | 1.240408594 | 0.003455342 |
| ENSG00000033170 | FUT8     | 1.24065679  | 0.000455192 |
| ENSG00000119917 | IFIT3    | 1.240956611 | 0.001324669 |
| ENSG00000063587 | ZNF275   | 1.241077401 | 2.08E-07    |
| ENSG00000119125 | GDA      | 1.241747587 | 1.07E-06    |
| ENSG00000105808 | RASA4    | 1.242192203 | 3.21E-06    |
| ENSG00000182134 | TDRKH    | 1.242263809 | 7.44E-07    |
| ENSG00000143387 | CTSK     | 1.242753676 | 1.37E-05    |
| ENSG00000073605 | GSDMB    | 1.242758453 | 0.002598874 |
| ENSG00000185420 | SMYD3    | 1.2432146   | 2.39E-12    |
| ENSG00000110777 | POU2AF1  | 1.243217365 | 0.012847233 |
| ENSG00000187231 | SESTD1   | 1.243314394 | 8.51E-07    |
| ENSG00000177575 | CD163    | 1.243408262 | 6.26E-05    |
| ENSG00000106484 | MEST     | 1.243504367 | 0.000108315 |
| ENSG00000170373 | CST1     | 1.243568191 | 0.046267322 |
| ENSG00000135744 | AGT      | 1.243819937 | 0.011397339 |
| ENSG00000139163 | ETNK1    | 1.243838537 | 0.024429691 |
| ENSG00000139508 | SLC46A3  | 1.244168747 | 0.003799437 |
| ENSG00000142484 | TM4SF5   | 1.245025353 | 0.006233816 |
| ENSG00000089351 | GRAMD1A  | 1.245094568 | 2.22E-11    |
| ENSG00000164484 | TMEM200A | 1.245346165 | 0.000929767 |
| ENSG00000137628 | DDX60    | 1.245505919 | 0.011459818 |
| ENSG00000046604 | DSG2     | 1.245594372 | 0.002515846 |
| ENSG00000129003 | VPS13C   | 1.246018441 | 0.007649572 |
| ENSG00000164758 | MED30    | 1.246341828 | 8.01E-09    |
| ENSG00000179715 | PCED1B   | 1.24653126  | 1.60E-05    |
| ENSG00000125207 | PIWIL1   | 1.246620199 | 0.000235637 |
| ENSG00000198788 | MUC2     | 1.247144168 | 0.001638066 |
| ENSG00000147324 | MFHAS1   | 1.247173853 | 0.003612086 |
| ENSG00000106868 | SUSD1    | 1.247287687 | 7.94E-12    |
| ENSG00000146674 | IGFBP3   | 1.247318238 | 0.00012454  |
| ENSG00000106624 | AEBP1    | 1.248157281 | 1.47E-07    |
| ENSG00000157827 | FMNL2    | 1.248419642 | 5.02E-13    |
| ENSG00000173905 | GOLIM4   | 1.248879885 | 3.73E-09    |
| ENSG00000115271 | GCA      | 1.249109224 | 0.001887327 |
| ENSG00000038427 | VCAN     | 1.249191295 | 0.003757992 |

|                 |            |             |             |
|-----------------|------------|-------------|-------------|
| ENSG00000135914 | HTR2B      | 1.249312465 | 0.027845164 |
| ENSG00000115718 | PROC       | 1.250268262 | 9.30E-08    |
| ENSG00000149557 | FEZ1       | 1.250329814 | 3.66E-06    |
| ENSG00000132846 | ZBED3      | 1.250403915 | 9.72E-10    |
| ENSG00000124074 | ENKD1      | 1.25047537  | 9.31E-11    |
| ENSG00000005187 | ACSM3      | 1.250749789 | 0.000882669 |
| ENSG00000137960 | GIPC2      | 1.250808706 | 0.003455141 |
| ENSG00000154978 | VOPP1      | 1.25100831  | 0.000854547 |
| ENSG00000090104 | RGS1       | 1.251138672 | 0.034912928 |
| ENSG00000106819 | ASPN       | 1.253110783 | 0.019807314 |
| ENSG00000175928 | LRRN1      | 1.253825823 | 0.014006988 |
| ENSG00000102265 | TIMP1      | 1.254428363 | 0.000196396 |
| ENSG00000181104 | F2R        | 1.254648982 | 0.016848613 |
| ENSG00000171877 | FRMD5      | 1.254739457 | 2.33E-08    |
| ENSG00000130208 | APOC1      | 1.256557092 | 0.009221829 |
| ENSG00000172023 | REG1B      | 1.257660942 | 0.03281041  |
| ENSG00000005073 | HOXA11     | 1.258316577 | 7.12E-07    |
| ENSG00000112208 | BAG2       | 1.25870129  | 2.29E-06    |
| ENSG00000144136 | SLC20A1    | 1.25952994  | 0.000104848 |
| ENSG00000164649 | CDCA7L     | 1.259793138 | 9.84E-16    |
| ENSG00000116962 | NID1       | 1.260566919 | 1.36E-05    |
| ENSG00000182986 | ZNF320     | 1.260846014 | 1.94E-12    |
| ENSG00000126603 | GLIS2      | 1.261332909 | 8.07E-09    |
| ENSG00000143228 | NUF2       | 1.262622377 | 5.55E-06    |
| ENSG00000100097 | LGALS1     | 1.263588671 | 1.57E-09    |
| ENSG00000162695 | SLC30A7    | 1.26643241  | 1.71E-14    |
| ENSG00000180525 | PRR26      | 1.266834515 | 5.57E-11    |
| ENSG00000187715 | KBTD12     | 1.267895629 | 0.000735078 |
| ENSG00000204442 | FAM155A    | 1.268519875 | 0.001039663 |
| ENSG00000229689 | AC009237.8 | 1.269098322 | 2.09E-09    |
| ENSG00000166741 | NNMT       | 1.269484632 | 0.003092201 |
| ENSG00000111700 | SLCO1B3    | 1.270006867 | 0.003846315 |
| ENSG00000137198 | GMPR       | 1.270220574 | 2.69E-05    |
| ENSG00000179388 | EGR3       | 1.270407307 | 0.000395941 |
| ENSG00000157870 | FAM213B    | 1.270587585 | 3.16E-12    |
| ENSG00000197888 | UGT2B17    | 1.27136291  | 0.042713436 |
| ENSG00000125848 | FLRT3      | 1.271870639 | 0.041150409 |
| ENSG00000163297 | ANTXR2     | 1.272150358 | 8.88E-07    |
| ENSG00000123500 | COL10A1    | 1.272167505 | 0.000282734 |
| ENSG00000007038 | PRSS21     | 1.272432337 | 4.73E-05    |
| ENSG00000166147 | FBN1       | 1.273033747 | 1.09E-06    |
| ENSG00000172458 | IL17D      | 1.27316409  | 6.06E-08    |
| ENSG00000254087 | LYN        | 1.273585034 | 0.001305962 |
| ENSG00000196136 | SERPINA3   | 1.273913903 | 0.010638369 |
| ENSG00000112742 | TTK        | 1.274765601 | 0.004164503 |
| ENSG00000059378 | PARP12     | 1.275374707 | 0.000497674 |
| ENSG00000085276 | MECOM      | 1.275741663 | 0.001231877 |

|                 |          |             |             |
|-----------------|----------|-------------|-------------|
| ENSG00000160181 | TFF2     | 1.276315731 | 0.017841861 |
| ENSG00000167183 | PRR15L   | 1.276420815 | 0.000470719 |
| ENSG00000134240 | HMGCS2   | 1.27683939  | 0.001096252 |
| ENSG00000113212 | PCDHB7   | 1.276849839 | 0.000422113 |
| ENSG00000126709 | IFI6     | 1.276945967 | 0.007445835 |
| ENSG00000136160 | EDNRB    | 1.277034543 | 3.80E-07    |
| ENSG00000159445 | THEM4    | 1.27754214  | 1.01E-12    |
| ENSG00000185864 | NPIP4    | 1.277574574 | 3.59E-05    |
| ENSG00000008517 | IL32     | 1.278182997 | 0.000155971 |
| ENSG00000139329 | LUM      | 1.278277646 | 0.00466463  |
| ENSG00000109099 | PMP22    | 1.278528132 | 3.18E-07    |
| ENSG00000130303 | BST2     | 1.279831343 | 0.000472217 |
| ENSG00000151882 | CCL28    | 1.280335021 | 1.17E-05    |
| ENSG00000054219 | LY75     | 1.280342859 | 0.007656409 |
| ENSG00000125398 | SOX9     | 1.28040445  | 0.000884148 |
| ENSG00000163737 | PF4      | 1.281203086 | 0.001307339 |
| ENSG00000172244 | C5orf34  | 1.281741256 | 4.05E-05    |
| ENSG00000075420 | FNDC3B   | 1.281784377 | 0.000926375 |
| ENSG00000166415 | WDR72    | 1.282859056 | 3.26E-06    |
| ENSG00000188488 | SERPINA5 | 1.283057127 | 0.0030574   |
| ENSG00000162772 | ATF3     | 1.283792699 | 0.015361036 |
| ENSG00000163739 | CXCL1    | 1.284271159 | 0.003363695 |
| ENSG00000145569 | FAM105A  | 1.284757507 | 1.03E-05    |
| ENSG00000109084 | TMEM97   | 1.285665392 | 0.000377182 |
| ENSG00000143476 | DTL      | 1.285946382 | 0.003878009 |
| ENSG00000196371 | FUT4     | 1.287008628 | 0.002761494 |
| ENSG00000132031 | MATN3    | 1.288228702 | 1.15E-05    |
| ENSG00000138449 | SLC40A1  | 1.288262239 | 9.36E-11    |
| ENSG00000164694 | FNDC1    | 1.28826532  | 0.000438118 |
| ENSG00000177685 | EFCAB4A  | 1.288411128 | 7.88E-07    |
| ENSG00000204257 | HLA-DMA  | 1.288953199 | 0.000213956 |
| ENSG00000137726 | FXD6     | 1.288961502 | 0.000234304 |
| ENSG00000163001 | CCDC104  | 1.289504832 | 5.92E-14    |
| ENSG00000115616 | SLC9A2   | 1.28965153  | 5.09E-05    |
| ENSG00000078399 | HOXA9    | 1.289808495 | 0.002897992 |
| ENSG00000068079 | IFI35    | 1.29030096  | 0.000196665 |
| ENSG00000165659 | DACH1    | 1.290370207 | 0.000725006 |
| ENSG00000196620 | UGT2B15  | 1.29056401  | 0.002670173 |
| ENSG00000009765 | IYD      | 1.291364511 | 5.83E-06    |
| ENSG00000196091 | MYBPC1   | 1.292045883 | 0.007819174 |
| ENSG00000069764 | PLA2G10  | 1.292340612 | 0.002297321 |
| ENSG00000101350 | KIF3B    | 1.292837967 | 3.58E-05    |
| ENSG00000081923 | ATP8B1   | 1.292908431 | 0.00064712  |
| ENSG00000139629 | GALNT6   | 1.293467873 | 0.000167804 |
| ENSG00000143891 | GALM     | 1.293546583 | 6.49E-11    |
| ENSG00000240065 | PSMB9    | 1.294605979 | 0.00030339  |
| ENSG00000151612 | ZNF827   | 1.296531598 | 8.74E-11    |

|                 |          |             |             |
|-----------------|----------|-------------|-------------|
| ENSG00000165807 | PPP1R36  | 1.296920317 | 2.62E-07    |
| ENSG00000174938 | SEZ6L2   | 1.297102934 | 0.000523428 |
| ENSG00000151491 | EPS8     | 1.29729272  | 0.002966293 |
| ENSG00000137273 | FOXF2    | 1.298426895 | 2.37E-06    |
| ENSG00000021488 | SLC7A9   | 1.298771444 | 0.000453467 |
| ENSG00000120324 | PCDHB10  | 1.298974316 | 9.51E-05    |
| ENSG00000138646 | HERC5    | 1.299477758 | 0.000441897 |
| ENSG00000103485 | QPRT     | 1.299677088 | 5.68E-05    |
| ENSG00000072657 | TRHDE    | 1.300473953 | 0.001049527 |
| ENSG00000130429 | ARPC1B   | 1.300560711 | 4.82E-06    |
| ENSG00000116771 | AGMAT    | 1.300696468 | 1.05E-09    |
| ENSG00000183960 | KCNH8    | 1.30237207  | 3.85E-05    |
| ENSG00000178301 | AQP11    | 1.304190893 | 3.00E-08    |
| ENSG00000162702 | ZNF281   | 1.304208522 | 2.37E-14    |
| ENSG00000080031 | PTPRH    | 1.304571361 | 3.74E-05    |
| ENSG00000179750 | APOBEC3B | 1.304622094 | 0.001349795 |
| ENSG00000129038 | LOXL1    | 1.305675976 | 3.55E-09    |
| ENSG00000134326 | CMPK2    | 1.306111481 | 7.25E-06    |
| ENSG00000047457 | CP       | 1.306739277 | 0.001685506 |
| ENSG00000119547 | ONECUT2  | 1.306886293 | 8.78E-06    |
| ENSG00000204262 | COL5A2   | 1.30716659  | 0.002576665 |
| ENSG00000103241 | FOXF1    | 1.307726061 | 3.23E-06    |
| ENSG00000164125 | FAM198B  | 1.307948547 | 8.22E-09    |
| ENSG00000166173 | LARP6    | 1.308213179 | 3.74E-06    |
| ENSG00000241186 | TDGF1    | 1.308922308 | 0.001261928 |
| ENSG00000253293 | HOXA10   | 1.309264302 | 0.00437809  |
| ENSG00000105852 | PON3     | 1.309651989 | 1.38E-06    |
| ENSG00000133321 | RARRES3  | 1.309932727 | 0.000458217 |
| ENSG00000187608 | ISG15    | 1.31051311  | 0.00035976  |
| ENSG00000182957 | SPATA13  | 1.31063591  | 3.14E-11    |
| ENSG00000102854 | MSLN     | 1.310679837 | 0.013742581 |
| ENSG00000164949 | GEM      | 1.311101019 | 3.11E-07    |
| ENSG00000016082 | ISL1     | 1.311490137 | 0.003320943 |
| ENSG00000174567 | GOLT1A   | 1.312285684 | 1.66E-08    |
| ENSG00000129824 | RPS4Y1   | 1.313528785 | 0.003141633 |
| ENSG00000106565 | TMEM176B | 1.313908982 | 0.000449983 |
| ENSG00000181350 | FAM211A  | 1.314613121 | 1.73E-07    |
| ENSG00000133962 | CATSPERB | 1.314675012 | 0.000110689 |
| ENSG00000108960 | MMD      | 1.315138975 | 5.55E-14    |
| ENSG00000111490 | TBC1D30  | 1.316822435 | 1.25E-08    |
| ENSG00000122691 | TWIST1   | 1.31787706  | 3.11E-07    |
| ENSG00000170421 | KRT8     | 1.318145575 | 2.64E-06    |
| ENSG00000196963 | PCDHB16  | 1.318509268 | 0.000196659 |
| ENSG00000185551 | NR2F2    | 1.318645543 | 6.67E-09    |
| ENSG00000176907 | C8orf4   | 1.318876755 | 0.014447066 |
| ENSG00000147010 | SH3KBP1  | 1.319021347 | 7.39E-12    |
| ENSG00000067715 | SYT1     | 1.319236972 | 0.00108889  |

|                 |          |             |             |
|-----------------|----------|-------------|-------------|
| ENSG00000180806 | HOXC9    | 1.319826563 | 3.42E-06    |
| ENSG00000181381 | DDX60L   | 1.319958107 | 9.17E-08    |
| ENSG00000137673 | MMP7     | 1.320852007 | 0.008849023 |
| ENSG00000150556 | LYPD6B   | 1.321535896 | 5.85E-06    |
| ENSG00000176387 | HSD11B2  | 1.321577098 | 5.99E-05    |
| ENSG00000076641 | PAG1     | 1.321593364 | 4.89E-11    |
| ENSG00000163817 | SLC6A20  | 1.321957282 | 9.68E-05    |
| ENSG00000156234 | CXCL13   | 1.322266079 | 0.018340034 |
| ENSG00000243449 | C4orf48  | 1.322513402 | 2.67E-07    |
| ENSG00000196502 | SULT1A1  | 1.322952392 | 0.000319468 |
| ENSG00000135747 | ZNF670   | 1.324568184 | 1.84E-10    |
| ENSG00000165862 | PNLIPRP2 | 1.324839864 | 0.018824859 |
| ENSG00000023445 | BIRC3    | 1.325369001 | 0.007210663 |
| ENSG00000129682 | FGF13    | 1.325734344 | 0.000726857 |
| ENSG00000122877 | EGR2     | 1.325978768 | 0.014832331 |
| ENSG00000112303 | VNN2     | 1.327012285 | 0.004872952 |
| ENSG00000163879 | DNALI1   | 1.327155812 | 1.02E-06    |
| ENSG00000183091 | NEB      | 1.327454115 | 0.000200827 |
| ENSG00000213160 | KLHL23   | 1.328023911 | 7.71E-12    |
| ENSG00000243709 | LEFTY1   | 1.328204532 | 0.00268052  |
| ENSG00000119042 | SATB2    | 1.32874791  | 9.12E-07    |
| ENSG00000153551 | CMTM7    | 1.329307051 | 1.03E-11    |
| ENSG00000136158 | SPRY2    | 1.329870357 | 6.89E-08    |
| ENSG00000233041 | PHGR1    | 1.330981737 | 0.002339203 |
| ENSG00000162639 | HENMT1   | 1.331152896 | 2.29E-12    |
| ENSG00000106538 | RARRES2  | 1.332150436 | 4.56E-09    |
| ENSG00000178826 | TMEM139  | 1.3335761   | 2.72E-08    |
| ENSG00000160862 | AZGP1    | 1.333705593 | 6.76E-06    |
| ENSG00000143341 | HMCN1    | 1.33372749  | 0.000309472 |
| ENSG00000187479 | C11orf96 | 1.334129662 | 2.54E-14    |
| ENSG00000120327 | PCDHB14  | 1.33494751  | 1.08E-05    |
| ENSG00000178882 | FAM101A  | 1.335243233 | 1.24E-05    |
| ENSG00000204616 | TRIM31   | 1.337674938 | 0.007417474 |
| ENSG00000170345 | FOS      | 1.337853687 | 1.77E-05    |
| ENSG00000087245 | MMP2     | 1.338515184 | 9.47E-09    |
| ENSG00000140297 | GCNT3    | 1.339177909 | 0.001844349 |
| ENSG00000112796 | ENPP5    | 1.33953224  | 0.00053817  |
| ENSG00000116574 | RHOU     | 1.33964273  | 2.49E-10    |
| ENSG00000132329 | RAMP1    | 1.340828817 | 1.06E-07    |
| ENSG00000146376 | ARHGAP18 | 1.341445254 | 1.71E-13    |
| ENSG00000081041 | CXCL2    | 1.34170387  | 0.001687456 |
| ENSG00000134028 | ADAMDEC1 | 1.341864733 | 9.52E-05    |
| ENSG00000092758 | COL9A3   | 1.343131952 | 1.48E-05    |
| ENSG00000115290 | GRB14    | 1.343595658 | 4.37E-05    |
| ENSG00000117472 | TSPAN1   | 1.344190582 | 0.00076241  |
| ENSG00000178828 | RNF186   | 1.344996721 | 8.47E-08    |
| ENSG00000125384 | PTGER2   | 1.345241277 | 4.63E-05    |

|                 |          |             |             |
|-----------------|----------|-------------|-------------|
| ENSG00000155893 | ACPL2    | 1.345466367 | 2.10E-12    |
| ENSG00000152078 | TMEM56   | 1.345556588 | 1.82E-07    |
| ENSG00000086696 | HSD17B2  | 1.345637596 | 0.013930698 |
| ENSG00000198542 | ITGBL1   | 1.34625627  | 6.92E-05    |
| ENSG00000103187 | COTL1    | 1.346614726 | 0.000161439 |
| ENSG00000186314 | PRELID2  | 1.3472137   | 2.99E-14    |
| ENSG00000111701 | APOBEC1  | 1.347585658 | 4.26E-05    |
| ENSG00000186603 | HPDL     | 1.348974919 | 1.21E-09    |
| ENSG00000149150 | SLC43A1  | 1.349567878 | 9.48E-07    |
| ENSG00000164294 | GPX8     | 1.349707998 | 3.40E-07    |
| ENSG00000115414 | FN1      | 1.349773448 | 9.12E-08    |
| ENSG00000135048 | TMEM2    | 1.350887722 | 6.42E-06    |
| ENSG00000172264 | MACROD2  | 1.351044911 | 0.000201589 |
| ENSG00000159556 | ISL2     | 1.351476717 | 5.17E-08    |
| ENSG00000176595 | KBTBD11  | 1.351546215 | 2.52E-05    |
| ENSG00000103021 | CCDC113  | 1.352077094 | 3.39E-05    |
| ENSG00000172716 | SLFN11   | 1.352421963 | 5.49E-08    |
| ENSG00000123838 | C4BPA    | 1.352432351 | 0.000370275 |
| ENSG00000163577 | EIF5A2   | 1.35364986  | 8.85E-06    |
| ENSG00000258818 | RNASE4   | 1.353865213 | 1.78E-08    |
| ENSG00000177459 | C8orf47  | 1.354128851 | 9.79E-05    |
| ENSG00000088992 | TESC     | 1.354622279 | 0.000479251 |
| ENSG00000159212 | CLIC6    | 1.354866482 | 1.10E-05    |
| ENSG00000140416 | TPM1     | 1.356617959 | 1.40E-09    |
| ENSG00000149968 | MMP3     | 1.356828428 | 0.035468636 |
| ENSG00000162769 | FLVCR1   | 1.357005346 | 2.54E-12    |
| ENSG00000146166 | LGSN     | 1.35705805  | 0.002298776 |
| ENSG00000133135 | RNF128   | 1.357813537 | 0.000596812 |
| ENSG00000127831 | VIL1     | 1.358163065 | 0.006009757 |
| ENSG00000160188 | RSPH1    | 1.358355122 | 5.01E-10    |
| ENSG00000043355 | ZIC2     | 1.358461543 | 0.003863428 |
| ENSG00000124233 | SEMG1    | 1.359875879 | 0.003371031 |
| ENSG00000186854 | TRABD2A  | 1.360660537 | 3.23E-07    |
| ENSG00000165215 | CLDN3    | 1.361053673 | 0.0255254   |
| ENSG00000113924 | HGD      | 1.362448711 | 7.02E-09    |
| ENSG00000179674 | ARL14    | 1.364537219 | 0.006078635 |
| ENSG00000111885 | MAN1A1   | 1.36582484  | 7.83E-12    |
| ENSG00000145703 | IQGAP2   | 1.365949166 | 0.002279117 |
| ENSG00000184434 | LRRC19   | 1.366486974 | 0.002918318 |
| ENSG00000114346 | ECT2     | 1.367296184 | 0.001396667 |
| ENSG00000211899 | IGHM     | 1.367338913 | 0.00508573  |
| ENSG00000213949 | ITGA1    | 1.36749758  | 5.53E-08    |
| ENSG00000164749 | HNF4G    | 1.36840844  | 2.67E-09    |
| ENSG00000182747 | SLC35D3  | 1.368542906 | 0.004653272 |
| ENSG00000166143 | PPP1R14D | 1.368807925 | 4.78E-07    |
| ENSG00000253958 | CLDN23   | 1.369904341 | 1.07E-07    |
| ENSG00000073792 | IGF2BP2  | 1.370482851 | 1.14E-05    |

|                 |          |             |             |
|-----------------|----------|-------------|-------------|
| ENSG00000091136 | LAMB1    | 1.370846438 | 3.13E-11    |
| ENSG00000151623 | NR3C2    | 1.371210535 | 6.16E-06    |
| ENSG00000180340 | FZD2     | 1.371374571 | 1.50E-06    |
| ENSG00000106483 | SFRP4    | 1.372329573 | 0.000327274 |
| ENSG00000049449 | RCN1     | 1.372532608 | 1.56E-05    |
| ENSG00000256061 | DYX1C1   | 1.372723784 | 2.80E-06    |
| ENSG00000096088 | PGC      | 1.373354823 | 0.039319945 |
| ENSG00000019505 | SYT13    | 1.374228926 | 6.10E-07    |
| ENSG00000151135 | C12orf23 | 1.374467702 | 9.04E-14    |
| ENSG00000175130 | MARCKSL1 | 1.376538825 | 4.49E-06    |
| ENSG00000118523 | CTGF     | 1.376961507 | 2.15E-08    |
| ENSG00000168734 | PKIG     | 1.377352762 | 1.02E-10    |
| ENSG00000075223 | SEMA3C   | 1.377414738 | 2.38E-06    |
| ENSG00000162078 | ZG16B    | 1.378688514 | 1.19E-05    |
| ENSG00000188959 | C9orf152 | 1.380079839 | 3.83E-08    |
| ENSG00000197635 | DPP4     | 1.381011541 | 1.37E-06    |
| ENSG00000170293 | CMTM8    | 1.38125723  | 3.56E-12    |
| ENSG00000100079 | LGALS2   | 1.382488131 | 0.040505179 |
| ENSG00000221944 | TIGD1    | 1.383904472 | 4.36E-08    |
| ENSG00000133110 | POSTN    | 1.383934265 | 0.003339943 |
| ENSG00000133106 | EPST11   | 1.384215869 | 2.26E-08    |
| ENSG00000101842 | VSIG1    | 1.38474417  | 0.001494802 |
| ENSG00000144810 | COL8A1   | 1.385969537 | 1.68E-05    |
| ENSG00000122711 | SPINK4   | 1.386040904 | 0.000300459 |
| ENSG00000157214 | STEAP2   | 1.389625667 | 1.50E-09    |
| ENSG00000132465 | IGJ      | 1.390544243 | 0.02165097  |
| ENSG00000171714 | ANO5     | 1.391763921 | 7.26E-06    |
| ENSG00000137959 | IFI44L   | 1.392949159 | 0.000725967 |
| ENSG00000187908 | DMBT1    | 1.393280774 | 0.014338493 |
| ENSG00000175538 | KCNE3    | 1.393916353 | 3.36E-08    |
| ENSG00000178878 | APOLD1   | 1.394219919 | 7.81E-13    |
| ENSG00000120306 | CYSTM1   | 1.394471611 | 1.96E-10    |
| ENSG00000198944 | SOWAHA   | 1.394620751 | 1.37E-07    |
| ENSG00000106560 | GIMAP2   | 1.394873454 | 2.44E-08    |
| ENSG00000139292 | LGR5     | 1.396120245 | 0.000221187 |
| ENSG00000164542 | KIAA0895 | 1.396303013 | 5.99E-07    |
| ENSG00000165617 | DACT1    | 1.397225223 | 1.65E-08    |
| ENSG00000091490 | SEL1L3   | 1.397780261 | 2.24E-05    |
| ENSG00000139737 | SLAIN1   | 1.401453409 | 1.69E-05    |
| ENSG00000146038 | DCDC2    | 1.401472578 | 3.38E-07    |
| ENSG00000198189 | HSD17B11 | 1.40358092  | 0.000138482 |
| ENSG00000173702 | MUC13    | 1.409196011 | 0.000430533 |
| ENSG00000118785 | SPP1     | 1.409937744 | 0.000425024 |
| ENSG00000107249 | GLIS3    | 1.410497517 | 1.32E-08    |
| ENSG00000090382 | LYZ      | 1.410781302 | 0.001083768 |
| ENSG00000125999 | BPIFB1   | 1.412372579 | 0.000763536 |
| ENSG00000150893 | FREM2    | 1.415944354 | 0.000503134 |

|                 |          |             |             |
|-----------------|----------|-------------|-------------|
| ENSG00000169435 | RASSF6   | 1.417737285 | 1.27E-09    |
| ENSG00000104635 | SLC39A14 | 1.419490681 | 6.33E-05    |
| ENSG00000198832 | SELM     | 1.420459363 | 2.70E-08    |
| ENSG00000188993 | LRRC66   | 1.423335876 | 6.98E-06    |
| ENSG00000143167 | GPA33    | 1.425283038 | 0.000103547 |
| ENSG00000104783 | KCNN4    | 1.425284176 | 1.42E-06    |
| ENSG00000164292 | RHOBTB3  | 1.42986232  | 1.92E-08    |
| ENSG00000140682 | TGFB111  | 1.432120438 | 9.06E-09    |
| ENSG00000169903 | TM4SF4   | 1.432765867 | 0.000394942 |
| ENSG00000137501 | SYTL2    | 1.433827457 | 8.21E-10    |
| ENSG00000163586 | FABP1    | 1.434975567 | 0.030769399 |
| ENSG00000151025 | GPR158   | 1.435119045 | 2.26E-06    |
| ENSG00000124253 | PCK1     | 1.438706177 | 0.002514533 |
| ENSG00000091138 | SLC26A3  | 1.440149833 | 0.008155473 |
| ENSG00000168955 | TM4SF20  | 1.441202838 | 0.014566098 |
| ENSG00000168679 | SLC16A4  | 1.441868013 | 1.56E-05    |
| ENSG00000115386 | REG1A    | 1.441973705 | 0.000349759 |
| ENSG00000007062 | PROM1    | 1.443101903 | 0.012343007 |
| ENSG00000138294 | MSMB     | 1.444790036 | 0.004139819 |
| ENSG00000196335 | STK31    | 1.446344865 | 1.05E-10    |
| ENSG00000188175 | HEPACAM2 | 1.4480741   | 0.000992611 |
| ENSG00000081803 | CADPS2   | 1.448313096 | 2.29E-15    |
| ENSG00000171431 | KRT20    | 1.449373365 | 0.047511996 |
| ENSG00000165434 | PGM2L1   | 1.452661436 | 1.07E-10    |
| ENSG00000166825 | ANPEP    | 1.452875008 | 0.030646717 |
| ENSG00000104537 | ANXA13   | 1.452890353 | 1.19E-05    |
| ENSG00000172031 | EPHX4    | 1.454161919 | 7.23E-05    |
| ENSG00000175556 | LONRF3   | 1.455080221 | 3.17E-12    |
| ENSG00000112379 | KIAA1244 | 1.456848009 | 6.16E-13    |
| ENSG00000134193 | REG4     | 1.457595205 | 8.60E-06    |
| ENSG00000160183 | TMPRSS3  | 1.461153515 | 0.000378933 |
| ENSG00000166923 | GREM1    | 1.468013193 | 0.000810681 |
| ENSG00000079112 | CDH17    | 1.479255899 | 0.004384715 |
| ENSG00000173890 | GPR160   | 1.48082616  | 1.63E-09    |
| ENSG00000170647 | TMEM133  | 1.483364467 | 1.75E-13    |
| ENSG00000174827 | PDZK1    | 1.483373738 | 0.00020915  |
| ENSG00000157315 | TMED6    | 1.483470023 | 8.94E-06    |
| ENSG00000001561 | ENPP4    | 1.486296943 | 3.44E-13    |
| ENSG00000070019 | GUCY2C   | 1.487512875 | 0.0002377   |
| ENSG00000235162 | C12orf75 | 1.487548023 | 2.42E-19    |
| ENSG00000164920 | OSR2     | 1.487615373 | 2.28E-11    |
| ENSG00000066405 | CLDN18   | 1.490966083 | 0.004589062 |
| ENSG00000183840 | GPR39    | 1.492520461 | 2.18E-13    |
| ENSG00000163072 | NOSTRIN  | 1.494365223 | 7.22E-10    |
| ENSG00000106031 | HOXA13   | 1.494668902 | 9.67E-06    |
| ENSG00000162896 | PIGR     | 1.496975564 | 9.37E-09    |
| ENSG00000153714 | LURAP1L  | 1.499594432 | 1.39E-14    |

|                 |          |             |             |
|-----------------|----------|-------------|-------------|
| ENSG00000166582 | CENPV    | 1.504475276 | 2.21E-12    |
| ENSG00000170439 | METTL7B  | 1.504865849 | 1.02E-10    |
| ENSG00000115009 | CCL20    | 1.505993862 | 0.003668454 |
| ENSG00000198535 | C2CD4A   | 1.507274107 | 3.81E-07    |
| ENSG00000101333 | PLCB4    | 1.508120063 | 2.25E-08    |
| ENSG00000178401 | DNAJC22  | 1.508260249 | 1.52E-11    |
| ENSG00000124602 | UNC5CL   | 1.509220017 | 3.20E-09    |
| ENSG00000179914 | ITLN1    | 1.511817192 | 0.000572706 |
| ENSG00000095932 | C19orf77 | 1.512319287 | 8.58E-08    |
| ENSG00000134627 | PIWIL4   | 1.517457533 | 1.12E-13    |
| ENSG00000196188 | CTSE     | 1.517545112 | 8.56E-05    |
| ENSG00000203697 | CAPN8    | 1.518985973 | 1.89E-06    |
| ENSG00000164283 | ESM1     | 1.525153199 | 7.52E-07    |
| ENSG00000112299 | VNN1     | 1.529372118 | 0.019615593 |
| ENSG00000131771 | PPP1R1B  | 1.530704991 | 2.12E-05    |
| ENSG00000163734 | CXCL3    | 1.536846229 | 0.003876808 |
| ENSG00000127990 | SGCE     | 1.538297998 | 8.57E-09    |
| ENSG00000144820 | GPR128   | 1.538412882 | 5.98E-05    |
| ENSG00000124249 | KCNK15   | 1.540922546 | 1.25E-05    |
| ENSG00000100473 | COCH     | 1.541114217 | 1.69E-07    |
| ENSG00000109511 | ANXA10   | 1.543586616 | 0.004057694 |
| ENSG00000164237 | CMBL     | 1.544405445 | 1.27E-16    |
| ENSG00000166922 | SCG5     | 1.545362695 | 8.92E-07    |
| ENSG00000087916 | SLC6A14  | 1.546000144 | 0.005208719 |
| ENSG00000114248 | LRRC31   | 1.547420413 | 1.94E-07    |
| ENSG00000162878 | PKDCC    | 1.548244818 | 1.16E-14    |
| ENSG00000002726 | AOC1     | 1.566633344 | 0.001285873 |
| ENSG00000103460 | TOX3     | 1.568218178 | 0.001960232 |
| ENSG00000204385 | SLC44A4  | 1.572019788 | 5.12E-05    |
| ENSG00000152128 | TMEM163  | 1.575399315 | 7.18E-10    |
| ENSG00000213401 | MAGEA12  | 1.577531378 | 0.001173873 |
| ENSG00000111341 | MGP      | 1.578045629 | 3.58E-08    |
| ENSG00000087303 | NID2     | 1.581959006 | 3.88E-10    |
| ENSG00000160180 | TFF3     | 1.583737023 | 1.95E-08    |
| ENSG00000122641 | INHBA    | 1.585667999 | 5.96E-10    |
| ENSG00000124225 | PMEPA1   | 1.586002198 | 5.38E-11    |
| ENSG00000135052 | GOLM1    | 1.593707194 | 5.02E-05    |
| ENSG00000112818 | MEP1A    | 1.606814263 | 0.000230657 |
| ENSG00000176532 | PRR15    | 1.613018077 | 8.12E-16    |
| ENSG00000197249 | SERPINA1 | 1.619796257 | 0.000740395 |
| ENSG00000180730 | SHISA2   | 1.634245738 | 5.02E-05    |
| ENSG00000170608 | FOXA3    | 1.635758163 | 1.62E-10    |
| ENSG00000136052 | SLC41A2  | 1.649763006 | 3.03E-12    |
| ENSG00000119888 | EPCAM    | 1.663107456 | 3.05E-06    |
| ENSG00000141448 | GATA6    | 1.664627345 | 0.000210284 |
| ENSG00000198203 | SULT1C2  | 1.664996657 | 5.24E-06    |
| ENSG00000106541 | AGR2     | 1.666835876 | 9.46E-05    |

|                 |         |             |             |
|-----------------|---------|-------------|-------------|
| ENSG00000160182 | TFF1    | 1.672918084 | 0.000106474 |
| ENSG00000090402 | SI      | 1.702799921 | 0.002193284 |
| ENSG00000204019 | CT83    | 1.776247147 | 4.96E-05    |
| ENSG00000171747 | LGALS4  | 1.822002262 | 1.25E-06    |
| ENSG00000103534 | TMC5    | 1.860342136 | 0.000107488 |
| ENSG00000164266 | SPINK1  | 1.861006549 | 0.000717333 |
| ENSG00000196611 | MMP1    | 1.86176897  | 0.001563124 |
| ENSG00000099256 | PRTFDC1 | 1.872815034 | 6.17E-17    |
| ENSG00000127324 | TSPAN8  | 1.925507161 | 0.00011473  |
| ENSG00000131941 | RHPN2   | 2.034798271 | 1.12E-15    |
| ENSG00000164932 | CTHRC1  | 2.060930722 | 5.91E-16    |
| ENSG00000173467 | AGR3    | 2.139381528 | 7.66E-12    |
| ENSG00000102837 | OLFM4   | 2.14332129  | 0.001160082 |
| ENSG00000180745 | CLRN3   | 2.375464641 | 6.52E-12    |

---
