# Supplementary material for: Identification of a lncRNA involved functional module for esophageal cancer subtypes
Source: Royal Society of Chemistry journal article supplement (doi:10.1039/c6mb00101g), 2016-08-05
Supplement: c6mb00101g4.pdf [file c6mb00101g4.pdf]

Supplementary Table 3. Results of scoring modules.

| Modules | DES of LncRNAs | ESS of LncRNAs | DES of PCGs | ESS of PCGs | MIS at LncRNA level | MIS at PCG level | Tissue specificity |
|---------|----------------|----------------|-------------|-------------|---------------------|------------------|--------------------|
| 1       | 0.197967349    | 0.529411765    | 0.126716383 | 0.355498721 | 0.104806244         | 0.045047512      | ESCC               |
| 2       | 0.148384584    | 0.4            | 0.143905356 | 0.351190476 | 0.059353834         | 0.050538191      | ESCC               |
| 3       | 0.16473563     | 0.444444444    | 0.097868058 | 0.322404372 | 0.073215836         | 0.03155309       | ESCC               |
| 4       | 0.128809596    | 0.428571429    | 0.097737543 | 0.358208955 | 0.055204113         | 0.035010463      | ESCC               |
| 5       | 0.134400017    | 0.5            | 0.140789975 | 0.31884058  | 0.067200008         | 0.044889557      | ESCC               |
| 6       | 0.124497425    | 0.384615385    | 0.132269063 | 0.329787234 | 0.047883625         | 0.043620649      | ESCC               |
| 7       | 0.040988882    | 1              | 0.084682696 | 0.384615385 | 0.040988882         | 0.032570268      | ESCC               |
| 8       | 0.151132188    | 0.4            | 0.137344407 | 0.347222222 | 0.060452875         | 0.04768903       | ESCC               |
| 9       | 0.183556901    | 0.5            | 0.101954472 | 0.350364964 | 0.091778451         | 0.035721275      | ESCC               |
| 10      | 0.056794391    | 0.433962264    | 0.054807607 | 0.441117764 | 0.024646623         | 0.024176609      | ESCC               |
| 11      | 0.171087671    | 0.428571429    | 0.097045995 | 0.322222222 | 0.073323288         | 0.031270376      | ESCC               |
| 12      | 0.156779371    | 0.35           | 0.106142398 | 0.301886792 | 0.05487278          | 0.032042988      | ESCC               |
| 13      | 0.129158098    | 0.428571429    | 0.099809974 | 0.358974359 | 0.055353471         | 0.035829222      | ESCC               |
| 14      | 0.186950505    | 0.5            | 0.102410023 | 0.330827068 | 0.093475253         | 0.033880008      | ESCC               |
| 15      | 0.121348038    | 0.347826087    | 0.088272941 | 0.308988764 | 0.042208013         | 0.027275347      | ESCC               |
| 16      | 0.427850655    | 0.318181818    | 0.418627966 | 0.338345865 | 0.136134299         | 0.141641041      | ESCC               |
| 17      | 0.168198953    | 0.428571429    | 0.144682339 | 0.3625      | 0.072085266         | 0.052447348      | ESCC               |
| 18      | 0.367190235    | 0.339622642    | 0.483892084 | 0.265151515 | 0.124706118         | 0.128304719      | BE,EAC,ESCC        |
| 19      | 0.45413981     | 0.291666667    | 0.315575196 | 0.290513834 | 0.132457445         | 0.09167896       | BE,EAC             |
| 20      | 0.42402472     | 0.3125         | 0.422963222 | 0.299065421 | 0.132507725         | 0.126493674      | BE,EAC             |
| Average | 0.196899751    | 0.438325839    | 0.169874885 | 0.336886326 | 0.086306249         | 0.057228526      | -                  |

DES: differential expression score; ESS: EC-subtype specificity; MIS: module importance score; ESCC: esophageal squamous cell carcinoma; EAC: esophageal adenocarcinoma; BE: Barrett's esophagus;
