# Supplementary material for: Identification of a lncRNA involved functional module for esophageal cancer subtypes
Source: Royal Society of Chemistry journal article supplement (doi:10.1039/c6mb00101g), 2016-08-05
Supplement: c6mb00101g5.pdf [file c6mb00101g5.pdf]

Supplementary Table 4. COSMIC mutated gene annotation in four risked modules

| Module16 | COSMIC_GENE_NAME | Mutated | Cancer_census |
|----------|------------------|---------|---------------|
|          | HOXD11           | n       | y             |
|          | SFTA2            | y       | n             |
|          | SHISA2           | y       | n             |
|          | C6orf58          | y       | n             |
|          | CYP27C1          | y       | n             |
|          | KRTAP19-1        | y       | n             |
|          | KRT78            | y       | n             |
|          | PPAPDC1A         | y       | n             |
|          | KRT24            | y       | n             |
|          | C1orf177         | y       | n             |
|          | AGR3             | y       | n             |
|          | ABCA13           | y       | n             |
|          | TMPRSS11B        | y       | n             |
|          | FAM3D            | y       | n             |
|          | TMEM178A         | y       | n             |
|          | ZG16B            | y       | n             |
|          | MUCL1            | y       | n             |
|          | SCGB3A1          | y       | n             |
|          | FNDC1            | y       | n             |
|          | KRTAP3-2         | y       | n             |
|          | PRSS27           | y       | n             |
|          | BPIFB2           | y       | n             |
|          | RERGL            | y       | n             |
|          | GREM2            | y       | n             |
|          | POPODC3          | y       | n             |
|          | SLURP1           | y       | n             |
|          | IL26             | y       | n             |
|          | ITLN1            | y       | n             |
|          | ANO1             | y       | n             |
|          | CRCT1            | y       | n             |
|          | CRNN             | y       | n             |
|          | SLC27A6          | y       | n             |
|          | SLCO1B3          | y       | n             |
|          | ABCA12           | y       | n             |
|          | MYRIP            | y       | n             |
|          | MMRN1            | y       | n             |
|          | CLCA4            | y       | n             |
|          | ESM1             | y       | n             |
|          | UPK1A            | y       | n             |
|          | SCGB1D2          | y       | n             |
|          | CRISP3           | y       | n             |
|          | DHRS2            | y       | n             |
|          | LGI1             | y       | n             |
|          | CCNA1            | y       | n             |
|          | WISP3            | y       | n             |
|          | SCEL             | y       | n             |
|          | SORBS2           | y       | n             |
|          | ADAM12           | y       | n             |
|          | WNT2             | y       | n             |
|          | CRISP2           | y       | n             |
|          | TNNC1            | y       | n             |
|          | TFF3             | y       | n             |
|          | TCN1             | y       | n             |
|          | SFRP4            | y       | n             |
|          | CXCL5            | y       | n             |
|          | PRH2             | y       | n             |
|          | NPY1R            | y       | n             |
|          | MYL2             | y       | n             |
|          | MSMB             | y       | n             |
|          | MMP13            | y       | n             |
|          | MMP10            | y       | n             |
|          | MMP3             | y       | n             |
|          | MMP1             | y       | n             |
|          | SCGB2A2          | y       | n             |
|          | SCGB2A1          | y       | n             |
|          | MAL              | y       | n             |
|          | MAGEA11          | y       | n             |
|          | MAGEA4           | y       | n             |
|          | GYS2             | y       | n             |
|          | GRP              | y       | n             |
|          | FOLR1            | y       | n             |
|          | FLG              | y       | n             |
|          | FCER1A           | y       | n             |
|          | EPYC             | y       | n             |
|          | DSC1             | y       | n             |
|          | CYP4B1           | y       | n             |
|          | CST1             | y       | n             |
|          | COL11A1          | y       | n             |
|          | COL10A1          | y       | n             |
|          | CEACAM7          | y       | n             |
|          | CD1E             | y       | n             |
|          | CALB1            | y       | n             |

|         |    |    |
|---------|----|----|
| AZGP1   | y  | n  |
| ADH1B   | y  | n  |
| CAPN14  | y  | n  |
| IGFL2   | y  | n  |
| STEAP1B | y  | n  |
| COL6A5  | NA | NA |
| PSCA    | NA | NA |
| CYSRT1  | NA | NA |

|          |           |    |   |
|----------|-----------|----|---|
| Module18 | A2ML1     | y  | n |
|          | AIF1L     | y  | n |
|          | BBOX1     | y  | n |
|          | BNC1      | y  | n |
|          | BNIP1L    | y  | n |
|          | BTBD11    | y  | n |
|          | CLCA2     | y  | n |
|          | CSTB      | y  | n |
|          | CWH43     | y  | n |
|          | DSC3      | y  | n |
|          | EHD3      | y  | n |
|          | EPS8L1    | y  | n |
|          | GNA15     | y  | n |
|          | GPR157    | y  | n |
|          | GPR87     | y  | n |
|          | GRHL1     | y  | n |
|          | IL20RB    | y  | n |
|          | IVL       | y  | n |
|          | LYPD3     | y  | n |
|          | MAB21L3   | y  | n |
|          | MUC15     | y  | n |
|          | PAX9      | y  | n |
|          | SERPINB13 | y  | n |
|          | SERPINB2  | y  | n |
|          | SLC16A6   | y  | n |
|          | SLC39A2   | y  | n |
|          | TGM1      | y  | n |
|          | TGM3      | y  | n |
|          | TMEM40    | y  | n |
|          | TMEM79    | y  | n |
|          | TMPRSS11E | y  | n |
|          | TPRG1     | y  | n |
| ZNF750   | y         | n  |   |
| VSIG10L  | NA        | NA |   |
| TTC9     | NA        | NA |   |

|           |          |   |   |
|-----------|----------|---|---|
| Module 19 | BCL11A   | y | y |
|           | CLIP1    | y | y |
|           | FGFR3    | y | y |
|           | MAF      | y | y |
|           | MAFB     | y | y |
|           | SMARCA4  | y | y |
|           | ABHD5    | y | n |
|           | ADH7     | y | n |
|           | AHNAK2   | y | n |
|           | AMOTL2   | y | n |
|           | ANXA1    | y | n |
|           | ARNTL2   | y | n |
|           | BCO2     | y | n |
|           | BLVRA    | y | n |
|           | BNIP3    | y | n |
|           | C10orf99 | y | n |
|           | CD1A     | y | n |
|           | CD97     | y | n |
|           | CDC14B   | y | n |
|           | CELSR2   | y | n |
|           | CLDN8    | y | n |
|           | CLIP4    | y | n |
|           | CLMN     | y | n |
|           | CNFN     | y | n |
|           | CNP      | y | n |
|           | COL4A2   | y | n |
|           | CST6     | y | n |
|           | CYP2E1   | y | n |
|           | D4S234E  | y | n |
|           | DGKA     | y | n |
|           | DHRS1    | y | n |
|           | DSG3     | y | n |
|           | ELL2     | y | n |
|           | EPB41L4B | y | n |
|           | EPCAM    | y | n |
|           | EPHA2    | y | n |
|           | ERO1L    | y | n |
|           | ESPL1    | y | n |
|           | FAM83A   | y | n |

|          |   |   |
|----------|---|---|
| FAM83D   | y | n |
| FGFBP1   | y | n |
| FKBPL    | y | n |
| FZD10    | y | n |
| GANC     | y | n |
| GCNT1    | y | n |
| GM2A     | y | n |
| GNAI3    | y | n |
| GPC1     | y | n |
| GPM6B    | y | n |
| GPR27    | y | n |
| HOPX     | y | n |
| HRASLS   | y | n |
| IL1A     | y | n |
| IL36RN   | y | n |
| KCTD11   | y | n |
| KDM2B    | y | n |
| KIAA1244 | y | n |
| KLK10    | y | n |
| KLK12    | y | n |
| KREMEN1  | y | n |
| KRT13    | y | n |
| KRT18    | y | n |
| KRT5     | y | n |
| KRT8     | y | n |
| KRT80    | y | n |
| KRTCAP2  | y | n |
| LONRF3   | y | n |
| LY6G6C   | y | n |
| MAP3K4   | y | n |
| MAST4    | y | n |
| METRNL   | y | n |
| MFAP3    | y | n |
| NDEL1    | y | n |
| NDRG4    | y | n |
| NEBL     | y | n |
| NR3C2    | y | n |
| OSTF1    | y | n |
| PAK6     | y | n |
| PBLD     | y | n |
| PDLIM4   | y | n |
| PERP     | y | n |
| PGD      | y | n |
| PITX1    | y | n |
| PLCL2    | y | n |
| PLXDC2   | y | n |
| PPP1R13L | y | n |
| PPP2R2C  | y | n |
| PRELID2  | y | n |
| PRR15    | y | n |
| PRRG4    | y | n |
| PTK6     | y | n |
| PVRL3    | y | n |
| RALGPS2  | y | n |
| RASSF6   | y | n |
| RHOBTB1  | y | n |
| RHOU     | y | n |
| RHOV     | y | n |
| RNF217   | y | n |
| RRAGD    | y | n |
| RYR1     | y | n |
| S100A16  | y | n |
| S100A8   | y | n |
| S100A9   | y | n |
| SAMD9    | y | n |
| SERPINB3 | y | n |
| SERPINB4 | y | n |
| SGK2     | y | n |
| SLC12A2  | y | n |
| SLC1A3   | y | n |
| SLC41A2  | y | n |
| SLCO3A1  | y | n |
| SNX31    | y | n |
| SPRR1A   | y | n |
| SPRR1B   | y | n |
| SPRR2A   | y | n |
| SPRR3    | y | n |
| SRPX2    | y | n |
| SSFA2    | y | n |
| STOX2    | y | n |
| SULT1B1  | y | n |
| TBC1D30  | y | n |
| TFAP2C   | y | n |
| TGM5     | y | n |

|          |    |    |
|----------|----|----|
| TM9SF3   | y  | n  |
| TMEM133  | y  | n  |
| TOLLIP   | y  | n  |
| TP63     | y  | n  |
| TRIM6    | y  | n  |
| TUBB6    | y  | n  |
| UBE2E2   | y  | n  |
| UGT8     | y  | n  |
| VAT1     | y  | n  |
| WNT4     | y  | n  |
| XG       | y  | n  |
| ZDHHC5   | y  | n  |
| ZFYVE1   | y  | n  |
| ZNRF1    | y  | n  |
| PPAPDC1B | NA | NA |
| CERS4    | NA | NA |
| LURAP1L  | NA | NA |
| GID8     | NA | NA |
| IFFO2    | NA | NA |
| MISP     | NA | NA |
| TENM2    | NA | NA |
| KAZN     | NA | NA |
| RABGGTA  | NA | NA |
| NCKAP5   | NA | NA |

|           |         |    |    |
|-----------|---------|----|----|
| Module 20 | ABCC6   | y  | n  |
|           | AGR2    | y  | n  |
|           | ANG     | y  | n  |
|           | ANXA10  | y  | n  |
|           | BMP2    | y  | n  |
|           | CAPN8   | y  | n  |
|           | CARD14  | y  | n  |
|           | CENPV   | y  | n  |
|           | CMBL    | y  | n  |
|           | CTSE    | y  | n  |
|           | FBP1    | y  | n  |
|           | FOXA3   | y  | n  |
|           | GATA6   | y  | n  |
|           | GOLM1   | y  | n  |
|           | IQGAP2  | y  | n  |
|           | LGALS4  | y  | n  |
|           | MLPH    | y  | n  |
|           | OGFRL1  | y  | n  |
|           | PDIA5   | y  | n  |
|           | PIP5K1B | y  | n  |
|           | PLA2G10 | n  | n  |
|           | RAB20   | y  | n  |
|           | RHPN2   | y  | n  |
|           | SPINK1  | y  | n  |
|           | STARD10 | y  | n  |
|           | SULT1C2 | y  | n  |
|           | SYTL2   | y  | n  |
|           | TFF1    | y  | n  |
|           | TSPAN1  | y  | n  |
|           | CYSTM1  | NA | NA |
|           | SEL1L3  | NA | NA |
|           | PHGR1   | NA | NA |

y: yes, representing the gene is annotated as a mutated one in COSMIC database or COSMIC Cancer Census; n: no, representing the gene is not annotated as a mutated one in COSMIC database or COSMIC Cancer Census
