# Supplementary material for: Identification of a lncRNA involved functional module for esophageal cancer subtypes
Source: Royal Society of Chemistry journal article supplement (doi:10.1039/c6mb00101g), 2016-08-05
Supplement: c6mb00101g6.pdf [file c6mb00101g6.pdf]

Supplementary Table 5. Gene ontology enrichment in modules.

|             | GO Biological Process                                                                        | Go ID      | GO Levels                    | Group  | %Association Genes | Term P-value | Group P-value | Association Genes | All Association Genes                                                                               | Term P-value BH-corrected | Group P-value BH-corrected |
|-------------|----------------------------------------------------------------------------------------------|------------|------------------------------|--------|--------------------|--------------|---------------|-------------------|-----------------------------------------------------------------------------------------------------|---------------------------|----------------------------|
| 16th Module | positive regulation of mast cell degranulation                                               | GO:0043306 | 4, 5, 6, 7, 8, 9, 10, 11, 12 | Group2 | 10                 | 0.004499286  | 0.008981208   | FCER1A            | ADORA2B, ADORA3, CRHR1, FCER1A, FCER1G, FGR, GAB2, MS4A1, MS4A2, SYK                                | 0.007070306               | 0.013471813                |
|             | phosphate ion homeostasis                                                                    | GO:0055062 | 8                            | Group1 | 10                 | 0.004499286  | 0.010769128   | SFRP4             | ENPP1, FGF23, FGFR4, GCM2, SFRP4, SLC34A1, SLC34A2, SLC34A3, SLC9A3R1, TFAP2B                       | 0.007070306               | 0.010769128                |
|             | positive regulation of epidermal cell differentiation                                        | GO:0045606 | 4, 5, 6, 7, 8, 9, 10         | Group1 | 7.142857075        | 0.006294135  | 0.010769128   | SFRP4             | ALOX15B, ATOH1, BMP4, CYP27B1, IL20, MBD4, MED1, NCOA3, NME2, NOTCH1, PRKCH, SFRP4, TRIM16, VDR     | 0.006923549               | 0.010769128                |
|             | ethanol oxidation                                                                            | GO:0006069 | 4, 7                         | None   | 9.090909004        | 0.004948258  | NaN           | ADH1B             | ACSS1, ACSS2, ADH1A, ADH1B, ADH1C, ADH4, ADH5, ADH6, ADH7, ALDH1A1, ALDH2                           | 0.006803855               | NaN                        |
|             | cellular response to vitamin D                                                               | GO:0071305 | 6, 7, 8                      | Group0 | 6.666666508        | 0.006742414  | 0.000219694   | TNNC1             | BGLAP, CASR, CYP24A1, CYP27B1, IL15, ITGB1, MBD4, MED1, SFRP1, SNAI2, SNW1, TNC, TNNC1, TRIM24, VDR | 0.006742414               | 0.000659082                |
|             | serotonin secretion                                                                          | GO:0001820 | 4, 5, 6, 7, 8                | Group2 | 8.333333015        | 0.005397057  | 0.008981208   | FCER1A            | CRH, FCER1A, FCER1G, HRH3, HTR1A, HTR1B, LILRB1, MAOB, P2RX1, SYK, XBP1, XBP1P1                     | 0.006596403               | 0.013471813                |
|             | positive regulation of epithelial cell proliferation involved in lung morphogenesis          | GO:0060501 | 5, 6, 7, 8, 9, 10, 11        | Group0 | 20                 | 0.002251817  | 0.000219694   | WNT2              | FGF7, FGFR2, FOXP2, SRSF6, WNT2                                                                     | 0.004953997               | 0.000659082                |
|             | atrial cardiac muscle tissue morphogenesis                                                   | GO:0055009 | 5, 6, 7, 8, 9, 10, 11        | Group0 | 16.66666603        | 0.002701658  | 0.000219694   | WNT2              | BMP10, MYH6, PITX2, PROX1, TNN2, WNT2                                                               | 0.00495304                | 0.000659082                |
|             | positive regulation of granulocyte macrophage colony-stimulating factor biosynthetic process | GO:0045425 | 6, 7, 8, 9                   | Group2 | 33.33333206        | 0.001351612  | 0.008981208   | FCER1A            | CD80, FCER1A, SYK                                                                                   | 0.003716933               | 0.013471813                |
|             | lung induction                                                                               | GO:0060492 | 4, 5, 6, 7, 8, 9, 10, 11, 12 | Group0 | 33.33333206        | 0.001351612  | 0.000219694   | WNT2              | CTNNB1, WNT2, WNT2B                                                                                 | 0.003716933               | 0.000659082                |
|             | diaphragm contraction                                                                        | GO:0002086 | 5, 7, 9                      | Group0 | 33.33333206        | 0.001351612  | 0.000219694   | TNNC1             | GAA, TNNC1, TNNI3                                                                                   | 0.003716933               | 0.000659082                |
|             | cellular response to prostaglandin D stimulus                                                | GO:0071799 | 6, 7, 8                      | Group0 | 33.33333206        | 0.001351612  | 0.000219694   | TNNC1             | PTGDR, TNC, TNNC1                                                                                   | 0.003716933               | 0.000659082                |
|             | regulation of muscle filament sliding speed                                                  | GO:0032972 | 3, 5, 6, 7, 8, 9             | Group0 | 50                 | 0.000901249  | 0.000219694   | TNNC1             | TNNC1, TNNI3                                                                                        | 0.003304579               | 0.000659082                |
|             | positive regulation of type I hypersensitivity                                               | GO:0001812 | 7, 8, 9, 10, 11              | Group2 | 50                 | 0.000901249  | 0.008981208   | FCER1A            | FCER1A, FCER1G                                                                                      | 0.003304579               | 0.013471813                |
|             | positive regulation of keratinocyte apoptotic process                                        | GO:1902174 | 6, 7, 8, 9                   | Group1 | 50                 | 0.000901249  | 0.010769128   | SFRP4             | PIAS4, SFRP4                                                                                        | 0.003304579               | 0.010769128                |

|  |                                                                              |            |                          |        |             |             |             |             |                                                                                                                                                                                   |             |             |
|--|------------------------------------------------------------------------------|------------|--------------------------|--------|-------------|-------------|-------------|-------------|-----------------------------------------------------------------------------------------------------------------------------------------------------------------------------------|-------------|-------------|
|  | positive regulation of interleukin-3 biosynthetic process                    | GO:0045401 | 6, 7, 8, 9               | Group2 | 50          | 0.000901249 | 0.008981208 | FCER1A      | FCER1A, SYK                                                                                                                                                                       | 0.003304579 | 0.013471813 |
|  | mesenchymal-epithelial cell signaling involved in prostate gland development | GO:0060739 | 3, 4, 5, 6, 7, 8         | Group0 | 50          | 0.000901249 | 0.000219694 | TNNC1       | TNC, TNNC1                                                                                                                                                                        | 0.003304579 | 0.000659082 |
|  | negative regulation of sodium-dependent phosphate transport                  | GO:2000119 | 4, 5, 6, 7, 8, 9, 10, 11 | Group1 | 100         | 0.000450711 | 0.010769128 | SFRP4       | SFRP4                                                                                                                                                                             | 0.002478913 | 0.010769128 |
|  | epithelial tube branching involved in lung morphogenesis                     | GO:0060441 | 5, 6, 7, 8, 9            | Group0 | 7.407407284 | 6.07931E-05 | 0.000219694 | TNNC1, WNT2 | BMP4, CELSR1, CTNNA1, CTSH, CTSZ, DAG1, FGF10, FGFR2, FOXA1, FOXA2, FOXF1, HHEX, HHIP, HOXA5, LAMA1, NKX2-1, RDH10, RSPO2, SHH, SOX2, TMTC3, TNC, TNF, TNNC1, VANGL2, WNT2, WNT2B | 0.000668724 | 0.000659082 |

|             |                                                                                       |            |               |      |             |             |     |       |                                     |             |     |
|-------------|---------------------------------------------------------------------------------------|------------|---------------|------|-------------|-------------|-----|-------|-------------------------------------|-------------|-----|
| 18th Module | phospholipase C-activating G-protein coupled acetylcholine receptor signaling pathway | GO:0007207 | 7, 8          | None | 33.33333206 | 0.001158599 | NaN | GNA15 | CHRM1, CHRM2, GNA15                 | 0.002317199 | NaN |
|             | caritine biosynthetic process                                                         | GO:0045329 | 5, 6, 7, 8, 9 | None | 20          | 0.001930377 | NaN | BBOX1 | ACADM, ALDH9A1, BBOX1, SHMT1, TMLHE | 0.001930377 | NaN |

|             |                                                                   |            |            |        |             |             |             |       |                                                                                                                                                          |             |             |
|-------------|-------------------------------------------------------------------|------------|------------|--------|-------------|-------------|-------------|-------|----------------------------------------------------------------------------------------------------------------------------------------------------------|-------------|-------------|
| 19th Module | positive regulation of collagen biosynthetic process              | GO:0032967 | 5, 6, 7, 8 | Group1 | 4.166666508 | 0.028972409 | 3.00563E-07 | WNT4  | AMELX, BMP4, CTGF, ENG, EP300, F2, F2R, HDAC2, IHH, ITGA2, MKX, PDGFRB, PRDX5, RGCC, SCXA, SCXB, SERPINB7, SERPINF2, SUCO, TGFB1, TGFB3, UCN, UTS2, WNT4 | 0.028972409 | 1.50281E-06 |
|             | positive regulation vascular endothelial growth factor production | GO:0010575 | 4, 5, 6    | Group1 | 4.761904716 | 0.025394844 | 3.00563E-07 | IL1A  | ADORA2B, ARNT, C3, C3AR1, C5, FLT4, GATA4, HIF1A, HPSE, IL1A, IL1B, IL6ST, ISL1, MIA3, NODAL, NOX1, PTGS2, RORA, SULF1, SULF2, TGFB1                     | 0.026731414 | 1.50281E-06 |
|             | establishment of mitotic spindle localization                     | GO:0040001 | 4, 5, 6, 7 | Group1 | 5.882352829 | 0.020605329 | 3.00563E-07 | ESPL1 | ARHGEF2, CDK5RAP2, CENPA, DYNLT1, ESPL1, EYA1, GSPM2, HTT, INSC, NDC80, NDE1, NUMA1, NUSAP1, PAFAH1B1, SLC6A4, SPDL1, ZW10                               | 0.022894809 | 1.50281E-06 |

|                                                                            |            |                      |        |             |             |             |      |                                                                                                                   |             |             |
|----------------------------------------------------------------------------|------------|----------------------|--------|-------------|-------------|-------------|------|-------------------------------------------------------------------------------------------------------------------|-------------|-------------|
| positive regulation of focal adhesion assembly                             | GO:0051894 | 4, 5, 6, 7, 8, 9, 10 | Group1 | 5.882352829 | 0.020605329 | 3.00563E-07 | WNT4 | EPB41L5, HRG, ITGB1BP1, KDR, MYOC, NRG1, PPM1F, PTPRJ, ROCK1, S100A10, SDC4, SFRP1, SMAD3, TEK, TSC1, VEGFA, WNT4 | 0.022894809 | 1.50281E-06 |
| mesonephric tubule development                                             | GO:0072164 | 4, 5, 6, 7, 8, 9, 10 | Group1 | 6.666666508 | 0.018202217 | 3.00563E-07 | WNT4 | GPC3, HNF1B, LHX1, OSR1, OXSR1, PAX2, PAX8, PKD1, PKD2, PRKD2, SIX1, WNT11, WNT4, WNT9B, WT1                      | 0.021414373 | 1.50281E-06 |
| extracellular negative regulation of signal transduction                   | GO:1900116 | 4, 5, 6, 7           | Group4 | 7.142857075 | 0.016998568 | 0.032537531 | ADH7 | ADH7, AGTR2, CD46, CER1, DAND5, DKK1, ESR2, FBN1, FBN2, IL18BP, LRPAP1, LTBP1, MTRNR2, NBL1                       | 0.02124821  | 0.032537531 |
| positive regulation of interleukin-2 biosynthetic process                  | GO:0045086 | 6, 7, 8, 9           | Group1 | 7.692307472 | 0.015793521 | 3.00563E-07 | IL1A | CARD11, CD28, CD3E, CD4, CD80, CD86, GLMN, IL1A, IL1B, IRF4, PRKCC, STAT5A, STAT5B                                | 0.021058028 | 1.50281E-06 |
| positive regulation of meiosis                                             | GO:0045836 | 4, 5, 6, 7, 8        | Group1 | 7.692307472 | 0.015793521 | 3.00563E-07 | WNT4 | CAMK2B, DAZL, DMRT1, EIF4G3, MSX1, MSX2, NPM2, PIWIL2, PLCB1, PRDM9, UBE2B, WNT4, WNT5A                           | 0.021058028 | 1.50281E-06 |
| fever generation                                                           | GO:0001660 | 6, 7                 | Group1 | 8.333333015 | 0.014587074 | 3.00563E-07 | IL1A | CNR1, EDNRB, IL1A, IL1B, IL1RN, PCDHA4, PCDHA@, PTGER3, PTGS2, TNF, TNFRSF11A, TNFSF11                            | 0.020838677 | 1.50281E-06 |
| ethanol oxidation                                                          | GO:0006069 | 4, 7                 | Group4 | 9.090909004 | 0.013379226 | 0.032537531 | ADH7 | ACSS1, ACSS2, ADH1A, ADH1B, ADH1C, ADH4, ADH5, ADH6, ADH7, ALDH1A1, ALDH2                                         | 0.020583425 | 0.032537531 |
| negative regulation of fibroblast growth factor receptor signaling pathway | GO:0040037 | 4, 5, 6, 7, 8, 9, 10 | Group1 | 9.090909004 | 0.013379226 | 3.00563E-07 | WNT4 | GATA3, GPC1, NGFR, SPRY1, SPRY2, SULF1, SULF2, TCF7L2, THBS1, WNT4, WNT5A                                         | 0.020583425 | 1.50281E-06 |
| ossification involved in bone maturation                                   | GO:0043931 | 4, 5, 6, 7, 8        | Group3 | 9.090909004 | 0.013379226 | 0.020605329 | RYR1 | BMP2, GREM1, IGF1, LEP, LTF, PHOSPHO1, PLXNB1, RHOA, RYR1, SEMA4D, THBS3                                          | 0.020583425 | 0.025756661 |
| pentose biosynthetic process                                               | GO:0019322 | 6, 7                 | Group0 | 14.28571415 | 0.008533796 | 0.010959322 | PGD  | DDR2, G6PD, PGD, PHGDH, TALDO1, TKT, UBL4A                                                                        | 0.014222993 | 0.018265537 |
| immature T cell proliferation in thymus                                    | GO:0033080 | 7, 8, 9, 10, 11, 12  | Group1 | 14.28571415 | 0.008533796 | 3.00563E-07 | WNT4 | BMP4, CDKN2A, ERBB2, FOXP3, IHH, SHH, WNT4                                                                        | 0.014222993 | 1.50281E-06 |
| cellular response to caffeine                                              | GO:0071313 | 6, 7                 | Group3 | 14.28571415 | 0.008533796 | 0.020605329 | RYR1 | CASQ2, CHEK1, GSTM2, RYR1, RYR2, RYR3, SLC8A1                                                                     | 0.014222993 | 0.025756661 |

|                                                              |            |                                  |                |             |             |                                             |        |                                                     |             |                                            |
|--------------------------------------------------------------|------------|----------------------------------|----------------|-------------|-------------|---------------------------------------------|--------|-----------------------------------------------------|-------------|--------------------------------------------|
| positive regulation of p38MAPK cascade                       | GO:1900745 | 7, 8, 9, 10, 11                  | Group1         | 14.28571415 | 0.008533796 | 3.00563E-07                                 | MAP3K4 | BMP2, GADD45A, GADD45B, GADD45G, MAP3K4, VEGFA, XDH | 0.014222993 | 1.50281E-06                                |
| ethanol catabolic process                                    | GO:0006068 | 7                                | Group4         | 16.66666603 | 0.00731892  | 0.032537531                                 | ADH7   | ADH5, ADH7, ALDH1B1, ALDH2, ALDH3B1, ALDH3B2        | 0.013307128 | 0.032537531                                |
| negative regulation of Rho GTPase activity                   | GO:0034259 | 8, 9, 10, 11, 12, 13, 14, 15, 16 | Group1         | 16.66666603 | 0.00731892  | 3.00563E-07                                 | FZD10  | ADCYAP1, ARFGEF1, FICD, FZD10, GMIP, HRAS           | 0.013307128 | 1.50281E-06                                |
| homologous chromosome segregation                            | GO:0045143 | 4, 5, 6, 7, 8                    | Group1         | 16.66666603 | 0.00731892  | 3.00563E-07                                 | ESPL1  | ESPL1, FMN2, HORMAD1, MLH1, MSH4, MSH5              | 0.013307128 | 1.50281E-06                                |
| metanephric mesenchymal cell differentiation                 | GO:0072162 | 6, 7, 8, 9, 10                   | Group1         | 16.66666603 | 0.00731892  | 3.00563E-07                                 | WNT4   | OSR1, OXSR1, PAX2, STAT1, TCF21, WNT4               | 0.013307128 | 1.50281E-06                                |
| pentose-phosphate shunt, oxidative branch                    | GO:0009051 | 6, 7, 9, 10, 11, 12, 13          | Group0         | 20          | 0.006102635 | 0.010959322                                 | PGD    | G6PD, PGD, PGLS, PHGDH, UBL4A                       | 0.01220527  | 0.018265537                                |
| somatotropin secreting cell differentiation                  | GO:0060126 | 4, 5, 6, 7, 8, 9, 10, 11, 12     | Group1         | 20          | 0.006102635 | 3.00563E-07                                 | WNT4   | GHRHR, PITX2, POU1F1, PROP1, WNT4                   | 0.01220527  | 1.50281E-06                                |
| thyroid-stimulating hormone-secreting cell differentiation   | GO:0060129 | 4, 6, 7, 8, 9, 10, 11, 12        | Group1         | 20          | 0.006102635 | 3.00563E-07                                 | WNT4   | BMP2, FGF13, FGF2, FGF8, WNT4                       | 0.01220527  | 1.50281E-06                                |
| notochord formation                                          | GO:0014028 | 3, 4, 5, 6, 7, 8, 9              | Group1, Group2 | 25          | 0.004884938 | 3.005629479051135E-7, 3.9118554747208437E-5 | EPHA2  | CRB2, EFNA1, EPHA2, T                               | 0.010855417 | 1.5028147395255675E-6, 9.77963868680211E-5 |
| chorionic trophoblast cell differentiation                   | GO:0060718 | 4, 5                             | Group1         | 25          | 0.004884938 | 3.00563E-07                                 | MAP3K4 | DNMT3L, E2F7, E2F8, MAP3K4                          | 0.010855417 | 1.50281E-06                                |
| D-gluconate metabolic process                                | GO:0019521 | 5, 6, 8, 9                       | Group0         | 33.33333206 | 0.003665827 | 0.010959322                                 | PGD    | IDNK, PGD, PHGDH                                    | 0.009164567 | 0.018265537                                |
| negative regulation of sister chromatid cohesion             | GO:0045875 | 4, 5, 6, 7                       | Group1         | 33.33333206 | 0.003665827 | 3.00563E-07                                 | ESPL1  | ESPL1, RECQL4, WAPAL                                | 0.009164567 | 1.50281E-06                                |
| axial mesoderm formation                                     | GO:0048320 | 5, 6, 7, 8, 9                    | Group1, Group2 | 33.33333206 | 0.003665827 | 3.005629479051135E-7, 3.9118554747208437E-5 | EPHA2  | AXIN1, EPHA2, NODAL                                 | 0.009164567 | 1.5028147395255675E-6, 9.77963868680211E-5 |
| positive regulation of dermatome development                 | GO:0061184 | 4, 5, 6, 7, 8                    | Group1         | 33.33333206 | 0.003665827 | 3.00563E-07                                 | WNT4   | WNT1, WNT3A, WNT4                                   | 0.009164567 | 1.50281E-06                                |
| renal vesicle induction                                      | GO:0072034 | 4, 5, 6, 7, 8, 9, 10, 11, 12, 13 | Group1         | 33.33333206 | 0.003665827 | 3.00563E-07                                 | WNT4   | SOX8, SOX9, WNT4                                    | 0.009164567 | 1.50281E-06                                |
| male germ-line sex determination                             | GO:0019100 | 5, 6, 7                          | Group1         | 50          | 0.002445302 | 3.00563E-07                                 | MAP3K4 | MAP3K4, SOX9                                        | 0.006986576 | 1.50281E-06                                |
| positive regulation of aldosterone biosynthetic process      | GO:0032349 | 5, 6, 7, 8, 9, 10                | Group1         | 50          | 0.002445302 | 3.00563E-07                                 | WNT4   | BMP6, WNT4                                          | 0.006986576 | 1.50281E-06                                |
| negative regulation of male gonad development                | GO:2000019 | 3, 4, 5, 6, 7, 8, 9, 10          | Group1         | 50          | 0.002445302 | 3.00563E-07                                 | WNT4   | ASMT, WNT4                                          | 0.006986576 | 1.50281E-06                                |
| notochord cell development                                   | GO:0060035 | 4, 5, 6, 7, 8, 9                 | Group1, Group2 | 100         | 0.00122336  | 3.005629479051135E-7, 3.9118554747208437E-5 | EPHA2  | EPHA2                                               | 0.004077866 | 1.5028147395255675E-6, 9.77963868680211E-5 |
| negative regulation of testicular blood vessel morphogenesis | GO:0061369 | 4, 5, 6, 7, 8, 9, 10, 11         | Group1         | 100         | 0.00122336  | 3.00563E-07                                 | WNT4   | WNT4                                                | 0.004077866 | 1.50281E-06                                |
| positive regulation of cortisol biosynthetic process         | GO:2000066 | 6, 7, 8, 9, 10, 11               | Group1         | 100         | 0.00122336  | 3.00563E-07                                 | WNT4   | WNT4                                                | 0.004077866 | 1.50281E-06                                |
| negative regulation of testosterone biosynthetic process     | GO:2000225 | 6, 7, 8, 9, 10                   | Group1         | 100         | 0.00122336  | 3.00563E-07                                 | WNT4   | WNT4                                                | 0.004077866 | 1.50281E-06                                |

|                                                        |            |                      |                |             |             |                                             |                   |                                                                                                                                                                                                                                                                                                               |             |                                            |
|--------------------------------------------------------|------------|----------------------|----------------|-------------|-------------|---------------------------------------------|-------------------|---------------------------------------------------------------------------------------------------------------------------------------------------------------------------------------------------------------------------------------------------------------------------------------------------------------|-------------|--------------------------------------------|
| sex determination                                      | GO:0007530 | 3, 4                 | Group1         | 8.695652008 | 0.000353281 | 3.00563E-07                                 | MAP3K4, WNT4      | AMH, CITED2, DHH, DMRT1, DMRT2, FGF9, FOXL2, IGF1R, INSR, INSR, MAP3K4, NR0B1, NR5A1, PTGDR, SF1, SOX3, SOX9, SRD5A1, SRY, TCF21, TMEM184A, WNT4, WT1                                                                                                                                                         | 0.002355206 | 1.50281E-06                                |
| branching involved in mammary gland duct morphogenesis | GO:0060444 | 6, 7, 8, 9, 10       | Group1, Group2 | 7.407407284 | 0.000488697 | 3.005629479051135E-7, 3.9118554747208437E-5 | EPHA2, WNT4       | BTRC, CAV3, CCL11, CSF1, CYP27B1, DDR1, EPHA2, ESR1, ETV4, ETV5, LRP5, LRP6, MBD4, MED1, MSX2, NCOA3, PGR, PHB2, PML, SLC12A2, SRC, TBX3, TFAP2C, TGFB1, VDR, WNT4, WNT5A                                                                                                                                     | 0.001954788 | 1.5028147395255675E-6, 9.77963868680211E-5 |
| lens morphogenesis in camera-type eye                  | GO:0002089 | 3, 4, 6, 7, 8, 9, 10 | Group2         | 8.333333015 | 0.000385116 | 3.91186E-05                                 | EPHA2, PVRL3      | BMP4, CITED2, CRYAA, CRYGB, CTNNA1, EPHA2, FGFR3, FOXE1, FOXE3, HIPK1, HIPK2, PITX3, POU2F1, PROX1, PVRL1, PVRL3, SHROOM2, SIX3, SKI, SOX1, SOX11, SOX2, TDRD7, TFAP2A                                                                                                                                        | 0.001925582 | 9.77964E-05                                |
| positive regulation of nuclear division                | GO:0051785 | 4, 5, 6, 7           | Group1         | 6.382978916 | 2.43279E-05 | 3.00563E-07                                 | ESPL1, IL1A, WNT4 | AURKA, BTC, CAMK2B, CD28, DAZL, DLGAP5, DMRT1, DRD3, EDN1, EDN3, EGF, EIF4G3, EPGN, EREG, ESPL1, FGF8, HOXA13, IGF1, IGF2, IL1A, IL1B, INS, INSR, LRP5, MSX1, MSX2, NFM2, NSMCE2, NUSAP1, PDGFB, PDGFRB, PHIP, PIWIL2, PLCB1, PLK1, PRDM9, PTEN, RB1, RGCC, SH2B1, SMC5, TERF1, TGFA, TNF, UBE2B, WNT4, WNT5A | 0.000486558 | 1.50281E-06                                |
| non-canonical Wnt signaling pathway via MAPK cascade   | GO:0038030 | 7, 8                 | Group1         | 28.5714283  | 2.96681E-05 | 3.00563E-07                                 | FZD10, WNT4       | DVL3, FZD10, FZD7, MYOC, NKD1, WNT4, WNT5A                                                                                                                                                                                                                                                                    | 0.000296681 | 1.50281E-06                                |

|                                   |            |      |        |   |             |             |      |                                                                                                                                              |             |             |
|-----------------------------------|------------|------|--------|---|-------------|-------------|------|----------------------------------------------------------------------------------------------------------------------------------------------|-------------|-------------|
| 20th Module                       |            |      |        |   |             |             |      |                                                                                                                                              |             |             |
| cellular response to BMP stimulus | GO:0071773 | 4, 6 | Group1 | 5 | 0.007702887 | 0.032020679 | BMP2 | ACVRL1, ADAMTS12, ADAMTS7, BMP2, CER1, COL2A1, DLX5, GARS, GATA3, GATA5, GATA6, HEYL, NOG, PHOX2B, RUNX2, SFRP1, SMAD1, SMAD5, TMEM100, TNMD | 0.007702887 | 0.032020679 |

|                                                                            |            |                                   |        |             |             |             |         |                                                                                                              |             |             |
|----------------------------------------------------------------------------|------------|-----------------------------------|--------|-------------|-------------|-------------|---------|--------------------------------------------------------------------------------------------------------------|-------------|-------------|
| endocardial cushion morphogenesis                                          | GO:0003203 | 5, 6, 7, 8, 9                     | Group1 | 5.882352829 | 0.006550616 | 0.032020679 | BMP2    | BMP2, BMPR1A, ENG, FGF8, HEY1, HEYL, ISL1, MSX1, MSX2, NOTCH1, RBPJ, SMAD4, SNAI2, SOX9, TBX2, TBX20, TWIST1 | 0.007146127 | 0.032020679 |
| positive regulation of osteoblast proliferation                            | GO:0033690 | 4, 5, 6                           | Group1 | 11.11111069 | 0.003472442 | 0.032020679 | BMP2    | BMP2, CTHRC1, CYR61, GATA1, HPSE, ITGAV, LRP5, LTF, SOX8                                                     | 0.005208663 | 0.032020679 |
| atrioventricular valve morphogenesis                                       | GO:0003181 | 4, 5, 6, 7, 8, 9, 10              | Group1 | 10          | 0.003857648 | 0.032020679 | BMP2    | BMP2, CYR61, GATA4, HEY1, HEYL, JUP, NOTCH1, SMAD4, TBX5, ZFPM1                                              | 0.005143531 | 0.032020679 |
| telencephalon regionalization                                              | GO:0021978 | 4, 5, 6, 7, 8, 9, 10              | Group1 | 9.090909004 | 0.00424273  | 0.032020679 | BMP2    | BHLHE22, BMP2, BMP4, EMX1, EMX2, EOMES, LHX2, NR2F1, NR2F2, PAX6, SHH                                        | 0.005091276 | 0.032020679 |
| positive regulation of prostaglandin secretion                             | GO:0032308 | 5, 6, 7, 8, 9, 10, 11, 12, 13, 14 | Group0 | 9.090909004 | 0.00424273  | 0.006166278 | PLA2G10 | AMH, IL1B, MAPK9, MIF, OXT, P2RX4, PLA2G10, S100A8, S100A9, TNFRSF11A, TNFSF11                               | 0.005091276 | 0.012332557 |
| negative regulation of calcium-independent cell-cell adhesion              | GO:0051042 | 5, 6, 7                           | Group1 | 100         | 0.000386324 | 0.032020679 | BMP2    | BMP2                                                                                                         | 0.00463589  | 0.032020679 |
| cellular response to magnesium ion                                         | GO:0071286 | 6                                 | None   | 50          | 0.000772524 | NaN         | FBP1    | FBP1, RYR3                                                                                                   | 0.004635143 | NaN         |
| BMP signaling pathway involved in heart induction                          | GO:0003130 | 6, 7, 8, 9, 10, 11, 12, 13        | Group1 | 33.33333206 | 0.001158599 | 0.032020679 | BMP2    | BMP2, BMP4, POU5F1                                                                                           | 0.004634397 | 0.032020679 |
| negative regulation of cardiac muscle cell differentiation                 | GO:2000726 | 6, 7, 8, 9, 10, 11                | Group1 | 33.33333206 | 0.001158599 | 0.032020679 | BMP2    | BMP2, DKK1, PRICKLE1                                                                                         | 0.004634397 | 0.032020679 |
| negative regulation of aldosterone biosynthetic process                    | GO:0032348 | 5, 6, 7, 8, 9, 10                 | Group1 | 25          | 0.00154455  | 0.032020679 | BMP2    | BMP2, BMP5, DKK3, REST                                                                                       | 0.004633651 | 0.032020679 |
| corticotropin hormone secreting cell differentiation                       | GO:0060128 | 4, 5, 6, 7, 8, 9, 10, 11, 12      | Group1 | 25          | 0.00154455  | 0.032020679 | BMP2    | BMP2, FGF13, FGF2, FGF8                                                                                      | 0.004633651 | 0.032020679 |
| negative regulation of cholesterol efflux                                  | GO:0090370 | 6, 7, 8, 9, 10                    | Group0 | 25          | 0.00154455  | 0.006166278 | PLA2G10 | EGF, PLA2G10, SHH, SREBF2                                                                                    | 0.004633651 | 0.012332557 |
| negative regulation of cortisol biosynthetic process                       | GO:2000065 | 6, 7, 8, 9, 10, 11                | Group1 | 25          | 0.00154455  | 0.032020679 | BMP2    | BMP2, BMP5, DKK3, REST                                                                                       | 0.004633651 | 0.032020679 |
| thyroid-stimulating hormone-secreting cell differentiation                 | GO:0060129 | 4, 6, 7, 8, 9, 10, 11, 12         | Group1 | 20          | 0.001930377 | 0.032020679 | BMP2    | BMP2, FGF13, FGF2, FGF8, WNT4                                                                                | 0.004632905 | 0.032020679 |
| negative regulation of Wnt signaling pathway involved in heart development | GO:0003308 | 5, 6, 7, 8, 9, 10, 11             | Group1 | 16.66666603 | 0.00231608  | 0.032020679 | BMP2    | BMP2, DKK1, JUP, LRP6, MESP1, SOX17                                                                          | 0.004632159 | 0.032020679 |
| bone mineralization involved in bone maturation                            | GO:0035630 | 5, 6, 7, 8, 9                     | Group1 | 16.66666603 | 0.00231608  | 0.032020679 | BMP2    | BMP2, GREM1, IGF1, LEP, LTF, PHOSPHO1                                                                        | 0.004632159 | 0.032020679 |

|                                                                              |            |                                   |        |             |             |             |         |                                                     |             |             |
|------------------------------------------------------------------------------|------------|-----------------------------------|--------|-------------|-------------|-------------|---------|-----------------------------------------------------|-------------|-------------|
| negative regulation of insulin-like growth factor receptor signaling pathway | GO:0043569 | 4, 5, 6, 7, 8, 9, 10              | Group1 | 14.28571415 | 0.002701658 | 0.032020679 | BMP2    | ATXN1, ATXN7, BMP2, BMP5, CILP, IGFBP5, NKX3-1      | 0.004631414 | 0.032020679 |
| positive regulation of arachidonic acid secretion                            | GO:0090238 | 5, 6, 7, 8, 9, 10, 11, 12, 13, 14 | Group0 | 14.28571415 | 0.002701658 | 0.006166278 | PLA2G10 | AMH, MIF, PLA2G10, PLA2G6, PLA2R1, S100A8, S100A9   | 0.004631414 | 0.012332557 |
| positive regulation of p38MAPK cascade                                       | GO:1900745 | 7, 8, 9, 10, 11                   | Group1 | 14.28571415 | 0.002701658 | 0.032020679 | BMP2    | BMP2, GADD45A, GADD45B, GADD45G, MAP3K4, VEGFA, XDH | 0.004631414 | 0.032020679 |

GO Biological Process: the name of the GO BP; Go ID: the name of the GO BP; GO Levels: the GO level the GO BP; Group: GO BPs were functionally grouped that reflects the relationships between the terms based on the similarity of their associated genes; Term Pvalue: p-value for the GO BP before BH-corrected; Group Pvalue: p-value for the GO BP group before BH-corrected; Annotated Genes: names of the annotated genes; All Association Genes: names of all the association genes in the group; Term Pvalue BH-corrected: p-value for the GO BP after BH-corrected; Group Pvalue BH-corrected: p-value for the GO BP group after BH-corrected;
