# Supplementary material for: Identification of a lncRNA involved functional module for esophageal cancer subtypes
Source: Royal Society of Chemistry journal article supplement (doi:10.1039/c6mb00101g), 2016-08-05
Supplement: c6mb00101g7.pdf [file c6mb00101g7.pdf]

Supplementary Table 6. Pathway level analysis of lncRNAs in the 16th, 19th and 20th modules.

| Modules                           | Pathways                          | Subpathway        | P-value                                                                                  | LncRNAs                                                                                  | PCGs                 |
|-----------------------------------|-----------------------------------|-------------------|------------------------------------------------------------------------------------------|------------------------------------------------------------------------------------------|----------------------|
| the 16th module                   | Fc epsilon RI signaling pathway   | path:04664_1      | 0.012337077                                                                              | CTD-2314B22.3 LINC00675                                                                  | FCER1A               |
|                                   | Asthma                            | path:05310_4      | 0.012337077                                                                              | CTD-2314B22.3 LINC00675                                                                  | FCER1A               |
|                                   |                                   | path:05310_5      | 0.012337077                                                                              | CTD-2314B22.3 LINC00675                                                                  | FCER1A               |
|                                   | Pancreatic secretion              | path:04972_2      | 0.020478054                                                                              | CTD-2314B22.3 RP11-283G6.4 LINC00675 SLC8A1-AS1 RP11-369C8.1                             | CLCA4                |
|                                   | Wnt signaling pathway             | path:04310_8      | 0.02399774                                                                               | CTD-2314B22.3 RP11-283G6.4 LINC00675 SLC8A1-AS1 RP11-369C8.1 RP11-56L13.1 LL22NC03-2H8.5 | WNT2 SFRP4           |
|                                   | Starch and sucrose metabolism     | path:00500_1<br>4 | 0.028552666                                                                              | CTD-2314B22.3 RP11-283G6.4 LINC00675 SLC8A1-AS1 RP11-369C8.1 RP11-56L13.1                | GYS2                 |
|                                   | Cardiac muscle contraction        | path:04260_1      | 0.032565253                                                                              | CTD-2314B22.3 RP11-283G6.4 LINC00675 SLC8A1-AS1 RP11-369C8.1 RP11-56L13.1 LL22NC03-2H8.5 | TNNC1                |
|                                   |                                   | path:04260_2      | 0.032565253                                                                              | CTD-2314B22.3 RP11-283G6.4 LINC00675 SLC8A1-AS1 RP11-369C8.1 RP11-56L13.1 LL22NC03-2H8.5 | TNNC1                |
|                                   | Hypertrophic cardiomyopathy (HCM) | path:05410_3      | 0.032565253                                                                              | CTD-2314B22.3 RP11-283G6.4 LINC00675 SLC8A1-AS1 RP11-369C8.1 RP11-56L13.1 LL22NC03-2H8.5 | TNNC1                |
|                                   | Dilated cardiomyopathy            | path:05414_4      | 0.032565253                                                                              | CTD-2314B22.3 RP11-283G6.4 LINC00675 SLC8A1-AS1 RP11-369C8.1 RP11-56L13.1 LL22NC03-2H8.5 | TNNC1                |
| Wnt signaling pathway             | path:04310_9                      | 0.035759176       | CTD-2314B22.3 RP11-283G6.4 LINC00675 SLC8A1-AS1 RP11-369C8.1 RP11-56L13.1 LL22NC03-2H8.5 | WNT2 SFRP4                                                                               |                      |
| Drug metabolism - cytochrome P450 | path:00982_1<br>2                 | 0.044504935       | CTD-2314B22.3 RP11-283G6.4 LINC00675 SLC8A1-AS1 RP11-369C8.1                             | ADH1B                                                                                    |                      |
| the 19th module                   | Amoebiasis                        | path:05146_1<br>1 | 0.00157669                                                                               | RP11-38P22.2 RP11-351J23.1 C5orf66-AS1 CTD-2619J13.13 CTB-113P19.4 MIR205HG              | SERPINB3<br>SERPINB4 |
|                                   | Cell adhesion molecules (CAMs)    | path:04514_1<br>6 | 0.013443535                                                                              | RP11-351J23.1 C5orf66-AS1 CTD-2619J13.13 CTB-113P19.4 MIR205HG CTD-2651B20.1             | PVRL3                |
|                                   |                                   | path:04514_4<br>1 | 0.013443535                                                                              | RP11-351J23.1 C5orf66-AS1 CTD-2619J13.13 CTB-113P19.4 MIR205HG CTD-2651B20.1             | PVRL3                |
|                                   |                                   | path:04514_4<br>2 | 0.013443535                                                                              | RP11-351J23.1 C5orf66-AS1 CTD-2619J13.13 CTB-113P19.4 MIR205HG CTD-2651B20.1             | PVRL3                |
|                                   |                                   | path:04514_4<br>3 | 0.013443535                                                                              | RP11-351J23.1 C5orf66-AS1 CTD-2619J13.13 CTB-113P19.4 MIR205HG CTD-2651B20.1             | PVRL3                |
|                                   |                                   | path:04514_4<br>4 | 0.013443535                                                                              | RP11-351J23.1 C5orf66-AS1 CTD-2619J13.13 CTB-113P19.4 MIR205HG CTD-2651B20.1             | PVRL3                |
|                                   | Axon guidance                     | path:04360_7      | 0.016281519                                                                              | RP11-351J23.1 C5orf66-AS1 CTD-2619J13.13 CTB-113P19.4 MIR205HG CTD-2651B20.1             | EPHA2 PAK6           |
|                                   | Cell cycle                        | path:04110_5      | 0.017368217                                                                              | RP11-38P22.2 RP11-351J23.1 C5orf66-AS1 CTD-2619J13.13 CTB-113P19.4 MIR205HG              | ESPL1 CDC14B         |

|                                              |                   |             |                                                                                                     |                |
|----------------------------------------------|-------------------|-------------|-----------------------------------------------------------------------------------------------------|----------------|
| Pentose phosphate pathway                    | path:00030_6      | 0.020097834 | RP11-38P22.2 RP11-351J23.1<br>C5orf66-AS1 CTD-2619J13.13<br>MIR205HG                                | PGD            |
| O-Glycan biosynthesis                        | path:00512_3      | 0.020097834 | RP11-351J23.1 CTB-113P19.4                                                                          | GCNT1          |
| Metabolism of xenobiotics by cytochrome P450 | path:00980_1      | 0.020806425 | RP11-38P22.2 RP11-351J23.1<br>C5orf66-AS1 CTD-2619J13.13<br>CTB-113P19.4 MIR205HG CTD-<br>2651B20.1 | ADH7 CYP2E1    |
| Basal cell carcinoma                         | path:05217_5      | 0.022010387 | RP11-351J23.1 C5orf66-AS1<br>CTD-2619J13.13 CTB-113P19.4<br>MIR205HG CTD-2651B20.1                  | FZD10 WNT4     |
| Melanogenesis                                | path:04916_7      | 0.023242568 | RP11-351J23.1 C5orf66-AS1<br>CTD-2619J13.13 CTB-113P19.4<br>MIR205HG CTD-2651B20.1                  | FZD10 WNT4     |
| Basal cell carcinoma                         | path:05217_4      | 0.024502537 | RP11-351J23.1 C5orf66-AS1<br>CTD-2619J13.13 CTB-113P19.4<br>MIR205HG CTD-2651B20.1                  | FZD10 WNT4     |
| Pathways in cancer                           | path:05200_2      | 0.02578987  | RP11-351J23.1 C5orf66-AS1<br>CTD-2619J13.13 CTB-113P19.4<br>MIR205HG CTD-2651B20.1                  | FZD10 WNT4     |
| Galactose metabolism                         | path:00052_3      | 0.026707553 | C5orf66-AS1 CTD-2619J13.13                                                                          | GANC           |
| MAPK signaling pathway                       | path:04010_1<br>4 | 0.026707553 | RP11-38P22.2 RP11-351J23.1<br>CTB-113P19.4 MIR205HG                                                 | MAP3K4         |
| Axon guidance                                | path:04360_2      | 0.026707553 | RP11-38P22.2 C5orf66-AS1<br>CTD-2619J13.13 CTB-113P19.4<br>MIR205HG                                 | GNAI3          |
| Basal cell carcinoma                         | path:05217_2      | 0.027104145 | RP11-351J23.1 C5orf66-AS1<br>CTD-2619J13.13 CTB-113P19.4<br>MIR205HG CTD-2651B20.1                  | FZD10 WNT4     |
|                                              | path:05217_1      | 0.029811859 | RP11-351J23.1 C5orf66-AS1<br>CTD-2619J13.13 CTB-113P19.4<br>MIR205HG CTD-2651B20.1                  | FZD10 WNT4     |
| Drug metabolism - cytochrome P450            | path:00982_1<br>1 | 0.03327299  | RP11-351J23.1 C5orf66-AS1<br>CTD-2619J13.13 CTB-113P19.4<br>MIR205HG CTD-2651B20.1                  | CYP2E1         |
| Cytokine-cytokine receptor interaction       | path:04060_1<br>8 | 0.03327299  | C5orf66-AS1 CTD-2619J13.13<br>MIR205HG                                                              | IL1A           |
| Long-term depression                         | path:04730_7      | 0.038539166 | RP11-38P22.2 RP11-351J23.1<br>C5orf66-AS1 CTD-2619J13.13<br>CTB-113P19.4 MIR205HG                   | GNAI3 RYR1     |
| Toxoplasmosis                                | path:05145_5      | 0.039794438 | RP11-38P22.2 C5orf66-AS1<br>CTD-2619J13.13 CTB-113P19.4<br>MIR205HG                                 | GNAI3          |
| Starch and sucrose metabolism                | path:00500_1      | 0.04627219  | C5orf66-AS1 CTD-2619J13.13                                                                          | GANC           |
| Protein processing in endoplasmic reticulum  | path:04141_9      | 0.04627219  | RP11-38P22.2 C5orf66-AS1<br>CTD-2619J13.13 CTB-113P19.4<br>MIR205HG                                 | ERO1L          |
| Long-term depression                         | path:04730_2      | 0.046457677 | RP11-38P22.2 RP11-351J23.1<br>C5orf66-AS1 CTD-2619J13.13<br>CTB-113P19.4 MIR205HG                   | GNAI3 RYR1     |
|                                              | path:04730_6      | 0.046457677 | RP11-38P22.2 RP11-351J23.1<br>C5orf66-AS1 CTD-2619J13.13<br>CTB-113P19.4 MIR205HG                   | GNAI3 RYR1     |
| Regulation of actin cytoskeleton             | path:04810_6      | 0.004224273 | RP11-351J23.1 C5orf66-AS1<br>CTB-113P19.4 CTD-2651B20.1<br>RP3-512B11.3 RP3-428L16.2                | PIP5K1B IQGAP2 |
|                                              | path:04810_9      | 0.004224273 | RP11-351J23.1 C5orf66-AS1<br>CTB-113P19.4 CTD-2651B20.1<br>RP3-512B11.3 RP3-428L16.2                | PIP5K1B IQGAP2 |
|                                              | path:04810_5      | 0.014587967 | RP11-351J23.1 C5orf66-AS1<br>CTD-2651B20.1 RP3-512B11.3                                             | PIP5K1B        |
| Maturity onset diabetes of the young         | path:04950_3      | 0.016035373 | C5orf66-AS1 CTD-2651B20.1<br>RP3-512B11.3 RP3-428L16.2                                              | FOXA3          |
| TGF-beta signaling pathway                   | path:04350_9      | 0.021804428 | RP11-351J23.1                                                                                       | BMP2           |

the 20th module

|                                  |                   |             |                                                                                                |         |
|----------------------------------|-------------------|-------------|------------------------------------------------------------------------------------------------|---------|
| Toxoplasmosis                    | path:05145_1      | 0.023241564 | RP11-351J23.1 CTD-2651B20.1                                                                    | PLA2G10 |
| alpha-Linolenic acid metabolism  | path:00592_1      | 0.024676655 | RP11-351J23.1 CTD-2651B20.1                                                                    | PLA2G10 |
| Regulation of actin cytoskeleton | path:04810_1<br>1 | 0.024676655 | RP11-351J23.1 C5orf66-AS1<br>CTB-113P19.4 RP3-512B11.3<br>RP3-428L16.2 LINC00261               | IQGAP2  |
| Glycolysis / Gluconeogenesis     | path:00010_5      | 0.026109702 | RP11-351J23.1 C5orf66-AS1<br>CTB-113P19.4 MIR205HG CTD-<br>2651B20.1 RP3-512B11.3<br>LINC00261 | FBP1    |
| Fructose and mannose metabolism  | path:00051_3      | 0.026109702 | RP11-351J23.1 C5orf66-AS1<br>CTB-113P19.4 MIR205HG CTD-<br>2651B20.1 RP3-512B11.3<br>LINC00261 | FBP1    |
| Fc gamma R-mediated phagocytosis | path:04666_1<br>2 | 0.026109702 | RP11-351J23.1 C5orf66-AS1<br>CTD-2651B20.1 RP3-512B11.3                                        | PIP5K1B |
| Glycolysis / Gluconeogenesis     | path:00010_7      | 0.02754071  | RP11-351J23.1 C5orf66-AS1<br>CTB-113P19.4 MIR205HG CTD-<br>2651B20.1 RP3-512B11.3<br>LINC00261 | FBP1    |
| Fructose and mannose metabolism  | path:00051_9      | 0.02754071  | RP11-351J23.1 C5orf66-AS1<br>CTB-113P19.4 MIR205HG CTD-<br>2651B20.1 RP3-512B11.3<br>LINC00261 | FBP1    |
| Glycolysis / Gluconeogenesis     | path:00010_2      | 0.028969681 | RP11-351J23.1 C5orf66-AS1<br>CTB-113P19.4 MIR205HG CTD-<br>2651B20.1 RP3-512B11.3<br>LINC00261 | FBP1    |
|                                  | path:00010_6      | 0.030396618 | RP11-351J23.1 C5orf66-AS1<br>CTB-113P19.4 MIR205HG CTD-<br>2651B20.1 RP3-512B11.3<br>LINC00261 | FBP1    |
| Inositol phosphate metabolism    | path:00562_6      | 0.033244399 | RP11-351J23.1 C5orf66-AS1<br>CTD-2651B20.1 RP3-512B11.3                                        | PIP5K1B |
| Ether lipid metabolism           | path:00565_3      | 0.033244399 | RP11-351J23.1 CTD-2651B20.1                                                                    | PLA2G10 |
| Pentose phosphate pathway        | path:00030_1      | 0.03466525  | RP11-351J23.1 C5orf66-AS1<br>CTB-113P19.4 MIR205HG CTD-<br>2651B20.1 RP3-512B11.3<br>LINC00261 | FBP1    |
|                                  | path:00030_2      | 0.03466525  | RP11-351J23.1 C5orf66-AS1<br>CTB-113P19.4 MIR205HG CTD-<br>2651B20.1 RP3-512B11.3<br>LINC00261 | FBP1    |
| Fc epsilon RI signaling pathway  | path:04664_7      | 0.03466525  | RP11-351J23.1 CTD-2651B20.1                                                                    | PLA2G10 |
| Fructose and mannose metabolism  | path:00051_7      | 0.036084077 | RP11-351J23.1 C5orf66-AS1<br>CTB-113P19.4 MIR205HG CTD-<br>2651B20.1 RP3-512B11.3<br>LINC00261 | FBP1    |
|                                  | path:00051_1<br>1 | 0.037500884 | RP11-351J23.1 C5orf66-AS1<br>CTB-113P19.4 MIR205HG CTD-<br>2651B20.1 RP3-512B11.3<br>LINC00261 | FBP1    |
| Inositol phosphate metabolism    | path:00562_1<br>1 | 0.037500884 | RP11-351J23.1 C5orf66-AS1<br>CTD-2651B20.1 RP3-512B11.3                                        | PIP5K1B |
| Pentose phosphate pathway        | path:00030_3      | 0.038915674 | RP11-351J23.1 C5orf66-AS1<br>CTB-113P19.4 MIR205HG CTD-<br>2651B20.1 RP3-512B11.3<br>LINC00261 | FBP1    |
| Fructose and mannose             | path:00051_1      | 0.040328449 | RP11-351J23.1 C5orf66-AS1<br>CTB-113P19.4 MIR205HG CTD-<br>2651B20.1 RP3-512B11.3<br>LINC00261 | FBP1    |

|                                     |                   |             |                                                                                                |         |
|-------------------------------------|-------------------|-------------|------------------------------------------------------------------------------------------------|---------|
| metabolism                          | path:00051_2      | 0.040328449 | RP11-351J23.1 C5orf66-AS1<br>CTB-113P19.4 MIR205HG CTD-<br>2651B20.1 RP3-512B11.3<br>LINC00261 | FBP1    |
| Linoleic acid metabolism            | path:00591_1      | 0.040328449 | RP11-351J23.1 CTD-2651B20.1                                                                    | PLA2G10 |
| Fc gamma R-mediated<br>phagocytosis | path:04666_1<br>4 | 0.040328449 | RP11-351J23.1 C5orf66-AS1<br>CTD-2651B20.1 RP3-512B11.3                                        | PIP5K1B |
| Ether lipid metabolism              | path:00565_2      | 0.043147966 | RP11-351J23.1 CTD-2651B20.1                                                                    | PLA2G10 |
| Pathways in cancer                  | path:05200_3      | 0.043147966 | RP11-351J23.1                                                                                  | BMP2    |
| Inositol phosphate metabolism       | path:00562_4      | 0.0473622   | RP11-351J23.1 C5orf66-AS1<br>CTD-2651B20.1 RP3-512B11.3                                        | PIP5K1B |
