# Supplementary material for: Identification of a lncRNA involved functional module for esophageal cancer subtypes
Source: Royal Society of Chemistry journal article supplement (doi:10.1039/c6mb00101g), 2016-08-05
Supplement: c6mb00101g8.pdf [file c6mb00101g8.pdf]

**Supplementary Table 7. Overlapping results between DE-lncRNAs in ESCC, lncRNA expression profiles and ESCC/normal group**

|                             | GSE45350  | GSE53624  |
|-----------------------------|-----------|-----------|
| DE-lncRNAs in lncRNA arrays | 92        | 151       |
| DE-lncRNAs in ESCC/normal   | 1146      | 1146      |
| Overlap DE-lncRNAs          | 9         | 29        |
| <i>P</i> -value             | 2.15E-119 | 1.05E-142 |

ESCC: esophageal squamous cell carcinoma. *P*-value: statistical significance of hypergeometric test.
